# Supplementary material
Source: publisher site journal article supplement (https://www.spandidos-publications.com/2669/downloadSupplementary)
Supplement: Supplementary file 1 [file downloadSupplementary]

## Sheet: up_H30_KLF5_vs_L5_5_KLF5
# Fold Change cut-off: 1.0 # Condition pairs: H30_KLF5_vs_L5_5_KLF5 # Column A: ProbeName it represents probe name. # Column B: Fold change, Absolute Fold change between two samples. # Column C: Regulation, it depicts which sample has greater or lower intensity values wrt other sample. # Column D ~ V: Annotations to each probe, including type, seqname, GeneSymbol, source, RNAlength, chrom, strand…
H30_KLF5_vs_L5_5_KLF5 1.0 fold up regulated LncRNAs
	Fold change and Regulation		Annotations																			Raw Intensity		Normalized Intensity
ProbeName	Fold Change	Regulation	type	seqname	GeneSymbol	source	RNAlength	chrom	strand	txStart	txEnd	Xhyb	Sequence	EntrezID	relationship	Associated_gene_acc	Associated_gene_name	Associated_protein_name	Associated_gene_strand	Associated_gene_start	Associated_gene_end	[H30_KLF5](raw)	[L5_5_KLF5](raw)	[H30_KLF5](normalized)	[L5_5_KLF5](normalized)
ASHGA5P031496	1.31286	up	noncoding	ENST00000567904	RP11-533E19.5	GENCODE	1257	chr1	-	179922318	179923575		AAGCCCTGTGTTAGATGCTTTTCATGCGCTATTTTACTGAATGTAAACAACCACCTTATT		bidirectional	NM_014810	CEP350	centrosome-associated protein 350	+	179923907	180084015	219.521	151.589	7.77342	7.38071
ASHGA5P047663	1.24876	up	noncoding	NR_038937	LOC100505761	RefSeq	1622	chr10	+	104209573	104216050		TACCAGGCAAAAGGAAACACCTTGAGCTGGCCAGGAGCTACCAGCGTCTGTCTACACCTG	100505761	natural antisense	NM_024886	C10orf95	uncharacterized protein C10orf95	-	104209593	104211300	46.3945	37.5701	5.4583	5.1378
ASHGA5P018786	2.14459	up	noncoding	ENST00000457645	BX248398.1	GENCODE	554	chr1	-	144300516	144301385	ENST00000434159	TTTAGTCCTTTGAAGAGAGCAGAATGGGGAAATGGAGAGAGAACCTGAAAGAGCCCCAAA		intergenic							1444.88	563.021	10.4769	9.3762
ASHGA5P021269	1.24102	up	noncoding	ENST00000529082	RP11-428C19.5	GENCODE	422	chr11	+	19321548	19329905		TTAGATAACTGTGCCTGATCCCTATGGCCAGGAAGGAAGGAGCTGAAGAATTCACATTTG		intergenic							61.5256	49.5867	5.88576	5.57424
ASHGA5P057058	1.02415	up	noncoding	TCONS_00012359	XLOC_005919	LincRNAs identified by Cabili et al	747	chr6	-	166471806	166473129		AACAGACCCTGCCACAGTTCTGGGAGTGCATGTTTGAAATGAAAATGGAAATTAGCCCAG		intergenic							150.451	133.927	7.21709	7.18266
ASHGA5P058077	1.11246	up	noncoding	TCONS_00026346	XLOC_012698	LincRNAs identified by Cabili et al	311	chr18	+	57792169	57796757		AAAGGAAGAGGGGTTAACAGATGAATTCGCAAAGACAGCTCTTCTGGCCAAGAATATGGA		intergenic							26.0944	24.7324	4.61244	4.45869
ASHGA5P031073	1.3263	up	noncoding	ENST00000567795	CTD-2574D22.4	GENCODE	2270	chr16	-	29930956	29933226		GAGTATGTGTGTGTGTGTGTATTTGCTTGCCAAAATACAATCGTGTTGTATGAAATGTTT		intron sense-overlapping	NM_178863	KCTD13	BTB/POZ domain-containing adapter for CUL3-mediated RhoA degradation protein 1	-	29917656	29937545	27174.2	17472.8	14.698	14.2906
ASHGA5P022755	1.7163	up	noncoding	ENST00000562227	ZNF192P1	GENCODE	1113	chr6	+	28130400	28134936		ACATGAACAGTACCTGCTACATAGGAAGTGCTATCCAGTCAACTCACAAATCCCTGAGAG		intergenic							153.623	85.4326	7.24659	6.46729
ASHGA5P039495	1.70456	up	noncoding	uc003hrl.1	unknown	UCSC_knowngene	1741	chr4	-	89178767	89180508		GCTTTGACCATTGTTTTAAATCTGTGTACTAGAGTAACTGTGAGCAGAATGAAATCACAT		intergenic							675.835	339.615	9.38357	8.61417
ASHGA5P025630	1.15202	up	noncoding	NR_015416	LOC727924	RefSeq	1680	chr15	+	22278031	22371088		GAAAAAAAGAAAAAACTATATTATGAAAAGAGTAAATTGAAGAAATGGAAACTGCAAATT	727924	exon sense-overlapping	NM_001004719	OR4M2	olfactory receptor 4M2	+	22368477	22369561	196.455	154.046	7.60992	7.40575
ASHGA5P033710	1.77261	up	noncoding	ENST00000577848	RP11-874J12.4	GENCODE	1455	chr18	+	3653409	3656282		ACGCATGCTTCAGATTTGGATTTTTCTTTTTCTGCTGGCATTGCAAGAACGTAACTAAAC		intronic antisense	NM_001003809	DLGAP1	disks large-associated protein 1 isoform 2	-	3496029	3845358	2184.99	1017	11.0874	10.2616
ASHGA5P033710	1.77261	up	noncoding	ENST00000577848	RP11-874J12.4	GENCODE	1455	chr18	+	3653409	3656282		ACGCATGCTTCAGATTTGGATTTTTCTTTTTCTGCTGGCATTGCAAGAACGTAACTAAAC		intronic antisense	NM_001242761	DLGAP1	disks large-associated protein 1 isoform 3	-	3502142	4455266	2184.99	1017	11.0874	10.2616
ASHGA5P033710	1.77261	up	noncoding	ENST00000577848	RP11-874J12.4	GENCODE	1455	chr18	+	3653409	3656282		ACGCATGCTTCAGATTTGGATTTTTCTTTTTCTGCTGGCATTGCAAGAACGTAACTAAAC		intronic antisense	NM_001242762	DLGAP1	disks large-associated protein 1 isoform 4	-	3496029	3874767	2184.99	1017	11.0874	10.2616
ASHGA5P033710	1.77261	up	noncoding	ENST00000577848	RP11-874J12.4	GENCODE	1455	chr18	+	3653409	3656282		ACGCATGCTTCAGATTTGGATTTTTCTTTTTCTGCTGGCATTGCAAGAACGTAACTAAAC		intronic antisense	NM_001242764	DLGAP1	disks large-associated protein 1 isoform 6	-	3496029	3874253	2184.99	1017	11.0874	10.2616
ASHGA5P033710	1.77261	up	noncoding	ENST00000577848	RP11-874J12.4	GENCODE	1455	chr18	+	3653409	3656282		ACGCATGCTTCAGATTTGGATTTTTCTTTTTCTGCTGGCATTGCAAGAACGTAACTAAAC		intronic antisense	NM_001242765	DLGAP1	disks large-associated protein 1 isoform 7	-	3502142	3845358	2184.99	1017	11.0874	10.2616
ASHGA5P033710	1.77261	up	noncoding	ENST00000577848	RP11-874J12.4	GENCODE	1455	chr18	+	3653409	3656282		ACGCATGCTTCAGATTTGGATTTTTCTTTTTCTGCTGGCATTGCAAGAACGTAACTAAAC		intronic antisense	NM_004746	DLGAP1	disks large-associated protein 1 isoform 1	-	3496029	4455266	2184.99	1017	11.0874	10.2616
ASHGA5P033710	1.77261	up	noncoding	ENST00000577848	RP11-874J12.4	GENCODE	1455	chr18	+	3653409	3656282		ACGCATGCTTCAGATTTGGATTTTTCTTTTTCTGCTGGCATTGCAAGAACGTAACTAAAC		natural antisense	NM_001242763	DLGAP1	disks large-associated protein 1 isoform 5	-	3496029	3874767	2184.99	1017	11.0874	10.2616
ASHGA5P033710	1.77261	up	noncoding	ENST00000577848	RP11-874J12.4	GENCODE	1455	chr18	+	3653409	3656282		ACGCATGCTTCAGATTTGGATTTTTCTTTTTCTGCTGGCATTGCAAGAACGTAACTAAAC		natural antisense	NM_001242766	DLGAP1	disks large-associated protein 1 isoform 8	-	3496029	3845358	2184.99	1017	11.0874	10.2616
ASHGA5P053113	1.0828	up	noncoding	uc011kep.2	PMS2L2	UCSC_knowngene	522	chr7	+	72509965	72519759	NR_003613, NR_023383, NR_027775, NR_027776, NR_028058, NR_046297, uc003txh.4, uc003txn.4, uc003uca.4, uc003uui.2, uc010lbw.2, uc010lgv.1, uc011kfp.2, uc011kfq.2	TTCTTCTAGATGATCTGCACAAATGGTTCCTCTCCTCCTTCCTGATGTCTGCCATTAGCA	5380	intergenic							19378.8	15503.6	14.2342	14.1195
ASHGA5P017323	1.18999	up	noncoding	ENST00000440196	RP5-857K21.3	GENCODE	437	chr1	+	529832	530595		GGAGGCCCAGCTGAGTTTGGATCATAATCCTTTTAAAAATGTAAATAAATAACATCGACA		intergenic							77.3973	62.7412	6.22147	5.97051
ASHGA5P033382	2.24405	up	noncoding	TCONS_00028475	XLOC_013431	LincRNAs identified by Cabili et al	373	chr20	+	1166982	1170031		TTAAGATGAGTCCAGCGAAGTGCCTAGAGTACCAAATTCATGGAGACGTTTCCTCTTTGG		intergenic							35.9388	17.811	5.08024	3.91413
ASHGA5P036006	1.2659	up	noncoding	ENST00000450072	AC017099.3	GENCODE	587	chr2	+	98280679	98292184		GCCCTCTCCAAGGAGGCCGGCCCTGGATATTTCACCCAAAATATTTATTTTTTCTTTTTT		bidirectional	NM_005735	ACTR1B	beta-centractin	-	98272401	98280561	42635	29594.1	15.3432	15.0031
ASHGA5P053079	1.04416	up	noncoding	ENST00000450436	SEPT7P2	GENCODE	601	chr7	-	45797709	45808584	NR_024271, uc003tnf.4	TTCCAGGATCGCGCATTAGCGGACGCTGGCTACGGGTGGCCGGGCGGGATGTAACCGGCT	641977	intergenic							55.6376	52.6766	5.73509	5.67275
ASHGA5P016348	1.15877	up	noncoding	NR_037175	LOC100507463	RefSeq	1333	chr6	+	32811862	32814277		AAAGCCCACTTGGCGATGGGTTACAGTAAGAGGTTTCCCCTCCAGGTGCAGCTTCAGAGC	100507463	natural antisense	NM_000593	TAP1	antigen peptide transporter 1	-	32812985	32821748	1192.33	850.253	10.2103	9.99767
ASHGA5P016348	1.15877	up	noncoding	NR_037175	LOC100507463	RefSeq	1333	chr6	+	32811862	32814277		AAAGCCCACTTGGCGATGGGTTACAGTAAGAGGTTTCCCCTCCAGGTGCAGCTTCAGAGC	100507463	natural antisense	NM_004159	PSMB8	proteasome subunit beta type-8 isoform E1 proprotein	-	32808493	32812712	1192.33	850.253	10.2103	9.99767
ASHGA5P040128	2.30448	up	noncoding	ENST00000512538	SLC7A11-AS1	GENCODE	376	chr4	+	139092783	139095924		TTAAGGATAATCAACCCGCGGTACTCTTTCTTTAAATAAAGGTGTGTTAATGAGTCTGCA	641364	natural antisense	NM_014331	SLC7A11	cystine/glutamate transporter	-	139085247	139163503	134.288	58.1071	7.04688	5.84244
ASHGA5P056151	1.75832	up	noncoding	ENST00000407889	RP11-96L14.7	GENCODE	694	chr1	-	26496437	26498156		ACTCACGCGCAGGCCAGACAGCGGTGCAGACCGCCCCCTGGCAGGTCGGGGTCGAACTCG		natural antisense	NM_015871	ZNF593	zinc finger protein 593	+	26496387	26497364	35.8005	21.9073	5.07344	4.25925
ASHGA5P025844	2.65975	up	noncoding	NR_038863	LOC285758	RefSeq	2764	chr6	-	114189178	114194512		CGATGGTTTCACAGTAACTCATGCTTTCAAAATATCAGGAAGCAAATGAGAAAAGGAAAA	285758	intergenic							26.8467	11.7778	4.65505	3.24376
ASHGA5P032068	1.03778	up	noncoding	ENST00000574016	MIR22HG	GENCODE	557	chr17	-	1616268	1619504	NR_028502	TGGTATGTGATCCCCAGCTCAGGCCTGTGCAGACAGGAAATTCTCCCCTGCAGCAAGTAG	84981	bidirectional	NM_001163673	WDR81	WD repeat-containing protein 81 isoform 3	+	1619816	1641893	1708.73	1353.09	10.7302	10.6767
ASHGA5P032068	1.03778	up	noncoding	ENST00000574016	MIR22HG	GENCODE	557	chr17	-	1616268	1619504	NR_028502	TGGTATGTGATCCCCAGCTCAGGCCTGTGCAGACAGGAAATTCTCCCCTGCAGCAAGTAG	84981	bidirectional	NM_152348	WDR81	WD repeat-containing protein 81 isoform 2	+	1619816	1641893	1708.73	1353.09	10.7302	10.6767
ASHGA5P057199	1.27473	up	noncoding	TCONS_00014425	XLOC_006625	LincRNAs identified by Cabili et al	284	chr7	-	141212966	141215416		GAAGGATGACATAAAGCAGAGTCTCTACCTCTATGTCCATCATTCAATAAATATTTAGTC		intergenic							56.2765	44.5384	5.7536	5.4034
ASHGA5P027411	1.0789	up	noncoding	ENST00000546086	RP11-81H14.2	GENCODE	565	chr12	-	68727032	68835996	ENST00000539404, ENST00000541707	GATCCTGTAGCCCTTATTATTGACACCTTTCATTTAGAAATTTAGCACATGTCACATTAC		intergenic							115.993	100.57	6.83256	6.72299
ASHGA5P020046	1.21104	up	noncoding	uc003jcs.3	LOC728613	UCSC_knowngene	1056	chr5	-	1599035	1634120	uc010ith.1	GCCTCACCGAGCCAGGCACGTGGACTCCCTTTAATCCAGTGACTGTCAGGTCGATCATAT	728613	intergenic							35626	25155.8	15.0723	14.7961
ASHGA5P043678	1.39694	up	noncoding	ENST00000421500	RP11-310H4.2	GENCODE	939	chr7	+	55659766	55660886		AAAGTGAGAGATACCCTGTGGCTAATACCATAAGGCATTAGACAGCATGAAGTGCTCGAG		intergenic							25.9336	20.2155	4.60199	4.11971
ASHGA5P028907	2.08049	up	noncoding	ENST00000434547	STK24-AS1	GENCODE	1278	chr13	+	99229497	99231084	TCONS_00021879	AACGGAACAGCCAAAAAGTCTCACAGAGGTTAAGTAAATAATAGCATTTTCATACGAGTA		bidirectional	NM_001032296	STK24	serine/threonine-protein kinase 24 isoform b	-	99102454	99229396	32.5357	17.387	4.92757	3.87065
ASHGA5P048161	1.21274	up	noncoding	ENST00000542121	RP11-855O10.3	GENCODE	462	chr11	-	61422136	61423174		ATATTTTCCTGTGACTTAAGAGCAATGGCCAAGCTGGCTTCCTGCTATCCTACCCTTGAA		intergenic							245.033	180.011	7.93292	7.65465
ASHGA5P033509	1.49302	up	noncoding	ENST00000579805	RP11-789C17.5	GENCODE	193	chr18	-	8406758	8406951		CGTTTCCAGGCCTTAAGAAAAATGATTGTCACTCACTGTGCTTCACAAAAATTTCTTTTA		natural antisense	NM_001105244	PTPRM	receptor-type tyrosine-protein phosphatase mu isoform 1 precursor	+	7567313	8406859	50.4725	34.6889	5.58991	5.01168
ASHGA5P033509	1.49302	up	noncoding	ENST00000579805	RP11-789C17.5	GENCODE	193	chr18	-	8406758	8406951		CGTTTCCAGGCCTTAAGAAAAATGATTGTCACTCACTGTGCTTCACAAAAATTTCTTTTA		natural antisense	NM_002845	PTPRM	receptor-type tyrosine-protein phosphatase mu isoform 2 precursor	+	7567313	8406859	50.4725	34.6889	5.58991	5.01168
ASHGA5P046830	1.80806	up	noncoding	ENST00000456938	RP11-285G1.8	GENCODE	2463	chr10	-	45497678	45567036		CACTTCTTTAAGAACCCTCCTTCAAATTCCTGAATAAAGCTGCTAACTAAGACAAATGAA		natural antisense	NM_006963	ZNF22	zinc finger protein 22	+	45496272	45500777	141.925	75.7897	7.13237	6.27793
ASHGA5P028311	1.02584	up	noncoding	ENST00000540161	RP11-227B21.2	GENCODE	562	chr12	+	117890816	117894791		TCAACTCACTCTGCAACAGTCGACACAAACAAACATGGAGAAAAGAATATGGACCATCGG		natural antisense	NM_173598	KSR2	kinase suppressor of Ras 2	-	117890816	118406028	31.2245	31.1307	4.86586	4.82906
ASHGA5P033259	1.18031	up	noncoding	NR_038410	BZRAP1-AS1	RefSeq	2500	chr17	+	56402810	56431088		TAACATCTTGTCTGCATCCCACAACAGGCAGATGGCCCTGTGCAGGGCTGAGCTGGAAGA	100506779	natural antisense	NM_001261835	BZRAP1	peripheral-type benzodiazepine receptor-associated protein 1 isoform c	-	56378587	56406152	74.7444	61.1344	6.16606	5.92689
ASHGA5P033259	1.18031	up	noncoding	NR_038410	BZRAP1-AS1	RefSeq	2500	chr17	+	56402810	56431088		TAACATCTTGTCTGCATCCCACAACAGGCAGATGGCCCTGTGCAGGGCTGAGCTGGAAGA	100506779	natural antisense	NM_003168	SUPT4H1	transcription elongation factor SPT4	-	56422538	56429563	74.7444	61.1344	6.16606	5.92689
ASHGA5P033259	1.18031	up	noncoding	NR_038410	BZRAP1-AS1	RefSeq	2500	chr17	+	56402810	56431088		TAACATCTTGTCTGCATCCCACAACAGGCAGATGGCCCTGTGCAGGGCTGAGCTGGAAGA	100506779	natural antisense	NM_004758	BZRAP1	peripheral-type benzodiazepine receptor-associated protein 1 isoform a	-	56378587	56406152	74.7444	61.1344	6.16606	5.92689
ASHGA5P033259	1.18031	up	noncoding	NR_038410	BZRAP1-AS1	RefSeq	2500	chr17	+	56402810	56431088		TAACATCTTGTCTGCATCCCACAACAGGCAGATGGCCCTGTGCAGGGCTGAGCTGGAAGA	100506779	natural antisense	NM_017763	RNF43	E3 ubiquitin-protein ligase RNF43 precursor	-	56431037	56494931	74.7444	61.1344	6.16606	5.92689
ASHGA5P033259	1.18031	up	noncoding	NR_038410	BZRAP1-AS1	RefSeq	2500	chr17	+	56402810	56431088		TAACATCTTGTCTGCATCCCACAACAGGCAGATGGCCCTGTGCAGGGCTGAGCTGGAAGA	100506779	natural antisense	NM_024418	BZRAP1	peripheral-type benzodiazepine receptor-associated protein 1 isoform b	-	56378587	56406152	74.7444	61.1344	6.16606	5.92689
ASHGA5P057526	3.12711	up	noncoding	TCONS_00018523	XLOC_008830	LincRNAs identified by Cabili et al	716	chr10	-	58872622	58982557		CCCTGGATCTGTGAAATGTTCACCAAGACAGACAAATGTAGATGGATTTCAAACTTTTTG		intergenic							29.1082	10.7191	4.76884	3.12401
ASHGA5P034969	1.1116	up	noncoding	ENST00000414796	AC019064.1	GENCODE	494	chr2	-	35223344	35225227		CAGTGCCTGCCACAAAGTTAACACTATCTGTTCAATCCATACTGAAAGAAAAAATAAATG		intergenic							76.7493	65.9518	6.20776	6.05513
ASHGA5P023912	1.18655	up	noncoding	HMlincRNA921+	HMlincRNA921	LincRNAs identified by Khalil et al	20764	chr20	+	541348	562112		GAGTGACCCTCAACGCCTTTCTATGGTAACATACACATCTATTCATGAACTGTTCACACA		intergenic							280.936	209.491	8.13444	7.88767
ASHGA5P036277	2.08864	up	noncoding	ENST00000436616	AC009948.5	GENCODE	918	chr2	+	179278725	179298716		CCATATCTACAAGAACTATTTAGTTCTCAAAACTGGGAAGAAATGTTTCAGAGGCATCAT		intronic antisense	NM_001139517	PRKRA	interferon-inducible double stranded RNA-dependent protein kinase activator A isoform 2	-	179296140	179315484	353.029	152.278	8.45154	7.38898
ASHGA5P036277	2.08864	up	noncoding	ENST00000436616	AC009948.5	GENCODE	918	chr2	+	179278725	179298716		CCATATCTACAAGAACTATTTAGTTCTCAAAACTGGGAAGAAATGTTTCAGAGGCATCAT		intronic antisense	NM_001139518	PRKRA	interferon-inducible double stranded RNA-dependent protein kinase activator A isoform 3	-	179296140	179315355	353.029	152.278	8.45154	7.38898
ASHGA5P036277	2.08864	up	noncoding	ENST00000436616	AC009948.5	GENCODE	918	chr2	+	179278725	179298716		CCATATCTACAAGAACTATTTAGTTCTCAAAACTGGGAAGAAATGTTTCAGAGGCATCAT		intronic antisense	NM_003690	PRKRA	interferon-inducible double stranded RNA-dependent protein kinase activator A isoform 1	-	179296140	179315958	353.029	152.278	8.45154	7.38898
ASHGA5P035658	1.25414	up	noncoding	ENST00000439239	RP11-293P20.2	GENCODE	437	chr1	+	24367342	24413289		AAATTCCCTTGTCCTTTTTGGACAACTGGAAAGAAGGATGAGCGATGGTGGTGTCAGCAT		natural antisense	NM_152372	MYOM3	myomesin-3	-	24382530	24438665	45.9113	37.0143	5.44284	5.11613
ASHGA5P033428	1.16065	up	noncoding	ENST00000580897	RP11-498C9.12	GENCODE	563	chr17	+	79880774	79882387		GGAGCTAGGATCACTTCAGGAAATTATGGGCTGGGGGGCTTCTTACTCTCATCAGGGGAG		natural antisense	NM_002359	MAFG	transcription factor MafG	-	79876144	79885587	63.7257	54.1976	5.93516	5.72023
ASHGA5P033428	1.16065	up	noncoding	ENST00000580897	RP11-498C9.12	GENCODE	563	chr17	+	79880774	79882387		GGAGCTAGGATCACTTCAGGAAATTATGGGCTGGGGGGCTTCTTACTCTCATCAGGGGAG		natural antisense	NM_032711	MAFG	transcription factor MafG	-	79876144	79881444	63.7257	54.1976	5.93516	5.72023
ASHGA5P026321	1.05679	up	noncoding	ENST00000530379	RP11-375D13.2	GENCODE	555	chr11	+	41741992	41756304		AGTTGTGGCTCACTATCTGCAAAAGCTGCAGTTTTTGATATTCCAATCCCCAGTGGGGAA		intergenic							94.5388	83.8563	6.5214	6.44171
ASHGA5P057656	1.56658	up	noncoding	TCONS_00020465	XLOC_009798	LincRNAs identified by Cabili et al	417	chr12	+	69800946	69801567		TACTTGCAGGGATTAGCATATATTGAGGCTGGGAATTGTTTGCCATATCCCTATTTCCTG		intergenic							72.7195	46.6363	6.12629	5.47867
ASHGA5P031897	1.58966	up	noncoding	ENST00000563557	RP11-432I5.4	GENCODE	1018	chr16	+	71760877	71761895		GTCAGGGATCATCAGAATAACAGAAAACCTAAAGCTACCAACCTCCAAAACACAGAGTTG		intergenic							37.4274	24.8843	5.13721	4.46849
ASHGA5P057597	1.3585	up	noncoding	TCONS_00019507	XLOC_009306	LincRNAs identified by Cabili et al	324	chr11	+	121760050	121777195	TCONS_00019508	CTCACATCTGGAGCAAGAAGACAACTTAATTAAGAGACAGCATTTAATGACAAGGAAAGA		intergenic							37.2136	28.5308	5.12849	4.68648
ASHGA5P017156	1.33804	up	noncoding	uc003vbg.4	DPY19L2P2	UCSC_knowngene	4090	chr7	-	102815461	102920750		CACCCCAAACTTGGGAATAAACAAATAACCTATCAACTTGTAGAGATGGCAATAATTCTA	349152	intergenic							14.7472	12.7002	3.75961	3.33949
ASHGA5P031308	1.85972	up	noncoding	ENST00000454068	GAS5	GENCODE	688	chr1	-	173833048	173836953		GCATGCGTGACCTAAGCTGCGACTATGTTAGAGTAGAACTGCGGAGAAGCCTCGGCTCTC	60674	bidirectional	NM_001122770	ZBTB37	zinc finger and BTB domain-containing protein 37 isoform a	+	173837492	173855774	89.9909	48.8283	6.44501	5.54992
ASHGA5P031308	1.85972	up	noncoding	ENST00000454068	GAS5	GENCODE	688	chr1	-	173833048	173836953		GCATGCGTGACCTAAGCTGCGACTATGTTAGAGTAGAACTGCGGAGAAGCCTCGGCTCTC	60674	bidirectional	NM_032522	ZBTB37	zinc finger and BTB domain-containing protein 37 isoform b	+	173837492	173842778	89.9909	48.8283	6.44501	5.54992
ASHGA5P020203	1.42264	up	noncoding	NR_034138	LOC100144602	RefSeq	1198	chr4	+	66535678	66559104		CCAATAGAAGGCATTTTTAGTGATGTGTGGCCTCACCACTTAAATCCAGTTTATTGAATC	100144602	natural antisense	ENST00000273854	EPHA5	EPH receptor A5 [Source:HGNC Symbol;Acc:3389]	-	66185280	66536061	34.1853	25.3474	5.00553	4.49696
ASHGA5P020203	1.42264	up	noncoding	NR_034138	LOC100144602	RefSeq	1198	chr4	+	66535678	66559104		CCAATAGAAGGCATTTTTAGTGATGTGTGGCCTCACCACTTAAATCCAGTTTATTGAATC	100144602	natural antisense	ENST00000432638	EPHA5	EPH receptor A5 [Source:HGNC Symbol;Acc:3389]	-	66189112	66535778	34.1853	25.3474	5.00553	4.49696
ASHGA5P020203	1.42264	up	noncoding	NR_034138	LOC100144602	RefSeq	1198	chr4	+	66535678	66559104		CCAATAGAAGGCATTTTTAGTGATGTGTGGCCTCACCACTTAAATCCAGTTTATTGAATC	100144602	natural antisense	ENST00000511294	EPHA5	EPH receptor A5 [Source:HGNC Symbol;Acc:3389]	-	66196278	66536213	34.1853	25.3474	5.00553	4.49696
ASHGA5P057737	1.03233	up	noncoding	TCONS_00021327	XLOC_010097	LincRNAs identified by Cabili et al	781	chr12	-	57477786	57481646		CTGGCCACAGTTATTTGTGTCTTTGCCTCTGAGTTTTAGATCATACTAAGGATGTTGGAC		intergenic							131.354	116.963	7.0132	6.9673
ASHGA5P023383	1.16278	up	noncoding	ENST00000579836	RP11-1109M24.16	GENCODE	549	chr17	-	21771662	21792963		TTTCGAGAGTGTTTGAAATACTCTAAGACATTTTGGAGCTCTTGGGGCCTATAATGAAGA		intergenic							62.708	53.4529	5.91248	5.69491
ASHGA5P042800	1.06398	up	noncoding	uc021zos.1	X07060	UCSC_knowngene	388	chr6_mann_hap4	+	1205660	1206048	NM_001242758, NR_024240, uc003noi.3	CCTCAACTTCATGGTGCACTGAGCTGTAACTTCTTCCTTCCCTATTAAAATTAGAACCTG		exon sense-overlapping	NM_001242758	HLA-A	HLA class I histocompatibility antigen, A-1 alpha chain precursor	+	1202631	1206062	275817	252233	18.1031	18.0137
ASHGA5P042800	1.06398	up	noncoding	uc021zos.1	X07060	UCSC_knowngene	388	chr6_mann_hap4	+	1205660	1206048	NM_001242758, NR_024240, uc003noi.3	CCTCAACTTCATGGTGCACTGAGCTGTAACTTCTTCCTTCCCTATTAAAATTAGAACCTG		exon sense-overlapping	NM_002116	HLA-A	HLA class I histocompatibility antigen, A-1 alpha chain precursor	+	1202631	1206062	275817	252233	18.1031	18.0137
ASHGA5P023755	1.12201	up	noncoding	HMlincRNA193-	HMlincRNA193	LincRNAs identified by Khalil et al	6777	chr12	-	104543332	104550109		CCAGGAATGAATGAGTCAGTAGATTCTGCTGTAATTCCTACGGATGTCTCCGAATGAATG		intergenic							68.9525	59.6874	6.05086	5.88477
ASHGA5P045585	1.23962	up	noncoding	ENST00000442069	RP11-143M1.2	GENCODE	575	chr9	+	72715	75298	ENST00000416105, ENST00000416700, ENST00000416758, ENST00000420855, ENST00000429980, ENST00000433106, ENST00000446595, NR_015423, uc002tjx.4, uc003zfx.3	AGTGAACGCGTTGGGAACAATATGGAAAACTGGGAGCCGCCTTGGAATCTACAGGGCCGG		intergenic							88.2706	67.7946	6.41309	6.10319
ASHGA5P014780	1.13883	up	noncoding	ENST00000413311	AC093382.1	GENCODE	379	chr2	-	216804030	216806442		TTAATAAAAGGAAGAAGATACTAAAAATCTGTCAAACCCAGCAGTACTCAAGGCCTAGAG		intergenic							45.7028	40.2949	5.43699	5.24944
ASHGA5P046308	1.93878	up	noncoding	TCONS_00001546	XLOC_000889	LincRNAs identified by Cabili et al	1296	chr1	-	84542061	84543595		GTGGATGTAATATTTTGCCCCACATACATAGAAAGTTCAATGAATAGCACTGAACCACAT		intergenic							62.5061	33.4874	5.90775	4.9526
ASHGA5P036153	1.3048	up	noncoding	TCONS_00027726	XLOC_013297	LincRNAs identified by Cabili et al	733	chr19	-	32456552	32516685	TCONS_00027297	TATGATTTCATTCTCTGAAAGTGTTAACCAGGGTGCAGCATGGCCAGAAACCATTCCGAG		intergenic							34.7512	27.845	5.03106	4.64723
ASHGA5P023458	1.0817	up	noncoding	ENST00000581363	ANKRD20A5P	GENCODE	582	chr18	+	14179368	14205211		TTTTCCATGGTGAAAATATTGAAGCACTGGACAAGCAGTGTGTCCCCGAGAAAGTGTCAG	440482	intergenic							265.381	216.269	8.04787	7.93457
ASHGA5P049913	1.05485	up	noncoding	TCONS_00001279	XLOC_000566	LincRNAs identified by Cabili et al	444	chr1	+	219467415	219467990		GAGAGATGTCCTTGAACTCAATCTATCCTGAAGATGCTCCTGAGAGGGCAAACAAATAAC		intergenic							55.7138	52.2519	5.73753	5.66049
ASHGA5P031566	1.14574	up	noncoding	ENST00000547549	MIR3179-2	GENCODE	677	chr16	+	16394006	16394683	ENST00000546674	AGATGCCACCCATCTACATATTCTTTCAGATGCACAATATTTCACTGTGTGAATGAAACA	100422886	intergenic							571.999	422.794	9.1448	8.94852
ASHGA5P018739	1.38735	up	noncoding	ENST00000457113	AC008746.3	GENCODE	529	chr19	-	54941831	54945878		AATCAGCAGAAACGGCCTTCACCGAGTGCTAAGCACCTGCACAGCAGTCTCCTCCAAGGA		natural antisense	NM_001005367	TTYH1	protein tweety homolog 1 isoform 2	+	54926604	54947899	7223.45	4343.8	12.8241	12.3518
ASHGA5P018739	1.38735	up	noncoding	ENST00000457113	AC008746.3	GENCODE	529	chr19	-	54941831	54945878		AATCAGCAGAAACGGCCTTCACCGAGTGCTAAGCACCTGCACAGCAGTCTCCTCCAAGGA		natural antisense	NM_001201461	TTYH1	protein tweety homolog 1 isoform 3	+	54926604	54947899	7223.45	4343.8	12.8241	12.3518
ASHGA5P018739	1.38735	up	noncoding	ENST00000457113	AC008746.3	GENCODE	529	chr19	-	54941831	54945878		AATCAGCAGAAACGGCCTTCACCGAGTGCTAAGCACCTGCACAGCAGTCTCCTCCAAGGA		natural antisense	NM_020659	TTYH1	protein tweety homolog 1 isoform 1	+	54926604	54947899	7223.45	4343.8	12.8241	12.3518
ASHGA5P049094	1.04031	up	noncoding	TCONS_00023574	XLOC_011397	LincRNAs identified by Cabili et al	682	chr15	-	22541541	22542833		TTCCCCCCAGAAGTCGGCGTGGCTCAGCTCAGTCCAGTTCACAACAAATATGAAATCCCT		intergenic							511.157	415.865	8.9785	8.92149
ASHGA5P015665	1.06234	up	noncoding	ENST00000422353	AC012668.2	GENCODE	214	chr2	+	216397855	216486648		CTGACCCCAGAGGAAATTTGTTTTGCAACAGAAAACATAAGAAATTTTCCCTGCTTGGAA		intergenic							15.5765	16.2538	3.84276	3.75552
ASHGA5P057118	1.0611	up	noncoding	TCONS_00013474	XLOC_006122	LincRNAs identified by Cabili et al	829	chr7	+	63498205	63500337		ATAAGCCATTTTGGGAGCCACATCCACCACTTTTGTGACTCCCACACAGTTTTAATGGCT		intergenic							104.727	92.4895	6.67313	6.58758
ASHGA5P015934	1.23297	up	noncoding	ENST00000424968	LINC00240	GENCODE	507	chr6	+	26988231	26991703		ACATCAAACCTGTCACCCACCGGTCTGAAGAGGAGGATGAGAGACAAAGAAAAAAGTTGT		intergenic							267.954	193.306	8.06378	7.76164
ASHGA5P029407	2.11971	up	noncoding	ENST00000547175	RP11-597A11.2	GENCODE	1493	chr14	+	20149578	20152898		AAACAGAAGCAGCTTTTTTAAAAAGCTAAAGTGTACTATAGTTCAGTAAGGTGTCCACTG		intergenic							131.952	61.4889	7.02062	5.93675
ASHGA5P043398	1.35444	up	noncoding	ENST00000424019	FAM58BP	pseudogene	988	chr1	+	200182655	200183643		GGAGAGGACGCCAGAGAGGGTGCCGCAGCGCCGGCAGCCAGGGTGCACTTCCGCGTGGCG									15.6516	13.2124	3.84938	3.41169
ASHGA5P057685	2.52797	up	noncoding	TCONS_00020727	XLOC_010026	LincRNAs identified by Cabili et al	210	chr12	-	20258600	20262742	TCONS_00020726, TCONS_00021293	TGTTATTATGGAAGCCTGGATCCAACTTTTGAAGGATAAGAGATTTCACAGATCATTGAT		intergenic							35.191	15.7785	5.04756	3.70958
ASHGA5P020202	1.7003	up	noncoding	ENST00000509470	RP11-768F21.1	GENCODE	695	chr12	-	119825795	120032306		TTCTTCATTGTGGCAGGTGTATGTGTGAGTTTGCAGCTCAATCCTGGCCAAGGGGATCCA		intronic antisense	NM_001136534	TMEM233	transmembrane protein 233	+	120031263	120079363	463.145	236.762	8.8377	8.0719
ASHGA5P020202	1.7003	up	noncoding	ENST00000509470	RP11-768F21.1	GENCODE	695	chr12	-	119825795	120032306		TTCTTCATTGTGGCAGGTGTATGTGTGAGTTTGCAGCTCAATCCTGGCCAAGGGGATCCA		intronic antisense	NM_178499	CCDC60	coiled-coil domain-containing protein 60	+	119772516	119978852	463.145	236.762	8.8377	8.0719
ASHGA5P049163	1.04708	up	noncoding	NR_037608	SLX1A-SULT1A3	RefSeq	2218	chr16	+	30205753	30215650		GGTGATGATCCAGGCTGGGTTCCAGCATAGGGCTCTTGGTGGGCACGCTGGGGTCGGGTG	100526830	exon sense-overlapping	NM_001014999	SLX1A	structure-specific endonuclease subunit SLX1 isoform 1	+	30205163	30208887	133.402	117.184	7.03676	6.97038
ASHGA5P049163	1.04708	up	noncoding	NR_037608	SLX1A-SULT1A3	RefSeq	2218	chr16	+	30205753	30215650		GGTGATGATCCAGGCTGGGTTCCAGCATAGGGCTCTTGGTGGGCACGCTGGGGTCGGGTG	100526830	exon sense-overlapping	NM_001015000	SLX1A	structure-specific endonuclease subunit SLX1 isoform 2	+	30205163	30208887	133.402	117.184	7.03676	6.97038
ASHGA5P049163	1.04708	up	noncoding	NR_037608	SLX1A-SULT1A3	RefSeq	2218	chr16	+	30205753	30215650		GGTGATGATCCAGGCTGGGTTCCAGCATAGGGCTCTTGGTGGGCACGCTGGGGTCGGGTG	100526830	exon sense-overlapping	NM_001017390	SULT1A4	sulfotransferase 1A3/1A4	+	30210548	30215650	133.402	117.184	7.03676	6.97038
ASHGA5P049163	1.04708	up	noncoding	NR_037608	SLX1A-SULT1A3	RefSeq	2218	chr16	+	30205753	30215650		GGTGATGATCCAGGCTGGGTTCCAGCATAGGGCTCTTGGTGGGCACGCTGGGGTCGGGTG	100526830	exon sense-overlapping	NM_024044	SLX1B	structure-specific endonuclease subunit SLX1 isoform 1	+	30205163	30208887	133.402	117.184	7.03676	6.97038
ASHGA5P049163	1.04708	up	noncoding	NR_037608	SLX1A-SULT1A3	RefSeq	2218	chr16	+	30205753	30215650		GGTGATGATCCAGGCTGGGTTCCAGCATAGGGCTCTTGGTGGGCACGCTGGGGTCGGGTG	100526830	exon sense-overlapping	NM_177552	SULT1A3	sulfotransferase 1A3/1A4	+	30210548	30215650	133.402	117.184	7.03676	6.97038
ASHGA5P049163	1.04708	up	noncoding	NR_037608	SLX1A-SULT1A3	RefSeq	2218	chr16	+	30205753	30215650		GGTGATGATCCAGGCTGGGTTCCAGCATAGGGCTCTTGGTGGGCACGCTGGGGTCGGGTG	100526830	exon sense-overlapping	NM_178044	SLX1B	structure-specific endonuclease subunit SLX1 isoform 2	+	30205163	30208887	133.402	117.184	7.03676	6.97038
ASHGA5P058520	1.82132	up	noncoding	uc009vjs.1	AK310350	UCSC_knowngene	673	chr1	+	995082	997436		CCTTTTGAAGATGTTAGGAAAGACGTGCTGCTGACTTTGCAAACGGAGGTGCTGAAACCG		intergenic							54.7219	31.3723	5.70979	4.84481
ASHGA5P019174	1.28038	up	noncoding	uc010kry.1	AK310146	UCSC_knowngene	1849	chr7	+	149743	154868		AGGAAGCTGGAAGTTTGGCTGCTGTAACTGACTGGGAAGCTTAAAATAACAGACAATCAT		intergenic							31.2022	25.4893	4.86419	4.50762
ASHGA5P042817	1.07199	up	noncoding	TCONS_00019360	XLOC_009185	LincRNAs identified by Cabili et al	1581	chr11	+	68049234	68052321		TACACACAAGTATTTCTCTTCCTGAGCTTCAAGGAGACTCTGCATTCAAAAGACCACTCC		intergenic							78.2476	69.2944	6.23778	6.13748
ASHGA5P041104	11.5095	up	noncoding	ENST00000513392	CTD-2023N9.2	GENCODE	409	chr5	+	56869853	56910168		GATGACGCTGTGTTTCAGAGGAATTCATAAGCAGAATTGAATTTGTTTTAGTTAACTCCT		intergenic							154.152	15.9723	7.25109	3.72633
ASHGA5P053098	1.03064	up	noncoding	uc003tuh.3	CCT6P1	UCSC_knowngene	1675	chr7	+	65216091	65228662	NR_003110, uc003tui.3	TTTCTTTTCTTCCTCTGGAGCAGTTATGGCGGCGGCGAAGACCCTGAACCCCAAGGCCAA	643253	intergenic							644.893	525.638	9.31625	9.27271
ASHGA5P022746	1.2167	up	noncoding	ENST00000561980	RP11-830F9.7	GENCODE	531	chr16	-	89003186	89004164		CCCGACGCGGGCCGGGACCTTCCTTTCAGCGGAGCCCAGGCCGTGCTGCGGGAAACAGCC		intron sense-overlapping	NM_005187	CBFA2T3	protein CBFA2T3 isoform 1	-	88941262	89043504	204.201	151.876	7.66782	7.38485
ASHGA5P022746	1.2167	up	noncoding	ENST00000561980	RP11-830F9.7	GENCODE	531	chr16	-	89003186	89004164		CCCGACGCGGGCCGGGACCTTCCTTTCAGCGGAGCCCAGGCCGTGCTGCGGGAAACAGCC		intron sense-overlapping	NM_175931	CBFA2T3	protein CBFA2T3 isoform 2	-	88941262	89007608	204.201	151.876	7.66782	7.38485
ASHGA5P018698	1.18943	up	noncoding	NR_036543	PPIE	RefSeq	4384	chr1	+	40204516	40222441	NR_036544	AGCGCGTCTTGTGGACTGGCAGAGGAAGTGGACGACAAAGTTCTTCATGCTGCGTTCATT	10450	exon sense-overlapping	NM_001195007	PPIE	peptidyl-prolyl cis-trans isomerase E isoform 4	+	40204516	40229586	456.859	330.485	8.82097	8.5707
ASHGA5P018698	1.18943	up	noncoding	NR_036543	PPIE	RefSeq	4384	chr1	+	40204516	40222441	NR_036544	AGCGCGTCTTGTGGACTGGCAGAGGAAGTGGACGACAAAGTTCTTCATGCTGCGTTCATT	10450	exon sense-overlapping	NM_006112	PPIE	peptidyl-prolyl cis-trans isomerase E isoform 1	+	40204516	40222441	456.859	330.485	8.82097	8.5707
ASHGA5P018698	1.18943	up	noncoding	NR_036543	PPIE	RefSeq	4384	chr1	+	40204516	40222441	NR_036544	AGCGCGTCTTGTGGACTGGCAGAGGAAGTGGACGACAAAGTTCTTCATGCTGCGTTCATT	10450	exon sense-overlapping	NM_203456	PPIE	peptidyl-prolyl cis-trans isomerase E isoform 2	+	40204516	40229586	456.859	330.485	8.82097	8.5707
ASHGA5P054639	1.00225	up	noncoding	ENST00000534742	RP11-326C3.2	GENCODE	812	chr11	+	288037	288987		GAGTCTCGCTGGCCTCGGAGCGCCCCCGAGCCCTCGGGCGACAGCGAGGCGAGGACCCAG		intergenic							74.7601	70.5141	6.16668	6.16343
ASHGA5P035268	1.00388	up	noncoding	TCONS_00004392	XLOC_002275	LincRNAs identified by Cabili et al	570	chr2	-	113402608	113403284		TTAATTTCTCCGTGGCTGACCTGTGTTTGTAACGCCGCAGCTGTTGCGAGGGGGAAGGAC		intergenic							1268.05	1032.48	10.2891	10.2836
ASHGA5P022617	4.87737	up	noncoding	ENST00000559779	RP11-430B1.2	GENCODE	908	chr15	+	52472289	52497531		TTGGCCGCAGAGAATGAGAAGGCAGATCAAAGTTACAGATGCTGCGAGAACATCGCCAAG		intronic antisense	NM_016194	GNB5	guanine nucleotide-binding protein subunit beta-5 isoform b	-	52413122	52483565	40.3792	9.493	5.25255	2.96645
ASHGA5P022617	4.87737	up	noncoding	ENST00000559779	RP11-430B1.2	GENCODE	908	chr15	+	52472289	52497531		TTGGCCGCAGAGAATGAGAAGGCAGATCAAAGTTACAGATGCTGCGAGAACATCGCCAAG		natural antisense	NM_018728	MYO5C	unconventional myosin-Vc	-	52484514	52587995	40.3792	9.493	5.25255	2.96645
ASHGA5P021503	1.24746	up	noncoding	NR_034101	LOC100288346	RefSeq	713	chr11	-	113140253	113144623		CAGGCCTGAGGAATGACCCCAAAGGAGCCCTGCATTAGAGCACACTGGGTTCATAGTTTA	100288346	natural antisense	NM_000615	NCAM1	neural cell adhesion molecule 1 isoform 1 precursor	+	112831968	113149158	53.2563	43.0028	5.66763	5.34864
ASHGA5P021503	1.24746	up	noncoding	NR_034101	LOC100288346	RefSeq	713	chr11	-	113140253	113144623		CAGGCCTGAGGAATGACCCCAAAGGAGCCCTGCATTAGAGCACACTGGGTTCATAGTTTA	100288346	natural antisense	NM_001242607	NCAM1	neural cell adhesion molecule 1 isoform 5 precursor	+	112831968	113149158	53.2563	43.0028	5.66763	5.34864
ASHGA5P021503	1.24746	up	noncoding	NR_034101	LOC100288346	RefSeq	713	chr11	-	113140253	113144623		CAGGCCTGAGGAATGACCCCAAAGGAGCCCTGCATTAGAGCACACTGGGTTCATAGTTTA	100288346	natural antisense	NM_181351	NCAM1	neural cell adhesion molecule 1 isoform 2 precursor	+	112831968	113149158	53.2563	43.0028	5.66763	5.34864
ASHGA5P052532	1.80406	up	noncoding	ENST00000504756	RP11-423H2.1	GENCODE	489	chr5	+	177309391	177310001		CTTTAGACAAGTATGTTTCTGTTTTGACTGTCACTGCCAGGTGGTGAGGAAGCAAAGAGT		intergenic							123.755	66.8737	6.92769	6.07644
ASHGA5P037246	1.45879	up	noncoding	ENST00000430001	AF124730.4	GENCODE	327	chr21	-	30554347	30560116		CTGCTCATAATGCTGGTCCTAAACACCTTAATCCAAAAGCAGCCAATAAAAAGTTTTTAA		intergenic							56.0684	39.1749	5.74789	5.20311
ASHGA5P056698	1.0436	up	noncoding	TCONS_00007943	XLOC_003411	LincRNAs identified by Cabili et al	1968	chr4	+	570751	611965		TCATTCAGTCCTTGCGGCACACGAAGGACAAGTCCCAGGTGGCCTTGGAATGAACAAGCC		intergenic							32.708	31.9382	4.93575	4.87418
ASHGA5P051739	1.06234	up	noncoding	ENST00000440084	RP11-277L2.2	GENCODE	2102	chr1	+	149576160	149641425	ENST00000414344, ENST00000426301, ENST00000430014, ENST00000434047, ENST00000440862	CGTCCCCGGCACCCTCGGTCCCCCACGGCGGTTGGTCCGGGCGGGGGAAGGAGAAAGTGA		intergenic							1361.77	1048.99	10.3928	10.3056
ASHGA5P019225	1.7648	up	noncoding	NR_027762	RBM34	RefSeq	1733	chr1	-	235294497	235324571		TGTGCCTAAAGGAAAGCGCTCTAGCGAGTGCTGATTTAGAAGAAGAAATTCACCAGAAAC	23029	exon sense-overlapping	NM_001161533	RBM34	RNA-binding protein 34 isoform 2	-	235315802	235324571	248.749	129.913	7.9534	7.13389
ASHGA5P019225	1.7648	up	noncoding	NR_027762	RBM34	RefSeq	1733	chr1	-	235294497	235324571		TGTGCCTAAAGGAAAGCGCTCTAGCGAGTGCTGATTTAGAAGAAGAAATTCACCAGAAAC	23029	exon sense-overlapping	NM_015014	RBM34	RNA-binding protein 34 isoform 1	-	235294497	235324571	248.749	129.913	7.9534	7.13389
ASHGA5P055674	1.31264	up	noncoding	ENST00000457856	RP11-108M9.3	GENCODE	475	chr1	+	17199533	17200587		ATATCTCAACCAGAAAGACTGCAATAAATACATTATTTCATTCGTGGAAGGTACAGACCA		bidirectional	ENST00000356370	BX284668.1	Uncharacterized protein [Source:UniProtKB/TrEMBL;Acc:H9KV52]	-	17196253	17198668	563.503	364.665	9.1203	8.72782
ASHGA5P032290	1.90314	up	noncoding	ENST00000577850	CTB-96E2.7	GENCODE	1121	chr17	-	26688622	26689881		TATGGAGAAAGCTGGTGATCAGTTTGTACATATGGACAAGTTCAAGGCAGTATGGTCTAC		natural antisense	NM_152464	TMEM199	transmembrane protein 199	+	26684686	26689089	22.5182	13.7106	4.40032	3.47193
ASHGA5P048829	1.51834	up	noncoding	NR_033688	PEF1	RefSeq	1838	chr1	-	32095462	32110218		CGAGGATTTGGGGACCTTGGACCCCACAGGTCCAGGCTGGCGCTGGCCTGGGCTCCACAG	553115	exon sense-overlapping	NM_012392	PEF1	peflin	-	32095462	32110838	28.9536	20.6103	4.76193	4.15944
ASHGA5P022187	1.06327	up	noncoding	NR_046160	LOC256021	RefSeq	2207	chr12	-	92378751	92536447	NR_046159	TTAAAAATATCACCCGGCCCAGCAAAAAGTTTGGAAACCTTCATCTAGAAAGTGGTCTAG	256021	exon sense-overlapping	NM_001256373	LOC256021	uncharacterized protein LOC256021 isoform 1	-	92378751	92536447	221.289	185.403	7.78563	7.69712
ASHGA5P022187	1.06327	up	noncoding	NR_046160	LOC256021	RefSeq	2207	chr12	-	92378751	92536447	NR_046159	TTAAAAATATCACCCGGCCCAGCAAAAAGTTTGGAAACCTTCATCTAGAAAGTGGTCTAG	256021	exon sense-overlapping	NM_001256374	LOC256021	uncharacterized protein LOC256021 isoform 2	-	92378751	92536447	221.289	185.403	7.78563	7.69712
ASHGA5P022187	1.06327	up	noncoding	NR_046160	LOC256021	RefSeq	2207	chr12	-	92378751	92536447	NR_046159	TTAAAAATATCACCCGGCCCAGCAAAAAGTTTGGAAACCTTCATCTAGAAAGTGGTCTAG	256021	exon sense-overlapping	NM_001256375	LOC256021	uncharacterized protein LOC256021 isoform 3	-	92378751	92536447	221.289	185.403	7.78563	7.69712
ASHGA5P022187	1.06327	up	noncoding	NR_046160	LOC256021	RefSeq	2207	chr12	-	92378751	92536447	NR_046159	TTAAAAATATCACCCGGCCCAGCAAAAAGTTTGGAAACCTTCATCTAGAAAGTGGTCTAG	256021	exon sense-overlapping	NM_001731	BTG1	protein BTG1	-	92534053	92539673	221.289	185.403	7.78563	7.69712
ASHGA5P017994	1.34875	up	noncoding	ENST00000448063	AP000470.2	GENCODE	693	chr21	-	25527483	25560655		GTACATGTTGTTTCTCCTAGATCGTGTTTCCTGAGAAGCAAATTTTGAGATGGTTTTGAG		intergenic							524.018	333.345	9.01647	8.58485
ASHGA5P026319	1.14789	up	noncoding	ENST00000530102	RP11-64I17.1	GENCODE	460	chr11	+	38670313	38688407		CACAGAACTTTCATTTGATCTTATCTTTCGCTGTCACACACATCGACCTGCATTTTCTTT		intergenic							84.1466	69.3916	6.33932	6.14033
ASHGA5P030111	1.12583	up	noncoding	ENST00000559285	RP11-502I4.1	GENCODE	928	chr15	-	67713546	67813287		GGTGAAAGGACACATGCATTTTGTTTGACTTGGGCTCAGATTCTGCATCTGCCATGTCTT		natural antisense	NM_001031715	IQCH	IQ domain-containing protein H isoform 1	+	67547137	67794142	83.1131	69.8474	6.32133	6.15034
ASHGA5P018055	1.88275	up	noncoding	ENST00000448897	RP11-149I23.3	GENCODE	232	chr10	+	91043555	91051882		CGACCATGAGGCTCTAGGGGATGGTAGAGTCACAGGATGGAAGAACTCTGTGTCCTTGAA		intronic antisense	ENST00000282673	LIPA	lipase A, lysosomal acid, cholesterol esterase [Source:HGNC Symbol;Acc:6617]	-	90984865	91102461	33.0044	19.215	4.94849	4.03565
ASHGA5P018055	1.88275	up	noncoding	ENST00000448897	RP11-149I23.3	GENCODE	232	chr10	+	91043555	91051882		CGACCATGAGGCTCTAGGGGATGGTAGAGTCACAGGATGGAAGAACTCTGTGTCCTTGAA		intronic antisense	ENST00000371829	LIPA	lipase A, lysosomal acid, cholesterol esterase [Source:HGNC Symbol;Acc:6617]	-	90973327	91102472	33.0044	19.215	4.94849	4.03565
ASHGA5P018055	1.88275	up	noncoding	ENST00000448897	RP11-149I23.3	GENCODE	232	chr10	+	91043555	91051882		CGACCATGAGGCTCTAGGGGATGGTAGAGTCACAGGATGGAAGAACTCTGTGTCCTTGAA		intronic antisense	ENST00000371837	LIPA	lipase A, lysosomal acid, cholesterol esterase [Source:HGNC Symbol;Acc:6617]	-	90973325	91174314	33.0044	19.215	4.94849	4.03565
ASHGA5P018055	1.88275	up	noncoding	ENST00000448897	RP11-149I23.3	GENCODE	232	chr10	+	91043555	91051882		CGACCATGAGGCTCTAGGGGATGGTAGAGTCACAGGATGGAAGAACTCTGTGTCCTTGAA		intronic antisense	ENST00000425287	LIPA	lipase A, lysosomal acid, cholesterol esterase [Source:HGNC Symbol;Acc:6617]	-	90973337	91174382	33.0044	19.215	4.94849	4.03565
ASHGA5P018055	1.88275	up	noncoding	ENST00000448897	RP11-149I23.3	GENCODE	232	chr10	+	91043555	91051882		CGACCATGAGGCTCTAGGGGATGGTAGAGTCACAGGATGGAAGAACTCTGTGTCCTTGAA		intronic antisense	ENST00000541980	LIPA	lipase A, lysosomal acid, cholesterol esterase [Source:HGNC Symbol;Acc:6617]	-	90973327	91095301	33.0044	19.215	4.94849	4.03565
ASHGA5P029623	1.61029	up	noncoding	ENST00000559968	RP11-643G16.4	GENCODE	1698	chr14	+	68081645	68083343		ATATGGGATGGTAGCTTTACATCTTCAGTTGTCTCTGATGCAGCTTATATGAAATAATTG		intergenic							36073.7	19088.5	15.0895	14.4022
ASHGA5P052018	1.56606	up	noncoding	uc003hws.1	AK093356	UCSC_knowngene	827	chr4	+	103749290	103765255		CACCTAGAACAGCAACCATAATTGGCATCCCTACCTAATTAAAGTTTGCAGTCCACTGTC		intronic antisense	NM_181890	UBE2D3	ubiquitin-conjugating enzyme E2 D3 isoform 1	-	103717132	103790032	514.131	283.011	8.98812	8.34098
ASHGA5P052018	1.56606	up	noncoding	uc003hws.1	AK093356	UCSC_knowngene	827	chr4	+	103749290	103765255		CACCTAGAACAGCAACCATAATTGGCATCCCTACCTAATTAAAGTTTGCAGTCCACTGTC		intronic antisense	NM_181893	UBE2D3	ubiquitin-conjugating enzyme E2 D3 isoform 3	-	103717132	103790003	514.131	283.011	8.98812	8.34098
ASHGA5P052018	1.56606	up	noncoding	uc003hws.1	AK093356	UCSC_knowngene	827	chr4	+	103749290	103765255		CACCTAGAACAGCAACCATAATTGGCATCCCTACCTAATTAAAGTTTGCAGTCCACTGTC		natural antisense	NM_181889	UBE2D3	ubiquitin-conjugating enzyme E2 D3 isoform 1	-	103717132	103749307	514.131	283.011	8.98812	8.34098
ASHGA5P049113	1.79444	up	noncoding	ENST00000523028	RP11-645C24.2	pseudogene	4131	chr16	-	21890658	21927345	ENST00000309865, ENST00000529428, ENST00000568855, NM_015092, NR_027155	TTTCTCAATTATATTAAATCTTCTGGGAATGTTACTTAAGAAAGATAACCAGGACACGAG									409.157	200.334	8.66213	7.81859
ASHGA5P058254	1.20517	up	noncoding	TCONS_00028622	XLOC_013658	LincRNAs identified by Cabili et al	629	chr20	-	12915531	12916496		ACCACCTGGAGTGAAGCTCAGGATTTGCCAGCCAGAACTTTGGCCTACCTGTCAGTCCTG		intergenic							83.9228	66.3806	6.33418	6.06494
ASHGA5P026633	1.06806	up	noncoding	ENST00000535936	RP11-707G14.7	GENCODE	383	chr11	+	73639577	73641417		TTTTATTTATTTAACGGAGGAAGGTCATTTCTGGCTGGGGTAATAATGTTGTTGACAGAG		intergenic							40.0339	37.6959	5.23878	5.14379
ASHGA5P045086	1.2385	up	noncoding	ENST00000528668	CTD-3232M19.2	pseudogene	3778	chr8	+	145462708	145485883	NM_032450	CTGGGGACCAAACCCAAGCCCTTCAGTGAGGGATGTGCCCAATAAACTCATCTGCTCCCA									15773.2	10893.8	13.9218	13.6132
ASHGA5P030486	1.08325	up	noncoding	uc001zol.3	BC045779	UCSC_knowngene	1610	chr15	+	42100588	42102743		TTCCTATTCGCAGTCTCCAGGCTTGCTCTTGTCTGCTATTTCCAGTGCTAATGAAGAGTT		intron sense-overlapping	NM_001128608	MAPKBP1	mitogen-activated protein kinase-binding protein 1 isoform b	+	42066631	42120053	2712.26	2061.01	11.3953	11.2799
ASHGA5P030486	1.08325	up	noncoding	uc001zol.3	BC045779	UCSC_knowngene	1610	chr15	+	42100588	42102743		TTCCTATTCGCAGTCTCCAGGCTTGCTCTTGTCTGCTATTTCCAGTGCTAATGAAGAGTT		intron sense-overlapping	NM_001265611	MAPKBP1	mitogen-activated protein kinase-binding protein 1 isoform c	+	42066631	42120053	2712.26	2061.01	11.3953	11.2799
ASHGA5P030486	1.08325	up	noncoding	uc001zol.3	BC045779	UCSC_knowngene	1610	chr15	+	42100588	42102743		TTCCTATTCGCAGTCTCCAGGCTTGCTCTTGTCTGCTATTTCCAGTGCTAATGAAGAGTT		intron sense-overlapping	NM_014994	MAPKBP1	mitogen-activated protein kinase-binding protein 1 isoform a	+	42066631	42120053	2712.26	2061.01	11.3953	11.2799
ASHGA5P045014	1.06017	up	noncoding	ENST00000522815	RP11-136O12.2	GENCODE	630	chr8	+	126479180	126553615		ATAAACCACTGAAGAAGAATGCTGTGTATCTATCTAGTGGGGCCTTCTAGGGAACTACGG		intergenic							48.1807	45.3455	5.51509	5.4308
ASHGA5P011473	1.01339	up	noncoding	NR_034124	LOC284751	RefSeq	2278	chr20	+	48909256	48931456		TACAATTTTCTGAAGCACCAGTTAGCCCAGATGCTTCTCATCTTTGGAGTTGAGCTGCAG	284751	intergenic							208.174	183.006	7.69688	7.67769
ASHGA5P047099	1.8799	up	noncoding	TCONS_00015148	XLOC_007191	LincRNAs identified by Cabili et al	772	chr8	-	118750471	118753715		AAATATCTGGGAGATGACCTGTACTGGGTATTCTCTCAGGCTGACTAAAGTGTCCACATG		intergenic							30.5489	17.9731	4.83904	3.92838
ASHGA5P056975	3.35225	up	noncoding	TCONS_00011716	XLOC_005194	LincRNAs identified by Cabili et al	2001	chr6	+	20321340	20333471		ACTTAAAACGAATGGAAGGCCAAGGAGATGAAATGGAAGACTTTGGACAGAACTTCTGGG		intergenic							20.463	6.25685	4.25372	2.50859
ASHGA5P033872	1.09829	up	noncoding	ENST00000446347	RP11-978I15.10	GENCODE	481	chr1	-	247729209	247803505		AGAAAACCTCCTCTGACTATAATGCCCATGGAAAATCATCTTAATTCCAGAAAGCGGGGG		intronic antisense	NM_001001914	OR2G3	olfactory receptor 2G3	+	247768887	247769817	99.5287	84.9484	6.59641	6.46116
ASHGA5P033872	1.09829	up	noncoding	ENST00000446347	RP11-978I15.10	GENCODE	481	chr1	-	247729209	247803505		AGAAAACCTCCTCTGACTATAATGCCCATGGAAAATCATCTTAATTCCAGAAAGCGGGGG		intronic antisense	NM_001001915	OR2G2	olfactory receptor 2G2	+	247751661	247752615	99.5287	84.9484	6.59641	6.46116
ASHGA5P033872	1.09829	up	noncoding	ENST00000446347	RP11-978I15.10	GENCODE	481	chr1	-	247729209	247803505		AGAAAACCTCCTCTGACTATAATGCCCATGGAAAATCATCTTAATTCCAGAAAGCGGGGG		natural antisense	NM_145278	C1orf150	putative uncharacterized protein C1orf150	+	247712450	247739848	99.5287	84.9484	6.59641	6.46116
ASHGA5P035783	1.54224	up	noncoding	ENST00000412797	RP11-70P17.1	GENCODE	483	chr1	+	25907968	25916847		ATTTGAGGAGTGGGACCGGCAGAGCTGGATGAAACCTGACTATGCTGAAGGGGAAATGGA		intergenic							21.4881	15.7142	4.32793	3.7029
ASHGA5P032896	1.95243	up	noncoding	ENST00000513672	RP4-559A3.6	GENCODE	342	chr1	-	226124110	226125257		CCCAACCTCTAGGGCGCAAGACTATAATAGTTAAATTTATATAGATGAGGCTTTCATTTA		exon sense-overlapping	NM_001172425	LEFTY2	left-right determination factor 2 isoform 2 preproprotein	-	226124297	226129083	26.9084	15.613	4.65827	3.69301
ASHGA5P032896	1.95243	up	noncoding	ENST00000513672	RP4-559A3.6	GENCODE	342	chr1	-	226124110	226125257		CCCAACCTCTAGGGCGCAAGACTATAATAGTTAAATTTATATAGATGAGGCTTTCATTTA		exon sense-overlapping	NM_003240	LEFTY2	left-right determination factor 2 isoform 1 preproprotein	-	226124297	226129083	26.9084	15.613	4.65827	3.69301
ASHGA5P058745	2.40781	up	noncoding	uc.316-	uc.316	UCR	240	chr10	-	126905564	126905804		TGACAGCTTTCTTCTAACCTAACAACTGGCATGCCTCATTTGCATATTAATGAGAAAACC		intergenic							109.933	46.7788	6.75111	5.48339
ASHGA5P030040	1.13183	up	noncoding	ENST00000561159	RP11-56B16.3	GENCODE	822	chr15	-	52206914	52207768		GTAGAAAAGGGAGTAAAACCTCATATATATAGATTCTAAGAGGTGTCTGTCTTACGAATG		intergenic							31.8229	29.0667	4.8945	4.71585
ASHGA5P031045	1.32605	up	noncoding	ENST00000565783	RP11-673P17.2	GENCODE	499	chr16	-	27078248	27079179		TTTTCTGGGAGACTCTGGCTGCTGGAGAGGATTCTCACAAAGGCATGCACACCTGGGCAG		natural antisense	NM_001145545	C16orf82	protein TNT	+	27078218	27080487	2173.06	1349.11	11.0796	10.6725
ASHGA5P040746	1.70259	up	noncoding	uc003lin.3	BC016751	UCSC_knowngene	581	chr5	-	140479828	140481794		GTTGACGCTACTGGAGGAGTTTCTCATGTTATATGAATTAAATAAATGCAATCTAGGGAA		natural antisense	NM_018937	PCDHB3	protocadherin beta-3 precursor	+	140480233	140483406	63.5939	38.2523	5.93195	5.16422
ASHGA5P037778	1.62041	up	noncoding	ENST00000414726	AP000525.10	pseudogene	313	chr22	+	16171459	16172116		TTTGAAGGTGCTGTGATTCAAACTGTCAGCGAGATAAGGCAGCAGATCAAGAAAGCACTC									37.3619	24.4461	5.13463	4.43827
ASHGA5P031147	1.00813	up	noncoding	TCONS_00006102	XLOC_002713	LincRNAs identified by Cabili et al	517	chr3	+	78101913	78114598		GTAGGATGTCTGCCTCTAACCTGTGGAATATTCCACCTTCTTCTTTTCATCTGCCCCAAA		intergenic							271.578	236.543	8.08183	8.07014
ASHGA5P023735	1.04879	up	noncoding	HMlincRNA1623-	HMlincRNA1623	LincRNAs identified by Khalil et al	5420	chrX	-	136668177	136673597		TAAAACTACCCTTCTACTTTACAATCTATGTTCAATTTCTAGCCCACCACCTGGCAGTAT		intergenic							287.736	241.714	8.16947	8.10074
ASHGA5P019308	1.44087	up	noncoding	NR_036462	APITD1	RefSeq	1431	chr1	+	10490803	10502872		GAAAAGTTGCAAGAACACGAGGCTAAAGGCAGCAGTTCACTATACTGTGGGTTGTCTTTG	378708	exon sense-overlapping	NM_001243768	APITD1-CORT	APITD1-CORT protein isoform 3	+	10490803	10512060	664.415	392.384	9.35647	8.82953
ASHGA5P019308	1.44087	up	noncoding	NR_036462	APITD1	RefSeq	1431	chr1	+	10490803	10502872		GAAAAGTTGCAAGAACACGAGGCTAAAGGCAGCAGTTCACTATACTGTGGGTTGTCTTTG	378708	exon sense-overlapping	NM_001270517	APITD1-CORT	APITD1-CORT protein isoform 4	+	10490158	10512060	664.415	392.384	9.35647	8.82953
ASHGA5P019308	1.44087	up	noncoding	NR_036462	APITD1	RefSeq	1431	chr1	+	10490803	10502872		GAAAAGTTGCAAGAACACGAGGCTAAAGGCAGCAGTTCACTATACTGTGGGTTGTCTTTG	378708	exon sense-overlapping	NM_198544	APITD1-CORT	APITD1-CORT protein isoform 1	+	10490158	10512060	664.415	392.384	9.35647	8.82953
ASHGA5P019308	1.44087	up	noncoding	NR_036462	APITD1	RefSeq	1431	chr1	+	10490803	10502872		GAAAAGTTGCAAGAACACGAGGCTAAAGGCAGCAGTTCACTATACTGTGGGTTGTCTTTG	378708	exon sense-overlapping	NM_199006	APITD1-CORT	APITD1-CORT protein isoform 2	+	10490158	10512060	664.415	392.384	9.35647	8.82953
ASHGA5P019308	1.44087	up	noncoding	NR_036462	APITD1	RefSeq	1431	chr1	+	10490803	10502872		GAAAAGTTGCAAGAACACGAGGCTAAAGGCAGCAGTTCACTATACTGTGGGTTGTCTTTG	378708	exon sense-overlapping	NM_199294	APITD1	centromere protein S	+	10490158	10502872	664.415	392.384	9.35647	8.82953
ASHGA5P033084	1.00867	up	noncoding	TCONS_00028182	XLOC_013541	LincRNAs identified by Cabili et al	1447	chr20	+	46421065	46428516		ACAGGTGACACTGGGTGACTCAGATCTTCTTGCCATAACATGGAGACACATGGTTAGAAA		intergenic							61.3885	59.0939	5.8825	5.87004
ASHGA5P025827	1.75227	up	noncoding	NR_038308	LOC100505702	RefSeq	4080	chr4	+	79567147	79605655		AATGGTCTAAAATTCTGGAGGAAAGTGGCTCTGGGAATTGAACAGTGGCTCAGTGATGTT	100505702	intergenic							146.777	80.3626	7.18248	6.37326
ASHGA5P026521	1.56697	up	noncoding	ENST00000534505	RP11-770G2.2	GENCODE	464	chr11	+	65513199	65539056		CAAAATATTGTCTTCCCATTCCATTGAAGGTTCAGAGGCCTCAGTGTCCAAGGGAGAATG		intergenic							1070.79	575.688	10.0576	9.4096
ASHGA5P034653	1.16823	up	noncoding	ENST00000454104	RP11-84A14.5	GENCODE	424	chr1	+	9908375	9910212		ACAAACCCCAAATGTGAAGGCAGCAGCAAGTTCTTTGTGTAATAAATATTGCAAAGCGCA		natural antisense	NM_001012329	CTNNBIP1	beta-catenin-interacting protein 1	-	9908333	9970316	74.3259	61.3454	6.15681	5.93248
ASHGA5P034653	1.16823	up	noncoding	ENST00000454104	RP11-84A14.5	GENCODE	424	chr1	+	9908375	9910212		ACAAACCCCAAATGTGAAGGCAGCAGCAAGTTCTTTGTGTAATAAATATTGCAAAGCGCA		natural antisense	NM_020248	CTNNBIP1	beta-catenin-interacting protein 1	-	9908333	9970316	74.3259	61.3454	6.15681	5.93248
ASHGA5P020695	1.01197	up	noncoding	ENST00000518631	RP11-586K2.1	GENCODE	576	chr8	+	89554845	89721920		ATGTCTCTGGAAAGGGTGAGCAGCTGACGTCCTTTGTTATTCATGTTAGGCTCCTGAAAA		intergenic							38.1898	37.8374	5.16768	5.15051
ASHGA5P019334	1.81285	up	noncoding	NR_046236	CMPK2	RefSeq	2426	chr2	-	6988439	7006766		AGAGGGCAATTCCAAGAAGAGGGAAAAGCTTGTGCACAGTGTACCTCCTTTATTCCTGAA	129607	exon sense-overlapping	NM_001256477	CMPK2	UMP-CMP kinase 2, mitochondrial isoform 2 precursor	-	6990780	7005950	40.3749	23.8047	5.25239	4.39413
ASHGA5P019334	1.81285	up	noncoding	NR_046236	CMPK2	RefSeq	2426	chr2	-	6988439	7006766		AGAGGGCAATTCCAAGAAGAGGGAAAAGCTTGTGCACAGTGTACCTCCTTTATTCCTGAA	129607	exon sense-overlapping	NM_001256478	CMPK2	UMP-CMP kinase 2, mitochondrial isoform 3 precursor	-	6980683	7005950	40.3749	23.8047	5.25239	4.39413
ASHGA5P019334	1.81285	up	noncoding	NR_046236	CMPK2	RefSeq	2426	chr2	-	6988439	7006766		AGAGGGCAATTCCAAGAAGAGGGAAAAGCTTGTGCACAGTGTACCTCCTTTATTCCTGAA	129607	exon sense-overlapping	NM_207315	CMPK2	UMP-CMP kinase 2, mitochondrial isoform 1 precursor	-	6988439	7005950	40.3749	23.8047	5.25239	4.39413
ASHGA5P039858	1.57045	up	noncoding	NR_037934	LOC285540	RefSeq	1133	chr4	+	25162293	25200127		GAAAAATCTTGTTATCTAGGTGAAAGCCAATGCTATCCTAATGACAAAATTGTTGGGGAA	285540	exon sense-overlapping	ENST00000512921	PI4K2B	phosphatidylinositol 4-kinase type 2 beta [Source:HGNC Symbol;Acc:18215]	+	25162284	25278928	446.417	247.782	8.7868	8.13563
ASHGA5P042217	1.05907	up	noncoding	ENST00000433761	RP1-40E16.2	GENCODE	398	chr6	+	3056123	3056995		TCAGTAGGAGCCCGTCCTCAAAAGGAAAATAACAGAACTTCCTGCTAATCTGGTATTGGG		intergenic							143.031	124.071	7.14375	7.06095
ASHGA5P014947	1.69616	up	noncoding	ENST00000415062	RP11-426A6.5	GENCODE	1117	chr9	-	138395118	138398293		CATCAGCTGAGTACGAGAACTGCCGGTTGCGGCTTATAAACAAGATGATGCCCTTGCGGT		natural antisense	NM_016034	MRPS2	28S ribosomal protein S2, mitochondrial	+	138392476	138396519	82.7102	48.9446	6.31621	5.55394
ASHGA5P049587	1.1911	up	noncoding	TCONS_00013565	XLOC_006210	LincRNAs identified by Cabili et al	1001	chr7	+	112257751	112266279		ATAAGGGCTGCACATGTCATAATGGGATCTAAACAAATAGGAGGTGTACAGGGCTTGTGG		intergenic							40.5706	34.6123	5.26041	5.00812
ASHGA5P029531	1.64641	up	noncoding	ENST00000556228	RP11-163M18.1	GENCODE	467	chr14	+	44978205	45007714		CTCCCGAAATGCTTAAAGTGCTTTTCCAATATCCACTATGTTTGGGCAACATATTAAAAA		intergenic							73.473	45.0511	6.13974	5.42042
ASHGA5P048149	1.14467	up	noncoding	ENST00000525337	AP000640.10	GENCODE	879	chr11	-	59520487	59522448		AATATCTTTGTAATTCTAGCAGTACTTTGCCCTCTTCTGCCATCTGAACGCGTGCTCCCT		intronic antisense	ENST00000300150	STX3	syntaxin 3 [Source:HGNC Symbol;Acc:11438]	+	59480928	59570176	9937.5	7255.35	13.268	13.0731
ASHGA5P044050	1.00716	up	noncoding	ENST00000447563	AC004863.6	GENCODE	3824	chr7	+	158801044	158815371		TGGAACTGCAAACTCTGTATTATCTCCCCTTTTGTGAAATTCTATGGAAAATTCGAGCAA		intergenic							665.712	553.662	9.3589	9.34862
ASHGA5P019716	1.56036	up	noncoding	NR_039994	TMEM161B-AS1	RefSeq	689	chr5	+	87564840	87732491	ENST00000501715, ENST00000504769, ENST00000506584, ENST00000512724	TGTCTGAGAGTTTAAACTTGATTTTGTGAGGGGACGAACAGCGTGACAATTAAAAGAAGA	100505894	bidirectional	NM_153354	TMEM161B	transmembrane protein 161B	-	87491022	87564665	271.024	157.05	8.07946	7.43759
ASHGA5P040017	3.22306	up	noncoding	ENST00000512077	RP11-115D19.1	GENCODE	457	chr4	+	90509016	90581506		GCTGCTGAAGTTTGAGATATAAAATATGTACCTAGAGCTAATATAATGGAGATCCCTGAA		intergenic							2723.07	705.596	11.4014	9.71296
ASHGA5P020150	2.0768	up	noncoding	uc010azg.1	WHAMMP2	UCSC_knowngene	999	chr15	+	28986246	28996820	ENST00000400153, ENST00000508764, NR_026589, uc001zci.1, uc010aye.1, uc010azf.3	TTGCCTCAACTAGGAATGCAAAAAGAAATGGAACAGGATGTGAAGAGACTTGGCCAGGCT	440253	intergenic							170.838	79.0714	7.40072	6.34636
ASHGA5P032500	1.17892	up	noncoding	TCONS_00029745	XLOC_014418	LincRNAs identified by Cabili et al	321	chr22	-	50981205	50983413		TGTCATCTGCCCCGTGAAATCAGCCTAACGCCGTTTCTCAATGACGTGGATCGCCCTAGG		intergenic							715.049	511.233	9.4697	9.23223
ASHGA5P058383	1.24992	up	noncoding	uc002lal.1	LOC647946	UCSC_knowngene	2306	chr18	-	36786887	37380282		ACATTTTTGGCGCGCAATGTGGGGGCACCAGAAGCGGGCACCGTTGAGCTGTTGCAACTG	647946	intron sense-overlapping	ENST00000321566	AC011139.1		-	36914835	36915639	73.8017	57.4938	6.14575	5.82392
ASHGA5P051906	1.11882	up	noncoding	ENST00000506425	RP11-412P11.1	GENCODE	957	chr4	+	23004775	23043141		CTAGACTTTTTTTTAGGGTGATTGGGTCATTGTTTTTTCTCCTGGAACCCTGAGTCCTCA		intergenic							86.583	73.3537	6.38543	6.22345
ASHGA5P056383	1.53351	up	noncoding	TCONS_00003837	XLOC_001643	LincRNAs identified by Cabili et al	237	chr2	+	121481837	121491735		CCATCCCATGGTCAAGAAGAAATTGTTGCTCCATCATATAAGTGAATGTCAGGAGGAGGA		intergenic							68.1168	44.9388	6.03398	5.41714
ASHGA5P029189	1.29645	up	noncoding	NR_046321	GPX2	RefSeq	1310	chr14	-	65405869	65409623		CCATCTCTTCAGCCTAGCAAGTTGCTGGAGGGAGTCTATAACCTACCAGGAGCCAGCCAG	2877	exon sense-overlapping	NM_002083	GPX2	glutathione peroxidase 2	-	65405869	65409623	40.3624	31.9861	5.25162	4.87705
ASHGA5P029189	1.29645	up	noncoding	NR_046321	GPX2	RefSeq	1310	chr14	-	65405869	65409623		CCATCTCTTCAGCCTAGCAAGTTGCTGGAGGGAGTCTATAACCTACCAGGAGCCAGCCAG	2877	intronic antisense	NM_001202558	CHURC1-FNTB	CHURC1-FNTB protein isoform 2	+	65381078	65529373	40.3624	31.9861	5.25162	4.87705
ASHGA5P029189	1.29645	up	noncoding	NR_046321	GPX2	RefSeq	1310	chr14	-	65405869	65409623		CCATCTCTTCAGCCTAGCAAGTTGCTGGAGGGAGTCTATAACCTACCAGGAGCCAGCCAG	2877	intronic antisense	NM_001202559	CHURC1-FNTB	CHURC1-FNTB protein isoform 1	+	65381078	65529373	40.3624	31.9861	5.25162	4.87705
ASHGA5P028767	1.02983	up	noncoding	ENST00000443576	RP11-141M1.1	GENCODE	466	chr13	+	33907982	33909403		GCTTTGTCTCCTGTGAGGGACTTTTGTTACAATCTGTTGATTTTAAACCACTGTTATATT		intronic antisense	NM_001243476	STARD13	stAR-related lipid transfer protein 13 isoform 4	-	33677271	34250932	312.214	266.227	8.28348	8.24107
ASHGA5P018569	2.76621	up	noncoding	ENST00000455116	AP001625.5	GENCODE	450	chr21	+	43928743	43929768		TGAAAGAAATCTTTTCTATGGACCTCTGGTTTTAGAGACAACATCTAGTTCTCTTACATC		intron sense-overlapping	NM_018964	SLC37A1	glycerol-3-phosphate transporter	+	43919741	44001550	45.6424	18.38	5.43464	3.96672
ASHGA5P043322	1.08772	up	noncoding	TCONS_00019601	XLOC_009404	LincRNAs identified by Cabili et al	2075	chr11	-	30707955	30716936		TATTTCCCTGGCTATTTTGGCAACATAAAAGGCCCAGTCTATATCAAGGCCCAAGTGAAT		intergenic							51.3746	47.1068	5.61619	5.49488
ASHGA5P023560	2.23739	up	noncoding	ENST00000584139	CTC-297N7.10	GENCODE	171	chr17	+	10584050	10587305		CCTTCCACAGGTCCTTAAATGATAACAGAAGTTTCCCAAACCATCCTATGGATGAAAATC		natural antisense	NM_004589	SCO1	protein SCO1 homolog, mitochondrial	-	10583648	10600885	264.956	111.524	8.04505	6.88323
ASHGA5P004549	1.32626	up	noncoding	ENST00000294715	RP11-14N7.2	GENCODE	268	chr1	+	148928330	148933368	ENST00000420597, ENST00000452399, ENST00000539543, NR_027238, uc002sts.4	CTGTGAAAGGACTGCTGGCCAGACCCCCAAGCTAGCCCGCCAGGCCTCCATAGAGCTGCC		intergenic							1251.16	782.131	10.2711	9.86375
ASHGA5P051101	4.20676	up	noncoding	NR_027873	GCFC1	RefSeq	4028	chr21	-	34106209	34144169		GATGATATTAAAGATGAATCTTCGGAGTTTTCAAGCCATTCAAGTCAGTCCATCTTGAAG	94104	exon sense-overlapping	NM_013329	GCFC1	GC-rich sequence DNA-binding factor 1 isoform 2	-	34113649	34144169	271.173	64.0726	8.08004	6.00733
ASHGA5P051101	4.20676	up	noncoding	NR_027873	GCFC1	RefSeq	4028	chr21	-	34106209	34144169		GATGATATTAAAGATGAATCTTCGGAGTTTTCAAGCCATTCAAGTCAGTCCATCTTGAAG	94104	exon sense-overlapping	NM_016631	GCFC1	GC-rich sequence DNA-binding factor 1 isoform 1	-	34106209	34144169	271.173	64.0726	8.08004	6.00733
ASHGA5P056336	1.17506	up	noncoding	TCONS_00003531	XLOC_001306	LincRNAs identified by Cabili et al	588	chr2	+	495794	496628		AGGGCAGAAGTCACCTGAGCATCCTGAGCATCGATGGTGAGAAGCTACAGGAGGCCGAGC		intergenic							23.191	21.2862	4.44674	4.21401
ASHGA5P043319	1.27839	up	noncoding	NR_046216	MGC27345	RefSeq	10079	chr7	-	127937737	127947816		GTGATCCTTTGCTTGGCTCTGAAGGAGCAGTGTTTTATATGTAAAGAATATATTCTGTAT	157247	intergenic							89.7694	67.2475	6.44135	6.08702
ASHGA5P022271	2.49395	up	noncoding	ENST00000553701	RP11-1017G21.4	GENCODE	447	chr14	-	102503005	102532565		AGGTAGACAGAACCACCGCAAAGCTTTATCCTTCTGATACAAAATGAAGTCTTACAAAGT		natural antisense	NM_001376	DYNC1H1	cytoplasmic dynein 1 heavy chain 1	+	102430864	102517135	40.0761	17.9099	5.24064	3.92221
ASHGA5P034942	1.21394	up	noncoding	TCONS_00015931	XLOC_007302	LincRNAs identified by Cabili et al	903	chr9	+	23850847	23946157		TTATCCAAACACTTAAGCAAGGAGAGGATCCTAAAATCGAAAAACGAAGGCGGAAGGGGC		intergenic							24.8738	21.9396	4.54181	4.26211
ASHGA5P019901	1.4074	up	noncoding	ENST00000504957	RP11-18H21.3	GENCODE	495	chr4	-	153128572	153147022		ATTTAATTATCCTGCACTGCTCAGATGTCAGTCTCTAAATTCCTAACACAAATGAACAGA		intergenic							101.523	69.0108	6.62412	6.13109
ASHGA5P058137	1.35991	up	noncoding	TCONS_00026952	XLOC_013010	LincRNAs identified by Cabili et al	1692	chr19	+	22085705	22101719		GGCCTAGCAGGACTGCCTGCAGGGGATATGGTGACATTTTACTTTGCCCAGCACCAAGAT		intergenic							49.0027	36.5797	5.54121	5.0977
ASHGA5P021481	1.31016	up	noncoding	ENST00000533179	AC005152.2	GENCODE	460	chr17	-	70086895	70115664		TCTTCATAAGGTTCATCTCAAAGATCTCTCTTTGCATAATGTGTGTGTGGACCTGCCTAC		intergenic							313.782	211.548	8.29081	7.90106
ASHGA5P056879	1.76073	up	noncoding	TCONS_00010162	XLOC_004625	LincRNAs identified by Cabili et al	402	chr5	+	163151151	163158626		CAATTTTAAGGATTCATGACTACAACCCCAAAATACGGCACTTCTGCCTGTGTGGAAACA		intergenic							849.413	411.038	9.72025	8.90408
ASHGA5P039743	1.27757	up	noncoding	ENST00000503037	RP11-217E13.1	GENCODE	474	chr4	-	187900643	187943127		CATGTCTGATTCTTCAGCTCTTCTGGCAATTCTGTAAATTACCCAAAATCCTTTCAATAA		intergenic							113.384	84.0368	6.79854	6.44513
ASHGA5P032323	1.06177	up	noncoding	ENST00000429210	RP11-312O7.2	GENCODE	758	chr1	-	206135292	206137828	ENST00000412759, ENST00000467933	GAGGAGAGCTCTGAGTGGGAAGCGGAGCCGGGGGCCTGGGACCCGTCGCGTCAGAGCCAG		intronic antisense	ENST00000367129	FAM72A	family with sequence similarity 72, member A [Source:HGNC Symbol;Acc:24044]	+	206137264	206154207	255.348	211.961	7.9912	7.90473
ASHGA5P020228	1.40495	up	noncoding	ENST00000509993	CTC-210G5.1	GENCODE	783	chr5	-	121772453	121804762		AAAGGGCAAAAGATGAGTGCCAGCCCGGCTGGAGGCTGACAGGCTTCCAAGAACCTGAAT		natural antisense	NM_001242935	SNCAIP	synphilin-1 isoform 1A	+	121647819	121799794	51.5972	37.4247	5.62344	5.13292
ASHGA5P020228	1.40495	up	noncoding	ENST00000509993	CTC-210G5.1	GENCODE	783	chr5	-	121772453	121804762		AAAGGGCAAAAGATGAGTGCCAGCCCGGCTGGAGGCTGACAGGCTTCCAAGAACCTGAAT		natural antisense	NM_005460	SNCAIP	synphilin-1 isoform 1	+	121647819	121799794	51.5972	37.4247	5.62344	5.13292
ASHGA5P019466	1.0628	up	noncoding	NR_026699	GLYCTK	RefSeq	3800	chr3	+	52321835	52329272	NM_145262, NR_026700, NR_026701	ACAGCTGATGACCTGCTGCTCGTGCTGATCTCAGAGGTGGGGGTTCAGCTCTGCTGCCTG	132158	exon sense-overlapping	NM_001144951	GLYCTK	glycerate kinase isoform 2	+	52321835	52327021	380.403	308.937	8.563	8.47513
ASHGA5P019466	1.0628	up	noncoding	NR_026699	GLYCTK	RefSeq	3800	chr3	+	52321835	52329272	NM_145262, NR_026700, NR_026701	ACAGCTGATGACCTGCTGCTCGTGCTGATCTCAGAGGTGGGGGTTCAGCTCTGCTGCCTG	132158	exon sense-overlapping	NM_145262	GLYCTK	glycerate kinase isoform 1	+	52321835	52329272	380.403	308.937	8.563	8.47513
ASHGA5P026366	1.45626	up	noncoding	ENST00000416119	RP11-240D10.4	GENCODE	623	chr1	-	55087149	55094111		CTAAAGTTCGAGGCCATTCACAACCTGATCCCAACGTTCTTCCAATCTTTTATCTTTTTT		intron sense-overlapping	NM_176782	FAM151A	protein FAM151A	-	55074849	55089200	755.036	441.428	9.55449	9.01222
ASHGA5P026366	1.45626	up	noncoding	ENST00000416119	RP11-240D10.4	GENCODE	623	chr1	-	55087149	55094111		CTAAAGTTCGAGGCCATTCACAACCTGATCCCAACGTTCTTCCAATCTTTTATCTTTTTT		intronic antisense	NM_015547	ACOT11	acyl-coenzyme A thioesterase 11 isoform 1	+	55013806	55100417	755.036	441.428	9.55449	9.01222
ASHGA5P033276	1.41541	up	noncoding	TCONS_00028417	XLOC_013770	LincRNAs identified by Cabili et al	269	chr20	-	46470885	46471713		AATGGAACAAGTCAAAGGCAAAGCAACACGTCCCCCTGTAAAAACTGTCAGTGTAACCGT		intergenic							8669.32	5125.38	13.0917	12.5905
ASHGA5P036353	1.42456	up	noncoding	TCONS_00026292	XLOC_012636	LincRNAs identified by Cabili et al	1605	chr18	+	14918960	14931880		TCAGTTTTCTTACAGGGATGGAGTCCTGAACAGAGAAGACTCTGGCCTGAAACCATTTGA		intergenic							34.3412	25.4334	5.01406	4.50354
ASHGA5P023508	1.06793	up	noncoding	uc002jak.3	BC041872	UCSC_knowngene	2276	chr17	+	60783566	60815282		TCATCAACTCTTGTTCCATCAGGAAACTGCATCTTGGATTCTGGGTCAACATCATCCCCA		natural antisense	NM_001100875	MARCH10	probable E3 ubiquitin-protein ligase MARCH10	-	60778674	60884011	31.7524	30.5122	4.89128	4.79647
ASHGA5P023508	1.06793	up	noncoding	uc002jak.3	BC041872	UCSC_knowngene	2276	chr17	+	60783566	60815282		TCATCAACTCTTGTTCCATCAGGAAACTGCATCTTGGATTCTGGGTCAACATCATCCCCA		natural antisense	NM_152598	MARCH10	probable E3 ubiquitin-protein ligase MARCH10	-	60778674	60885705	31.7524	30.5122	4.89128	4.79647
ASHGA5P045044	1.26757	up	noncoding	ENST00000561761	RP11-629O1.2	GENCODE	1546	chr8	+	134584413	134586104		TTAGCTTTGGCTGGGAATATCGTCTGGGCCAATAAAGAGTTTTTGGATGAAATAACAAAA		bidirectional	NM_003033	ST3GAL1	CMP-N-acetylneuraminate-beta-galactosamide- alpha-2,3-sialyltransferase 1	-	134467090	134584183	555.615	372.443	9.09951	8.75745
ASHGA5P045044	1.26757	up	noncoding	ENST00000561761	RP11-629O1.2	GENCODE	1546	chr8	+	134584413	134586104		TTAGCTTTGGCTGGGAATATCGTCTGGGCCAATAAAGAGTTTTTGGATGAAATAACAAAA		bidirectional	NM_173344	ST3GAL1	CMP-N-acetylneuraminate-beta-galactosamide- alpha-2,3-sialyltransferase 1	-	134467090	134584183	555.615	372.443	9.09951	8.75745
ASHGA5P020816	1.30742	up	noncoding	NR_045493	LSM1	RefSeq	883	chr8	-	38020838	38034248		TCCCCCAACGAAAAGCACTTGGTTCTGCTTCGAGATGGAAGGACACTTATAGGCTTTTTA	27257	exon sense-overlapping	NM_014462	LSM1	U6 snRNA-associated Sm-like protein LSm1	-	38020838	38034248	1665.66	1047.84	10.691	10.3042
ASHGA5P020816	1.30742	up	noncoding	NR_045493	LSM1	RefSeq	883	chr8	-	38020838	38034248		TCCCCCAACGAAAAGCACTTGGTTCTGCTTCGAGATGGAAGGACACTTATAGGCTTTTTA	27257	natural antisense	NM_001204878	BAG4	BAG family molecular chaperone regulator 4 isoform 2	+	38034105	38070819	1665.66	1047.84	10.691	10.3042
ASHGA5P020816	1.30742	up	noncoding	NR_045493	LSM1	RefSeq	883	chr8	-	38020838	38034248		TCCCCCAACGAAAAGCACTTGGTTCTGCTTCGAGATGGAAGGACACTTATAGGCTTTTTA	27257	natural antisense	NM_004874	BAG4	BAG family molecular chaperone regulator 4 isoform 1	+	38034105	38070819	1665.66	1047.84	10.691	10.3042
ASHGA5P037374	2.16479	up	noncoding	ENST00000430259	AP001469.9	GENCODE	2014	chr21	-	47671725	47674047		GCTGTGTTAAGGTACATTGATAGACCTGCTTCATTTTAGACTCTTCAGTAAGATAGTTTA		intron sense-overlapping	NM_003906	MCM3AP	80 kDa MCM3-associated protein	-	47655047	47705236	584.547	235.219	9.17614	8.06192
ASHGA5P047629	1.9529	up	noncoding	ENST00000566847	RP11-85A1.3	GENCODE	864	chr10	+	101380811	101381675		TATTAACCTTTAGGTCGCGACCGTTTGGAAAATAATAAAACTACGAATTCTCTTCTCCTA		bidirectional	NM_031212	SLC25A28	mitoferrin-2	-	101370274	101380221	47.2073	25.693	5.48621	4.52059
ASHGA5P027700	1.20899	up	noncoding	NR_033834	FLJ31485	RefSeq	3678	chr12	-	130636137	130646223		GGCCACTTCCTCGGAGAGTATTGGCTTTTAATTAAAACAAGCCCTACAATTTTTACATCG	440119	bidirectional	NM_007197	FZD10	frizzled-10 precursor	+	130647003	130650285	35.2694	30.2028	5.05147	4.77767
ASHGA5P020784	1.12905	up	noncoding	ENST00000519762	RP11-909N17.3	GENCODE	417	chr8	+	144499848	144501320		TACAGAGGCTGCATGGATGTGATGGTTGGAGTGGAAGCTGACATTGTGGGCCAGGAGACC		intergenic							70.763	60.6686	6.08838	5.91326
ASHGA5P051381	1.05861	up	noncoding	ENST00000427273	GRM7-AS1	GENCODE	194	chr3	-	7561824	7602020		TCTTTATATGAGTGACACTCCTCTTTATCCACAAGTGAGATCTATGTACCTCTCCTTTGA		intronic antisense	NM_000844	GRM7	metabotropic glutamate receptor 7 isoform a precursor	+	6902801	7783218	404.575	328.68	8.64658	8.56441
ASHGA5P051381	1.05861	up	noncoding	ENST00000427273	GRM7-AS1	GENCODE	194	chr3	-	7561824	7602020		TCTTTATATGAGTGACACTCCTCTTTATCCACAAGTGAGATCTATGTACCTCTCCTTTGA		intronic antisense	NM_181874	GRM7	metabotropic glutamate receptor 7 isoform b precursor	+	6902801	7783218	404.575	328.68	8.64658	8.56441
ASHGA5P028954	1.03559	up	noncoding	TCONS_00010530	XLOC_005050	LincRNAs identified by Cabili et al	1355	chr5	-	149016982	149020628		CAAACTGTTGTGGACTACGCGATCTCCACATGGAAGATGTCACATCAAAAAATAAAAATA		intergenic							12009.9	9744.93	13.5307	13.4802
ASHGA5P041346	1.1981	up	noncoding	ENST00000509456	RP11-284A20.1	GENCODE	204	chr5	+	124255639	124257291		TTATGCAGAGAAACCCCAAATCTGGGGCAAAGCCCTCCTGTTCATTTTATCTCACACAAG		intergenic							143.373	111.834	7.14804	6.88729
ASHGA5P058620	1.57423	up	noncoding	uc011crg.2	SMA4	UCSC_knowngene	2025	chr5	+	69140556	69275149	NR_029426, uc003jzw.3	GAAGCTTAAGGTGTCAGTTTCTTGGTCGGGAATGAAAATAGTGCCAACCTGTGATACCTT		intergenic							1402.58	734.338	10.4309	9.77622
ASHGA5P058034	1.02511	up	noncoding	TCONS_00025566	XLOC_012393	LincRNAs identified by Cabili et al	3567	chr17	-	13679959	13685245		AATCTTCCTAGAAGTCATCCTCTCAGCTCTTAATCTGGGTGTCTGGTTACCAGTTCAGAA		intergenic							165.784	146.068	7.3566	7.32082
ASHGA5P018923	1.10492	up	noncoding	NR_036577	APTX	RefSeq	1895	chr9	-	32972603	33001639		AGAGTGTAACAAGGGATATGTCAAGGTAAAGCAGAGTTTGAGGAAGAGGCAAAGAACCCT	54840	exon sense-overlapping	NM_001195248	APTX	aprataxin isoform e	-	32972603	33001639	164.968	136.042	7.35026	7.20632
ASHGA5P018923	1.10492	up	noncoding	NR_036577	APTX	RefSeq	1895	chr9	-	32972603	33001639		AGAGTGTAACAAGGGATATGTCAAGGTAAAGCAGAGTTTGAGGAAGAGGCAAAGAACCCT	54840	exon sense-overlapping	NM_001195249	APTX	aprataxin isoform a	-	32972603	33001574	164.968	136.042	7.35026	7.20632
ASHGA5P018923	1.10492	up	noncoding	NR_036577	APTX	RefSeq	1895	chr9	-	32972603	33001639		AGAGTGTAACAAGGGATATGTCAAGGTAAAGCAGAGTTTGAGGAAGAGGCAAAGAACCCT	54840	exon sense-overlapping	NM_001195250	APTX	aprataxin isoform f	-	32972603	33001639	164.968	136.042	7.35026	7.20632
ASHGA5P018923	1.10492	up	noncoding	NR_036577	APTX	RefSeq	1895	chr9	-	32972603	33001639		AGAGTGTAACAAGGGATATGTCAAGGTAAAGCAGAGTTTGAGGAAGAGGCAAAGAACCCT	54840	exon sense-overlapping	NM_001195251	APTX	aprataxin isoform g	-	32972603	33001639	164.968	136.042	7.35026	7.20632
ASHGA5P018923	1.10492	up	noncoding	NR_036577	APTX	RefSeq	1895	chr9	-	32972603	33001639		AGAGTGTAACAAGGGATATGTCAAGGTAAAGCAGAGTTTGAGGAAGAGGCAAAGAACCCT	54840	exon sense-overlapping	NM_001195252	APTX	aprataxin isoform i	-	32972603	33001639	164.968	136.042	7.35026	7.20632
ASHGA5P018923	1.10492	up	noncoding	NR_036577	APTX	RefSeq	1895	chr9	-	32972603	33001639		AGAGTGTAACAAGGGATATGTCAAGGTAAAGCAGAGTTTGAGGAAGAGGCAAAGAACCCT	54840	exon sense-overlapping	NM_001195254	APTX	aprataxin isoform h	-	32972603	33001610	164.968	136.042	7.35026	7.20632
ASHGA5P018923	1.10492	up	noncoding	NR_036577	APTX	RefSeq	1895	chr9	-	32972603	33001639		AGAGTGTAACAAGGGATATGTCAAGGTAAAGCAGAGTTTGAGGAAGAGGCAAAGAACCCT	54840	exon sense-overlapping	NM_175069	APTX	aprataxin isoform b	-	32972603	33001639	164.968	136.042	7.35026	7.20632
ASHGA5P018923	1.10492	up	noncoding	NR_036577	APTX	RefSeq	1895	chr9	-	32972603	33001639		AGAGTGTAACAAGGGATATGTCAAGGTAAAGCAGAGTTTGAGGAAGAGGCAAAGAACCCT	54840	exon sense-overlapping	NM_175073	APTX	aprataxin isoform a	-	32972603	33001639	164.968	136.042	7.35026	7.20632
ASHGA5P040906	1.32097	up	noncoding	ENST00000505248	RP11-423H2.5	GENCODE	547	chr5	-	177284945	177298191	ENST00000502354, ENST00000511796	TAAAAGAAAACAGACTTGTCACCTCTGGCAAAGCCTCAACATATGGGTATGTATCCGTCA		intergenic							37.4924	29.4778	5.14021	4.73861
ASHGA5P020333	2.23817	up	noncoding	ENST00000511823	RP11-33B1.1	pseudogene	336	chr4	+	120379122	120383019	ENST00000449219, ENST00000508519, ENST00000510011, ENST00000513147, ENST00000515251, NR_037630	GTGGATAACACTGGCAGCCTGTTATCAATTACATTGATATTAAATTTGAGGACTACCTAA									254.338	107.433	7.98413	6.82181
ASHGA5P016476	2.42765	up	noncoding	uc004eqg.1	LOC642776	UCSC_knowngene	2079	chrX	-	115033603	115085422	ENST00000430756	AGCCTCAGCTAGGGCACACAGAGTGAACAGAAAAAGAGGATACCTCTGCGATCCCGGGTC		intergenic							38.4941	17.6851	5.18119	3.90162
ASHGA5P019176	1.40465	up	noncoding	NR_024212	RNF185	RefSeq	2994	chr22	+	31556137	31603005		GAAAAACTGATTGACTGGGCTGGCGTTAACTGTGCGGAGGCAGTTGGCCGTGTTTACATC	91445	exon sense-overlapping	NM_001135825	RNF185	E3 ubiquitin-protein ligase RNF185 isoform 2	+	31556137	31603005	41.3279	30.5626	5.2896	4.79939
ASHGA5P019176	1.40465	up	noncoding	NR_024212	RNF185	RefSeq	2994	chr22	+	31556137	31603005		GAAAAACTGATTGACTGGGCTGGCGTTAACTGTGCGGAGGCAGTTGGCCGTGTTTACATC	91445	exon sense-overlapping	NM_152267	RNF185	E3 ubiquitin-protein ligase RNF185 isoform 1	+	31556137	31603005	41.3279	30.5626	5.2896	4.79939
ASHGA5P048912	1.24983	up	noncoding	TCONS_00024508	XLOC_011826	LincRNAs identified by Cabili et al	1832	chr16	+	88218474	88220609		TGTGCAAGCCGCTCCGTGTTGGAAAATGTATGTAAAGTAAAATAAACACGGCTCTCGCTG		intergenic							164.879	121.444	7.34901	7.02727
ASHGA5P053592	1.11805	up	noncoding	ENST00000518073	RP13-582O9.5	GENCODE	379	chr8	-	144362997	144363860		TGTTTGGTGCCCTGGTCGCGTGTCTTCCGAACTCTGCTGCTTCGCCCCGGCAAGAGCACT		intergenic							14819.1	11239.3	13.8252	13.6643
ASHGA5P040962	1.23504	up	noncoding	ENST00000568962	CTC-471C19.2	GENCODE	442	chr5	+	6030147	6030954		CCACCGTATGTGTTACCTTTCTACCTTGACTGTACCTTACATATGACTTAATAAATCATA		intergenic							80.5824	62.9264	6.2807	5.97614
ASHGA5P041666	1.05057	up	noncoding	ENST00000491317	LINC00518	GENCODE	1228	chr6	-	10430028	10435050		GCCTCACCTAAGGATAATGACTAAGAATAGGAAAAATTTACTGTGCAAAGATCAGTTCTT	221718	intergenic							23.1353	23.5219	4.44394	4.37277
ASHGA5P006392	1.35723	up	noncoding	NR_045683	MYO3B	RefSeq	6261	chr2	+	171034654	171511674	NR_045684	TAACTTTTATGGGTTCAGAAAATGGTCTTGCACAGAAGCATCGAACACCTCGCCGACGAT	140469	exon sense-overlapping	NM_001083615	MYO3B	myosin-IIIb isoform 1	+	171034654	171511674	55.2645	41.1619	5.72454	5.28388
ASHGA5P006392	1.35723	up	noncoding	NR_045683	MYO3B	RefSeq	6261	chr2	+	171034654	171511674	NR_045684	TAACTTTTATGGGTTCAGAAAATGGTCTTGCACAGAAGCATCGAACACCTCGCCGACGAT	140469	exon sense-overlapping	NM_138995	MYO3B	myosin-IIIb isoform 2	+	171034654	171511674	55.2645	41.1619	5.72454	5.28388
ASHGA5P019926	1.03963	up	noncoding	ENST00000505371	RP11-141O11.2	GENCODE	526	chr5	-	68266518	68325754	uc003jvf.1	TTCATATATATCACAGTCTTTGCTACAGCAGTGTGTTCCTCTCAAGTCACCCACTCGTTC		intergenic							370.615	307.533	8.52384	8.46777
ASHGA5P033669	2.58008	up	noncoding	ENST00000579775	RP11-357H3.1	GENCODE	211	chr18	-	73720072	73727816		GTGCAGCTGTATATGGGCCTGTTGGGGCTGATACAGCAGTCATTCTTTCCAAGAAATCTT		intergenic							15.4741	5.75634	3.83352	2.46611
ASHGA5P014679	1.19568	up	noncoding	ENST00000412410	AC073071.1	GENCODE	388	chr7	-	109162037	109237223		GAACACAAATTAGCTGGAGGAAAAGAATAAAAAGGAAATTACTCTGCCCAGCTATCAGCA		intergenic							101.526	80.0243	6.62435	6.36652
ASHGA5P039114	1.26975	up	noncoding	ENST00000488745	SNHG12	GENCODE	1365	chr1	-	28905052	28909495		AATTACATATTAGTGGAAGAGACAAGCCTTGAATAAATCGCCTTTCGGGGAGTATGACCC	85028	natural antisense	NM_017846	TRNAU1AP	tRNA selenocysteine 1-associated protein 1	+	28879528	28905057	6.3686	5	2.77011	2.42556
ASHGA5P030892	1.50974	up	noncoding	ENST00000382313	CTD-2270P14.3	GENCODE	3523	chr16	-	2787091	2790805		AATGTCTAATCTGTATGTCATCGGAGTCAATAATGTGTTTTGCTATCGCTCTGGTTCCAG		intergenic							24.3959	17.8522	4.51255	3.91825
ASHGA5P022331	2.85433	up	noncoding	uc001wuo.3	LOC283547	UCSC_knowngene	4400	chr14	-	39218542	39417475	NR_039982	CGTCTTGCTGATTATATGTCAAGTTCTGTGTGAAATGAGAGACCATGGGGATTCATTATT	283547	intergenic							33.7502	13.7123	4.98544	3.47229
ASHGA5P035499	1.53065	up	noncoding	ENST00000413451	RP5-930J4.4	GENCODE	572	chr1	+	21069479	21070455		ATGTAACTCTCCAACATTTCCTTATAAAAAAGGCAAACAAGAAGTGACAACTCATGCTCC		natural antisense	NM_016287	HP1BP3	heterochromatin protein 1-binding protein 3	-	21069170	21113181	101.926	64.4302	6.6315	6.01736
ASHGA5P022015	1.16458	up	noncoding	uc010xow.2	LOC126536	UCSC_knowngene	1144	chr19	+	16132697	16138270	uc002nca.3	CGGAAAACAGGACAAAGATGAGCTGCGTGCCCATAATTCCACGTTTACGCTGACTCCTCC	126536	intron sense-overlapping	ENST00000397365	AC004790.1		+	16124066	16152945	45.7857	39.5983	5.43949	5.21968
ASHGA5P026307	2.99855	up	noncoding	AA992250		LincRNAs identified by Khalil et al	552	chr5	+	65372703	65415636		GCGGAGAAGTCTGAAAGCAGGAATTGTGTATAATTCAAAACCAAATATGATTTCTGAAGT		intron sense-overlapping	ENST00000284037	ERBB2IP	erbb2 interacting protein [Source:HGNC Symbol;Acc:15842]	+	65222302	65378377	41.4948	15.7986	5.29583	3.71156
ASHGA5P026307	2.99855	up	noncoding	AA992250		LincRNAs identified by Khalil et al	552	chr5	+	65372703	65415636		GCGGAGAAGTCTGAAAGCAGGAATTGTGTATAATTCAAAACCAAATATGATTTCTGAAGT		intron sense-overlapping	ENST00000380935	ERBB2IP	erbb2 interacting protein [Source:HGNC Symbol;Acc:15842]	+	65222401	65376850	41.4948	15.7986	5.29583	3.71156
ASHGA5P026307	2.99855	up	noncoding	AA992250		LincRNAs identified by Khalil et al	552	chr5	+	65372703	65415636		GCGGAGAAGTCTGAAAGCAGGAATTGTGTATAATTCAAAACCAAATATGATTTCTGAAGT		intron sense-overlapping	ENST00000380936	ERBB2IP	erbb2 interacting protein [Source:HGNC Symbol;Acc:15842]	+	65222401	65376850	41.4948	15.7986	5.29583	3.71156
ASHGA5P026307	2.99855	up	noncoding	AA992250		LincRNAs identified by Khalil et al	552	chr5	+	65372703	65415636		GCGGAGAAGTCTGAAAGCAGGAATTGTGTATAATTCAAAACCAAATATGATTTCTGAAGT		intron sense-overlapping	ENST00000380938	ERBB2IP	erbb2 interacting protein [Source:HGNC Symbol;Acc:15842]	+	65222437	65374764	41.4948	15.7986	5.29583	3.71156
ASHGA5P026307	2.99855	up	noncoding	AA992250		LincRNAs identified by Khalil et al	552	chr5	+	65372703	65415636		GCGGAGAAGTCTGAAAGCAGGAATTGTGTATAATTCAAAACCAAATATGATTTCTGAAGT		intron sense-overlapping	ENST00000380939	ERBB2IP	erbb2 interacting protein [Source:HGNC Symbol;Acc:15842]	+	65222401	65376850	41.4948	15.7986	5.29583	3.71156
ASHGA5P026307	2.99855	up	noncoding	AA992250		LincRNAs identified by Khalil et al	552	chr5	+	65372703	65415636		GCGGAGAAGTCTGAAAGCAGGAATTGTGTATAATTCAAAACCAAATATGATTTCTGAAGT		intron sense-overlapping	ENST00000380943	ERBB2IP	erbb2 interacting protein [Source:HGNC Symbol;Acc:15842]	+	65222383	65376344	41.4948	15.7986	5.29583	3.71156
ASHGA5P026307	2.99855	up	noncoding	AA992250		LincRNAs identified by Khalil et al	552	chr5	+	65372703	65415636		GCGGAGAAGTCTGAAAGCAGGAATTGTGTATAATTCAAAACCAAATATGATTTCTGAAGT		intron sense-overlapping	ENST00000416865	ERBB2IP	erbb2 interacting protein [Source:HGNC Symbol;Acc:15842]	+	65222394	65374579	41.4948	15.7986	5.29583	3.71156
ASHGA5P026307	2.99855	up	noncoding	AA992250		LincRNAs identified by Khalil et al	552	chr5	+	65372703	65415636		GCGGAGAAGTCTGAAAGCAGGAATTGTGTATAATTCAAAACCAAATATGATTTCTGAAGT		intron sense-overlapping	ENST00000506030	ERBB2IP	erbb2 interacting protein [Source:HGNC Symbol;Acc:15842]	+	65222600	65374393	41.4948	15.7986	5.29583	3.71156
ASHGA5P026307	2.99855	up	noncoding	AA992250		LincRNAs identified by Khalil et al	552	chr5	+	65372703	65415636		GCGGAGAAGTCTGAAAGCAGGAATTGTGTATAATTCAAAACCAAATATGATTTCTGAAGT		intron sense-overlapping	ENST00000508515	ERBB2IP	erbb2 interacting protein [Source:HGNC Symbol;Acc:15842]	+	65284460	65374764	41.4948	15.7986	5.29583	3.71156
ASHGA5P026307	2.99855	up	noncoding	AA992250		LincRNAs identified by Khalil et al	552	chr5	+	65372703	65415636		GCGGAGAAGTCTGAAAGCAGGAATTGTGTATAATTCAAAACCAAATATGATTTCTGAAGT		intron sense-overlapping	ENST00000511297	ERBB2IP	erbb2 interacting protein [Source:HGNC Symbol;Acc:15842]	+	65222554	65374374	41.4948	15.7986	5.29583	3.71156
ASHGA5P026307	2.99855	up	noncoding	AA992250		LincRNAs identified by Khalil et al	552	chr5	+	65372703	65415636		GCGGAGAAGTCTGAAAGCAGGAATTGTGTATAATTCAAAACCAAATATGATTTCTGAAGT		intron sense-overlapping	NM_001006600	ERBB2IP	protein LAP2 isoform 7	+	65222381	65376851	41.4948	15.7986	5.29583	3.71156
ASHGA5P026307	2.99855	up	noncoding	AA992250		LincRNAs identified by Khalil et al	552	chr5	+	65372703	65415636		GCGGAGAAGTCTGAAAGCAGGAATTGTGTATAATTCAAAACCAAATATGATTTCTGAAGT		intron sense-overlapping	NM_001253697	ERBB2IP	protein LAP2 isoform 1	+	65222381	65376851	41.4948	15.7986	5.29583	3.71156
ASHGA5P026307	2.99855	up	noncoding	AA992250		LincRNAs identified by Khalil et al	552	chr5	+	65372703	65415636		GCGGAGAAGTCTGAAAGCAGGAATTGTGTATAATTCAAAACCAAATATGATTTCTGAAGT		intron sense-overlapping	NM_001253698	ERBB2IP	protein LAP2 isoform 4	+	65222381	65376851	41.4948	15.7986	5.29583	3.71156
ASHGA5P026307	2.99855	up	noncoding	AA992250		LincRNAs identified by Khalil et al	552	chr5	+	65372703	65415636		GCGGAGAAGTCTGAAAGCAGGAATTGTGTATAATTCAAAACCAAATATGATTTCTGAAGT		intron sense-overlapping	NM_001253699	ERBB2IP	protein LAP2 isoform 8	+	65222381	65376851	41.4948	15.7986	5.29583	3.71156
ASHGA5P026307	2.99855	up	noncoding	AA992250		LincRNAs identified by Khalil et al	552	chr5	+	65372703	65415636		GCGGAGAAGTCTGAAAGCAGGAATTGTGTATAATTCAAAACCAAATATGATTTCTGAAGT		intron sense-overlapping	NM_001253701	ERBB2IP	protein LAP2 isoform 9	+	65222381	65376851	41.4948	15.7986	5.29583	3.71156
ASHGA5P026307	2.99855	up	noncoding	AA992250		LincRNAs identified by Khalil et al	552	chr5	+	65372703	65415636		GCGGAGAAGTCTGAAAGCAGGAATTGTGTATAATTCAAAACCAAATATGATTTCTGAAGT		intron sense-overlapping	NM_018695	ERBB2IP	protein LAP2 isoform 2	+	65222381	65376851	41.4948	15.7986	5.29583	3.71156
ASHGA5P037882	1.41144	up	noncoding	ENST00000450963	CTA-211A9.5	GENCODE	658	chr22	+	27068739	27172811	ENST00000444388	TTCATAGAAGGAAGAAAATGGGAACAAAGGTGCTGCTGATCATCTGAGGTTGCCTGCATG		intergenic							241.589	154.973	7.9127	7.41554
ASHGA5P045975	1.4745	up	noncoding	ENST00000457964	RP11-123K19.2	GENCODE	394	chr9	+	129403034	129403572		GGGAGCCTGAAGTCCAGGCCTCTGAGATGATAGTCATAATTAAAGCTGCTGTTGACTGAA		intron sense-overlapping	NM_001174146	LMX1B	LIM homeobox transcription factor 1-beta isoform 3	+	129376721	129463311	38.1979	27.188	5.168	4.60778
ASHGA5P045975	1.4745	up	noncoding	ENST00000457964	RP11-123K19.2	GENCODE	394	chr9	+	129403034	129403572		GGGAGCCTGAAGTCCAGGCCTCTGAGATGATAGTCATAATTAAAGCTGCTGTTGACTGAA		intron sense-overlapping	NM_001174147	LMX1B	LIM homeobox transcription factor 1-beta isoform 2	+	129376721	129463311	38.1979	27.188	5.168	4.60778
ASHGA5P045975	1.4745	up	noncoding	ENST00000457964	RP11-123K19.2	GENCODE	394	chr9	+	129403034	129403572		GGGAGCCTGAAGTCCAGGCCTCTGAGATGATAGTCATAATTAAAGCTGCTGTTGACTGAA		intron sense-overlapping	NM_002316	LMX1B	LIM homeobox transcription factor 1-beta isoform 1	+	129376721	129463311	38.1979	27.188	5.168	4.60778
ASHGA5P029306	1.28582	up	noncoding	TCONS_00008392	XLOC_003842	LincRNAs identified by Cabili et al	966	chr4	+	190598740	190600367		AATGAAGAAGCCAGAACACATGAACACGAAACCAGCCAACCAACAAACACAAGCAGCATG		intergenic							191.334	136.163	7.57113	7.20844
ASHGA5P056624	1.40937	up	noncoding	TCONS_00006733	XLOC_003371	LincRNAs identified by Cabili et al	367	chr3	-	190500011	190500863		TTTGAAAAAATTCCGATTTCCTGTGTGCTGGCTTTATCAACAAAGAGGTTCTCACCAGAC		intergenic							376.393	233.524	8.54814	8.05309
ASHGA5P036879	1.14585	up	noncoding	NR_024470	LOC100127888	RefSeq	1440	chr20	-	61294378	61297973		AGAACTGACATAAAAGCAGAGGACCCCCAAGATTCAGTTTTCTCACCAAACAAGGTGGCA	100127888	natural antisense	NM_016354	SLCO4A1	solute carrier organic anion transporter family member 4A1	+	61273796	61303647	141.058	114.242	7.12318	6.92675
ASHGA5P016636	2.11764	up	noncoding	NR_027855	CLK1	RefSeq	1842	chr2	-	201717731	201729467		TTCACATGGGATGAAATTGTTGATACTTTAGGTGAAGGAGCTTTTGGAAAAGTTGTGGAG	1195	exon sense-overlapping	NM_001162407	CLK1	dual specificity protein kinase CLK1 isoform 2	-	201717731	201729284	324.541	140.131	8.3376	7.25514
ASHGA5P016636	2.11764	up	noncoding	NR_027855	CLK1	RefSeq	1842	chr2	-	201717731	201729467		TTCACATGGGATGAAATTGTTGATACTTTAGGTGAAGGAGCTTTTGGAAAAGTTGTGGAG	1195	exon sense-overlapping	NM_004071	CLK1	dual specificity protein kinase CLK1 isoform 1	-	201717731	201729467	324.541	140.131	8.3376	7.25514
ASHGA5P040495	1.95567	up	noncoding	TCONS_00021869	XLOC_010468	LincRNAs identified by Cabili et al	741	chr13	+	90203038	90204606		CATGCATCCAGTACCATTTTCCTGCACATAAAGCGCTATCTATTCATTAAGATTTCTAGT		intergenic							244.259	116.549	7.92808	6.96041
ASHGA5P032250	1.20353	up	noncoding	ENST00000583141	RP11-160E2.19	GENCODE	757	chr17	-	18994381	18995138		AGAAAGTGCGTTTCCTAAAACCAAATCCTGCCCTTGCTCCAAAACTGTCAGTGGTGGTTT		intergenic							10869.2	7554.83	13.396	13.1288
ASHGA5P026818	1.866	up	noncoding	TCONS_00011820	XLOC_005303	LincRNAs identified by Cabili et al	597	chr6	+	45633187	45634483		GGAGCTGGCCTATAAATCCTAAATACAGATGTAGTGATTGAACCCATCTAGGTAGCTTAT		intergenic							120.111	63.2822	6.8855	5.98555
ASHGA5P031386	1.17583	up	noncoding	ENST00000561567	RP4-536B24.3	GENCODE	756	chr16	-	87813739	87840082		TTGCTATGTCTGCACCAAAGTCCCTGCTTAAAACTTTGGAACAAGAATGTAGCTTCAACG		intergenic							618.072	443.603	9.2545	9.02082
ASHGA5P046400	1.38918	up	noncoding	ENST00000567614	WI2-89031B12.1	GENCODE	792	chrX	-	153746163	153746955		AGGAAGGGAGAGTTGTCTCGGAATGCTCAGGGGGACTCATTAAAGCAACACTTTCATAAA		intergenic							107.479	74.1304	6.71593	6.2417
ASHGA5P031398	3.04836	up	noncoding	uc002flc.1	BC028224	UCSC_knowngene	2391	chr16	-	88709698	88712089		CTGTTCATGACGTATATGATGTGACATATTTTTCCACCAGATATTATGGGATAGAAGATG		exon sense-overlapping	NM_000101	CYBA	cytochrome b-245 light chain	-	88709696	88717492	32.3461	12.3976	4.91776	3.30972
ASHGA5P055965	1.19314	up	noncoding	ENST00000556705	RP11-85K15.2	GENCODE	580	chr14	-	35432913	35451738		GCTCACTGACAGAATAAAGGTACCTTTTAACTTAGTCAAATCTCTTTTGCATTGTTTTCC		intronic antisense	ENST00000556994	SRP54	signal recognition particle 54kDa [Source:HGNC Symbol;Acc:11301]	+	35451162	35498773	893.358	629.943	9.79392	9.53916
ASHGA5P057467	1.36872	up	noncoding	TCONS_00018133	XLOC_008408	LincRNAs identified by Cabili et al	337	chr10	+	20886073	20898900		CTTGGATAAGCTACCTAAGATCGGAACCCTCTGATAATTTGTGCTGCTATTTTAAGATCC		intergenic							92.3259	65.1113	6.4864	6.03357
ASHGA5P018362	1.14308	up	noncoding	ENST00000452565	GS1-124K5.4	GENCODE	454	chr7	+	65958772	65960459	ENST00000445681, NM_001145712	CTGAGCCTGTGATGCCGAAGGACCTGTTCAAAGTATTTTCTGTAACTCCAACTGTAACTT		intergenic							785.9	579.512	9.61167	9.41874
ASHGA5P029365	1.16649	up	noncoding	TCONS_00016158	XLOC_007565	LincRNAs identified by Cabili et al	746	chr9	+	128507380	128508398		ATTTCCCCTTTCAATGGAAAGTCTATGGCAGTCAGGTCCACTCAGCTCAGACTTCAAGTA		intergenic							192.333	149.126	7.57877	7.3566
ASHGA5P008610	2.1227	up	noncoding	uc002msl.4	ZNF833P	UCSC_knowngene	3383	chr19	+	11750590	11797384		CCTTATAAATGTTGAAGAATTTGTGACCGTGGATAAGTTCGTTTCCTGTTATGTGAACTT	401898	intergenic							38.3438	19.8341	5.17459	4.08869
ASHGA5P056262	2.3499	up	noncoding	TCONS_00001508	XLOC_000852	LincRNAs identified by Cabili et al	236	chr1	-	59760716	59762053		GTAGGCGACTCAGCCGTGTTGAACCATGAAAGGACCTCAGGAATGAAACCCACACACAGC		intergenic							33.2457	15.9892	4.96043	3.72783
ASHGA5P014691	1.60841	up	noncoding	ENST00000412526	LINC00161	GENCODE	870	chr21	+	29911639	29912677		TTAGGCTTAGGAAGAAGAGAACTGTAGACATGCAGCAGCCATCTTGTGGATATGAGGGAA	118421	intergenic							36.9012	24.3411	5.11726	4.43162
ASHGA5P033636	2.22755	up	noncoding	NR_033983	LOC400654	RefSeq	2418	chr18	-	61880317	61927290		CCTTCCTAAAAAGTACTAGTTATCATCCTTCACTTTTCATGTTTAGAATCGGTTAGGTGA	400654	intergenic							52.1133	25.1112	5.63841	4.48295
ASHGA5P038499	1.01962	up	noncoding	ENST00000430605	NEGR1-AS1	GENCODE	213	chr1	+	71867529	71873407		GGAAAGCATGTATTTGTTTGCTAAATTGCTCTCTTTCCACCAGTGATATCAATTCTGAAA		intronic antisense	NM_173808	NEGR1	neuronal growth regulator 1 precursor	-	71868624	72748277	245.968	212.594	7.93847	7.91043
ASHGA5P020789	3.88437	up	noncoding	ENST00000519861	RP11-383J24.5	GENCODE	359	chr8	-	125485048	125486595		CATCTTTGAGCAAAAGGAGAGAGGCCATTATGGGGAAAAAGATCCAAAAGGACTCATCTA		bidirectional	NM_007218	RNF139	E3 ubiquitin-protein ligase RNF139	+	125487007	125500859	22.2577	5	4.38324	2.42556
ASHGA5P044770	1.29891	up	noncoding	ENST00000563059	KB-1836B5.1	GENCODE	911	chr8	+	37920398	37921309		GCTTACAACCTGATCAGGAGACGAGAAGTATTCCAAGTAGTAAATGGTCATTGGAAATAC		intergenic							6.55636	5	2.80286	2.42556
ASHGA5P056353	1.04604	up	noncoding	TCONS_00003660	XLOC_001447	LincRNAs identified by Cabili et al	298	chr2	+	43160632	43167334		GCTTGAGCAAGGTCACCGGCAGTTTCCTTTGCAGTAAAATGGGAATAAAAAGAAAATCTA		intergenic							153.472	133.76	7.24515	7.18022
ASHGA5P048219	1.16965	up	noncoding	TCONS_00013378	XLOC_006010	LincRNAs identified by Cabili et al	1759	chr7	+	22871219	22874253		AAGAATATACAGGCGAAATTGTCTCTAACTCTTCTGCAACTTGCTGCGCTGTTCTCCCTG		intergenic							1870.65	1314.44	10.8646	10.6385
ASHGA5P040553	4.83279	up	noncoding	ENST00000508885	LINC00461	GENCODE	558	chr5	-	87836648	87955653		CAGAGGCCGTTTACTTTCAATTCCACTTTTACAAAAGTAGTCAAGCTCTGTATTTCACAG	645323	intergenic							27.6554	5	4.69841	2.42556
ASHGA5P051583	1.2647	up	noncoding	ENST00000498432	RP11-398A8.3	GENCODE	573	chr3	-	72109914	72149454		AGAATGAAAGGCTTTCTGAACAAGAGTAAGTACCCCCACTGATGTGGCTTGGTGGTATCA		intergenic							81.5019	62.2345	6.29566	5.95687
ASHGA5P054391	1.27976	up	noncoding	NR_046284	LOC100128511	RefSeq	529	chr10	+	21463230	21463852		CGACTGTGCGGCCTGGGGAGTGAGCCTCGCGCCACCGCCGCTGCAGGCCGGGGAGCCCAG	100128511	bidirectional	NM_001173484	NEBL	nebulette isoform 3	-	21068902	21463116	1069.87	700.397	10.0563	9.70048
ASHGA5P054391	1.27976	up	noncoding	NR_046284	LOC100128511	RefSeq	529	chr10	+	21463230	21463852		CGACTGTGCGGCCTGGGGAGTGAGCCTCGCGCCACCGCCGCTGCAGGCCGGGGAGCCCAG	100128511	bidirectional	NM_213569	NEBL	nebulette isoform 2	-	21068902	21463116	1069.87	700.397	10.0563	9.70048
ASHGA5P022248	1.38317	up	noncoding	ENST00000553435	RP11-991C1.1	GENCODE	737	chr14	-	95426613	95429313		AATTCATGATTTGATGGCTTCGAGGCTCAGCCTCAGTGCTATAGTACTGACAAGGAAGCT		intergenic							33.2972	25.3022	4.96241	4.49444
ASHGA5P013408	1.03065	up	noncoding	ENST00000393515	ANKRD36BP2	GENCODE	1737	chr2	+	89065418	89106116		CTAGATGAAGTGCTTGTCCTAGTACCTTAGCACATGGTTGCTGAATACATGAATGAAGAG	645784	intergenic							64.5233	60.5711	5.95363	5.91007
ASHGA5P029626	1.17467	up	noncoding	ENST00000553944	ACTN1-AS1	GENCODE	475	chr14	+	69446757	69448270		ATCACCGCTTCTAAACTGTGGCTCTAAACCTAACACAGAGGGTAATGGTAGTGCTGTATC		bidirectional	NM_001102	ACTN1	alpha-actinin-1 isoform b	-	69340839	69446083	510.662	369.267	8.97718	8.74492
ASHGA5P029626	1.17467	up	noncoding	ENST00000553944	ACTN1-AS1	GENCODE	475	chr14	+	69446757	69448270		ATCACCGCTTCTAAACTGTGGCTCTAAACCTAACACAGAGGGTAATGGTAGTGCTGTATC		bidirectional	NM_001130004	ACTN1	alpha-actinin-1 isoform a	-	69340839	69446083	510.662	369.267	8.97718	8.74492
ASHGA5P029626	1.17467	up	noncoding	ENST00000553944	ACTN1-AS1	GENCODE	475	chr14	+	69446757	69448270		ATCACCGCTTCTAAACTGTGGCTCTAAACCTAACACAGAGGGTAATGGTAGTGCTGTATC		bidirectional	NM_001130005	ACTN1	alpha-actinin-1 isoform c	-	69340839	69446083	510.662	369.267	8.97718	8.74492
ASHGA5P043655	1.2637	up	noncoding	ENST00000423781	AC004870.4	GENCODE	706	chr7	+	47009313	47067079		ACCAGTACTGAGTGATGAAGAACATTTTGCTAAGTTGTTCTATCGTGGTCCTTGCTTAAG		intergenic							26.0108	22.0501	4.60742	4.26976
ASHGA5P030125	1.00051	up	noncoding	AW270668		LincRNAs identified by Khalil et al	423	chr10	-	76959428	76959842		AGCTCAAATATACTCCCACCACAATTTTCTTCTGTCTTACCAGCTACAAGTTCATTTTAT		intergenic							138.971	126.966	7.09998	7.09924
ASHGA5P023286	1.35005	up	noncoding	NR_024547	TMEM11	RefSeq	1688	chr17	-	21101262	21117908		ATTGTTGGAATGGTGAGCTTGTCGGCCACAGACTGCTACATTGTGCATGAGATCTACAAT	8834	exon sense-overlapping	NM_003876	TMEM11	transmembrane protein 11, mitochondrial	-	21101262	21117908	343.244	222.262	8.41319	7.98018
ASHGA5P046788	1.29983	up	noncoding	NR_028057	PLCXD1	RefSeq	2103	chrY	+	142990	170022		AGTGTCCCGCAGAGACCCGGCGGGAGCTGCCAGGAGCTCTGGGATTCCAGCGGCTGGAAG	55344	exon sense-overlapping	NM_018390	PLCXD1	PI-PLC X domain-containing protein 1	+	148060	170022	28.5545	23.3989	4.7413	4.36297
ASHGA5P048311	1.69452	up	noncoding	FN166013		LincRNAs identified by Khalil et al	100	chr3	+	188624049	188624151		GCCAAAGGCTTGCCGCTCTGAGGCAAATGTCACTGTGGTGGAGTTGTCTTAATGAGAAGG		intergenic							32.743	20.8313	4.9374	4.17652
ASHGA5P041645	1.37407	up	noncoding	ENST00000415144	RP3-406P24.3	GENCODE	209	chr6	-	4019076	4021449		AATGCTAGAAATGGACGTTTAGTTATTGAATCCCGCTAACGAGGGGAGCCAACAAGAGAG		bidirectional	NM_003913	PRPF4B	serine/threonine-protein kinase PRP4 homolog	+	4021568	4065217	52.3614	38.8223	5.64548	5.18702
ASHGA5P000589	1.00699	up	noncoding	DA962001		LincRNAs identified by Khalil et al	556	chr15	-	70827525	70828126		TTCAGTTTTCTCTTCTCTGCTCAGTAAGCTCAGTTTAGCTCTGTGTGTGTGCGTGTGTCT		intergenic							1954.56	1602.67	10.9254	10.9153
ASHGA5P045216	1.02737	up	noncoding	ENST00000426946	RP11-220I1.2	GENCODE	944	chr9	-	37112914	37115487	ENST00000426358	GCTGCATTTCAAAATTGAACTTTAGCATGGAGTCTATGATGACTGGCTCATGTCTCTCCA		intergenic							235.889	202.804	7.87645	7.83749
ASHGA5P043181	1.30163	up	noncoding	ENST00000471553	RP5-1121E10.2	GENCODE	578	chr7	-	89748612	89752204		CACTGAAAGACTCAGAGCCATTTAACCATATAACCACTGCAGAATCTTTAACTTCTTTTT		intergenic							120.574	87.946	6.89092	6.5106
ASHGA5P035228	1.32586	up	noncoding	ENST00000414416	LINC00116	GENCODE	2051	chr2	-	110969105	111002997		TAGAAGGATGCCTTCCTCCAAGACCTGTTTGGAGAATTAAACCAGCTAATGTAGGAGCCA	205251	intergenic							139.73	99.263	7.108	6.70107
ASHGA5P027665	1.40777	up	noncoding	CN264150		LincRNAs identified by Khalil et al	685	chrX	-	111874798	111959674		GAATCCCTCTTTCAGACTGCTGCAGATGCTTGTACTTAGAGTACTTAACCTGCATATAAG		exon sense-overlapping	ENST00000371968	LHFPL1	lipoma HMGIC fusion partner-like 1 [Source:HGNC Symbol;Acc:6587]	-	111873875	111923282	87.5947	60.5396	6.4026	5.90919
ASHGA5P027665	1.40777	up	noncoding	CN264150		LincRNAs identified by Khalil et al	685	chrX	-	111874798	111959674		GAATCCCTCTTTCAGACTGCTGCAGATGCTTGTACTTAGAGTACTTAACCTGCATATAAG		exon sense-overlapping	ENST00000536453	LHFPL1	lipoma HMGIC fusion partner-like 1 [Source:HGNC Symbol;Acc:6587]	-	111873878	111923375	87.5947	60.5396	6.4026	5.90919
ASHGA5P027665	1.40777	up	noncoding	CN264150		LincRNAs identified by Khalil et al	685	chrX	-	111874798	111959674		GAATCCCTCTTTCAGACTGCTGCAGATGCTTGTACTTAGAGTACTTAACCTGCATATAAG		exon sense-overlapping	NM_178175	LHFPL1	lipoma HMGIC fusion partner-like 1 protein precursor	-	111873878	111923375	87.5947	60.5396	6.4026	5.90919
ASHGA5P049344	1.15194	up	noncoding	TCONS_00020652	XLOC_009952	LincRNAs identified by Cabili et al	896	chr12	+	130442121	130445606	TCONS_00020653	CTTGGGGCTGCTTACTACAACTGAAGGAAGTGTAAGCGACCGCCTCTCTGAGACAGCCAG		intergenic							59.8834	51.6723	5.84478	5.64071
ASHGA5P019754	1.056	up	noncoding	ENST00000502600	AOX2P	GENCODE	563	chr2	+	201560639	201612763		TGATGAGTAGTGGGAATTTGTGTCAGCCTTCCGACAGGCTCAATGCCAGCAGAATGCCTT	344454	intergenic							39.7988	37.8893	5.2304	5.1518
ASHGA5P021076	2.37834	up	noncoding	ENST00000524512	RP11-60I3.4	GENCODE	336	chr9	-	102677358	102692178		CTAAAAAATGAGGTCTGTTGGGATTACTATCTTAATGAATTTCTGGATAGCTGGTTCAAG		natural antisense	NM_017919	STX17	syntaxin-17	+	102668914	102736818	156.748	64.7035	7.27415	6.02419
ASHGA5P018037	1.62223	up	noncoding	NR_026927	LOC115110	RefSeq	2216	chr1	-	2481358	2484284		TTTGTGATTCAGGAAAGAAAGCACGCAGCCAAAGAGCGCAAAGAGGCTCAGAGGAGGCCC	115110	intergenic							48.5312	31.1316	5.52731	4.82933
ASHGA5P027674	1.40122	up	noncoding	uc001uhh.4	LOC400084	UCSC_knowngene	2822	chr12	-	126443233	126467920		GCATCACATACTGCAGTGAAATTCTAGAGTGGGTGTTGTCAGGTGGTGATGATTGTTAGA	400084	intergenic							60.7687	43.8817	5.86873	5.38204
ASHGA5P049475	1.16905	up	noncoding	ENST00000572046	AC113189.5	GENCODE	287	chr17	-	7485329	7486328		AAGTCTACAAGGTCACACGGATGTCTGCAGGCAGAGGTGGGGCTGCTGGGGCCCTGCCAG		natural antisense	NM_001040059	CD68	macrosialin isoform B precursor	+	7482805	7485429	423.523	311.944	8.71351	8.48817
ASHGA5P049475	1.16905	up	noncoding	ENST00000572046	AC113189.5	GENCODE	287	chr17	-	7485329	7486328		AAGTCTACAAGGTCACACGGATGTCTGCAGGCAGAGGTGGGGCTGCTGGGGCCCTGCCAG		natural antisense	NM_001251	CD68	macrosialin isoform A precursor	+	7482804	7485429	423.523	311.944	8.71351	8.48817
ASHGA5P047318	1.12498	up	noncoding	ENST00000426922	RP11-478H13.3	GENCODE	406	chr10	+	29095875	29097148		TTGAATTAGTGTTACCCACTAACAGGATGAGGAATTCCCACTCCACAAGCTGACTTTTTT		intergenic							291.644	227.625	8.18829	8.01839
ASHGA5P037130	1.33929	up	noncoding	uc002xyu.1	AK056098	UCSC_knowngene	2570	chr20	+	56285238	56287808		AGTTAATTCAGTGGCTTAAAGAAACCAAACCTACCCACAACGCTTGACCTCCCATTGATC		natural antisense	NM_199169	PMEPA1	transmembrane prostate androgen-induced protein isoform b	-	56223447	56285670	622.887	395.552	9.26384	8.84237
ASHGA5P037130	1.33929	up	noncoding	uc002xyu.1	AK056098	UCSC_knowngene	2570	chr20	+	56285238	56287808		AGTTAATTCAGTGGCTTAAAGAAACCAAACCTACCCACAACGCTTGACCTCCCATTGATC		natural antisense	NM_199170	PMEPA1	transmembrane prostate androgen-induced protein isoform c precursor	-	56223447	56285670	622.887	395.552	9.26384	8.84237
ASHGA5P037130	1.33929	up	noncoding	uc002xyu.1	AK056098	UCSC_knowngene	2570	chr20	+	56285238	56287808		AGTTAATTCAGTGGCTTAAAGAAACCAAACCTACCCACAACGCTTGACCTCCCATTGATC		natural antisense	NM_199171	PMEPA1	transmembrane prostate androgen-induced protein isoform c precursor	-	56223447	56286592	622.887	395.552	9.26384	8.84237
ASHGA5P056758	1.20893	up	noncoding	TCONS_00008419	XLOC_003874	LincRNAs identified by Cabili et al	1944	chr4	-	8160851	8166042		TATTTAGAGATGAAGAAAGGACAAGGAATCCTGCCGCTTTGGACTAGAAAGCCCAGCACA		intergenic							253.824	186.628	7.98141	7.70768
ASHGA5P043975	1.19648	up	noncoding	ENST00000421648	AC092214.10	GENCODE	484	chr7	+	143104925	143112923		CCCATTCCGCACATATCTCATACCAAAGTACAAATAAAACCATTCCCAATTGTTCTAATA		intronic antisense	NM_005232	EPHA1	ephrin type-A receptor 1 precursor	-	143088204	143105985	183.092	139.38	7.50448	7.24568
ASHGA5P039443	1.68552	up	noncoding	TCONS_00022631	XLOC_010932	LincRNAs identified by Cabili et al	1399	chr14	+	101361101	101362601		AACTAAAATGCTGTGTAATAAATAGTGGGGCTTCACGTGCAGGAAAGGCGATTAAGAGCG		intergenic							93.2044	54.9425	6.49864	5.74544
ASHGA5P057902	1.12836	up	noncoding	TCONS_00023528	XLOC_011366	LincRNAs identified by Cabili et al	931	chr15	+	95562062	95613962		ATTTACAAAAGGAGATTGGCCAAGTCCTTGAAAGATCCCCTGAAATGCTGGGCACACTGA		intergenic							35.4552	32.1314	5.05893	4.8847
ASHGA5P057458	1.37709	up	noncoding	TCONS_00017639	XLOC_008298	LincRNAs identified by Cabili et al	293	chrY	+	21440565	21442464		AAACAGAGCTTACATCCAAGGATACATACGTCTGAAACCTACAGGCCCATGTACTCCGAT		intergenic							55.5587	40.8124	5.73286	5.27124
ASHGA5P057446	1.36612	up	noncoding	TCONS_00017426	XLOC_008001	LincRNAs identified by Cabili et al	267	chrX	+	64586533	64588866		TACACAGGAAGGCTATGGACTCCTTTTGGCATTTCTGCCTCAGCAACAGAGGATAAAAGT		intergenic							74.3547	53.8561	6.15781	5.70772
ASHGA5P045824	2.29069	up	noncoding	ENST00000465736	ANKRD19P	GENCODE	959	chr9	+	95571849	95587136	ENST00000460854, NR_026868, uc004asr.4	CTGAGCAGAAGATGCCAGATCAACATATATGATAGACTAAACAGGACACCTTTAATGAAG	138649	intergenic							68.3256	31.3525	6.0388	4.84301
ASHGA5P030737	1.01451	up	noncoding	ENST00000567484	RP11-429B14.4	GENCODE	1456	chr15	+	90052191	90053647		AGGATTAATATACCATTACAGGTTTAAAGACAGAGGCCTATAAGGGTCCCCTGGCAGTGC		intergenic							25.8395	26.6481	4.5971	4.57632
ASHGA5P028952	2.46475	up	noncoding	ENST00000423246	GRTP1-AS1	GENCODE	465	chr13	+	114006130	114016183		CTGTTGCACTTTGTAGCCCTCAGTATGATTAAAGTGTTTACCATGTACATAAATTATGCT		intronic antisense	NM_024719	GRTP1	growth hormone-regulated TBC protein 1	-	113978504	114018463	168.195	66.9619	7.37962	6.07818
ASHGA5P040810	1.52245	up	noncoding	uc003lul.1	AX747215	UCSC_knowngene	2163	chr5	-	151136012	151138175		TATACACATACTGGAAGGGGAAGAGTGTGTTACCTGAGAGTTTTCTCAGACAAATGCCCG		exon sense-overlapping	NM_004045	ATOX1	copper transport protein ATOX1	-	151122382	151138210	20.4553	15.1477	4.25281	3.64642
ASHGA5P028280	1.12667	up	noncoding	ENST00000548846	RP3-473L9.4	GENCODE	209	chr12	+	111834638	111841111		GGGAAGGTTATTTGTTGGAATCCCTTTGCCTTTCCAAGGGAAAATAAACACAAAAAGTGA		intergenic							3192.13	2347.09	11.6327	11.4607
ASHGA5P016025	1.0097	up	noncoding	ENST00000425979	AP000475.2	GENCODE	482	chr21	+	23119292	23169735	ENST00000430060	CTGAGGCAGACAAAAGAAGAGTTGTTCAAGGAGAAGAAGACTTAGAGACACAGACACACA		intergenic							5.49962	5	2.43948	2.42556
ASHGA5P030991	1.5975	up	noncoding	ENST00000552753	MIR3179-3	GENCODE	543	chr16	-	18505165	18505708	ENST00000546674, ENST00000547549	TGCAGGGGTTAGCAAACTATGGCCCACTGTTCTTGTTTTATAAATAAAGTGTTATGAGCA		intergenic							2658.78	1363.04	11.3644	10.6885
ASHGA5P046410	1.06298	up	noncoding	TCONS_00001387	XLOC_000701	LincRNAs identified by Cabili et al	857	chr1	-	11371803	11374861		AAGCCATCCTTTAGGCCAAAGAATCCCCACATAACAAATTCATTGTGTGCAATAAAGAAC		intergenic							33.9402	32.5798	4.99467	4.90656
ASHGA5P042770	1.01384	up	noncoding	TCONS_00019502	XLOC_009303	LincRNAs identified by Cabili et al	575	chr11	+	119817136	119821850		ATCATGCCAGCTACGATCAGAGGTGCTTGAGATATATGCTGCTTCCTCTTTACGCACTAA		intergenic							170.169	150.957	7.39487	7.37504
ASHGA5P005611	2.21869	up	noncoding	NR_045623	NABP1	RefSeq	3969	chr2	+	192542861	192553248	NR_045622	GGGGTGTAAGATTTTGTATGGTTTATTCAGAAGTGCCAAATTTCAGTGAACCCAACCCAG	64859	exon sense-overlapping	NM_001031716	NABP1	SOSS complex subunit B2 isoform 1	+	192542860	192553248	177.816	77.269	7.46066	6.31095
ASHGA5P005611	2.21869	up	noncoding	NR_045623	NABP1	RefSeq	3969	chr2	+	192542861	192553248	NR_045622	GGGGTGTAAGATTTTGTATGGTTTATTCAGAAGTGCCAAATTTCAGTGAACCCAACCCAG	64859	exon sense-overlapping	NM_001254736	NABP1	SOSS complex subunit B2 isoform 2	+	192542797	192553248	177.816	77.269	7.46066	6.31095
ASHGA5P028358	1.15862	up	noncoding	TCONS_00010712	XLOC_004420	LincRNAs identified by Cabili et al	480	chr5	+	70959258	70966714		CAATGCTTGTAGCAACCAACCCTACCTGGCAACATGTTCTTCTGCAAGCCAGAGGTTACA		intergenic							251.867	192.938	7.97134	7.75893
ASHGA5P055955	1.09359	up	noncoding	ENST00000555421	RP11-829H16.3	GENCODE	431	chr14	-	31353670	31354394		GGGAGAATTAAAAAGGTAAAATAAGCAACATTACATGCCTTAAAAAACAGTTTTAAAACC		natural antisense	NM_001135058	COCH	cochlin precursor	+	31343740	31359822	26.7863	25.7161	4.65172	4.52265
ASHGA5P055955	1.09359	up	noncoding	ENST00000555421	RP11-829H16.3	GENCODE	431	chr14	-	31353670	31354394		GGGAGAATTAAAAAGGTAAAATAAGCAACATTACATGCCTTAAAAAACAGTTTTAAAACC		natural antisense	NM_004086	COCH	cochlin precursor	+	31343740	31359822	26.7863	25.7161	4.65172	4.52265
ASHGA5P046088	1.4477	up	noncoding	uc011mgv.2	BC063132	UCSC_knowngene	737	chrUn_gl000241	-	20432	36875		TGGCAGGTATATCCTGAATGAATGTGAGATTTTTACTCTGTGAATTTCCTGTGAGAAGTG		intergenic							1131.75	658.842	10.139	9.60525
ASHGA5P015457	1.31357	up	noncoding	ENST00000420418	AC007970.1	GENCODE	476	chr2	+	211189489	211333418		ATTTTTAAAATGTGAGACACCTGTTACCCTAGAGTGTGAAGAGGAGGAGAAAGGCTGAAG		intronic antisense	NM_001136574	LANCL1	lanC-like protein 1	-	211295972	211341429	51.8763	40.0235	5.63213	5.23864
ASHGA5P015457	1.31357	up	noncoding	ENST00000420418	AC007970.1	GENCODE	476	chr2	+	211189489	211333418		ATTTTTAAAATGTGAGACACCTGTTACCCTAGAGTGTGAAGAGGAGGAGAAAGGCTGAAG		intronic antisense	NM_001136575	LANCL1	lanC-like protein 1	-	211295972	211341499	51.8763	40.0235	5.63213	5.23864
ASHGA5P015457	1.31357	up	noncoding	ENST00000420418	AC007970.1	GENCODE	476	chr2	+	211189489	211333418		ATTTTTAAAATGTGAGACACCTGTTACCCTAGAGTGTGAAGAGGAGGAGAAAGGCTGAAG		intronic antisense	NM_006055	LANCL1	lanC-like protein 1	-	211295972	211341491	51.8763	40.0235	5.63213	5.23864
ASHGA5P053220	4.36203	up	noncoding	NR_028038	GATS	RefSeq	4074	chr7	-	99806558	99869855		TCAATGATGGGATAAAAATCAAGGGTAAGAAGAGGATGTAAGGCAGCTGGTGTTAATGGG	352954	exon sense-overlapping	NM_178831	GATS	putative protein GATS	-	99798277	99869855	32.0248	8.23531	4.90298	2.77798
ASHGA5P053220	4.36203	up	noncoding	NR_028038	GATS	RefSeq	4074	chr7	-	99806558	99869855		TCAATGATGGGATAAAAATCAAGGGTAAGAAGAGGATGTAAGGCAGCTGGTGTTAATGGG	352954	intronic antisense	NM_024070	PVRIG	transmembrane protein PVRIG	+	99816870	99819111	32.0248	8.23531	4.90298	2.77798
ASHGA5P053220	4.36203	up	noncoding	NR_028038	GATS	RefSeq	4074	chr7	-	99806558	99869855		TCAATGATGGGATAAAAATCAAGGGTAAGAAGAGGATGTAAGGCAGCTGGTGTTAATGGG	352954	natural antisense	NM_012447	STAG3	cohesin subunit SA-3	+	99775537	99812010	32.0248	8.23531	4.90298	2.77798
ASHGA5P031102	1.53878	up	noncoding	TCONS_00006091	XLOC_002701	LincRNAs identified by Cabili et al	811	chr3	+	71834485	71835668		TCCAAAGCTCCACGTGCTCAGCGCCGAAAACTTGCAAATCATTTGCTGTACAGATGTTTA		intergenic							128.757	79.7439	6.98295	6.36116
ASHGA5P040565	1.01141	up	noncoding	TCONS_00021904	XLOC_010500	LincRNAs identified by Cabili et al	563	chr13	+	111474462	111477340	TCONS_00021505, TCONS_00021905	ATTTTCTGCAGATTACTTTCTACAAGACGATTTGGGACCTCAGTTTACCACCTCCCAGCG		intergenic							154.469	138.518	7.2532	7.23683
ASHGA5P047897	1.17785	up	noncoding	BQ448447		LincRNAs identified by Khalil et al	514	chr20	+	32047529	32048206		TTATGACAAGTGACTCAGCCTACAGTTAAACTGCTGACCTCTCAAAGTGTACGGTGGACA		intergenic							173.791	134.617	7.42661	7.19045
ASHGA5P021568	1.40087	up	noncoding	NR_033948	P2RX7	RefSeq	3903	chr12	+	121570630	121624354	NR_033949	CCATTCTTGGGGGAACTCTTTCTTCGTGATGACAAACTTTCTCAAAACAGAAGGCCAAGA	5027	exon sense-overlapping	NM_002562	P2RX7	P2X purinoceptor 7	+	121570630	121624354	46.0294	33.6639	5.44736	4.96104
ASHGA5P014919	1.19397	up	noncoding	ENST00000414744	SPAG5-AS1	GENCODE	2141	chr17	+	26925807	26944393		AACCTGTTGAAGAATGGACTTAGAGGAAACCGAAGAAATCCCAAGCCACACCAAACAGGA		intronic antisense	NM_001174103	SGK494	uncharacterized serine/threonine-protein kinase SgK494	-	26934981	26941211	38.1324	32.6307	5.16546	4.90968
ASHGA5P014919	1.19397	up	noncoding	ENST00000414744	SPAG5-AS1	GENCODE	2141	chr17	+	26925807	26944393		AACCTGTTGAAGAATGGACTTAGAGGAAACCGAAGAAATCCCAAGCCACACCAAACAGGA		natural antisense	NM_006461	SPAG5	sperm-associated antigen 5	-	26904582	26926056	38.1324	32.6307	5.16546	4.90968
ASHGA5P014919	1.19397	up	noncoding	ENST00000414744	SPAG5-AS1	GENCODE	2141	chr17	+	26925807	26944393		AACCTGTTGAAGAATGGACTTAGAGGAAACCGAAGAAATCCCAAGCCACACCAAACAGGA		natural antisense	NM_014680	KIAA0100	UPF0378 protein KIAA0100 precursor	-	26941457	26972177	38.1324	32.6307	5.16546	4.90968
ASHGA5P040302	2.87636	up	noncoding	ENST00000509745	RP11-468D11.1	GENCODE	560	chr5	-	2831134	2835253		CACTCCAGTTTAGCAGTTATGGTGTACAAGTCCACAACCACCTAAGAACAGAAGTTGAAA		intergenic							248.88	83.2335	7.95406	6.42982
ASHGA5P057071	1.43377	up	noncoding	TCONS_00012596	XLOC_005458	LincRNAs identified by Cabili et al	755	chr6	+	126397480	126398962	TCONS_00011946	ACTTCCTCAATTATGCCAGCCAGTGTTCTAAATCAGGAGCCAAAAGAAGTTGGAGCAGCT		intron sense-overlapping	ENST00000563385	RP11-73O6.4	Uncharacterized protein [Source:UniProtKB/TrEMBL;Acc:H3BR05]	+	126112110	130461627	92.565	62.6885	6.48862	5.96881
ASHGA5P041033	1.02534	up	noncoding	ENST00000412838	RP11-316M1.3	GENCODE	368	chr1	+	150945598	150948010		GCCCTGTCTGAAAGAGCCACCCCAACTTTTGTTTTGTAAAATGTATGAGTTTTCAAATGA		intronic antisense	NM_022075	CERS2	ceramide synthase 2	-	150937648	150947479	297.08	254.51	8.21567	8.17956
ASHGA5P041033	1.02534	up	noncoding	ENST00000412838	RP11-316M1.3	GENCODE	368	chr1	+	150945598	150948010		GCCCTGTCTGAAAGAGCCACCCCAACTTTTGTTTTGTAAAATGTATGAGTTTTCAAATGA		intronic antisense	NM_181746	CERS2	ceramide synthase 2	-	150937648	150947479	297.08	254.51	8.21567	8.17956
ASHGA5P013205	1.49915	up	noncoding	NR_024091	ZFP91-CNTF	RefSeq	3544	chr11	+	58346586	58393205		AAGGGATGTCAAAGTCATACTGCAGTGGGACGGAACGGAGCATTCACCGCTGACCCCTCA	386607	exon sense-overlapping	NM_000614	CNTF	ciliary neurotrophic factor	+	58390145	58393205	1568.05	859.348	10.5978	10.0137
ASHGA5P013205	1.49915	up	noncoding	NR_024091	ZFP91-CNTF	RefSeq	3544	chr11	+	58346586	58393205		AAGGGATGTCAAAGTCATACTGCAGTGGGACGGAACGGAGCATTCACCGCTGACCCCTCA	386607	exon sense-overlapping	NM_001197051	ZFP91	E3 ubiquitin-protein ligase ZFP91 isoform 2	+	58346586	58389023	1568.05	859.348	10.5978	10.0137
ASHGA5P013205	1.49915	up	noncoding	NR_024091	ZFP91-CNTF	RefSeq	3544	chr11	+	58346586	58393205		AAGGGATGTCAAAGTCATACTGCAGTGGGACGGAACGGAGCATTCACCGCTGACCCCTCA	386607	exon sense-overlapping	NM_053023	ZFP91	E3 ubiquitin-protein ligase ZFP91 isoform 1	+	58346586	58389023	1568.05	859.348	10.5978	10.0137
ASHGA5P048277	1.35394	up	noncoding	ENST00000531347	ANO1-AS2	GENCODE	1004	chr11	-	69918539	69921539		ACGCTTTCCTGCAAAACCCTGTGGTTGGAATAAAAGATGTTCCAGAATTTTGTTATGCCA	100009613	intergenic							144.621	100.666	7.16151	6.72434
ASHGA5P019950	1.23731	up	noncoding	ENST00000505718	ARHGAP22-IT1	GENCODE	470	chr10	-	49718567	49719632		ATCAACAACTTCTGGAAGCAGAGAGTCCCTGAACCTTGGAGCAAGGAGAGATGTAACATA		intron sense-overlapping	NM_001256024	ARHGAP22	rho GTPase-activating protein 22 isoform 1	-	49654067	49813176	320.552	226.788	8.31976	8.01255
ASHGA5P019950	1.23731	up	noncoding	ENST00000505718	ARHGAP22-IT1	GENCODE	470	chr10	-	49718567	49719632		ATCAACAACTTCTGGAAGCAGAGAGTCCCTGAACCTTGGAGCAAGGAGAGATGTAACATA		intron sense-overlapping	NM_001256025	ARHGAP22	rho GTPase-activating protein 22 isoform 2	-	49654067	49860561	320.552	226.788	8.31976	8.01255
ASHGA5P019950	1.23731	up	noncoding	ENST00000505718	ARHGAP22-IT1	GENCODE	470	chr10	-	49718567	49719632		ATCAACAACTTCTGGAAGCAGAGAGTCCCTGAACCTTGGAGCAAGGAGAGATGTAACATA		intron sense-overlapping	NM_021226	ARHGAP22	rho GTPase-activating protein 22 isoform 3	-	49654067	49813176	320.552	226.788	8.31976	8.01255
ASHGA5P033263	1.02025	up	noncoding	ENST00000582348	RP5-1171I10.4	GENCODE	558	chr17	+	56414696	56429104		TTGCATTTCCCCCTCTGCCTTCTGCTACTCAAGCCCCCAGGGATGAGGTGACAGTTAACC		intronic antisense	NM_003168	SUPT4H1	transcription elongation factor SPT4	-	56422538	56429563	12399.9	10376.8	13.5755	13.5466
ASHGA5P057442	1.15065	up	noncoding	TCONS_00017391	XLOC_008269	LincRNAs identified by Cabili et al	435	chrX	-	154644931	154649138		CACACATTTGTGCCTATAAAGCTGCTGCAACAAACAGACCATGGCTCAGTGGAGTGTTTT		intergenic							36.6219	32.5386	5.10584	4.9034
ASHGA5P048611	1.09394	up	noncoding	TCONS_00003564	XLOC_001338	LincRNAs identified by Cabili et al	525	chr2	+	9705817	9708996		GCATCTCTTCAGGCAGGCCCTGTCAGAGGCAGGTTAGTATTTTTATTTTACTTCTTTTTT		intergenic							41.6324	38.4877	5.30229	5.17276
ASHGA5P027893	1.05923	up	noncoding	AK091319R		LincRNAs identified by Khalil et al	2297	chrX	-	102851535	102853832		TGTGCTCCATTTTGAAGATAAAAAGACAGCTGGTCCTGGACCCTAAGTCTGTGGACTCTA		intergenic							77.2651	69.2002	6.21855	6.13553
ASHGA5P021342	1.02613	up	noncoding	ENST00000530352	RP11-646J21.5	GENCODE	376	chr11	+	33796250	33797216	ENST00000533046	CTTTGCCAAGTATGGTGTAAGGGGCTTTGGGGAATCCAGACAGACCTGGACTTCACACGC		bidirectional	NM_012175	FBXO3	F-box only protein 3 isoform 1	-	33762489	33796071	95.5833	87.446	6.53892	6.5017
ASHGA5P021342	1.02613	up	noncoding	ENST00000530352	RP11-646J21.5	GENCODE	376	chr11	+	33796250	33797216	ENST00000533046	CTTTGCCAAGTATGGTGTAAGGGGCTTTGGGGAATCCAGACAGACCTGGACTTCACACGC		bidirectional	NM_033406	FBXO3	F-box only protein 3 isoform 2	-	33768290	33796071	95.5833	87.446	6.53892	6.5017
ASHGA5P026999	1.02843	up	noncoding	ENST00000417058	CD27-AS1	GENCODE	1504	chr12	-	6548323	6556939		GCCGCTGTCAAGAGAAAAGCATCTATTACAGTTACATTTTTAAGTTAAGTAGACTGAAGA	678655	intronic antisense	NM_001242	CD27	CD27 antigen precursor	+	6554050	6560884	60.3687	57.299	5.85779	5.81734
ASHGA5P051591	1.07397	up	noncoding	uc003dpu.3	LOC401074	UCSC_knowngene	1443	chr3	+	75721431	75728454	NR_040005	TCTCGTGTTCAGGGTAGTATGGACGTGGACAATGGCAGTGGCCCCTGGCTGGCCCAAGAG	401074	intergenic							169.518	142.85	7.38911	7.28616
ASHGA5P025770	1.05028	up	noncoding	NR_034108	TRAF3IP2-AS1	RefSeq	4943	chr6	+	111804674	111923497		TGTGGTTTCTGTCGGCTTTCTCCATATTTACGTGCTTGTAACTCTGGCATGACCTTTGCT	643749	intronic antisense	NM_001164281	TRAF3IP2	adapter protein CIKS isoform 3	-	111876580	111927477	2227.19	1751.03	11.1168	11.046
ASHGA5P025770	1.05028	up	noncoding	NR_034108	TRAF3IP2-AS1	RefSeq	4943	chr6	+	111804674	111923497		TGTGGTTTCTGTCGGCTTTCTCCATATTTACGTGCTTGTAACTCTGGCATGACCTTTGCT	643749	intronic antisense	NM_001164283	TRAF3IP2	adapter protein CIKS isoform 5	-	111876580	111888563	2227.19	1751.03	11.1168	11.046
ASHGA5P025770	1.05028	up	noncoding	NR_034108	TRAF3IP2-AS1	RefSeq	4943	chr6	+	111804674	111923497		TGTGGTTTCTGTCGGCTTTCTCCATATTTACGTGCTTGTAACTCTGGCATGACCTTTGCT	643749	intronic antisense	NM_147686	TRAF3IP2	adapter protein CIKS isoform 2	-	111876580	111927477	2227.19	1751.03	11.1168	11.046
ASHGA5P029561	1.1847	up	noncoding	ENST00000569625	RP11-1012E15.1	GENCODE	600	chr14	+	56382444	56383044		TAAATTATGAAAGCTTTCCTCAGTACTCCTGCCCTATGATCCTTCCCTCACTTCATTAAG		intergenic							7112.18	4975.15	12.7979	12.5533
ASHGA5P053436	1.07075	up	noncoding	ENST00000524284	RP11-32K4.2	GENCODE	616	chr8	+	65289889	65291035		TGGTCCTCTGCAGGTTTGAACAGGGCTAGCAGGTCTCTCTCCGGATTTCTAGGGCTATGG		intergenic							2465.87	1892.05	11.2604	11.1618
ASHGA5P043070	1.33126	up	noncoding	NR_038371	FLJ45974	RefSeq	3484	chr7	-	53723201	53879624		GTATGTTACCAACACTCCCAAATTTCCTTTGATGTCAAAAAGCATTATTTTTCTCGAGTC	401337	intergenic							116.895	83.221	6.84237	6.42958
ASHGA5P033693	1.44411	up	noncoding	ENST00000579595	RP11-769O8.2	GENCODE	464	chr18	+	738057	739444		GCCAATAATAAGGCCTCTCAAATACCTACCACATATCTGAAGAGAAACTTTTAACAGTTT		intronic antisense	NM_005433	YES1	tyrosine-protein kinase Yes	-	721591	812327	57.5305	40.5077	5.78749	5.25731
ASHGA5P019315	1.8931	up	noncoding	ENST00000478005	TIPARP-AS1	GENCODE	554	chr3	-	156389652	156391722		GAAGTCAGTAAAACTAGGAGCTAAGAGAGTAATAACAGGATGGAGATGGAGTTTCATGAC		intronic antisense	ENST00000486483	TIPARP	TCDD-inducible poly(ADP-ribose) polymerase [Source:HGNC Symbol;Acc:23696]	+	156391023	156422928	142.492	73.0118	7.13808	6.21732
ASHGA5P027000	1.08611	up	noncoding	ENST00000447687	CD27-AS1	GENCODE	467	chr12	-	6556995	6557951	ENST00000536388, uc001qof.3, uc009zem.2	AGGAGTGATGACAAGGGTCTCCGCCAAAAGGGAAATGGAGGGGTTAAAGAAGCTGCTGGG	678655	intronic antisense	NM_001242	CD27	CD27 antigen precursor	+	6554050	6560884	489.667	383.615	8.91773	8.79856
ASHGA5P019652	2.99115	up	noncoding	uc003knd.3	FLJ35946	UCSC_knowngene	1861	chr5	-	98105321	98108787		CGAGGCTCAGATTATTTAAATTTTCCACAAATTTCTACGGATTAATTCAATGGCAGCTCA	503569	natural antisense	NM_001012761	RGMB	RGM domain family member B	+	98104998	98132198	27.7164	10.6794	4.70128	3.12058
ASHGA5P032523	1.08263	up	noncoding	NR_038230	LOC284080	RefSeq	2533	chr17	-	48127712	48133103		CTGCCGTACACTAGATGAAATGTGGTTATTTGCTCAGGTAGAAATAAAGACTAAAATACC	284080	bidirectional	NM_002204	ITGA3	integrin alpha-3 isoform a precursor	+	48133339	48167849	465.331	365.489	8.84601	8.73147
ASHGA5P032523	1.08263	up	noncoding	NR_038230	LOC284080	RefSeq	2533	chr17	-	48127712	48133103		CTGCCGTACACTAGATGAAATGTGGTTATTTGCTCAGGTAGAAATAAAGACTAAAATACC	284080	bidirectional	NM_005501	ITGA3	integrin alpha-3 isoform b precursor	+	48133339	48167849	465.331	365.489	8.84601	8.73147
ASHGA5P017515	1.12964	up	noncoding	ENST00000442583	CCDC144B	GENCODE	992	chr17	-	18491592	18509704		GAGTATAAAGGCAAGAAGGTAAATCAGTACTTGCTGTCCATTGTGGCCAGAAGCAGATTC	284047	intergenic							80.391	67.7255	6.27763	6.10177
ASHGA5P043682	1.00951	up	noncoding	ENST00000566570	RP11-760D2.11	GENCODE	4162	chr7	+	56560816	56564978		CATTTATCTGTGTGTCTGATGCCCTGACGTTTTTGCTGTAGGTAAGAAGTGATGGAGTGA		intergenic							597.692	498.22	9.20819	9.19453
ASHGA5P049334	1.43808	up	noncoding	ENST00000561510	RP11-345M22.1	GENCODE	1494	chr16	+	79747743	79832987		GAGAATCAAACAAGTAGGTGCTGCTGGTATTACTGTATTTTTCTCATTTTAAAGATCAGG		intergenic							68.7303	47.9378	6.04545	5.52131
ASHGA5P044700	1.96081	up	noncoding	TCONS_00015155	XLOC_007200	LincRNAs identified by Cabili et al	378	chr8	-	123790128	123792481		GAGGGCATCAACAGGTGGCCGTGTGCAGCGGAGAGGCCAATGGCGAGGACCCGGACTGGG		intergenic							15.9453	9.08623	3.87881	2.90736
ASHGA5P020122	2.13844	up	noncoding	ENST00000508519	RP11-33B1.1	GENCODE	849	chr4	+	120375993	120414592		TTTTGTTGAGGTTAGATCTTGGGACAGCCCACATACCTAGACAAACTTAGGCTTTCCAGC		intergenic							114.138	53.9725	6.80861	5.71206
ASHGA5P037405	1.15491	up	noncoding	uc021whv.1	Z49981	UCSC_knowngene	477	chr21	+	23539507	23539984		TTTGTCTCAGACCACTTCTAGCTACCCACATGGAAGCTAATATTCTTGGTCATTCAGCAG		intergenic							26.5608	24.3198	4.63781	4.43002
ASHGA5P035628	1.24579	up	noncoding	ENST00000418430	AC105760.2	GENCODE	2341	chr2	-	237968076	237994460		CAAAAATGGCTTACAGTTCTGGCCTCCAAATGCAGGATTTTAGCTACACTGCCACATCAT		natural antisense	NM_006710	COPS8	COP9 signalosome complex subunit 8 isoform 1	+	237994083	238007489	172.973	127.17	7.41904	7.10198
ASHGA5P035628	1.24579	up	noncoding	ENST00000418430	AC105760.2	GENCODE	2341	chr2	-	237968076	237994460		CAAAAATGGCTTACAGTTCTGGCCTCCAAATGCAGGATTTTAGCTACACTGCCACATCAT		natural antisense	NM_198189	COPS8	COP9 signalosome complex subunit 8 isoform 2	+	237994083	238007489	172.973	127.17	7.41904	7.10198
ASHGA5P034887	1.2032	up	noncoding	ENST00000430897	AC099344.2	GENCODE	1061	chr2	-	11497640	11505762		TTCTGATGAATGGCTATCTGCTTATGTGCCTAGATCCACCAGAGTTGTCACAGTTACAGG		intergenic							44.6952	37.5273	5.40366	5.13678
ASHGA5P025866	1.54343	up	noncoding	NR_045023	C17orf76-AS1	RefSeq	578	chr17	+	16342300	16373962		TATTGGAGCCAGGAGCCTGCCATGAGGCATGACTCCACAGTTTCTGCAACAACAGAGCCG	125144	intronic antisense	NM_001113567	FAM211A	leucine-rich repeat-containing protein FAM211A isoform 1	-	16345318	16395505	6364.73	3354.61	12.6272	12.001
ASHGA5P025866	1.54343	up	noncoding	NR_045023	C17orf76-AS1	RefSeq	578	chr17	+	16342300	16373962		TATTGGAGCCAGGAGCCTGCCATGAGGCATGACTCCACAGTTTCTGCAACAACAGAGCCG	125144	intronic antisense	NM_207387	FAM211A	leucine-rich repeat-containing protein FAM211A isoform 2	-	16345318	16395505	6364.73	3354.61	12.6272	12.001
ASHGA5P050336	1.20487	up	noncoding	TCONS_00001440	XLOC_000757	LincRNAs identified by Cabili et al	738	chr1	-	28567779	28573670		TGTTTTTCAGGCCTTCTGTCTTGAGCTCGTATTACTGCTGTTCACTGATGTATTGTAAAA		natural antisense	ENST00000468425	ATPIF1	ATPase inhibitory factor 1 [Source:HGNC Symbol;Acc:871]	+	28562652	28573417	114.91	90.1751	6.81799	6.54912
ASHGA5P037605	1.01262	up	noncoding	TCONS_00025610	XLOC_012442	LincRNAs identified by Cabili et al	341	chr17	-	32546136	32578928		TAGATCTTTGGAGTTAGGATCTTAGACTCTAAAATCATACGCCACTTCAGTAACTCATTG		intergenic							44.0262	43.353	5.38138	5.36329
ASHGA5P035715	1.07545	up	noncoding	ENST00000414538	AC092687.5	GENCODE	565	chr2	+	10729291	10744956		CAAACATAACTTTAAATCGATCATCGGTGAGAATATTAGGAAGACTCTACAAGGAGGAAA		natural antisense	NM_001261392	NOL10	nucleolar protein 10 isoform 2	-	10710891	10830113	28.6093	27.7281	4.74417	4.63922
ASHGA5P035715	1.07545	up	noncoding	ENST00000414538	AC092687.5	GENCODE	565	chr2	+	10729291	10744956		CAAACATAACTTTAAATCGATCATCGGTGAGAATATTAGGAAGACTCTACAAGGAGGAAA		natural antisense	NM_001261394	NOL10	nucleolar protein 10 isoform 3	-	10710891	10830113	28.6093	27.7281	4.74417	4.63922
ASHGA5P035715	1.07545	up	noncoding	ENST00000414538	AC092687.5	GENCODE	565	chr2	+	10729291	10744956		CAAACATAACTTTAAATCGATCATCGGTGAGAATATTAGGAAGACTCTACAAGGAGGAAA		natural antisense	NM_024894	NOL10	nucleolar protein 10 isoform 1	-	10710891	10830113	28.6093	27.7281	4.74417	4.63922
ASHGA5P058283	1.45827	up	noncoding	TCONS_00029174	XLOC_014113	LincRNAs identified by Cabili et al	399	chr21	-	45610321	45614187		TCTTTTCGTTTCTGCTCTGCCAGTAGTTTACAGCCAGAGGCAAAGCAAACCAAGAACACA		intergenic							32.9582	23.9189	4.94623	4.40198
ASHGA5P018500	1.15593	up	noncoding	ENST00000454321	RP11-536K7.3	GENCODE	381	chr10	-	5985466	5987712	ENST00000448685	CACCATGAAGGTGGCTGGCCAAGAGAAGCCTGCCCGGCGACGCTGAGGCACCGAACATGA		intergenic							74.2502	61.8276	6.15517	5.94611
ASHGA5P033325	1.54596	up	noncoding	ENST00000442382	RP4-781K5.6	GENCODE	3564	chr1	-	234805268	234831900		GGTCTGACACCCCATGACCTTTTTTGAGATTTGAGGTTATGCCATGTATTTGAGAATAAA		intergenic							116.186	72.5291	6.83453	6.20603
ASHGA5P048945	1.10097	up	noncoding	uc010bpo.3	WASH3P	UCSC_knowngene	1321	chr15	+	102513422	102516808	NR_003659, NR_024540, NR_028269, uc001aac.4, uc001aae.4, uc002cdq.3, uc002cdr.3, uc009viq.3, uc009vir.3, uc009vis.3, uc009vit.3, uc009viu.3, uc010scz.2, uc010sdh.2	TAAAGAACTGAGCAGAAACCAACAGTGTGCTTTTAATAAAGGATCTCTAGCTGTGCAGGA	374666	intergenic							864.629	661.309	9.748	9.60923
ASHGA5P046896	1.39211	up	noncoding	NR_038277	LOC100506939	RefSeq	2268	chr10	-	54056607	54073888		GCACAGATCACCTCTATTGTATGAAATCAGTTCTAATATCCTTATTTTCAACATGGTAGC	100506939	natural antisense	NM_001098512	PRKG1	cGMP-dependent protein kinase 1 isoform 1	+	52750910	54058110	26.9457	20.9081	4.6601	4.18283
ASHGA5P046896	1.39211	up	noncoding	NR_038277	LOC100506939	RefSeq	2268	chr10	-	54056607	54073888		GCACAGATCACCTCTATTGTATGAAATCAGTTCTAATATCCTTATTTTCAACATGGTAGC	100506939	natural antisense	NM_006258	PRKG1	cGMP-dependent protein kinase 1 isoform 2	+	52834233	54058110	26.9457	20.9081	4.6601	4.18283
ASHGA5P056887	1.60861	up	noncoding	TCONS_00010260	XLOC_004725	LincRNAs identified by Cabili et al	818	chr5	-	6705617	6710411		ATCTGTTACACAGGCCTAAAGCAACAACCAGAAGCCTTCCTGGGTGTTTACATTACAGCA		intergenic							29.4072	19.9453	4.78284	4.09703
ASHGA5P028217	1.60372	up	noncoding	ENST00000552735	RP11-486A14.1	pseudogene	133	chr12	+	93709346	93709479	NM_001256706, NM_001256707, NM_001256708, NM_001256709, NM_001256710, NM_001256711, NM_001256712, NM_014885, NR_046345	GAGCTCCAGTGGTAAATTTCCTAGATGTACAACTATTGATTTCATGATGTATTGTTCCAT									11349.8	5772.31	13.4589	12.7775
ASHGA5P043881	1.25403	up	noncoding	ENST00000453278	RP11-807H17.1	GENCODE	531	chr7	+	125071400	125101665		TGAGCAAAACTGATGCACTTGTCTCCCAGGATTAATCCATACAAGTCACCTCTAAAATTA		intergenic							47361.7	33022.8	15.4702	15.1437
ASHGA5P057224	1.02766	up	noncoding	TCONS_00014761	XLOC_006844	LincRNAs identified by Cabili et al	1184	chr8	+	74791942	74816962		CCCTTCCAAGGGTGCCACCACAGGTAACCATCAGAGAACACACTGCTATTTTCAAATAAA		intergenic							115.005	104.662	6.81977	6.7804
ASHGA5P039199	1.00169	up	noncoding	ENST00000414686	RP11-421L21.2	GENCODE	671	chr1	+	101461028	101461816		GGCCTCCCTATAATCAATGGTGTTAGTCAACTTTCAGATTTCCTTTAAATTACGTTTCTA		intronic antisense	NM_001077394	DPH5	diphthine synthase isoform a	-	101455179	101491362	530.589	445.978	9.03176	9.02932
ASHGA5P039199	1.00169	up	noncoding	ENST00000414686	RP11-421L21.2	GENCODE	671	chr1	+	101461028	101461816		GGCCTCCCTATAATCAATGGTGTTAGTCAACTTTCAGATTTCCTTTAAATTACGTTTCTA		intronic antisense	NM_001077395	DPH5	diphthine synthase isoform b	-	101455179	101491362	530.589	445.978	9.03176	9.02932
ASHGA5P039199	1.00169	up	noncoding	ENST00000414686	RP11-421L21.2	GENCODE	671	chr1	+	101461028	101461816		GGCCTCCCTATAATCAATGGTGTTAGTCAACTTTCAGATTTCCTTTAAATTACGTTTCTA		intronic antisense	NM_015958	DPH5	diphthine synthase isoform a	-	101455179	101491362	530.589	445.978	9.03176	9.02932
ASHGA5P033650	1.17437	up	noncoding	ENST00000584078	RP11-384E22.1	GENCODE	374	chr18	-	68667712	68678726		TACAGCACATTTAACTCTCCTGAGTCAACACAAAGAAAAAGAAACAGGATATTAGTAACG		intergenic							30.006	26.6927	4.81164	4.57975
ASHGA5P038947	1.05677	up	noncoding	ENST00000465249	RP11-197K3.1	GENCODE	622	chr3	+	114172439	114238979		TAAATGTAGGCTGACCTTTGGGGAATTATTTAAATTCTGAGTACCTCTGCTTCCTTCCCT		intronic antisense	NM_001164343	ZBTB20	zinc finger and BTB domain-containing protein 20 isoform 2	-	114056946	114790261	191.132	162.526	7.57006	7.4904
ASHGA5P038947	1.05677	up	noncoding	ENST00000465249	RP11-197K3.1	GENCODE	622	chr3	+	114172439	114238979		TAAATGTAGGCTGACCTTTGGGGAATTATTTAAATTCTGAGTACCTCTGCTTCCTTCCCT		intronic antisense	NM_001164344	ZBTB20	zinc finger and BTB domain-containing protein 20 isoform 2	-	114056946	114478124	191.132	162.526	7.57006	7.4904
ASHGA5P038947	1.05677	up	noncoding	ENST00000465249	RP11-197K3.1	GENCODE	622	chr3	+	114172439	114238979		TAAATGTAGGCTGACCTTTGGGGAATTATTTAAATTCTGAGTACCTCTGCTTCCTTCCCT		intronic antisense	NM_001164345	ZBTB20	zinc finger and BTB domain-containing protein 20 isoform 2	-	114056946	114478124	191.132	162.526	7.57006	7.4904
ASHGA5P038947	1.05677	up	noncoding	ENST00000465249	RP11-197K3.1	GENCODE	622	chr3	+	114172439	114238979		TAAATGTAGGCTGACCTTTGGGGAATTATTTAAATTCTGAGTACCTCTGCTTCCTTCCCT		intronic antisense	NM_001164346	ZBTB20	zinc finger and BTB domain-containing protein 20 isoform 2	-	114056946	114343792	191.132	162.526	7.57006	7.4904
ASHGA5P038947	1.05677	up	noncoding	ENST00000465249	RP11-197K3.1	GENCODE	622	chr3	+	114172439	114238979		TAAATGTAGGCTGACCTTTGGGGAATTATTTAAATTCTGAGTACCTCTGCTTCCTTCCCT		intronic antisense	NM_001164347	ZBTB20	zinc finger and BTB domain-containing protein 20 isoform 2	-	114056946	114343053	191.132	162.526	7.57006	7.4904
ASHGA5P038947	1.05677	up	noncoding	ENST00000465249	RP11-197K3.1	GENCODE	622	chr3	+	114172439	114238979		TAAATGTAGGCTGACCTTTGGGGAATTATTTAAATTCTGAGTACCTCTGCTTCCTTCCCT		intronic antisense	NM_015642	ZBTB20	zinc finger and BTB domain-containing protein 20 isoform 2	-	114056946	114866127	191.132	162.526	7.57006	7.4904
ASHGA5P045177	1.14606	up	noncoding	ENST00000449012	RP4-781K5.4	GENCODE	421	chr1	+	234791870	234816868	ENST00000453568	TTTGAAGGCGTCTCTCATAAGATGGCATTTGAGCAGAGACCTGAGGAAGTGAAAGATGGA		intergenic							21440.2	16150.8	14.3831	14.1865
ASHGA5P020874	1.13015	up	noncoding	ENST00000521230	RP11-100L22.2	GENCODE	407	chr8	-	93711969	93770770		TTCTCAGCTGATGGAGATGGTCAAGGGGTTACCGCCAGTCTGTTTCTTGCGCTGATAATT		intergenic							29.8813	27.5438	4.8051	4.62859
ASHGA5P058406	1.50111	up	noncoding	uc002suu.2	AK055967	UCSC_knowngene	3042	chr2	+	96192398	96198153		AGAAGAGGACGTGAAAAATGGACATTTCTGATACTGCCCAGCCACTACGGCACCACAACC		exon sense-overlapping	ENST00000442128	AC009237.1		+	96194602	96198143	170.325	106.551	7.39593	6.8099
ASHGA5P043586	1.47309	up	noncoding	TCONS_00018335	XLOC_008615	LincRNAs identified by Cabili et al	231	chr10	+	112874074	112877848		AATCTGAATGAATTGTCTGATGCATCGTGACTAAGCTTGGAATGTGCCAACTGTCCCCCA		intergenic							23.211	17.5648	4.44799	3.88915
ASHGA5P022590	1.51239	up	noncoding	ENST00000559248	HERC2P2	GENCODE	704	chr15	-	23308628	23311662		GTGCGAGCTTGTGCTTCTGTGGAATATATACATGTTGTAGAAAACTTGAAGTATATAGAA		intergenic							51.2811	34.784	5.61301	5.01618
ASHGA5P031951	1.37653	up	noncoding	TCONS_00029582	XLOC_014217	LincRNAs identified by Cabili et al	482	chr22	+	34587559	34614763		TGGAAAAGGGGAAAATGAATCATGCTACAGGCCAAGTGTCCATCACTGATTCCCAGAGAT		intergenic							74.6581	53.7005	6.16425	5.70322
ASHGA5P018436	1.40937	up	noncoding	ENST00000453558	HCG17	GENCODE	732	chr6	-	30201815	30293911		AGCTTAGCAGATACATTTCATCAATGAAGCCTTCTGGACCTGGAGTTTCCTATATGAGAA		bidirectional	NM_021253	TRIM39	tripartite motif-containing protein 39 isoform 1	+	30294620	30311506	374.965	232.563	8.54314	8.04809
ASHGA5P033019	1.79565	up	noncoding	TCONS_00029140	XLOC_014081	LincRNAs identified by Cabili et al	468	chr21	-	40400956	40402611	ENST00000440714	ATTGCTCACAGTGGCCAAATCTTGCCCTAAAGTCAAAGCTCTGAAGCACTGCACTAAAGA		intergenic							65.5082	37.4186	5.97728	5.13277
ASHGA5P056396	1.24838	up	noncoding	TCONS_00003876	XLOC_001676	LincRNAs identified by Cabili et al	598	chr2	+	132301071	132310702		AGCTCGACAGGAGTGAATTATCAGGAGTCGGCGCCGTGGCAGCTTTGGGATAACTTGAGG		intergenic							26.9025	23.0484	4.65793	4.33788
ASHGA5P025992	1.34927	up	noncoding	NR_048571	GPM6A	RefSeq	2865	chr4	-	176554087	176923842		ACACAAAAAGTTCATTATGCTGACATATCTTTTCATGTTGGCCTGGCTGGGAGTCACGGC	2823	exon sense-overlapping	NM_001261447	GPM6A	neuronal membrane glycoprotein M6-a isoform 2	-	176554087	176923842	89.3734	63.874	6.43395	6.00176
ASHGA5P025992	1.34927	up	noncoding	NR_048571	GPM6A	RefSeq	2865	chr4	-	176554087	176923842		ACACAAAAAGTTCATTATGCTGACATATCTTTTCATGTTGGCCTGGCTGGGAGTCACGGC	2823	exon sense-overlapping	NM_001261448	GPM6A	neuronal membrane glycoprotein M6-a isoform 4	-	176554087	176708827	89.3734	63.874	6.43395	6.00176
ASHGA5P025992	1.34927	up	noncoding	NR_048571	GPM6A	RefSeq	2865	chr4	-	176554087	176923842		ACACAAAAAGTTCATTATGCTGACATATCTTTTCATGTTGGCCTGGCTGGGAGTCACGGC	2823	exon sense-overlapping	NM_005277	GPM6A	neuronal membrane glycoprotein M6-a isoform 1	-	176554087	176923842	89.3734	63.874	6.43395	6.00176
ASHGA5P025992	1.34927	up	noncoding	NR_048571	GPM6A	RefSeq	2865	chr4	-	176554087	176923842		ACACAAAAAGTTCATTATGCTGACATATCTTTTCATGTTGGCCTGGCTGGGAGTCACGGC	2823	exon sense-overlapping	NM_201591	GPM6A	neuronal membrane glycoprotein M6-a isoform 1	-	176554087	176734265	89.3734	63.874	6.43395	6.00176
ASHGA5P025992	1.34927	up	noncoding	NR_048571	GPM6A	RefSeq	2865	chr4	-	176554087	176923842		ACACAAAAAGTTCATTATGCTGACATATCTTTTCATGTTGGCCTGGCTGGGAGTCACGGC	2823	exon sense-overlapping	NM_201592	GPM6A	neuronal membrane glycoprotein M6-a isoform 3	-	176554087	176923842	89.3734	63.874	6.43395	6.00176
ASHGA5P035979	1.25631	up	noncoding	ENST00000409054	LINC00152	GENCODE	1096	chr2	+	87754886	87883594		CAAGTATGAAGAGAATGTCGGGAGAGGAAGTGGTGGCTATGAGTCAGCATGAGTCATCTC	112597	intergenic							118.269	89.2629	6.86205	6.53286
ASHGA5P000376	1.40989	up	noncoding	chr20:24726575-24738550+	chr20:24726575-24738550	LincRNAs identified by Khalil et al	11975	chr20	+	24778575	24790550		TGACTGATCTGTGGGCTCCAGAAGCAACAAGCTCACGAAGGTCAGGAAAGGCCAGAGAGC		intergenic							42.3787	31.1896	5.32788	4.8323
ASHGA5P034015	1.88907	up	noncoding	TCONS_00004039	XLOC_001878	LincRNAs identified by Cabili et al	245	chr2	+	222688045	222688435		CATTTCTGAGTCACCATCCAGTGGGAAAAAGATCTCAAAAAGGGACCAAGAATAACAAAG		intergenic							228.544	113.422	7.83211	6.91444
ASHGA5P057145	1.02383	up	noncoding	TCONS_00013740	XLOC_006385	LincRNAs identified by Cabili et al	306	chr7	-	26109125	26112316		GAGTTTTCAGAACTAATATTTGGCGACTCCAAGGCCAGGGATAAAAATGAAGAGATGGAG		intergenic							19.2543	20.3363	4.16539	4.13142
ASHGA5P022520	1.0097	up	noncoding	ENST00000558297	RP11-17L5.4	GENCODE	565	chr15	-	79529222	79576287	ENST00000557790, ENST00000560452	TCCAGGCCTCTGAAGACAGTCATTCAGTCTAGAAGCTGAGATTCTTGAGTATGACTGTTC		intronic antisense	NM_001146341	ANKRD34C	ankyrin repeat domain-containing protein 34C	+	79575145	79590581	5.49962	5	2.43948	2.42556
ASHGA5P014585	2.46736	up	noncoding	ENST00000411596	AC073135.3	GENCODE	312	chr3	+	197836994	197838291		GAAGCACATACAAAGGCAAGGGAACTGTCCAGAAGAGGAACGCAGCTTGATGTTAAAAAA		intergenic							113.192	47.0879	6.79646	5.49349
ASHGA5P041270	2.79582	up	noncoding	NR_036530	LOC100289230	RefSeq	1876	chr5	+	98264837	98266713		CTGTCGTATTGTGCCATCAAACATGCTATTCGAAAAAAGATCTTGCCCAATTTGTAATAA	100289230	intergenic							42.4522	17.1045	5.33015	3.84688
ASHGA5P052875	1.36147	up	noncoding	uc003qlv.3	LOC729178	UCSC_knowngene	1551	chr6	-	147182941	147453122		TACAAAAAAAGAAAAAGAAAATTACTACTGTGAAGTGAAGTCTGAGCAACTGGGAAGAAA	729178	intergenic							143.32	99.2769	7.14682	6.70165
ASHGA5P016872	1.59664	up	noncoding	ENST00000435257	AC002076.10	GENCODE	527	chr7	+	93520224	93522913		TTGAAGGCATGAAGTTCAGGTGCTGGACACTTTTTGATTGTCTTTCGCTCATACAAAAAA		intron sense-overlapping	ENST00000455502	GNGT1	guanine nucleotide binding protein (G protein), gamma transducing activity polypeptide 1 [Source:HGNC Symbol;Acc:4411]	+	93220884	93540387	111.531	67.6904	6.77558	6.10055
ASHGA5P016872	1.59664	up	noncoding	ENST00000435257	AC002076.10	GENCODE	527	chr7	+	93520224	93522913		TTGAAGGCATGAAGTTCAGGTGCTGGACACTTTTTGATTGTCTTTCGCTCATACAAAAAA		natural antisense	ENST00000222543	TFPI2	tissue factor pathway inhibitor 2 [Source:HGNC Symbol;Acc:11761]	-	93514708	93520303	111.531	67.6904	6.77558	6.10055
ASHGA5P036696	1.34602	up	noncoding	TCONS_00026503	XLOC_012829	LincRNAs identified by Cabili et al	414	chr18	-	39766365	39805980		AATATCAGCTCCAAATGTCTTGGCCCATCTTTCCGTGTCCCCCTACCCTACACAGCCTCT		intergenic							39031.8	24606.2	15.201	14.7723
ASHGA5P052916	1.50674	up	noncoding	NR_038849	LOC100505633	RefSeq	1154	chr1	+	159931013	159948876		GCACTAAATTAGCTTTGTATGTTATTAAATGTGTCTCGTCAATGCTGTTGGCATTGTTTC	100505633	intergenic							109.969	70.2839	6.75138	6.15994
ASHGA5P000470	1.03516	up	noncoding	chr6:125885000-125895925+	chr6:125885000-125895925	LincRNAs identified by Khalil et al	10925	chr6	+	125843301	125854226		AATTTATTACTCCAATGGCAGTTATTTCCCTTGACCCTAGGATCACTTCTCTCTGTCTCC		intergenic							451.464	370.738	8.8008	8.75095
ASHGA5P052790	1.24438	up	noncoding	NR_003038	SNHG5	RefSeq	524	chr6	-	86386724	86388451	uc003plb.4	TAATTTTGGATTATGTTCCTTTTTGTTATTACTTTTAAATAGGTCCTGAAATAACATGGG	387066	intergenic							9820.26	6557.51	13.2435	12.9281
ASHGA5P022645	1.7881	up	noncoding	ENST00000560306	RP11-182J1.9	GENCODE	666	chr15	+	85114364	85121624		AACATAAAACCGCAGGCTGCAGCATATCATGAGTGATGAGATCTGTGTACAGGTGACTGA		intergenic							20.1815	13.0605	4.2298	3.39137
ASHGA5P022992	1.44347	up	noncoding	ENST00000567230	RP11-299H22.5	GENCODE	589	chr15	-	62555442	62558483		AGTGGCATTTGAGGCTGGCTTGAAGATTTAAGGTGAAACCAAGTGAGTGTCTCCTATTGG		intergenic							3919.18	2239.16	11.9234	11.3939
ASHGA5P039951	1.22098	up	noncoding	ENST00000508135	RP11-4O3.2	GENCODE	2672	chr4	+	58586200	58590821		CCTCCTGTAGCTGGTTTCTTTTATAATCTCTTTGTCTCATGAAAAGAAAGGGCAATTTAT		intergenic							405.566	286.724	8.64929	8.36124
ASHGA5P026384	1.27746	up	noncoding	ENST00000529219	RP11-347H15.4	GENCODE	500	chr11	+	50257788	50263827	ENST00000525654	GTAGTTGAAAACTCAGACCAAGCACAGTGTTTATATCGGTCAAAACTGGAAAACTATGTC		intergenic							162.046	117.018	7.32149	6.96821
ASHGA5P041123	3.01411	up	noncoding	ENST00000515227	RP11-434D9.1	GENCODE	666	chr5	+	67089047	67101066	ENST00000504068	GAAAGGCTGAGTCTTATAGGGTGTGATTTGGTTCTAGACATGCTTATGTTACTTTTTATA		intergenic							112.599	39.0578	6.78924	5.19751
ASHGA5P008640	1.18488	up	noncoding	ENST00000345111	RP11-173C20.1	GENCODE	2126	chr12	+	127227281	127230782	ENST00000537374	GGGAAAACAGAGAGTCAAGGGATTGGATTGTGGATTGCATTGGTGGTTTTCCTCAGTTTC		intergenic							33.9255	29.647	4.99371	4.74897
ASHGA5P047879	1.36253	up	noncoding	TCONS_00014122	XLOC_006073	LincRNAs identified by Cabili et al	1221	chr7	+	45241392	45243749		AAAGCCATTTTAGGACATTTTTGCACTTCAGGACATTGGCTTATGGTGGGTCAGGGGAGT		intergenic							33.5061	25.7851	4.973	4.52671
ASHGA5P045223	1.70322	up	noncoding	uc004abd.1	DQ573539	UCSC_knowngene	1713	chr9	-	38566269	38567982	ENST00000433980, ENST00000437267, ENST00000565670	GAGATACTATTTTTTCAAAAGGTCACCCAGGAATTGATAGTGTTGAATGACTAGATACTC		intron sense-overlapping	ENST00000313339	ANKRD18A	ankyrin repeat domain 18A [Source:HGNC Symbol;Acc:23643]	-	38540565	38577204	1099.79	546.204	10.0967	9.32848
ASHGA5P015708	1.50775	up	noncoding	ENST00000422825	ZNF815P	GENCODE	805	chr7	+	5886952	5893996		CTAGGCAGAGAAAGCTGACTTCATGAGACCGAGGATCTCGTTCGTTGATCGATGCTACAT		intergenic							136.088	85.8302	7.0664	6.47399
ASHGA5P051806	1.29768	up	noncoding	ENST00000444571	RP11-29A1.3	GENCODE	570	chr3	+	184880658	184898371		TGCTTGAGGGGTATGTGGATCTGTCTTTTGGTTGTGGGTACTTTAAGTGATGAGAAGTTT		intergenic							85.7552	63.6081	6.36956	5.99362
ASHGA5P019439	1.42394	up	noncoding	NR_033798	CAST	RefSeq	1809	chr5	+	96079243	96109116		CTTTATATTTGTGTGAGGACTTCTGCATCTTACAGTCAGCACAGAACACACTGAGACTTG	831	exon sense-overlapping	NM_001042440	CAST	calpastatin isoform f	+	95997906	96110385	587.068	352.177	9.18219	8.6723
ASHGA5P019439	1.42394	up	noncoding	NR_033798	CAST	RefSeq	1809	chr5	+	96079243	96109116		CTTTATATTTGTGTGAGGACTTCTGCATCTTACAGTCAGCACAGAACACACTGAGACTTG	831	exon sense-overlapping	NM_001190442	CAST	calpastatin isoform m	+	95997740	96110385	587.068	352.177	9.18219	8.6723
ASHGA5P019439	1.42394	up	noncoding	NR_033798	CAST	RefSeq	1809	chr5	+	96079243	96109116		CTTTATATTTGTGTGAGGACTTCTGCATCTTACAGTCAGCACAGAACACACTGAGACTTG	831	exon sense-overlapping	NM_173060	CAST	calpastatin isoform b	+	96038492	96110385	587.068	352.177	9.18219	8.6723
ASHGA5P019439	1.42394	up	noncoding	NR_033798	CAST	RefSeq	1809	chr5	+	96079243	96109116		CTTTATATTTGTGTGAGGACTTCTGCATCTTACAGTCAGCACAGAACACACTGAGACTTG	831	natural antisense	NM_016442	ERAP1	endoplasmic reticulum aminopeptidase 1 isoform a precursor	-	96096513	96143892	587.068	352.177	9.18219	8.6723
ASHGA5P051501	1.22788	up	noncoding	ENST00000467933	SRGAP2B	GENCODE	1334	chr1	+	143913614	144094424		TATGGGCCCCATCGGTCGATAGAAAACGGGCGGTGATTGGTAAAGGGGTGGGCTCTACTT	647135	bidirectional	NM_207418	FAM72D	protein FAM72D	-	143896451	143913143	26.1204	22.7543	4.61425	4.31808
ASHGA5P052117	1.69751	up	noncoding	ENST00000514881	RP11-597D13.7	pseudogene	919	chr4	+	159198909	159199828	NM_022831	CTGGGCCAATTGTAATAGAACTATACAAGAAACCCACTGACTTTAAAAGAAAGAAATTGC									2005.74	977.817	10.9613	10.1979
ASHGA5P053371	3.13513	up	noncoding	uc003xna.3	ADAM5P	UCSC_knowngene	1870	chr8	+	39172181	39274897	uc003xnb.3, uc003xnc.3	CAGTCTCTAACAACCTTGAATGCTACTGCTTGGAGAGAGGAGAGTAACAAATACATTATC	255926	intergenic							121.972	40.5326	6.90664	5.25812
ASHGA5P015083	1.01023	up	noncoding	uc001gdd.2	LOC400794	UCSC_knowngene	1665	chr1	-	165446078	165551341		GTGAGAATGGGACCCTGGTTGAAGGAACCTGTTGTTCTTATGGTGGAGGGCAGAAACCCA	400794	intronic antisense	NM_001005214	LRRC52	leucine-rich repeat-containing protein 52 precursor	+	165513477	165533185	88.3472	81.6068	6.41462	6.39994
ASHGA5P028162	1.07566	up	noncoding	ENST00000548963	RP11-754N21.1	GENCODE	693	chr12	+	78790386	78876589		GCTTGGAATCTTACTCTTGTGCATTGAAGAAGGATAAGAAACAGGAAGAAGTAGAAGAAT		intergenic							34.8999	33.0788	5.03661	4.93139
ASHGA5P034599	1.12929	up	noncoding	TCONS_00004770	XLOC_001453	LincRNAs identified by Cabili et al	494	chr2	+	45401106	45402546		TCCTTCACTCGTCTCAGAAAACAACTCACGACTACAGCAGCTTGCATGATGAAATGGAAG		intergenic							84.1541	70.5493	6.33962	6.1642
ASHGA5P053097	1.75556	up	noncoding	ENST00000419314	CCT6P3	GENCODE	3702	chr7	+	64498731	64535091		CAGGACTTGTATATGAGTATACATTGGTAAGTGTATTTTCTTCCTGAGGGTAATAGAACT	643180	intergenic							72.8546	42.12	6.12892	5.31698
ASHGA5P058265	2.19472	up	noncoding	TCONS_00028969	XLOC_013866	LincRNAs identified by Cabili et al	4533	chr21	+	17259152	17267300		TTATGTTGGCAGATGCTGATTGATCTAATCTCGGCTTGTGGAGGACGAACCTCTTGCATA		intergenic							36.2792	18.2921	5.09404	3.96001
ASHGA5P014930	1.1903	up	noncoding	ENST00000414886	AC093901.1	GENCODE	778	chr2	-	118889703	118943962		CCTCTCTATGCTTGTGGCCTTGAACAACTGCCTTAACATTGCTGAAACTCAATATCTTCA		intergenic							144.225	112.909	7.15801	6.90669
ASHGA5P035426	1.47291	up	noncoding	ENST00000458314	AC078883.3	GENCODE	512	chr2	-	173328989	173330750		CAAATAGTCTCTATTACCTTCATGCCTGTTGGGTCCCAATAAAGGAATCATTCCAATAAA		intronic antisense	NM_000210	ITGA6	integrin alpha-6 isoform b precursor	+	173292313	173371181	1952.48	1089.66	10.9235	10.3649
ASHGA5P035426	1.47291	up	noncoding	ENST00000458314	AC078883.3	GENCODE	512	chr2	-	173328989	173330750		CAAATAGTCTCTATTACCTTCATGCCTGTTGGGTCCCAATAAAGGAATCATTCCAATAAA		intronic antisense	NM_001079818	ITGA6	integrin alpha-6 isoform a precursor	+	173292313	173371181	1952.48	1089.66	10.9235	10.3649
ASHGA5P038939	1.35286	up	noncoding	uc021xcj.1	AX747104	UCSC_knowngene	3171	chr3	+	111442569	111445740		GGCTTTTTACCCCTAGGAAATAATTGTCCAAGTATATATCTCGTCTTCTTTCTTGTAACT		intron sense-overlapping	NM_001185106	PLCXD2	PI-PLC X domain-containing protein 2 isoform a	+	111393522	111565294	254.021	168.32	7.98235	7.54635
ASHGA5P038939	1.35286	up	noncoding	uc021xcj.1	AX747104	UCSC_knowngene	3171	chr3	+	111442569	111445740		GGCTTTTTACCCCTAGGAAATAATTGTCCAAGTATATATCTCGTCTTCTTTCTTGTAACT		intron sense-overlapping	NM_153268	PLCXD2	PI-PLC X domain-containing protein 2 isoform b	+	111393522	111565294	254.021	168.32	7.98235	7.54635
ASHGA5P045528	1.41188	up	noncoding	ENST00000564021	LL09NC01-254D11.1	GENCODE	1990	chr9	-	136476919	136498221		GAGTTTGGTGGTGACCATCTGGCATTGCGATCCAAATGAAATCTATTCAGTGTAGTCACC		intergenic							49.754	35.9367	5.56648	5.06886
ASHGA5P018986	1.49444	up	noncoding	ENST00000463366	SRGAP2B	GENCODE	537	chr1	+	143913616	143916100		TAGAAAACGGGCGGTGATTGGCAAGTGAACCGGAGCAAACGACTTCCGATCCAGTCTGCG	647135	bidirectional	NM_207418	FAM72D	protein FAM72D	-	143896451	143913143	142.2	90.5554	7.13505	6.55544
ASHGA5P039641	1.22018	up	noncoding	ENST00000503593	RP11-203B7.1	GENCODE	522	chr4	-	146998997	147029309		AACTGGTCATCATTTCAAAAGCCCCATTTGGAAGCAAACCCTGGGATTATCAAGGAGAGA		intergenic							50.8084	41.9728	5.59973	5.31263
ASHGA5P038318	1.92386	up	noncoding	ENST00000465795	RP11-354H21.1	GENCODE	409	chr3	-	78087855	78095945		CAGGTTAATCACGCTACCCTTGGTTATCATCACATGTATTTCTGAAATTGTCTTTTACAT		intergenic							97.375	51.0845	6.56496	5.62096
ASHGA5P042967	1.20743	up	noncoding	ENST00000446246	AC004593.3	GENCODE	798	chr7	-	29239155	29248586		GGACTAGTACTCCTCATCTGAGTAAATAATTTCTCTCACAGGGTTAATTTTAGCTTTGCA		intronic antisense	NM_004067	CHN2	beta-chimaerin isoform 2	+	29234120	29553944	52.896	44.01	5.65871	5.38677
ASHGA5P030519	1.4926	up	noncoding	TCONS_00008505	XLOC_003985	LincRNAs identified by Cabili et al	242	chr4	-	76103903	76105665		TCCTTGATGTGATCTCTGCACATCATGCAACCCTAAACCTAAATATATTCTCTGTGTGGG		intergenic							95.3177	62.2449	6.53487	5.95704
ASHGA5P039079	1.04139	up	noncoding	ENST00000422980	DPYD-AS1	GENCODE	533	chr1	+	97561478	97788511		GCAGCTCCTGTTTTCTTGTTGTTACTTTAGGAATGGGTGTCTATTGTTTTAAGGATTAAA	100873932	natural antisense	NM_000110	DPYD	dihydropyrimidine dehydrogenase [NADP(+)] isoform 1	-	97543299	98386615	141.871	124.857	7.13167	7.07316
ASHGA5P015739	1.42536	up	noncoding	ENST00000423083	NCF1B	GENCODE	1516	chr7	+	72634673	72649979	ENST00000435988	AGCTGTTGAGGAAAGACGACGTCACAGGCTACTTCCCGTCCATGTACCTGCAAAAGTCAG	654816	intergenic							273.204	171.896	8.09201	7.58068
ASHGA5P048164	1.70507	up	noncoding	TCONS_00014043	XLOC_005955	LincRNAs identified by Cabili et al	979	chr7	+	389823	391347	TCONS_00013287, TCONS_00013288, TCONS_00014042	GAGAGCAAGGCCGAAGAAACCCGCACTGGCACACATCAAAACACAACTCCACACAACGTC		intergenic							297.875	158.224	8.21959	7.44976
ASHGA5P039139	1.03685	up	noncoding	ENST00000496247	RP11-637O11.2	GENCODE	545	chr3	+	168006340	168009016		TTCCCTGCTTCTGAAAACTTAATTTGATATTTTCTCTTACACACCAAGCAGTGATTTGCA		intergenic							125.165	112.165	6.9452	6.89299
ASHGA5P038463	1.66987	up	noncoding	ENST00000492725	ATP1B3-AS1	GENCODE	376	chr3	-	141637093	141637863		CTGGGTTTTTCATTAACATTTCCCCCAACTATTCTAGAAGCAAAGGATACGTAATAGATA		intronic antisense	NM_001679	ATP1B3	sodium/potassium-transporting ATPase subunit beta-3	+	141595469	141645382	177.306	100.182	7.45652	6.71678
ASHGA5P045198	1.20196	up	noncoding	TCONS_00002095	XLOC_000303	LincRNAs identified by Cabili et al	1191	chr1	+	95149855	95153875		TAACTTCTGCACTGGTTGACATTCACCGCTTTGAACATAGAAACAAGAGGCTCCCTGTAG		intergenic							188.933	142.889	7.55202	7.28663
ASHGA5P023244	1.44311	up	noncoding	NR_028503	MIR22HG	RefSeq	1852	chr17	-	1614797	1619566		ACAACCCAAGGAAGCTGTGTCTGTTCGATTTGGTGGGAGGAGATGTGCAGGGAGCTGTAT	84981	bidirectional	NM_001163673	WDR81	WD repeat-containing protein 81 isoform 3	+	1619816	1641893	96.4696	64.6817	6.55273	6.02355
ASHGA5P023244	1.44311	up	noncoding	NR_028503	MIR22HG	RefSeq	1852	chr17	-	1614797	1619566		ACAACCCAAGGAAGCTGTGTCTGTTCGATTTGGTGGGAGGAGATGTGCAGGGAGCTGTAT	84981	bidirectional	NM_152348	WDR81	WD repeat-containing protein 81 isoform 2	+	1619816	1641893	96.4696	64.6817	6.55273	6.02355
ASHGA5P040368	2.57003	up	noncoding	ENST00000512939	RP11-351N6.1	GENCODE	487	chr5	-	26382627	26399928		GCATAGAGACAGATCAATAAGAAAGGTTGAAAATACACAAAGTCATCTCATCACATGAAG		intergenic							24.7966	11.1816	4.5358	3.17402
ASHGA5P041201	1.11912	up	noncoding	ENST00000396880	ATG10-IT1	GENCODE	487	chr5	+	81287813	81288300		ATATTGTCCCTCATACCTTCAGGTTTTATGGTCACTCATACAATCACTTTGGCACCATCC		intron sense-overlapping	NM_001131028	ATG10	ubiquitin-like-conjugating enzyme ATG10	+	81267843	81551216	97.5217	81.9477	6.56751	6.40515
ASHGA5P041201	1.11912	up	noncoding	ENST00000396880	ATG10-IT1	GENCODE	487	chr5	+	81287813	81288300		ATATTGTCCCTCATACCTTCAGGTTTTATGGTCACTCATACAATCACTTTGGCACCATCC		intron sense-overlapping	NM_031482	ATG10	ubiquitin-like-conjugating enzyme ATG10	+	81267843	81551216	97.5217	81.9477	6.56751	6.40515
ASHGA5P015549	1.11689	up	noncoding	uc003uiq.4	TP53TG1	UCSC_knowngene	470	chr7	-	86954663	86974831		GCCCACGAAGGTTTAACCACCAAGGACTCTGAGAGCTGGCAGGTCTGAGTAACCCTGGTA	11257	bidirectional	NM_001143935	CROT	peroxisomal carnitine O-octanoyltransferase isoform 1	+	86974950	87029112	5198.61	3792.43	12.3275	12.168
ASHGA5P015549	1.11689	up	noncoding	uc003uiq.4	TP53TG1	UCSC_knowngene	470	chr7	-	86954663	86974831		GCCCACGAAGGTTTAACCACCAAGGACTCTGAGAGCTGGCAGGTCTGAGTAACCCTGGTA	11257	bidirectional	NM_001243745	CROT	peroxisomal carnitine O-octanoyltransferase isoform 3	+	86974950	86989425	5198.61	3792.43	12.3275	12.168
ASHGA5P015549	1.11689	up	noncoding	uc003uiq.4	TP53TG1	UCSC_knowngene	470	chr7	-	86954663	86974831		GCCCACGAAGGTTTAACCACCAAGGACTCTGAGAGCTGGCAGGTCTGAGTAACCCTGGTA	11257	bidirectional	NM_021151	CROT	peroxisomal carnitine O-octanoyltransferase isoform 2	+	86974950	87029112	5198.61	3792.43	12.3275	12.168
ASHGA5P023596	1.0097	up	noncoding	HMlincRNA1+	HMlincRNA1	LincRNAs identified by Khalil et al	21781	chr8	+	53507546	53529327		GACTAACGTTAAGAGCTATCAATTAGTGGACATTAATAAAGAGTTTTCACAGCTTTCCAG		intergenic							5.49962	5	2.43948	2.42556
ASHGA5P019257	1.77024	up	noncoding	ENST00000475455	TFP1	pseudogene	1573	chr3	+	133407035	133431646		CTACAGTAAGGCTATTATGTCATGGCTGTGGTTAAGAAATCAGATGCTGATGTCACCTGG									46.8211	27.8647	5.47275	4.64881
ASHGA5P033035	1.13573	up	noncoding	TCONS_00029300	XLOC_014097	LincRNAs identified by Cabili et al	1982	chr21	-	44255638	44257805		AATATGCAAACACCCAAAAGGTTATAGGCTGTGCATTGTGTCACAAGGGAGCACTGTGCA		intergenic							26.2785	24.4815	4.62436	4.44075
ASHGA5P013915	1.26903	up	noncoding	ENST00000584585	PLEKHM1P	GENCODE	1168	chr17	-	62816811	62833254	ENST00000397718, ENST00000578036, ENST00000580919, ENST00000582986, uc002jev.3	GCCCGCTTGCAACTACAGCGGAAGGAATCTCTGGATTCCATTTCCCATTCTTCAGGCTCT	440456	intergenic							699.819	465.098	9.43631	9.09259
ASHGA5P041654	1.6028	up	noncoding	ENST00000444978	RP3-380B8.3	GENCODE	361	chr6	-	5875163	5876103		TGATATAATCCAGAAAAGCAAGAGTCCACCCAAAGTCAGAAGAGAAGAATTCAGAAGAGT		intergenic							78.7889	49.3781	6.24789	5.5673
ASHGA5P055056	1.20517	up	noncoding	ENST00000528083	RP11-727A23.5	GENCODE	547	chr11	-	82903314	82904705	uc009yvh.3	AACAGAATTCAGGACAACCCTTTATTATTAAGGTGATCACTGGCTCAGTCGGACTGGGGT		bidirectional	NM_182603	ANKRD42	ankyrin repeat domain-containing protein 42	+	82905290	82960013	100.538	78.8117	6.61124	6.342
ASHGA5P045797	1.00894	up	noncoding	NR_049794	LOC100506834	RefSeq	4388	chr9	+	89563612	89616948		CCCTTATTATTTAAATCTCAGCAGAATGTGAAGTTATGTTCCCCCTTTGTATCCATTTTT	100506834	intergenic							381.024	326.155	8.56537	8.55253
ASHGA5P037038	1.90781	up	noncoding	ENST00000414199	RP5-1066H13.4	GENCODE	471	chr1	+	41329585	41342342		TTTTTGCAAAGTGTAAAAAGCTACACCCTGGAATTTATTCTCCTGAATCTTTCTCTACAG		intergenic							88.6264	46.8831	6.41965	5.48773
ASHGA5P017238	1.43792	up	noncoding	ENST00000439196	AC092159.3	GENCODE	571	chr2	-	692082	693235		TGGGCTCCTGCCAATATAAATTACCCTCAGCAAGACGACACCAGGGAGAAATGCTCCCAC		intergenic							111.192	74.2896	6.77003	6.24604
ASHGA5P031543	1.11202	up	noncoding	ENST00000565359	RP11-552C15.1	GENCODE	520	chr16	+	12639338	12640541		CCCACCCAAGGATAATACAGGTGGAACATAAATGCCAGATTGATCTATTGATAATTATAA		intron sense-overlapping	NM_032167	SNX29	sorting nexin-29	+	12070601	12668146	31.7478	29.4623	4.89097	4.73778
ASHGA5P037907	1.38828	up	noncoding	TCONS_00024755	XLOC_012039	LincRNAs identified by Cabili et al	219	chr16	-	85995140	85995657		ATGTCTGGAAGAGCAACACAGCTGGCTTCCAACTCAACTTGATCCCCACACCAGGAACCC		intergenic							263.684	170.285	8.0379	7.56461
ASHGA5P019489	1.38692	up	noncoding	ENST00000487582	TMEM198B	GENCODE	1581	chr12	+	56226630	56230030		TGAAATAGCCTTTTAAATGTTCACCTCAGCTTGCCTCACAGTGGGTCTGTTCCTGGTTTC	440104	natural antisense	NM_002429	MMP19	matrix metalloproteinase-19 isoform rasi-1 preproprotein	-	56229213	56236735	1217.85	728.887	10.2365	9.76464
ASHGA5P034050	1.46329	up	noncoding	TCONS_00005041	XLOC_001916	LincRNAs identified by Cabili et al	406	chr2	+	239463184	239468090		TGCTTAAATCCATCCCGCTAAGTGCTGGGGGCTTTATGCGCTATGGGACTCTCAGTCCGG		intergenic							130.118	84.3151	6.99926	6.45004
ASHGA5P040408	1.26593	up	noncoding	ENST00000510137	CTD-2263F21.1	GENCODE	337	chr5	-	38466264	38468441		GCAGAGCTGCCAAGCTGACCACTTAAGGCGCATGAGGAATAAACACTCGTTGCTGCATGC		intergenic							3983.18	2584.18	11.9483	11.6081
ASHGA5P016249	1.31855	up	noncoding	ENST00000428531	RP11-261N11.8	GENCODE	513	chr20	+	62000233	62002524		TGGTGGGTGGGACATGTCTACAAATAGCTCATCACGTCTCCAATCCAGAAGTGCTGTGTC		intergenic							3929.67	2458.93	11.9293	11.5304
ASHGA5P058185	1.42876	up	noncoding	TCONS_00027621	XLOC_013142	LincRNAs identified by Cabili et al	455	chr19	+	53727170	53727904		TCAAATCTTCCTTGTTCATAGCAGAGATGGGCAACCACCCATTCTGCCTTTGGGCTAAAT		intergenic							113.728	76.2134	6.80276	6.288
ASHGA5P040992	1.23659	up	noncoding	ENST00000506792	ANKRD33B-IT1	GENCODE	732	chr5	+	10594937	10596322		ATGCCTGGGGGATCTTTGTTTTTGGCATAAGCCGAACAGATTGTTCCAGGCCAGAAAAAA		intron sense-overlapping	NM_001164440	ANKRD33B	ankyrin repeat domain-containing protein 33B	+	10564434	10657928	54.3596	44.278	5.70041	5.39404
ASHGA5P048122	1.86095	up	noncoding	CD642394		LincRNAs identified by Khalil et al	752	chr3	-	163907665	163908407		GTGTTTCACCAATGCTCTTCAGTTATAACCTTATTACTTTCTGTCTAAGGAAAATGAAGG		intergenic							114.441	60.7605	6.81205	5.91601
ASHGA5P043567	2.34658	up	noncoding	ENST00000521159	HOXA-AS2	GENCODE	800	chr7	+	27162166	27173921		GGAACAACACTTTACCAGCCATTTGACCAATTAATTCTTTGGGGATAATTTTCTTGTAGT	285943	intronic antisense	NM_002141	HOXA4	homeobox protein Hox-A4	-	27168125	27170399	85.2399	37.3705	6.36116	5.1306
ASHGA5P043567	2.34658	up	noncoding	ENST00000521159	HOXA-AS2	GENCODE	800	chr7	+	27162166	27173921		GGAACAACACTTTACCAGCCATTTGACCAATTAATTCTTTGGGGATAATTTTCTTGTAGT	285943	natural antisense	NM_153631	HOXA3	homeobox protein Hox-A3 isoform a	-	27145808	27166639	85.2399	37.3705	6.36116	5.1306
ASHGA5P016449	1.31234	up	noncoding	ENST00000430518	AC018647.3	GENCODE	742	chr7	+	35756201	35759144		GATTCTTTCTATTCTTCCACCAGCCAAGGTGATGAGCACAAAAGGATCCATCTTATACAG		intergenic							37.9571	29.9592	5.15764	4.7655
ASHGA5P015711	1.1434	up	noncoding	ENST00000445909	RP1-127D3.4	GENCODE	442	chr1	-	171168385	171196864	ENST00000422841	CTCATGACCCAGGTACATGGTAAGCAGAGAGCATCACACCTGAGCAGCATTCTTACTCAG		natural antisense	NM_001460	FMO2	dimethylaniline monooxygenase [N-oxide-forming] 2	+	171154387	171181822	82.1179	68.2016	6.30568	6.11236
ASHGA5P040159	1.4033	up	noncoding	TCONS_00022712	XLOC_010998	LincRNAs identified by Cabili et al	613	chr14	-	38066368	38067552		CAGCTACTAATGGGAACTTTGCACAAAAGAATTAGTTTCTGACACACAATTCGCAGATAC		intron sense-overlapping	ENST00000540786	FOXA1	forkhead box A1 [Source:HGNC Symbol;Acc:5021]	-	38060253	38069245	37.766	28.054	5.14893	4.6601
ASHGA5P040159	1.4033	up	noncoding	TCONS_00022712	XLOC_010998	LincRNAs identified by Cabili et al	613	chr14	-	38066368	38067552		CAGCTACTAATGGGAACTTTGCACAAAAGAATTAGTTTCTGACACACAATTCGCAGATAC		intronic antisense	ENST00000556845	TTC6	tetratricopeptide repeat domain 6 [Source:HGNC Symbol;Acc:19739]	+	38065051	38091523	37.766	28.054	5.14893	4.6601
ASHGA5P053487	1.22652	up	noncoding	ENST00000519854	RP11-37B2.1	GENCODE	284	chr8	-	90629221	90635433	ENST00000520306	TTTGAAGAAGGCAAGCTTCATTAAAACCAACATCTTACTTGGCCTAAAACATCTTTGGAG		intergenic							451.085	315.582	8.79955	8.50498
ASHGA5P000047	3.25181	up	noncoding	AK026847		NRED	1683	chr1	+	82458559	82462210		GCTACTATATAGAACCACTCAGGAACAATAATGATAGGTATCAACGATACTGATTAGATG		intergenic							25.8167	8.98308	4.59518	2.89393
ASHGA5P029317	1.13022	up	noncoding	TCONS_00010873	XLOC_004700	LincRNAs identified by Cabili et al	715	chr5	-	1041183	1045593	TCONS_00010232	TCACTCACTAATTTACACCAAGTCACTCCCACTCATTCAGATACAGGCTGGTCCAGCGAC		intergenic							1042.13	767.213	10.0156	9.83899
ASHGA5P023409	1.27588	up	noncoding	ENST00000580336	LINC00470	GENCODE	408	chr18	-	1368290	1392186		CCACACCTAGTTTACCATCAGAGGACACAGCAGCAAGGTGCCATCCTAGAAGCAGAGAGC		intergenic							74.8572	57.2911	6.16833	5.81685
ASHGA5P015442	1.14547	up	noncoding	ENST00000420251	ZNRD1-AS1	GENCODE	2430	chr6	-	29968787	30028961		CACAAAATTGGAACGCAGTCGCGGGGTATATCCCCCTGAAAACCGTACGTTGCCAAATAA	80862	bidirectional	NM_014596	ZNRD1	DNA-directed RNA polymerase I subunit RPA12	+	30029035	30032686	41.3911	36.5511	5.29251	5.09657
ASHGA5P015442	1.14547	up	noncoding	ENST00000420251	ZNRD1-AS1	GENCODE	2430	chr6	-	29968787	30028961		CACAAAATTGGAACGCAGTCGCGGGGTATATCCCCCTGAAAACCGTACGTTGCCAAATAA	80862	bidirectional	NM_170783	ZNRD1	DNA-directed RNA polymerase I subunit RPA12	+	30029035	30032686	41.3911	36.5511	5.29251	5.09657
ASHGA5P023201	1.29673	up	noncoding	ENST00000573935	RP11-334C17.5	GENCODE	646	chr17	-	78175544	78178134	ENST00000573346	CTCCTGCCAGGAGGAGGAAGCCGAGGCAGGCTGGGTGCCATTTCCCTGTGGGCCTCTCTG		natural antisense	NM_001257970	CARD14	caspase recruitment domain-containing protein 14 isoform 3	+	78152306	78176430	761.126	497.661	9.56798	9.19309
ASHGA5P023201	1.29673	up	noncoding	ENST00000573935	RP11-334C17.5	GENCODE	646	chr17	-	78175544	78178134	ENST00000573346	CTCCTGCCAGGAGGAGGAAGCCGAGGCAGGCTGGGTGCCATTTCCCTGTGGGCCTCTCTG		natural antisense	NM_024110	CARD14	caspase recruitment domain-containing protein 14 isoform 1	+	78152306	78183130	761.126	497.661	9.56798	9.19309
ASHGA5P017777	1.28107	up	noncoding	ENST00000445651	GGT3P	GENCODE	368	chr22	-	18782043	18830912		AACAATCACAGTGTGGTGTCAGCACAGCGGCAGGTCACCGTTCAGGAAGGACCCTTGTAC		intergenic							46.4233	36.6953	5.45914	5.10179
ASHGA5P027771	1.68036	up	noncoding	TCONS_00010145	XLOC_004612	LincRNAs identified by Cabili et al	362	chr5	+	154496131	154499168		TGTTAAATTCTGCTACCTCACCAACGACAACTTGGACCTTGACCTCCAATGTGTGTTCGA		intergenic							217.289	120.051	7.7586	7.00983
ASHGA5P052368	1.07569	up	noncoding	ENST00000515570	AC010226.4	GENCODE	765	chr5	+	114938741	114956356		CAAAAGTCTGAAGTTCTCTGTGAAATGCCTACATGTAAGAATTAAGATAGATTTTAAAGA		natural antisense	NM_001164468	TMED7-TICAM2	TRAM adaptor with GOLD domain isoform 1 precursor	-	114914338	114961876	48.5751	45.1487	5.52909	5.42383
ASHGA5P052368	1.07569	up	noncoding	ENST00000515570	AC010226.4	GENCODE	765	chr5	+	114938741	114956356		CAAAAGTCTGAAGTTCTCTGTGAAATGCCTACATGTAAGAATTAAGATAGATTTTAAAGA		natural antisense	NM_001164469	TMED7-TICAM2	TRAM adaptor with GOLD domain isoform 2 precursor	-	114914338	114961876	48.5751	45.1487	5.52909	5.42383
ASHGA5P052368	1.07569	up	noncoding	ENST00000515570	AC010226.4	GENCODE	765	chr5	+	114938741	114956356		CAAAAGTCTGAAGTTCTCTGTGAAATGCCTACATGTAAGAATTAAGATAGATTTTAAAGA		natural antisense	NM_181836	TMED7	transmembrane emp24 domain-containing protein 7 precursor	-	114948904	114961876	48.5751	45.1487	5.52909	5.42383
ASHGA5P044368	3.55122	up	noncoding	ENST00000522123	RP11-731N10.1	GENCODE	814	chr8	-	83775013	83870931		CTACAAGATCTGCAGTTATGCTTCCTCTTACCCAATTTACAGATAATATATGTTTGTGGC		intergenic							1641.17	394.85	10.6684	8.84004
ASHGA5P032080	1.18941	up	noncoding	ENST00000574290	RP1-59D14.5	GENCODE	846	chr17	-	2278354	2282600		ACCATTGAAAAACTTGATGATGTCAGTGAAGTCCATGTTGTTGTCACGGATGATCTCTCG		natural antisense	NM_001098509	SGSM2	small G protein signaling modulator 2 isoform 2	+	2240807	2284348	20.2302	18.5773	4.23368	3.98343
ASHGA5P032080	1.18941	up	noncoding	ENST00000574290	RP1-59D14.5	GENCODE	846	chr17	-	2278354	2282600		ACCATTGAAAAACTTGATGATGTCAGTGAAGTCCATGTTGTTGTCACGGATGATCTCTCG		natural antisense	NM_014853	SGSM2	small G protein signaling modulator 2 isoform 1	+	2240805	2284348	20.2302	18.5773	4.23368	3.98343
ASHGA5P022089	1.22099	up	noncoding	NR_027499	BCDIN3D-AS1	RefSeq	3109	chr12	+	50222325	50234937	ENST00000551146, NR_027500, NR_027501	AGAACAGAGAAAACTAAGTAGGATGGGGTCGTCCCCCCAGTAATCTGGAAAACAGTTACA	100286844	natural antisense	NM_181708	BCDIN3D	probable methyltransferase BCDIN3D	-	50229825	50236912	1428.68	960.314	10.4595	10.1715
ASHGA5P044742	1.52849	up	noncoding	NR_024473	LOC286135	RefSeq	2842	chr8	+	29779028	29811123		GAAGGAACTGATGATCCGCAGCATCTTGTCATATTCTGAGAACTTATTAAAAGCAAGCAA	286135	intergenic							147.336	91.7555	7.18844	6.57633
ASHGA5P014030	1.49893	up	noncoding	ENST00000398849	LRRC37BP1	GENCODE	1411	chr17	+	28903525	28961341		TACCAGACAACTGAAGAAGCATCTGTAGGGAATCCAGAAGGAGCATTCATGAAGATGTTA		bidirectional	ENST00000436477	AC006050.2		-	28900488	28903499	290.156	173.848	8.18038	7.59645
ASHGA5P057135	1.35828	up	noncoding	TCONS_00013640	XLOC_006301	LincRNAs identified by Cabili et al	475	chr7	+	154795153	154806834	TCONS_00013639, TCONS_00013641	AAACCGGAGTCCAGGAACTCATGGAAGGGCCTCTGCACGGAGATTTGAGCAGCCAGAACT		intergenic							46.9098	35.2074	5.47566	5.03388
ASHGA5P038828	2.01255	up	noncoding	ENST00000513638	GBP1P1	GENCODE	1234	chr1	+	89873237	89890493		TCACACAGCTAGTAAATGTATCAAAGCTGTCTTCATCACTTAGTGGAATCCACAATGATT	400759	intergenic							43.6709	23.3646	5.36942	4.36039
ASHGA5P056679	1.06351	up	noncoding	TCONS_00007196	XLOC_003181	LincRNAs identified by Cabili et al	828	chr3	-	96335998	96337060		TAAAGTATAGGTAGAGGCGACAAACCTATCGAGCCTGGTGATAGCTGGTTGTCCAAGATA		intergenic							305019	282166	18.2688	18.18
ASHGA5P031698	1.43975	up	noncoding	ENST00000569756	AC002519.6	GENCODE	551	chr16	+	31814283	31817242		TTTCACTCCACCCAGACCACTGCATCCATTTTTACCTTAAAATATTTGAAATGGACCACT		intergenic							1627.32	933.648	10.6554	10.1296
ASHGA5P038751	1.27327	up	noncoding	ENST00000431031	SPATA1	GENCODE	1168	chr1	+	84972079	85014531	ENST00000370638, uc001djy.2	AAAGATAAAAAAAGAAACAAAATTCCAATTGATAATTATCCCATTCAGACATTAGTGAAT		intronic antisense	NM_005274	GNG5	guanine nucleotide-binding protein G(I)/G(S)/G(O) subunit gamma-5 precursor	-	84964005	84972262	71.1403	55.0126	6.09619	5.74765
ASHGA5P045355	1.06321	up	noncoding	ENST00000430058	RP11-23B15.1	GENCODE	204	chr9	-	100568216	100572290		ATGTTCCCTGTCTTGGGAGCCTTTCTTCAGGGAGCTTGATGGTTCCAACCCACCCAGGAG		intergenic							329.498	270.771	8.35829	8.26986
ASHGA5P035461	1.26696	up	noncoding	uc021vtc.1	DKFZp451N061	UCSC_knowngene	6735	chr2	-	179607320	179614055		CTGTTATGCACTGCTTTGTTTCTTGCTCAGTGGTTCTGTATAGGTTTTCTTATACAATAA		exon sense-overlapping	NM_133379	TTN	titin isoform novex-3	-	179610046	179672150	368.377	253.636	8.51464	8.17326
ASHGA5P035461	1.26696	up	noncoding	uc021vtc.1	DKFZp451N061	UCSC_knowngene	6735	chr2	-	179607320	179614055		CTGTTATGCACTGCTTTGTTTCTTGCTCAGTGGTTCTGTATAGGTTTTCTTATACAATAA		intron sense-overlapping	NM_001256850	TTN	titin isoform 1	-	179390716	179672150	368.377	253.636	8.51464	8.17326
ASHGA5P035461	1.26696	up	noncoding	uc021vtc.1	DKFZp451N061	UCSC_knowngene	6735	chr2	-	179607320	179614055		CTGTTATGCACTGCTTTGTTTCTTGCTCAGTGGTTCTGTATAGGTTTTCTTATACAATAA		intron sense-overlapping	NM_001267550	TTN	titin isoform IC	-	179390716	179672150	368.377	253.636	8.51464	8.17326
ASHGA5P035461	1.26696	up	noncoding	uc021vtc.1	DKFZp451N061	UCSC_knowngene	6735	chr2	-	179607320	179614055		CTGTTATGCACTGCTTTGTTTCTTGCTCAGTGGTTCTGTATAGGTTTTCTTATACAATAA		intron sense-overlapping	NM_003319	TTN	titin isoform N2-B	-	179390717	179672150	368.377	253.636	8.51464	8.17326
ASHGA5P035461	1.26696	up	noncoding	uc021vtc.1	DKFZp451N061	UCSC_knowngene	6735	chr2	-	179607320	179614055		CTGTTATGCACTGCTTTGTTTCTTGCTCAGTGGTTCTGTATAGGTTTTCTTATACAATAA		intron sense-overlapping	NM_133378	TTN	titin isoform N2-A	-	179390717	179672150	368.377	253.636	8.51464	8.17326
ASHGA5P035461	1.26696	up	noncoding	uc021vtc.1	DKFZp451N061	UCSC_knowngene	6735	chr2	-	179607320	179614055		CTGTTATGCACTGCTTTGTTTCTTGCTCAGTGGTTCTGTATAGGTTTTCTTATACAATAA		intron sense-overlapping	NM_133432	TTN	titin isoform novex-1	-	179390717	179672150	368.377	253.636	8.51464	8.17326
ASHGA5P035461	1.26696	up	noncoding	uc021vtc.1	DKFZp451N061	UCSC_knowngene	6735	chr2	-	179607320	179614055		CTGTTATGCACTGCTTTGTTTCTTGCTCAGTGGTTCTGTATAGGTTTTCTTATACAATAA		intron sense-overlapping	NM_133437	TTN	titin isoform novex-2	-	179390717	179672150	368.377	253.636	8.51464	8.17326
ASHGA5P047683	1.16785	up	noncoding	uc001kyd.1	AK094859	UCSC_knowngene	2743	chr10	+	106061961	106064704		CCCAAGGCCAAGTTTAATACTGTGCATTCTGAAATCTTGCAATGTTGATGATGTAAAATA		intergenic							35.793	31.4489	5.07306	4.84921
ASHGA5P051869	2.30704	up	noncoding	NR_024569	LOC100130872	RefSeq	5001	chr4	-	1189570	1202750		TTTTCTGATATTTGTGCCATTTATTTGGTTTTTCTATTAAGTTTGCCAGAACCTCCGAGA	100130872	exon sense-overlapping	NM_001199021	SPON2	spondin-2 precursor	-	1160720	1202750	19.2066	9.40657	4.16097	2.95492
ASHGA5P052836	3.71353	up	noncoding	uc010keg.2	AJ420595	UCSC_knowngene	1066	chr6	-	117896482	117897548		AATTATATGCTTTTAAAAATTACATAGGAAAGAGAGCTTGAGGCAAACAAAAAAGAAAAA		exon sense-overlapping	NM_001017408	GOPC	Golgi-associated PDZ and coiled-coil motif-containing protein isoform b	-	117881432	117923705	803.793	191.915	9.64397	7.75117
ASHGA5P052836	3.71353	up	noncoding	uc010keg.2	AJ420595	UCSC_knowngene	1066	chr6	-	117896482	117897548		AATTATATGCTTTTAAAAATTACATAGGAAAGAGAGCTTGAGGCAAACAAAAAAGAAAAA		exon sense-overlapping	NM_020399	GOPC	Golgi-associated PDZ and coiled-coil motif-containing protein isoform a	-	117881432	117923705	803.793	191.915	9.64397	7.75117
ASHGA5P029374	1.0097	up	noncoding	ENST00000555524	RP11-982M15.5	GENCODE	716	chr14	-	105156427	105157621		ATAACTTTTCCAACCCAGGAAGTAACTGCACTTTGATGGAAGGCGCAGAGTCTATTTCAG		intronic antisense	NM_001031714	INF2	inverted formin-2 isoform 2	+	105155942	105185947	5.49962	5	2.43948	2.42556
ASHGA5P029374	1.0097	up	noncoding	ENST00000555524	RP11-982M15.5	GENCODE	716	chr14	-	105156427	105157621		ATAACTTTTCCAACCCAGGAAGTAACTGCACTTTGATGGAAGGCGCAGAGTCTATTTCAG		intronic antisense	NM_022489	INF2	inverted formin-2 isoform 1	+	105155942	105185947	5.49962	5	2.43948	2.42556
ASHGA5P029374	1.0097	up	noncoding	ENST00000555524	RP11-982M15.5	GENCODE	716	chr14	-	105156427	105157621		ATAACTTTTCCAACCCAGGAAGTAACTGCACTTTGATGGAAGGCGCAGAGTCTATTTCAG		intronic antisense	NM_032714	INF2	inverted formin-2 isoform 3	+	105155942	105171145	5.49962	5	2.43948	2.42556
ASHGA5P030038	2.75488	up	noncoding	ENST00000558142	RP11-56B16.5	GENCODE	510	chr15	-	52179756	52193320		CACTTTTTCTTCTGTAAAAGTCTGTACAGGTTTCTGTTTGGGGATAAATATTTTCCCTGT		natural antisense	NM_014547	TMOD3	tropomodulin-3	+	52121824	52204331	27.398	11.6133	4.68627	3.22428
ASHGA5P018526	2.04901	up	noncoding	ENST00000454600	RP4-723E3.1	GENCODE	745	chr20	+	50827183	51263280		GTGAAGAGTCATTCTGAGGCATCTCAAGATGAAGGTTTCCTATTTGTGATTATGAAAAAA		intergenic							55.7152	28.8006	5.73768	4.70275
ASHGA5P042961	1.15487	up	noncoding	ENST00000523608	RP1-170O19.17	GENCODE	757	chr7	-	27278861	27280847		TGTTTTCGCTTCTCTTTGGTTAAAAAGTAAGAACAAAGGGAGCTTCCTTCTAAACAATAA		intergenic							26.7783	24.5253	4.65135	4.44362
ASHGA5P014965	1.31338	up	noncoding	uc002dsg.4	RRN3P2	UCSC_knowngene	2265	chr16	+	29086162	29128038		TTCCTCTTATGATTCGGGAACAAAGGCATTCTGCGATGTTGCTCTCCATGGACCATTTTA	653390	intergenic							1390.51	866.403	10.4191	10.0259
ASHGA5P034749	1.2573	up	noncoding	ENST00000424487	RP5-1113E3.3	GENCODE	467	chr1	+	10518611	10519395		TGATGACTCATCACCTTTTCCCTGCAAGGAGTGTACTGTAGATTACCAAACCTGCAGAAG		natural antisense	ENST00000377038	DFFA	DNA fragmentation factor, 45kDa, alpha polypeptide [Source:HGNC Symbol;Acc:2772]	-	10516578	10532583	359.844	249.639	8.47861	8.14828
ASHGA5P027697	1.05746	up	noncoding	NR_024457	LOC100190940	RefSeq	3211	chr12	-	130518356	130526887	ENST00000397340	AGGAGCCTGTTGGGAAGGCAGCGACCCACATCTGTGTGCACCTTTGTGGATTTCAGGTTC	100190940	intergenic							45.6934	43.1557	5.43633	5.35573
ASHGA5P038409	1.54207	up	noncoding	ENST00000507287	RPL32P3	GENCODE	1555	chr3	-	129101764	129115979	NR_003111, uc003emb.3	AGCAACTCCTACCCTATTGTCAAAATCATCCAGCTTTTTCAAAACATCATATTGTACTGA	132241	intergenic							948.773	519.297	9.87958	9.25471
ASHGA5P020165	2.31794	up	noncoding	ENST00000508945	RP11-53O19.1	GENCODE	295	chr5	-	44746098	44808861		GCCCAAGCTTTGAAGAAGTTTACAAAGTCTATATGTCAGAATACACATTTCCCACCTTGC		bidirectional	NM_016640	MRPS30	28S ribosomal protein S30, mitochondrial	+	44809026	44815618	484.923	184.616	8.90315	7.6903
ASHGA5P032690	1.26126	up	noncoding	ENST00000576032	CTD-2561B21.4	GENCODE	494	chr17	-	78914217	78915833		ACAACAGAAAACACCCAGTTAAGCCCAGCGATGAAACAGGGTTGTCTCTTGGTATCAATG		natural antisense	NM_001163034	RPTOR	regulatory-associated protein of mTOR isoform 2	+	78518624	78940173	60.2914	47.923	5.85584	5.52097
ASHGA5P032690	1.26126	up	noncoding	ENST00000576032	CTD-2561B21.4	GENCODE	494	chr17	-	78914217	78915833		ACAACAGAAAACACCCAGTTAAGCCCAGCGATGAAACAGGGTTGTCTCTTGGTATCAATG		natural antisense	NM_020761	RPTOR	regulatory-associated protein of mTOR isoform 1	+	78518624	78940173	60.2914	47.923	5.85584	5.52097
ASHGA5P028575	1.05143	up	noncoding	ENST00000443679	LINC00345	GENCODE	285	chr13	-	53058295	53058815		CATAAACTTATGTTTGCAAAGCACCTTTTACTCTGTGAAATAAAGTGAGTGCAAGCAGTA		intergenic							75.2149	67.7849	6.17527	6.10292
ASHGA5P018536	1.39641	up	noncoding	ENST00000454712	RP11-431J24.2	GENCODE	454	chrX	-	16171342	16183244		GGGAAGAGGAGTTGGATTTGGGAAGCAATGCTAAGCAGTGGAATGGACATCGACATAGAG		natural antisense	NM_005314	GRPR	gastrin-releasing peptide receptor	+	16141423	16171641	8.39478	6.91138	3.05824	2.57651
ASHGA5P018283	1.45664	up	noncoding	ENST00000451572	RP1-66N13.2	GENCODE	551	chr20	-	46987428	46988440		CGCCACACAGAGAGTCTTCCGAGATGGAAATGCTTGCAAGGAAGGAAGAGACACTTTCTA		intergenic							10.3547	7.90761	3.27302	2.73037
ASHGA5P038425	1.04145	up	noncoding	ENST00000513940	RP11-265F19.1	GENCODE	671	chr3	-	130772203	130791179	ENST00000511339	TGATCTCTCATCCCATTGGCCCTTCTAATAGAGCTATTGGCATTCACATCCTATTTTCAG		intronic antisense	NM_001146003	NEK11	serine/threonine-protein kinase Nek11 isoform 3	+	130745693	131069309	718.426	578.793	9.47532	9.41672
ASHGA5P038425	1.04145	up	noncoding	ENST00000513940	RP11-265F19.1	GENCODE	671	chr3	-	130772203	130791179	ENST00000511339	TGATCTCTCATCCCATTGGCCCTTCTAATAGAGCTATTGGCATTCACATCCTATTTTCAG		intronic antisense	NM_024800	NEK11	serine/threonine-protein kinase Nek11 isoform 1	+	130745693	131069309	718.426	578.793	9.47532	9.41672
ASHGA5P038425	1.04145	up	noncoding	ENST00000513940	RP11-265F19.1	GENCODE	671	chr3	-	130772203	130791179	ENST00000511339	TGATCTCTCATCCCATTGGCCCTTCTAATAGAGCTATTGGCATTCACATCCTATTTTCAG		intronic antisense	NM_145910	NEK11	serine/threonine-protein kinase Nek11 isoform 2	+	130745693	130893981	718.426	578.793	9.47532	9.41672
ASHGA5P032774	1.43254	up	noncoding	ENST00000497885	RP11-314A20.2	GENCODE	472	chr17	+	4607524	4608824		CCCCAGTAGCGTGTATACTTTCCTAATATTAGTCTATGCACAAGCACATAAATGAATATT		natural antisense	NM_014389	PELP1	proline-, glutamic acid- and leucine-rich protein 1	-	4574678	4607632	473.974	285.472	8.87249	8.35392
ASHGA5P023846	1.2458	up	noncoding	HMlincRNA716+	HMlincRNA716	LincRNAs identified by Khalil et al	6265	chr19	+	6516276	6522541		AGCACAGAGGTGTGACTCCAGCAAACGTGAGGTGCTAAGAGGGTGACGTTGAGTGCTCCA		intergenic							15.5505	14.1064	3.83957	3.5225
ASHGA5P030245	1.06824	up	noncoding	ENST00000561358	RP11-343B18.2	GENCODE	571	chr15	-	89340643	89341965		GGCTTCTCAACCTTTGTCACATTGGGCTTGATATTTTTAGTTTCTTTCAGTGGTAAATAT		intergenic							175.518	148.297	7.44122	7.34598
ASHGA5P012433	1.75996	up	noncoding	NR_029377	NDUFAF5	RefSeq	2409	chr20	+	13765671	13799067		ACTATCCTGGAATGTTTGAATTGATGGAAGATTTACAAGAACAAAAGTCCAGAATGTTGA	79133	exon sense-overlapping	NM_001039375	NDUFAF5	NADH dehydrogenase [ubiquinone] 1 alpha subcomplex assembly factor 5 isoform 2	+	13765671	13799067	1050.05	504.046	10.0282	9.2127
ASHGA5P012433	1.75996	up	noncoding	NR_029377	NDUFAF5	RefSeq	2409	chr20	+	13765671	13799067		ACTATCCTGGAATGTTTGAATTGATGGAAGATTTACAAGAACAAAAGTCCAGAATGTTGA	79133	exon sense-overlapping	NM_024120	NDUFAF5	NADH dehydrogenase [ubiquinone] 1 alpha subcomplex assembly factor 5 isoform 1	+	13765671	13799067	1050.05	504.046	10.0282	9.2127
ASHGA5P028258	1.29204	up	noncoding	TCONS_00010663	XLOC_004339	LincRNAs identified by Cabili et al	2412	chr5	+	36871456	36876605		TTCAATCCAGCCGACAGTCGTCTTCACCTCCAAAGGTTGCGTTCTTATTCGCAGAAATAA		intergenic							118.021	86.6603	6.85811	6.48846
ASHGA5P042154	1.19178	up	noncoding	ENST00000446887	RP1-111C20.3	GENCODE	331	chr6	-	159485759	159486305		ATCTCACTATCAGTTTAGGAAATTCTCTGGTCTTCATGCTGGCTTCTGACCCTTGTGTCG		intergenic							446.016	321.181	8.78435	8.53123
ASHGA5P022387	2.39771	up	noncoding	ENST00000555924	RP11-1085N6.2	GENCODE	397	chr14	-	57099966	57115376		ACTATTCCTGAAAAAAAATCAAGGCCTGGAAAGGTTCTTTGATGCACAGTTGACAACTAA		natural antisense	NM_017799	C14orf101	UPF0679 protein C14orf101	+	57046510	57116232	43.78	20.1182	5.37303	4.11137
ASHGA5P056167	3.43993	up	noncoding	ENST00000414488	AL132709.5	GENCODE	800	chr14	+	101415314	101424887		GTGTTCTTATGTAAGTCATAGTTGACATTCTTGTTTTTGATTGGGTAGTTTGCCTGTTCA		intergenic							70.854	22.633	6.0908	4.30842
ASHGA5P028113	2.38833	up	noncoding	ENST00000545709	RP11-305O6.3	GENCODE	3457	chr12	+	65675436	65680508		CAGTACATATGTAAGACTTAAGGCATTATTGAAAATAAGCCTGTGCTACATGGTAGAATC		intron sense-overlapping	NM_001031679	MSRB3	methionine-R-sulfoxide reductase B3 isoform 2 precursor	+	65672422	65860687	78.2778	34.1043	6.23846	4.98245
ASHGA5P028113	2.38833	up	noncoding	ENST00000545709	RP11-305O6.3	GENCODE	3457	chr12	+	65675436	65680508		CAGTACATATGTAAGACTTAAGGCATTATTGAAAATAAGCCTGTGCTACATGGTAGAATC		intron sense-overlapping	NM_001193460	MSRB3	methionine-R-sulfoxide reductase B3 isoform 2 precursor	+	65672422	65860687	78.2778	34.1043	6.23846	4.98245
ASHGA5P028113	2.38833	up	noncoding	ENST00000545709	RP11-305O6.3	GENCODE	3457	chr12	+	65675436	65680508		CAGTACATATGTAAGACTTAAGGCATTATTGAAAATAAGCCTGTGCTACATGGTAGAATC		intron sense-overlapping	NM_001193461	MSRB3	methionine-R-sulfoxide reductase B3 isoform 2 precursor	+	65672766	65860687	78.2778	34.1043	6.23846	4.98245
ASHGA5P028113	2.38833	up	noncoding	ENST00000545709	RP11-305O6.3	GENCODE	3457	chr12	+	65675436	65680508		CAGTACATATGTAAGACTTAAGGCATTATTGAAAATAAGCCTGTGCTACATGGTAGAATC		intron sense-overlapping	NM_198080	MSRB3	methionine-R-sulfoxide reductase B3 isoform 1 precursor	+	65672422	65860687	78.2778	34.1043	6.23846	4.98245
ASHGA5P056195	1.22934	up	noncoding	TCONS_00000926	XLOC_000169	LincRNAs identified by Cabili et al	321	chr1	+	46702303	46705490		TGAAAAGAACATCAATTCTTCGGTTGTTGGGTATTCTGTGACACTGACTCCTCTGCCTCC		intergenic							121.672	93.4585	6.9034	6.60552
ASHGA5P033978	1.14016	up	noncoding	NR_027064	PLAC2	RefSeq	3693	chr19	-	5558177	5568005		CAGCTTGGAACTAGATACAGAAATGCTGTTTTGAGAGTGTACTGAATAAAAGATTACATG	257000	intergenic							60.6664	52.7564	5.86459	5.67535
ASHGA5P032176	1.61409	up	noncoding	ENST00000584191	RP11-680C21.2	GENCODE	2851	chr17	-	11196142	11198993		AAATCAACAGGTCCTATAGCCCCTGTAACCTTTTGCTAAAATGTATCCCCAATGCACCGA		intronic antisense	NM_001173461	SHISA6	protein shisa-6 homolog isoform 2 precursor	+	11144739	11467380	577.979	307.616	9.15943	8.46871
ASHGA5P032176	1.61409	up	noncoding	ENST00000584191	RP11-680C21.2	GENCODE	2851	chr17	-	11196142	11198993		AAATCAACAGGTCCTATAGCCCCTGTAACCTTTTGCTAAAATGTATCCCCAATGCACCGA		intronic antisense	NM_001173462	SHISA6	protein shisa-6 homolog isoform 3 precursor	+	11144739	11467380	577.979	307.616	9.15943	8.46871
ASHGA5P032176	1.61409	up	noncoding	ENST00000584191	RP11-680C21.2	GENCODE	2851	chr17	-	11196142	11198993		AAATCAACAGGTCCTATAGCCCCTGTAACCTTTTGCTAAAATGTATCCCCAATGCACCGA		intronic antisense	NM_207386	SHISA6	protein shisa-6 homolog isoform 1 precursor	+	11144739	11467380	577.979	307.616	9.15943	8.46871
ASHGA5P016007	2.25552	up	noncoding	ENST00000425734	RP11-490D19.6	GENCODE	466	chr9	+	104231660	104243784		ATTTGTTTTTTGAGACAGGTATGGCAAGGGGCTGCCAACAAGATCAAGCTGCAGAGGAAA		intronic antisense	NM_032342	TMEM246	transmembrane protein 246	-	104237607	104249475	69.9718	32.4443	6.07287	4.89941
ASHGA5P054314	3.16742	up	noncoding	ENST00000428176	CHRM3-AS2	GENCODE	789	chr1	-	239869621	239870822		CTTACATAGATGTTAACCAAAGTCTGTAAGGTTCGTTCATTTGTCCACAGTTACCCAGAA	100506915	intronic antisense	NM_000740	CHRM3	muscarinic acetylcholine receptor M3	+	239792372	240072717	379.178	112.339	8.55929	6.89599
ASHGA5P044714	1.2675	up	noncoding	ENST00000522570	CTD-2168K21.1	GENCODE	603	chr8	+	24849515	24867292		ATTTCTTCTGTTCCTGGTAGAATTGTGAGATGCTGCATCTGCGTTCCAGCTTTCAAGAAT		intergenic							94.5696	71.3617	6.52192	6.17994
ASHGA5P057497	1.10511	up	noncoding	TCONS_00018340	XLOC_008620	LincRNAs identified by Cabili et al	973	chr10	+	115282516	115291897		AATGTGCTTTGTTTCAGGACCCACAGCAGGAATTTGAACACAGATCAGTTAGACCCCAAG		intergenic							42.2121	38.6213	5.32212	5.17792
ASHGA5P049370	1.00801	up	noncoding	uc010cic.1	FLJ40448	UCSC_knowngene	2184	chr16	+	88809228	88812156		TGTGTCCACTCTGTTCAGTTTTTTGAGCACAAATGGTGTTAGGTGACAGACTCGGGATTG		intronic antisense	NM_001142864	PIEZO1	piezo-type mechanosensitive ion channel component 1	-	88781745	88851372	72.0952	67.7758	6.1143	6.10278
ASHGA5P050029	1.54518	up	noncoding	ENST00000580580	RP11-862L9.3	GENCODE	737	chr18	+	74693271	74696118		TAATGAGAGCCGCTGTCTAAGAGTTAAGGGTTTTCTGGGTGACGTTTAACAATAATAAAG		intronic antisense	NM_001025081	MBP	myelin basic protein isoform 1	-	74690788	74729055	123.792	76.8541	6.92875	6.30097
ASHGA5P050029	1.54518	up	noncoding	ENST00000580580	RP11-862L9.3	GENCODE	737	chr18	+	74693271	74696118		TAATGAGAGCCGCTGTCTAAGAGTTAAGGGTTTTCTGGGTGACGTTTAACAATAATAAAG		intronic antisense	NM_001025090	MBP	myelin basic protein isoform 3	-	74690788	74729055	123.792	76.8541	6.92875	6.30097
ASHGA5P050029	1.54518	up	noncoding	ENST00000580580	RP11-862L9.3	GENCODE	737	chr18	+	74693271	74696118		TAATGAGAGCCGCTGTCTAAGAGTTAAGGGTTTTCTGGGTGACGTTTAACAATAATAAAG		intronic antisense	NM_001025092	MBP	myelin basic protein isoform 4	-	74690788	74729055	123.792	76.8541	6.92875	6.30097
ASHGA5P050029	1.54518	up	noncoding	ENST00000580580	RP11-862L9.3	GENCODE	737	chr18	+	74693271	74696118		TAATGAGAGCCGCTGTCTAAGAGTTAAGGGTTTTCTGGGTGACGTTTAACAATAATAAAG		intronic antisense	NM_001025101	MBP	Golli-MBP isoform 1	-	74690788	74844774	123.792	76.8541	6.92875	6.30097
ASHGA5P050029	1.54518	up	noncoding	ENST00000580580	RP11-862L9.3	GENCODE	737	chr18	+	74693271	74696118		TAATGAGAGCCGCTGTCTAAGAGTTAAGGGTTTTCTGGGTGACGTTTAACAATAATAAAG		intronic antisense	NM_002385	MBP	myelin basic protein isoform 2	-	74690788	74729055	123.792	76.8541	6.92875	6.30097
ASHGA5P041934	2.30625	up	noncoding	ENST00000431043	SNHG5	GENCODE	998	chr6	-	86386845	86388451		CTTTTACATATGTTGTAATGTTTGTAGTCTTGTAAGAATCTCGTGTTTTTCCTTTTCTAG		intergenic							134.294	58.0748	7.047	5.84145
ASHGA5P032234	1.22465	up	noncoding	TCONS_00029538	XLOC_014188	LincRNAs identified by Cabili et al	2332	chr22	+	25957849	25960789		TGCTTAGCCTAAGACACGCAACTTTTTCCAGCTTTTACTCTTCGCTGAATTCTCACGGTG		intergenic							72.3599	57.627	6.11991	5.82754
ASHGA5P035896	2.23757	up	noncoding	TCONS_00026930	XLOC_012991	LincRNAs identified by Cabili et al	281	chr19	+	18315534	18316371		TCAAGAAGAAAATTCGAAGAAAAGGTTTAGCAGGGACAGAGAAGCGACCTGTCCCGGAAA		intergenic							13.1259	5	3.58749	2.42556
ASHGA5P041631	2.31186	up	noncoding	uc003mtr.3	AK024936	UCSC_knowngene	1940	chr6	-	1727166	1729106		CAGGGATGCATTGAATGGTTAATTAGGTTACAAAACTTATTCCCAAATGGAATGTGTTGA		intron sense-overlapping	NM_001253846	GMDS	GDP-mannose 4,6 dehydratase isoform 2	-	1624034	2176225	81.0065	36.159	6.28822	5.07917
ASHGA5P041631	2.31186	up	noncoding	uc003mtr.3	AK024936	UCSC_knowngene	1940	chr6	-	1727166	1729106		CAGGGATGCATTGAATGGTTAATTAGGTTACAAAACTTATTCCCAAATGGAATGTGTTGA		intron sense-overlapping	NM_001500	GMDS	GDP-mannose 4,6 dehydratase isoform 1	-	1624034	2245868	81.0065	36.159	6.28822	5.07917
ASHGA5P034759	1.19952	up	noncoding	ENST00000492121	CTD-2224J9.2	pseudogene	745	chr19	+	53945115	53945860	NM_001043351, NM_001043352, NM_001043353, NM_153649, NR_003148	GATAAACTGAAATGCACCAAAGAGGAACACCTCTGTACACAAAGGATGCTGGACCAGACT									6659.81	4601	12.7018	12.4393
ASHGA5P020335	1.05732	up	noncoding	ENST00000511876	CTC-454M9.1	GENCODE	358	chr5	+	88185267	88201087		AGCTGTAAAGGGCACCACTTTCAGATAAAAACATAGACCTGAATGGCATCATCCAGTATC		natural antisense	NM_001131005	MEF2C	myocyte-specific enhancer factor 2C isoform 2	-	88014057	88199922	42.0791	40.0073	5.31728	5.23687
ASHGA5P020335	1.05732	up	noncoding	ENST00000511876	CTC-454M9.1	GENCODE	358	chr5	+	88185267	88201087		AGCTGTAAAGGGCACCACTTTCAGATAAAAACATAGACCTGAATGGCATCATCCAGTATC		natural antisense	NM_001193347	MEF2C	myocyte-specific enhancer factor 2C isoform 3	-	88014057	88199922	42.0791	40.0073	5.31728	5.23687
ASHGA5P032890	1.24715	up	noncoding	ENST00000583662	RP11-524F11.2	GENCODE	425	chr17	+	17494741	17513799		TAAAATCAATATTGCCGAGGCCTCCGCAGCAGTCAGGCCCTGCCACCGAGCTGTTCGTTA		natural antisense	NM_001267551	PEMT	phosphatidylethanolamine N-methyltransferase isoform 1	-	17408876	17495017	350.438	245.491	8.44201	8.12337
ASHGA5P032890	1.24715	up	noncoding	ENST00000583662	RP11-524F11.2	GENCODE	425	chr17	+	17494741	17513799		TAAAATCAATATTGCCGAGGCCTCCGCAGCAGTCAGGCCCTGCCACCGAGCTGTTCGTTA		natural antisense	NM_001267552	PEMT	phosphatidylethanolamine N-methyltransferase isoform 3	-	17408876	17495017	350.438	245.491	8.44201	8.12337
ASHGA5P032890	1.24715	up	noncoding	ENST00000583662	RP11-524F11.2	GENCODE	425	chr17	+	17494741	17513799		TAAAATCAATATTGCCGAGGCCTCCGCAGCAGTCAGGCCCTGCCACCGAGCTGTTCGTTA		natural antisense	NM_148172	PEMT	phosphatidylethanolamine N-methyltransferase isoform 1	-	17408876	17495017	350.438	245.491	8.44201	8.12337
ASHGA5P019208	1.2241	up	noncoding	ENST00000473164	AC016629.2	GENCODE	944	chr19	+	59086822	59110942		CAGAGACAAGACGGCACCGAAAGCGAAGGAAGCTCCTGCTCCTCCTAAAGCCGAAGCCAA		intergenic							9812.61	6677.19	13.2431	12.9513
ASHGA5P027203	1.05516	up	noncoding	TCONS_00011694	XLOC_005173	LincRNAs identified by Cabili et al	820	chr6	+	11934222	11961218	TCONS_00012426	TTTCAATGACTTGTGCCCTGCCAGCTCTAGCTTTTGAAGGGTCTACACTCATCATCAACA		intergenic							479.294	387.107	8.88746	8.80999
ASHGA5P022111	1.15539	up	noncoding	NR_073022	RPL18	RefSeq	885	chr19	-	49118583	49122675		GTTGGTCAAGGTTTCTGGCCAGAAGAACCAACTCCACATTCAACCAGGTTGTGTTGAAGA	6141	exon sense-overlapping	NM_000979	RPL18	60S ribosomal protein L18 isoform 1	-	49118583	49122675	73699.9	56576	16.1124	15.904
ASHGA5P022111	1.15539	up	noncoding	NR_073022	RPL18	RefSeq	885	chr19	-	49118583	49122675		GTTGGTCAAGGTTTCTGGCCAGAAGAACCAACTCCACATTCAACCAGGTTGTGTTGAAGA	6141	exon sense-overlapping	NM_001270490	RPL18	60S ribosomal protein L18 isoform 2	-	49118583	49122675	73699.9	56576	16.1124	15.904
ASHGA5P022111	1.15539	up	noncoding	NR_073022	RPL18	RefSeq	885	chr19	-	49118583	49122675		GTTGGTCAAGGTTTCTGGCCAGAAGAACCAACTCCACATTCAACCAGGTTGTGTTGAAGA	6141	natural antisense	NM_001204158	SPHK2	sphingosine kinase 2 isoform b	+	49122547	49133663	73699.9	56576	16.1124	15.904
ASHGA5P022111	1.15539	up	noncoding	NR_073022	RPL18	RefSeq	885	chr19	-	49118583	49122675		GTTGGTCAAGGTTTCTGGCCAGAAGAACCAACTCCACATTCAACCAGGTTGTGTTGAAGA	6141	natural antisense	NM_001243876	SPHK2	sphingosine kinase 2 isoform d	+	49122547	49133663	73699.9	56576	16.1124	15.904
ASHGA5P022111	1.15539	up	noncoding	NR_073022	RPL18	RefSeq	885	chr19	-	49118583	49122675		GTTGGTCAAGGTTTCTGGCCAGAAGAACCAACTCCACATTCAACCAGGTTGTGTTGAAGA	6141	natural antisense	NM_020126	SPHK2	sphingosine kinase 2 isoform a	+	49122547	49133663	73699.9	56576	16.1124	15.904
ASHGA5P041308	3.31902	up	noncoding	ENST00000512900	CTC-505O3.2	GENCODE	643	chr5	+	115091340	115091983	TCONS_00010062, TCONS_00010063	AATGAGCATAACTCAATATTTGTGTTTCTAAGAGAAAACCACAGAACCTCCATATCCATG		intergenic							68.9343	22.7775	6.05056	4.3198
ASHGA5P037474	1.23487	up	noncoding	ENST00000428667	AP000695.4	GENCODE	715	chr21	+	37818028	37904706		AAGACTTTCACCCATGCGGTTGGAATGCTAGCCTTAAAATATATACAATTGTTACATGTC		intronic antisense	NM_001146077	CLDN14	claudin-14	-	37832919	37948867	559.38	385.48	9.10896	8.8046
ASHGA5P037474	1.23487	up	noncoding	ENST00000428667	AP000695.4	GENCODE	715	chr21	+	37818028	37904706		AAGACTTTCACCCATGCGGTTGGAATGCTAGCCTTAAAATATATACAATTGTTACATGTC		intronic antisense	NM_001146078	CLDN14	claudin-14	-	37832919	37915117	559.38	385.48	9.10896	8.8046
ASHGA5P037474	1.23487	up	noncoding	ENST00000428667	AP000695.4	GENCODE	715	chr21	+	37818028	37904706		AAGACTTTCACCCATGCGGTTGGAATGCTAGCCTTAAAATATATACAATTGTTACATGTC		intronic antisense	NM_001146079	CLDN14	claudin-14	-	37832919	37852388	559.38	385.48	9.10896	8.8046
ASHGA5P037474	1.23487	up	noncoding	ENST00000428667	AP000695.4	GENCODE	715	chr21	+	37818028	37904706		AAGACTTTCACCCATGCGGTTGGAATGCTAGCCTTAAAATATATACAATTGTTACATGTC		intronic antisense	NM_012130	CLDN14	claudin-14	-	37832919	37838739	559.38	385.48	9.10896	8.8046
ASHGA5P037474	1.23487	up	noncoding	ENST00000428667	AP000695.4	GENCODE	715	chr21	+	37818028	37904706		AAGACTTTCACCCATGCGGTTGGAATGCTAGCCTTAAAATATATACAATTGTTACATGTC		intronic antisense	NM_144492	CLDN14	claudin-14	-	37832919	37852388	559.38	385.48	9.10896	8.8046
ASHGA5P054861	1.52061	up	noncoding	uc001nnn.1	BC028022	UCSC_knowngene	1980	chr11	-	58901711	58910281		GGCAGCTTGAGTCTCGCGCGCGCAGGAAGCGGAGGTGGAAGTTGGGGCGCAGGAATGTGG		natural antisense	ENST00000528737	FAM111A	family with sequence similarity 111, member A [Source:HGNC Symbol;Acc:24725]	+	58910220	58922512	46.1639	31.3992	5.45145	4.8468
ASHGA5P028161	1.57725	up	noncoding	ENST00000552230	RP11-754N21.1	GENCODE	494	chr12	+	78746298	78876799		GTCTGTTCACCCATGAAAGAAGAGGAAGACACCAAATGGATGGCATTGATTTCATTTTAA		intergenic							753.153	407.61	9.55058	8.89317
ASHGA5P022660	2.59292	up	noncoding	ENST00000560461	RP11-66B24.4	GENCODE	688	chr15	-	101455861	101459046		GTTATTGCAGCTATATGGGAACACTTTCAGTTTCCCAAGTTAAAACATGAAATTGCACAT		natural antisense	NM_000693	ALDH1A3	aldehyde dehydrogenase family 1 member A3	+	101420008	101456830	27.3633	12.3913	4.68373	3.30915
ASHGA5P036174	1.03159	up	noncoding	TCONS_00027313	XLOC_013310	LincRNAs identified by Cabili et al	709	chr19	-	35391815	35395580	TCONS_00027736	TATTTTTTATAGCCTGTAGGGTACTGAGCACCATGCACACCTACAGTGATCACAGGCACT		intergenic							25.4923	25.918	4.57803	4.53317
ASHGA5P034966	2.35472	up	noncoding	ENST00000437680	AC020594.5	GENCODE	338	chr2	-	33780113	33788614		TTTTGCTAGGCTATTTTCTGAGTAGTATTTGTCCCGTGGAAAAATACAGAAGAGGAAATG		natural antisense	NM_001139488	RASGRP3	ras guanyl-releasing protein 3 isoform 1	+	33701320	33789798	267.183	107.544	8.05905	6.82349
ASHGA5P034966	2.35472	up	noncoding	ENST00000437680	AC020594.5	GENCODE	338	chr2	-	33780113	33788614		TTTTGCTAGGCTATTTTCTGAGTAGTATTTGTCCCGTGGAAAAATACAGAAGAGGAAATG		natural antisense	NM_015376	RASGRP3	ras guanyl-releasing protein 3 isoform 2	+	33738941	33789798	267.183	107.544	8.05905	6.82349
ASHGA5P034966	2.35472	up	noncoding	ENST00000437680	AC020594.5	GENCODE	338	chr2	-	33780113	33788614		TTTTGCTAGGCTATTTTCTGAGTAGTATTTGTCCCGTGGAAAAATACAGAAGAGGAAATG		natural antisense	NM_170672	RASGRP3	ras guanyl-releasing protein 3 isoform 1	+	33661415	33789798	267.183	107.544	8.05905	6.82349
ASHGA5P037871	1.24747	up	noncoding	ENST00000420391	CTA-796E4.3	GENCODE	188	chr22	+	26557799	26560269		GCTCACTTTGTATTCTGTAAACTTTCAGTTGGAAAATAAACACACTGTCTCCCTGTCAAA		intergenic							165329	129897	17.3018	16.9828
ASHGA5P035722	2.53935	up	noncoding	ENST00000435175	AC106875.1	GENCODE	1170	chr2	+	11821586	11823454		CACTACACATAGGAAACCACCTGGAAACCCAACCACAGTGTCTGATGTGACTTTTCTTAG		intron sense-overlapping	NM_001261428	LPIN1	phosphatidate phosphatase LPIN1 isoform 3	+	11817704	11967533	106.307	43.0963	6.69718	5.35272
ASHGA5P036963	1.1139	up	noncoding	ENST00000435844	LINC00493	GENCODE	502	chr20	+	18548063	18550207	NR_015432	GATAGTTGCCCTGATTCCCATTTTGGGTTTGTGAAAAGTGTATGTATTTAAATTTGCTGT	388789	intergenic							16518	12770.4	14.0023	13.8467
ASHGA5P027176	1.273	up	noncoding	ENST00000541749	RP11-771K4.1	GENCODE	868	chr12	-	31516414	31522235		TTTTGAGAATCAAAGTGAACTGCCAGGGACAAACAAGAGTGGCGAGGAAATGGAAGCAGT		intergenic							61.1856	48.2329	5.87774	5.52951
ASHGA5P050439	1.51691	up	noncoding	ENST00000491596	MYADML	pseudogene	951	chr2	-	33952104	33953055		TGGCAGACGAGAGATGTGAGCTGCAGCGACAGAAACCCCTACCTTGTGTGTATCTGGGAC	151325								103.016	65.564	6.64711	6.04597
ASHGA5P057826	1.07875	up	noncoding	TCONS_00022301	XLOC_010670	LincRNAs identified by Cabili et al	798	chr13	-	80629410	80649189		CCATCAAGAGGACATGGTGAGAAGACAGCCATCTGCAAGCCAGAAAGAGCGCTAACCAGA		intergenic							373.191	299.704	8.53634	8.42698
ASHGA5P046019	1.0097	up	noncoding	ENST00000448486	RP11-738I14.4	GENCODE	624	chr9	+	135321284	135336859		AGTCTTTGGAAATCACACTTCTTATAGATGGAACATGAGAGGAGGAACTGGGCAAAGCGC		intron sense-overlapping	NM_207417	C9orf171	uncharacterized protein C9orf171	+	135285610	135448675	5.49962	5	2.43948	2.42556
ASHGA5P023789	1.04497	up	noncoding	HMlincRNA429-	HMlincRNA429	LincRNAs identified by Khalil et al	27423	chr5	-	73882471	73909894		GGTGCCCACCTTTAAGATTGGCTTATATTTAAAAGCTGATAAATAAGAACTGATCGTTTG		intergenic							122.593	109.305	6.91311	6.84965
ASHGA5P037322	1.86949	up	noncoding	NR_024100	LINC00323	RefSeq	2019	chr21	-	42513426	42519991		AAGTAGGCAGCCAAAAATTTTGGTCTGCTTAATTCTTAGCTCATCTAAGTCTCCAGTTGA	284835	intergenic							246.76	122.363	7.94317	7.04052
ASHGA5P037444	2.22372	up	noncoding	NR_038880	GCFC1-AS1	RefSeq	2946	chr21	+	34100424	34105224		AGTACTAGTCACTCTTGACTGTGGTTTATGTTGTTTCAATAAAGTAGCTTTCCTTCTCAA	100506215	bidirectional	NM_001160302	SYNJ1	synaptojanin-1 isoform c	-	34001068	34100250	18.6559	9.49769	4.11971	2.96674
ASHGA5P037444	2.22372	up	noncoding	NR_038880	GCFC1-AS1	RefSeq	2946	chr21	+	34100424	34105224		AGTACTAGTCACTCTTGACTGTGGTTTATGTTGTTTCAATAAAGTAGCTTTCCTTCTCAA	100506215	bidirectional	NM_001160306	SYNJ1	synaptojanin-1 isoform d	-	34001068	34100250	18.6559	9.49769	4.11971	2.96674
ASHGA5P037444	2.22372	up	noncoding	NR_038880	GCFC1-AS1	RefSeq	2946	chr21	+	34100424	34105224		AGTACTAGTCACTCTTGACTGTGGTTTATGTTGTTTCAATAAAGTAGCTTTCCTTCTCAA	100506215	bidirectional	NM_003895	SYNJ1	synaptojanin-1 isoform a	-	34001068	34100351	18.6559	9.49769	4.11971	2.96674
ASHGA5P037444	2.22372	up	noncoding	NR_038880	GCFC1-AS1	RefSeq	2946	chr21	+	34100424	34105224		AGTACTAGTCACTCTTGACTGTGGTTTATGTTGTTTCAATAAAGTAGCTTTCCTTCTCAA	100506215	bidirectional	NM_203446	SYNJ1	synaptojanin-1 isoform b	-	34001068	34100351	18.6559	9.49769	4.11971	2.96674
ASHGA5P058082	1.2668	up	noncoding	TCONS_00026384	XLOC_012735	LincRNAs identified by Cabili et al	701	chr18	+	77585839	77616415	TCONS_00026385	AGAACTGAGTGAGCAGCTCCTCACGGAAGGTCGAAGCCGCTGGTCTCAGCTGTGTTTTCA		intergenic							36.6507	29.9619	5.10728	4.7661
ASHGA5P045678	1.4901	up	noncoding	ENST00000450864	RP11-311H10.4	GENCODE	353	chr9	+	33402854	33409946		TCTGAGAGGAAGGAGGACACACGAGCCATATTTGCAGAGAAACACCAGCCTGCGAGAGGA		bidirectional	NM_001170	AQP7	aquaporin-7	-	33384947	33402517	59.8134	40.7363	5.84284	5.26743
ASHGA5P018377	2.09731	up	noncoding	uc010gua.3	GUSBP11	UCSC_knowngene	1079	chr22	-	23980674	24051428	ENST00000452737	TTTATCTGTGCATGAACAGGACCTGCTGAAGCTCACACCCGTGGACCACCCAGACTGCCT	91316	intronic antisense	NM_153615	RGL4	ral-GDS-related protein precursor	+	24033047	24041363	317.47	138.58	8.30589	7.23735
ASHGA5P033224	1.28587	up	noncoding	NR_038458	LOC400604	RefSeq	1420	chr17	+	48944039	48945732		TTTATTTGTTTGTTTTTGGTTTTCTGTAATGACAAGTCCATCTGTAATAAAAGTGAGTTA	400604	natural antisense	NM_001243877	TOB1	protein Tob1 isoform 1	-	48939586	48945339	52.1906	40.9921	5.64034	5.27759
ASHGA5P023086	1.28768	up	noncoding	ENST00000569407	CTD-2583P5.3	GENCODE	927	chr16	+	12853138	12855019		CTGGTTCAAGGTAGAAACAATTTTACGTGTCTCAGAAAGAACAAAGAGTTTAAGATGGTG		intronic antisense	NM_001099455	CPPED1	calcineurin-like phosphoesterase domain-containing protein 1 isoform b	-	12753655	12897744	69.08	53.2153	6.05364	5.68886
ASHGA5P023086	1.28768	up	noncoding	ENST00000569407	CTD-2583P5.3	GENCODE	927	chr16	+	12853138	12855019		CTGGTTCAAGGTAGAAACAATTTTACGTGTCTCAGAAAGAACAAAGAGTTTAAGATGGTG		intronic antisense	NM_018340	CPPED1	calcineurin-like phosphoesterase domain-containing protein 1 isoform a	-	12753655	12897744	69.08	53.2153	6.05364	5.68886
ASHGA5P042988	1.12109	up	noncoding	uc011kaj.2	RP9P	UCSC_knowngene	1214	chr7	-	32956426	32982782	ENST00000381639, uc003tdd.3	GGGCGGCGGCGGGAAGGGGCGCCGCACGGAGGAAGTGCCCTCTTGGCCGCAGCCAGAGCC	441212	intronic antisense	ENST00000404479	AVL9	AVL9 homolog (S. cerevisiase) [Source:HGNC Symbol;Acc:28994]	+	32535321	33078516	51.975	46.3918	5.63512	5.47021
ASHGA5P040335	1.16811	up	noncoding	ENST00000503953	CTD-2154B17.1	GENCODE	342	chr5	-	10775169	10777174		CTGGTGTTAGATCAAGTCTGGCCTTTACTATTCCATTAAAAAATGACCATTTGTGATTAG		intergenic							40.5485	35.2353	5.25965	5.03547
ASHGA5P038421	1.01407	up	noncoding	uc003ene.2	FAM86HP	UCSC_knowngene	1886	chr3	-	129816624	129822720	ENST00000427587, ENST00000427893, ENST00000458008, ENST00000459803, ENST00000477247, ENST00000484945, ENST00000506448, ENST00000513466, NM_001083537, NM_001137610	GGGATGTAGCGACGGTCCATCAGCTCTCTGCCTTCCAGCCAGATGTTGTCATTACAGCAG	729375	natural antisense	NM_001136152	ALG1L2	putative glycosyltransferase ALG1L2	+	129800673	129817233	15770.1	13342.8	13.9195	13.8993
ASHGA5P056375	2.81161	up	noncoding	TCONS_00003812	XLOC_001614	LincRNAs identified by Cabili et al	698	chr2	+	107201802	107277026		AAGAGTTCAGAGAAGTCCCAACGTAGAAAGTGGAATTCATGGTGGATTCTTTTGATGGGG		intergenic							439.248	141.737	8.76358	7.27219
ASHGA5P052427	1.35505	up	noncoding	uc003lfn.3	BC030152	UCSC_knowngene	915	chr5	-	139780098	139781013		AATGACTGCTGAAGTGATGACCCGCAAGAATTGGTCAAATTTGGAGTAGACTTCACCCTG		bidirectional	NM_001197030	ANKHD1	ankyrin repeat and KH domain-containing protein 1 isoform 4	+	139781398	139852062	118.845	83.2815	6.86919	6.43085
ASHGA5P052427	1.35505	up	noncoding	uc003lfn.3	BC030152	UCSC_knowngene	915	chr5	-	139780098	139781013		AATGACTGCTGAAGTGATGACCCGCAAGAATTGGTCAAATTTGGAGTAGACTTCACCCTG		bidirectional	NM_017747	ANKHD1	ankyrin repeat and KH domain-containing protein 1 isoform 1	+	139781398	139919441	118.845	83.2815	6.86919	6.43085
ASHGA5P052427	1.35505	up	noncoding	uc003lfn.3	BC030152	UCSC_knowngene	915	chr5	-	139780098	139781013		AATGACTGCTGAAGTGATGACCCGCAAGAATTGGTCAAATTTGGAGTAGACTTCACCCTG		bidirectional	NM_017978	ANKHD1	ankyrin repeat and KH domain-containing protein 1 isoform 2	+	139781398	139852062	118.845	83.2815	6.86919	6.43085
ASHGA5P052427	1.35505	up	noncoding	uc003lfn.3	BC030152	UCSC_knowngene	915	chr5	-	139780098	139781013		AATGACTGCTGAAGTGATGACCCGCAAGAATTGGTCAAATTTGGAGTAGACTTCACCCTG		bidirectional	NM_020690	ANKHD1-EIF4EBP3	ANKHD1-EIF4EBP3 protein	+	139781398	139929163	118.845	83.2815	6.86919	6.43085
ASHGA5P052427	1.35505	up	noncoding	uc003lfn.3	BC030152	UCSC_knowngene	915	chr5	-	139780098	139781013		AATGACTGCTGAAGTGATGACCCGCAAGAATTGGTCAAATTTGGAGTAGACTTCACCCTG		bidirectional	NM_024668	ANKHD1	ankyrin repeat and KH domain-containing protein 1 isoform 3	+	139781398	139852062	118.845	83.2815	6.86919	6.43085
ASHGA5P037654	1.08171	up	noncoding	NR_046312	KIAA1656	RefSeq	7605	chr22	-	30764799	30773894		GTCCTAACCTCCAAGTTTAAAACTACAGTCAGGCATGAATTGTAAGAAAAAGGAGTATTA	85371	natural antisense	NM_001017437	CCDC157	coiled-coil domain-containing protein 157	+	30752626	30772818	51.0035	47.03	5.60529	5.49198
ASHGA5P022177	1.38919	up	noncoding	ENST00000551401	RP11-121G22.3	GENCODE	792	chr12	+	81676462	81706188		CCAGTCATTGGTCAGAGGCAGTGCAGCTTGTGTTACAACTCAAAAGAGTAATACTCTGAA		intronic antisense	NM_001220473	PPFIA2	liprin-alpha-2 isoform b	-	81652044	82152474	152.704	103.41	7.2379	6.76366
ASHGA5P022177	1.38919	up	noncoding	ENST00000551401	RP11-121G22.3	GENCODE	792	chr12	+	81676462	81706188		CCAGTCATTGGTCAGAGGCAGTGCAGCTTGTGTTACAACTCAAAAGAGTAATACTCTGAA		intronic antisense	NM_001220474	PPFIA2	liprin-alpha-2 isoform c	-	81652044	82152474	152.704	103.41	7.2379	6.76366
ASHGA5P022177	1.38919	up	noncoding	ENST00000551401	RP11-121G22.3	GENCODE	792	chr12	+	81676462	81706188		CCAGTCATTGGTCAGAGGCAGTGCAGCTTGTGTTACAACTCAAAAGAGTAATACTCTGAA		intronic antisense	NM_001220475	PPFIA2	liprin-alpha-2 isoform d	-	81652044	82152286	152.704	103.41	7.2379	6.76366
ASHGA5P022177	1.38919	up	noncoding	ENST00000551401	RP11-121G22.3	GENCODE	792	chr12	+	81676462	81706188		CCAGTCATTGGTCAGAGGCAGTGCAGCTTGTGTTACAACTCAAAAGAGTAATACTCTGAA		intronic antisense	NM_001220476	PPFIA2	liprin-alpha-2 isoform e	-	81652044	82152286	152.704	103.41	7.2379	6.76366
ASHGA5P022177	1.38919	up	noncoding	ENST00000551401	RP11-121G22.3	GENCODE	792	chr12	+	81676462	81706188		CCAGTCATTGGTCAGAGGCAGTGCAGCTTGTGTTACAACTCAAAAGAGTAATACTCTGAA		intronic antisense	NM_001220477	PPFIA2	liprin-alpha-2 isoform f	-	81652044	81992150	152.704	103.41	7.2379	6.76366
ASHGA5P022177	1.38919	up	noncoding	ENST00000551401	RP11-121G22.3	GENCODE	792	chr12	+	81676462	81706188		CCAGTCATTGGTCAGAGGCAGTGCAGCTTGTGTTACAACTCAAAAGAGTAATACTCTGAA		intronic antisense	NM_001220478	PPFIA2	liprin-alpha-2 isoform g	-	81652044	81992150	152.704	103.41	7.2379	6.76366
ASHGA5P022177	1.38919	up	noncoding	ENST00000551401	RP11-121G22.3	GENCODE	792	chr12	+	81676462	81706188		CCAGTCATTGGTCAGAGGCAGTGCAGCTTGTGTTACAACTCAAAAGAGTAATACTCTGAA		intronic antisense	NM_001220479	PPFIA2	liprin-alpha-2 isoform h	-	81652044	81763193	152.704	103.41	7.2379	6.76366
ASHGA5P022177	1.38919	up	noncoding	ENST00000551401	RP11-121G22.3	GENCODE	792	chr12	+	81676462	81706188		CCAGTCATTGGTCAGAGGCAGTGCAGCTTGTGTTACAACTCAAAAGAGTAATACTCTGAA		intronic antisense	NM_001220480	PPFIA2	liprin-alpha-2 isoform i	-	81652044	81763193	152.704	103.41	7.2379	6.76366
ASHGA5P022177	1.38919	up	noncoding	ENST00000551401	RP11-121G22.3	GENCODE	792	chr12	+	81676462	81706188		CCAGTCATTGGTCAGAGGCAGTGCAGCTTGTGTTACAACTCAAAAGAGTAATACTCTGAA		intronic antisense	NM_003625	PPFIA2	liprin-alpha-2 isoform a	-	81652044	82153109	152.704	103.41	7.2379	6.76366
ASHGA5P014298	1.05979	up	noncoding	ENST00000404404	RNF216P1	pseudogene	2427	chr7	+	5013618	5037800		GAGATACCAGGCCTTTTCTGATGCCATTAAAAAATGGCAGGAGCTATCACCAGAAACCAG	441191								877.872	694.556	9.77017	9.68639
ASHGA5P030907	1.08808	up	noncoding	ENST00000571963	RP11-473M20.14	GENCODE	1592	chr16	-	3178672	3184883		GGATTTGGGTATTTGGGCTTGAGTGCAGACTGAGCTCCTTGACAATGAGAAATAGGATAT		intronic antisense	ENST00000573771	ZNF213	zinc finger protein 213 [Source:HGNC Symbol;Acc:13005]	+	3179777	3187435	49.4152	45.4206	5.55598	5.4342
ASHGA5P039908	1.03297	up	noncoding	TCONS_00023164	XLOC_011115	LincRNAs identified by Cabili et al	566	chr14	-	97472218	97474117		TTGTTCTCTGGAGTGTAAGTGACAACAGCTGTAGCTATCTGCTCAGTGTCTTTCCACATG		intergenic							297.251	253.255	8.21722	8.17043
ASHGA5P049701	1.22938	up	noncoding	NR_027295	MGC57346	RefSeq	2608	chr17	+	43697980	43715329	NR_026680	TCTTTGTGCCTTGTGGCCACATCAGCTAGCCTCTGCTGTGTGCACGTGTACGTGTGTGCT	401884	exon sense-overlapping	NM_001256299	CRHR1	corticotropin-releasing factor receptor 1 isoform 5	+	43697709	43913194	169.417	126.136	7.3887	7.09077
ASHGA5P044467	3.6925	up	noncoding	ENST00000520433	RP11-152P17.2	GENCODE	748	chr8	-	106792473	107072752		CACCTGAAATCACAGAAAATTTATTTGTCCTCAATGCAAAGATGAACTATGAAGAGCACT		intronic antisense	NM_012082	ZFPM2	zinc finger protein ZFPM2	+	106331146	106816767	104.952	30.4432	6.67639	4.79179
ASHGA5P022480	1.02878	up	noncoding	ENST00000557784	CTD-2007A10.1	GENCODE	555	chr14	-	88100722	88121638		TAACATGGGCCCTGCCAGCTGCTGCTGCCCCCGAGACAGTAAGACCGACTCCTCCTCTTT		intergenic							11321.5	9299.94	13.4562	13.4153
ASHGA5P053720	1.20064	up	noncoding	ENST00000535188	RP11-195E11.3	GENCODE	1811	chr9	-	72784558	72787804		ATCTTTCCAGAGATAGCTTCACACATAAGGAACCACCTTAGCATCCTTCACTCAATGCTG		natural antisense	NM_153267	MAMDC2	MAM domain-containing protein 2 precursor	+	72658496	72841888	110.229	86.8526	6.75477	6.49096
ASHGA5P022761	1.31707	up	noncoding	ENST00000562306	RP11-299H22.3	pseudogene	2579	chr15	-	62534949	62545434		TTACAGGTGAAGTCTTGATGTTTGAGAAAGCAGAATTGAAGACAACACTGTATCACAATG									28.6375	23.2037	4.74609	4.34876
ASHGA5P028426	1.03125	up	noncoding	ENST00000434601	LINC00422	GENCODE	1179	chr13	-	21877650	21922860		GCCTACAGCCTAAATTTTCAAAAACAAGTTAATGCCAGAATATAAACTCCGTGAAGTAAC	100505610	intergenic							50.3465	48.5166	5.58498	5.54059
ASHGA5P050675	1.21777	up	noncoding	ENST00000427278	ZEB2-AS1	GENCODE	1215	chr2	+	145275981	145278683		TCTCTGCCCTTTCTCTTATTGTTATTTTTTTCTTTTTAGGTACCAGAGCCAGAAAAAAAA	100303491	natural antisense	NM_001171653	ZEB2	zinc finger E-box-binding homeobox 2 isoform 2	-	145141941	145277958	6967.84	4739.13	12.7659	12.4817
ASHGA5P050675	1.21777	up	noncoding	ENST00000427278	ZEB2-AS1	GENCODE	1215	chr2	+	145275981	145278683		TCTCTGCCCTTTCTCTTATTGTTATTTTTTTCTTTTTAGGTACCAGAGCCAGAAAAAAAA	100303491	natural antisense	NM_014795	ZEB2	zinc finger E-box-binding homeobox 2 isoform 1	-	145141941	145277958	6967.84	4739.13	12.7659	12.4817
ASHGA5P051453	1.07453	up	noncoding	ENST00000366441	AC093415.2	GENCODE	895	chr3	-	37859767	37903256		GCAAGAAAAACATCCTGTGGAGACATTTTTCAAAATGCATGGACTTCCTGCGGGTGATAT		natural antisense	NM_002207	ITGA9	integrin alpha-9 precursor	+	37493812	37861281	132.496	114	7.02727	6.92356
ASHGA5P026720	2.63068	up	noncoding	ENST00000563681	RP11-660M18.2	GENCODE	466	chr11	+	90224886	90585825	ENST00000561596, ENST00000562245, ENST00000562678, uc021qoq.1	GATCCAGACAGAAAAAGAGAACAGCAAATATTTGAAAGAGCTTAAGACGTACTCCTCAAG		intergenic							209.548	77.3756	7.709	6.31357
ASHGA5P019739	2.84594	up	noncoding	ENST00000502287	RP11-252I13.2	GENCODE	794	chr5	-	107035657	107052542		TCAGCCTCCATAATCATAGGTTTTCCTCAAATGTGTGATGACCTTAGCTGACCATTTTTT		intergenic							60.4203	23.2228	5.85971	4.3508
ASHGA5P009342	1.00966	up	noncoding	ENST00000354527	RP11-57C13.3	GENCODE	744	chr10	-	89369919	89419760		CGGGAAGGAGATGCTCGTGTCAAAGAGAAGAGCTACAAGACTGTTTCTGCCCCCAAGGTG		natural antisense	NM_001015880	PAPSS2	bifunctional 3'-phosphoadenosine 5'-phosphosulfate synthase 2 isoform b	+	89419475	89507462	215.16	189.512	7.74545	7.73158
ASHGA5P009342	1.00966	up	noncoding	ENST00000354527	RP11-57C13.3	GENCODE	744	chr10	-	89369919	89419760		CGGGAAGGAGATGCTCGTGTCAAAGAGAAGAGCTACAAGACTGTTTCTGCCCCCAAGGTG		natural antisense	NM_004670	PAPSS2	bifunctional 3'-phosphoadenosine 5'-phosphosulfate synthase 2 isoform a	+	89419475	89507462	215.16	189.512	7.74545	7.73158
ASHGA5P019778	1.02119	up	noncoding	ENST00000503066	RP11-291L15.2	GENCODE	897	chr4	-	145564375	145567064		GTTTGGGCGGAGGGAAAATTGCAACCCTTGCCTACAACCAGACTGACAGCATAATTTCTT		bidirectional	NM_022475	HHIP	hedgehog-interacting protein precursor	+	145567147	145659881	200.787	175.398	7.64094	7.61069
ASHGA5P019664	1.3244	up	noncoding	ENST00000499180	RP11-453E17.1	GENCODE	409	chr4	+	68928779	68945944		ATAACTTAAGGAAAGCTTCCTGCTGACTCAAAAGGATTTTTCTTCTTCTGAACTCCTATT		intronic antisense	NM_207407	TMPRSS11F	transmembrane protease serine 11F	-	68918915	68995587	17.9356	15.2473	4.05986	3.65452
ASHGA5P022180	1.44769	up	noncoding	ENST00000551438	RP11-588H23.3	GENCODE	596	chr12	+	70861974	70931985		CTTCTAGTCATTTAATTATTGCTTGACCAGAACTGTGCCTTGTAAGGAAGATAGTGAAAA		natural antisense	NM_001109754	PTPRB	receptor-type tyrosine-protein phosphatase beta isoform a	-	70910631	71031220	28.0604	20.9692	4.71988	4.18613
ASHGA5P022180	1.44769	up	noncoding	ENST00000551438	RP11-588H23.3	GENCODE	596	chr12	+	70861974	70931985		CTTCTAGTCATTTAATTATTGCTTGACCAGAACTGTGCCTTGTAAGGAAGATAGTGAAAA		natural antisense	NM_001206971	PTPRB	receptor-type tyrosine-protein phosphatase beta isoform c precursor	-	70910631	71003624	28.0604	20.9692	4.71988	4.18613
ASHGA5P022180	1.44769	up	noncoding	ENST00000551438	RP11-588H23.3	GENCODE	596	chr12	+	70861974	70931985		CTTCTAGTCATTTAATTATTGCTTGACCAGAACTGTGCCTTGTAAGGAAGATAGTGAAAA		natural antisense	NM_001206972	PTPRB	receptor-type tyrosine-protein phosphatase beta isoform d precursor	-	70910631	71003624	28.0604	20.9692	4.71988	4.18613
ASHGA5P022180	1.44769	up	noncoding	ENST00000551438	RP11-588H23.3	GENCODE	596	chr12	+	70861974	70931985		CTTCTAGTCATTTAATTATTGCTTGACCAGAACTGTGCCTTGTAAGGAAGATAGTGAAAA		natural antisense	NM_002837	PTPRB	receptor-type tyrosine-protein phosphatase beta isoform b precursor	-	70910631	71003624	28.0604	20.9692	4.71988	4.18613
ASHGA5P042233	1.23501	up	noncoding	ENST00000454882	RP3-380B8.4	GENCODE	412	chr6	+	5851738	5870453		GCCCACACATAAGCTGAAGTATTGCCTTATGACATATTCTGAATATTCCAATTATTTTGC		intergenic							26.2376	22.7421	4.62151	4.31699
ASHGA5P034854	1.83592	up	noncoding	ENST00000425763	AC107057.1	GENCODE	319	chr2	-	5689911	5696163		GAATGCATTTGGAGTAGGTGATGTTTAATGATCCTTTCTGTTCTCAATTCCTGTAATACA		intergenic							361.034	175.026	8.48393	7.60743
ASHGA5P046984	1.22628	up	noncoding	ENST00000366446	RP11-322M19.1	GENCODE	819	chr10	-	89093796	89096586		GTGTCAGAGAAAGAGTTAGTTTGGGGAAATATCCTCTCCACCACAATCTTAGTCATTGAA		intergenic							2306.44	1548.36	11.1642	10.8699
ASHGA5P017359	1.24705	up	noncoding	ENST00000440573	RP1-238O23.4	GENCODE	449	chr6	-	41107593	41108570		CCACTCTGTCAAATCTCTGTATTCCTAAGTTTCTTTTCTAAGAGTTATTTTCCTGCAGAA		intergenic							25.128	21.5755	4.55496	4.23644
ASHGA5P036562	1.62345	up	noncoding	TCONS_00025984	XLOC_012324	LincRNAs identified by Cabili et al	247	chr17	+	76357880	76360723	TCONS_00025512	TCTGAAGACAAAGGAATGAAGACGAAAACGTTTCTGAAAATGTGGGTGGAGACACCTGGG		intergenic							116.323	69.2787	6.83626	6.1372
ASHGA5P026827	1.09477	up	noncoding	TCONS_00011825	XLOC_005311	LincRNAs identified by Cabili et al	283	chr6	+	47824776	47838098		ATGGGAAATGGTGTTGGATCAGCAGAAAACTGGAAATCTTATTTGTTTCCCTCCAGACTA		intergenic							331.281	265.122	8.36532	8.23469
ASHGA5P048962	1.26833	up	noncoding	ENST00000567091	LA16c-313D11.9	GENCODE	730	chr16	-	728503	729777		AGGAGGCTGGCCACTACGGGAGCTCAATAAACACTTCCCAAACTCACGCCTGATCACACA		intronic antisense	ENST00000445361	MSLN	mesothelin [Source:HGNC Symbol;Acc:7371]	+	693261	818865	110.512	82.5878	6.7597	6.41678
ASHGA5P048962	1.26833	up	noncoding	ENST00000567091	LA16c-313D11.9	GENCODE	730	chr16	-	728503	729777		AGGAGGCTGGCCACTACGGGAGCTCAATAAACACTTCCCAAACTCACGCCTGATCACACA		intronic antisense	ENST00000446427	MSLN	mesothelin [Source:HGNC Symbol;Acc:7371]	+	693261	818865	110.512	82.5878	6.7597	6.41678
ASHGA5P026642	1.06643	up	noncoding	ENST00000529215	CTD-2562J17.7	GENCODE	506	chr11	+	74971170	74972069		TGTGTAAAGATGAATTTAACCCTAGCCTCTCTCCTATCACACTGCTTCTCCTGCTGTGTC		natural antisense	NM_004041	ARRB1	beta-arrestin-1 isoform A	-	74971165	75062875	59521.3	49718.8	15.8049	15.7121
ASHGA5P026642	1.06643	up	noncoding	ENST00000529215	CTD-2562J17.7	GENCODE	506	chr11	+	74971170	74972069		TGTGTAAAGATGAATTTAACCCTAGCCTCTCTCCTATCACACTGCTTCTCCTGCTGTGTC		natural antisense	NM_020251	ARRB1	beta-arrestin-1 isoform B	-	74971165	75062875	59521.3	49718.8	15.8049	15.7121
ASHGA5P057765	1.2654	up	noncoding	TCONS_00021856	XLOC_010451	LincRNAs identified by Cabili et al	757	chr13	+	80585258	80733471		ATTAAAGAAGACATGGGAGTATTCCGTATACACTGGACTGGCATTCTAGCTCATCCTGGG		intergenic							99.0677	74.4873	6.58913	6.24954
ASHGA5P014894	1.17275	up	noncoding	uc003tvr.4	PMS2P4	UCSC_knowngene	569	chr7	-	66757422	66767406	ENST00000414507, NM_000535, NR_003613, NR_003614, NR_027775, NR_027776, NR_027777, NR_046297, NR_046299, uc003tvo.2, uc003tvs.4, uc003txh.4, uc003ucq.3, uc003uui.2, uc010lgv.1, uc011kfq.2	AGAGCTAGAGTACAGAACCTGCTAAGGCCATCAAACCTATCGATCGGAAGTCAGTCCATC	5382	intergenic							608.311	438.774	9.23324	9.00335
ASHGA5P048385	1.14069	up	noncoding	CD172306		LincRNAs identified by Khalil et al	818	chr4	-	123055004	123055682		TAAAGAGAAAGAACTTTGCAAGTCTGCCTGAAGGGACTCACATCCATGCCTAAGGATGCT		intergenic							28.2067	25.9473	4.72476	4.53486
ASHGA5P052151	1.02311	up	noncoding	TCONS_00015168	XLOC_007214	LincRNAs identified by Cabili et al	1349	chr8	-	128153590	128197980		TCAGCCTCCCTGGACTGTTACATAATGATACATAAAAATATTTCTTGTGTTGAGGCATCC		intergenic							290.721	250.122	8.18377	8.15081
ASHGA5P038090	1.0097	up	noncoding	ENST00000441861	AC087859.1	GENCODE	2683	chr3	-	7994491	8057994		ACAGAATCATTTTTAGAATCTTAATTCTGAGATTCACTGTTGGGCTTAAGTCACTGCTTC		intergenic							5.49962	5	2.43948	2.42556
ASHGA5P036233	1.01985	up	noncoding	TCONS_00016358	XLOC_007738	LincRNAs identified by Cabili et al	416	chr9	-	76738435	76753959		ACATTTATATGTGTATCAATATTCTCAAGCAGGAACACAGCACTGCCCTTCCAGCTCCCT		intergenic							980.3	800.287	9.9281	9.89974
ASHGA5P056763	1.14061	up	noncoding	TCONS_00008500	XLOC_003973	LincRNAs identified by Cabili et al	231	chr4	-	69601915	69616639		CCAGATGAGCAAGAAACCTTGGGACAAGTCTACTGGCAGCTAATATAAGCACATACCAAG		intergenic							8.28007	8.71572	3.04443	2.85462
ASHGA5P044396	1.09403	up	noncoding	ENST00000521148	RP11-100L22.2	GENCODE	496	chr8	-	93711977	93777806	ENST00000521230	GGGTGAAGAGCCCCCAATTATTTATAAAGTGTTTGCTGCCTCATTTATGAAAATAAATAG		intergenic							379.271	300.336	8.55957	8.42991
ASHGA5P048286	1.50064	up	noncoding	TCONS_00014341	XLOC_006505	LincRNAs identified by Cabili et al	698	chr7	-	77144083	77150605		GTTTTTATCTTGGGGAAATTCTCCTCATTTTTGGCCATGATACTTTGTACTTGAATCTTC		intergenic							15.8467	12.1773	3.87003	3.28445
ASHGA5P020876	1.07323	up	noncoding	ENST00000521252	RP11-363L24.3	GENCODE	296	chr8	-	31024593	31034388		GGGGTTTAACAACTTGAACAGATCTCTTCAGAACCGGGAAAACATCTCCTTTTGTTGACA		natural antisense	NM_000553	WRN	Werner syndrome ATP-dependent helicase	+	30890777	31031277	35.3187	33.4584	5.05325	4.95129
ASHGA5P015612	1.03656	up	noncoding	ENST00000421927	MCM3AP-AS1	GENCODE	2280	chr21	+	47649160	47662913		GAGTGCGAAGCAGACTGCTCGACAAACACTGCGCCAAGAGCTCCTCAGCAGAAGCTCCTC	114044	natural antisense	NM_003906	MCM3AP	80 kDa MCM3-associated protein	-	47655047	47705236	226.988	194.396	7.82166	7.76986
ASHGA5P058872	1.09359	up	noncoding	uc.394+	uc.394	UCR	202	chr15	+	97236099	97236301		TGGACACTAATACCCATTCATTTTCTTGGCTCCATAAATAAAAGCCGCCAGCTCTGTGGC		intergenic							55.5259	50.5855	5.7321	5.60303
ASHGA5P042977	1.27377	up	noncoding	ENST00000580902	AC005154.6	GENCODE	926	chr7	-	30563590	30603614	ENST00000426529, ENST00000434399, ENST00000440438, ENST00000577889, ENST00000578293, ENST00000578572, ENST00000582838, NR_038889, uc003tbd.3, uc003tbe.2	AGAACCAAATGACAGCAATAGCCAAGTGTAATCATCAGTAACCCTGTGTTCTATCCACAG		intergenic							669.299	442.869	9.36778	9.01868
ASHGA5P051223	2.73892	up	noncoding	uc001ebj.2	LOC100129269	UCSC_knowngene	1620	chr1	-	112141628	112150940		CCTGCTGAAGTGCCGATTTCAAATGAAGACTGACTTGATCCTGAACATAACCTACAAGAA	100129269	intronic antisense	ENST00000356415	RAP1A	RAP1A, member of RAS oncogene family [Source:HGNC Symbol;Acc:9855]	+	112084839	112255735	36.9631	15.3503	5.11995	3.66634
ASHGA5P019768	1.47653	up	noncoding	ENST00000502790	RP11-692D12.1	GENCODE	685	chr4	+	74124925	74183670		ATTTGCCAAGACATTTTGGAGTTTCTGAAATAAAACCCACTTGATCCCTTCTATGTTCAT		bidirectional	NM_032217	ANKRD17	ankyrin repeat domain-containing protein 17 isoform a	-	73940501	74124502	214.909	133.814	7.74295	7.18074
ASHGA5P019768	1.47653	up	noncoding	ENST00000502790	RP11-692D12.1	GENCODE	685	chr4	+	74124925	74183670		ATTTGCCAAGACATTTTGGAGTTTCTGAAATAAAACCCACTTGATCCCTTCTATGTTCAT		bidirectional	NM_198889	ANKRD17	ankyrin repeat domain-containing protein 17 isoform b	-	73940501	74124502	214.909	133.814	7.74295	7.18074
ASHGA5P029373	1.52151	up	noncoding	ENST00000564585	RP11-982M15.8	GENCODE	3816	chr14	-	105127456	105131895		GACAGGAAAACGTAATGTTATAAACACATAATTCTCCCCAGAGAATTATGGGGACATAAT		intergenic							121.051	76.3395	6.89652	6.29102
ASHGA5P020274	1.67993	up	noncoding	ENST00000510718	IMPA1P	pseudogene	842	chr8	-	82517803	82539184		TTAAACATTTTAAGATTTCCTTTTGTAGCTGTTTCGATTGGCCTTGTTGTAAATAAGAAG									188.239	105.824	7.54726	6.79886
ASHGA5P035629	1.80363	up	noncoding	ENST00000416509	AC107079.1	GENCODE	669	chr2	-	238031552	238032740		CAGTAACACTTCCTTTTTGTTGATTCTTGATCTGGGATGTAAACATTTCTTCTTTCAGTG		intergenic							78.1544	43.9564	6.23602	5.38512
ASHGA5P035512	2.02555	up	noncoding	NR_037886	LOC100507140	RefSeq	2050	chr2	-	201577027	201599900		TGCATTTTTGCTTCTAATGAGACCTGACTTTCTGGCCTATTTCAGGACTTTACATTGTTC	100507140	intergenic							112.883	55.8508	6.79302	5.77471
ASHGA5P056266	2.88231	up	noncoding	TCONS_00001551	XLOC_000894	LincRNAs identified by Cabili et al	301	chr1	-	84937580	84943596		ACAAATCTGAGAGGAGACCCTAAACTTGGCCATGATGGTAAAGGATGCAAGGACAATCCT		intergenic							16.7636	5	3.95278	2.42556
ASHGA5P050507	1.48186	up	noncoding	ENST00000429599	PCBP1-AS1	GENCODE	717	chr2	-	70310638	70313405	ENST00000437019, ENST00000442040, ENST00000456161	GCGAATGACTGTAAAATGTGGGCACAATATTTAATCTCTCGCCTTTTTAAAGCTTAATAG	400960	intergenic							21.6305	16.3591	4.33686	3.76945
ASHGA5P032487	1.45485	up	noncoding	uc002ilk.1	AX748120	UCSC_knowngene	934	chr17	-	45400563	45401497		CTCATTCTTCCAGGGTTGTGGGAATTCAAAAATATATACGTAGTGCTCAATAAATGTTAC		natural antisense	NM_001195192	EFCAB13	EF-hand domain-containing protein C17orf57 isoform B	+	45401326	45508076	526.672	310.805	9.02291	8.48204
ASHGA5P032487	1.45485	up	noncoding	uc002ilk.1	AX748120	UCSC_knowngene	934	chr17	-	45400563	45401497		CTCATTCTTCCAGGGTTGTGGGAATTCAAAAATATATACGTAGTGCTCAATAAATGTTAC		natural antisense	NM_152347	EFCAB13	EF-hand domain-containing protein C17orf57 isoform A	+	45401326	45518677	526.672	310.805	9.02291	8.48204
ASHGA5P058353	1.84761	up	noncoding	uc001pen.1	AF086184	UCSC_knowngene	707	chr11	-	93800139	93862566		AGAAATGTTGAGAAAACACTCAATAAAAGTGAAGATCAGCATACACTGAGAACAGCCTCG		natural antisense	NM_001098672	HEPHL1	hephaestin-like protein 1 precursor	+	93754377	93847374	105.236	56.5874	6.68111	5.79545
ASHGA5P058353	1.84761	up	noncoding	uc001pen.1	AF086184	UCSC_knowngene	707	chr11	-	93800139	93862566		AGAAATGTTGAGAAAACACTCAATAAAAGTGAAGATCAGCATACACTGAGAACAGCCTCG		natural antisense	NM_015368	PANX1	pannexin-1	+	93862093	93915137	105.236	56.5874	6.68111	5.79545
ASHGA5P058665	1.32122	up	noncoding	uc.110-	uc.110	UCR	243	chr2	-	237071381	237071624		CCAAGGTTGGGTTTTGACATCACTATATTTGTTGTTACAATAAATTCCACTTACATCTGC		intergenic							183.938	127.903	7.51143	7.10956
ASHGA5P019668	1.37277	up	noncoding	uc003yrb.3	CR933665	UCSC_knowngene	5641	chr8	-	125474737	125486804		CATCTTTGAGAGAAGCCAGTATTTGGAGATGTTTACCCTGCTGTTTTGGAAGTTGTCCAC		bidirectional	NM_007218	RNF139	E3 ubiquitin-protein ligase RNF139	+	125487007	125500859	66.6987	48.6673	6.00207	5.54498
ASHGA5P021152	2.10557	up	noncoding	ENST00000526488	TSSC2	GENCODE	674	chr11	+	3404691	3418469		GAAGAGAAAACAAATATATTGTGACTATATATATATAGTCACAGGTGCCCAGGCCGGAGT		intergenic							18.0681	9.69166	4.07128	2.99707
ASHGA5P057245	1.10942	up	noncoding	TCONS_00014917	XLOC_006983	LincRNAs identified by Cabili et al	233	chr8	-	5858958	5860627	TCONS_00014916	TCTCCAGTTTTGACATCCTAGCCCCAGCAGATGATGCACCTAAAGTTGAAAAGCTGACTT		intergenic							113.878	96.2735	6.80497	6.65517
ASHGA5P039631	1.03006	up	noncoding	ENST00000507486	RP11-284M14.1	GENCODE	759	chr4	-	144098812	144105982	ENST00000507826	TGAAAACTCGAATAAGTGCTATCGATGTGAAATCCGAGGAAAAGAGCATTTGGGGGAAAA		bidirectional	NM_032557	USP38	ubiquitin carboxyl-terminal hydrolase 38	+	144106069	144143141	39.3547	38.4249	5.21291	5.17018
ASHGA5P023559	1.36105	up	noncoding	ENST00000584047	AC145343.2	GENCODE	432	chr17	-	66092242	66097610		AAGGGAGCAGGTTTATTTAACAATGTGAAGTAGTCCTGGGAAGTTGTACTTTGAGCAAGG		intergenic							23.5261	19.0497	4.46711	4.02239
ASHGA5P040406	1.08209	up	noncoding	ENST00000508986	EGFLAM-AS1	GENCODE	331	chr5	-	38425137	38427478		TACTATTTGCCTTTTTAAGGGAAAGAGTCCCAGAAGTTTTCAGCCCTCACCTGAGGACAC		natural antisense	NM_001205301	EGFLAM	pikachurin isoform 5 precursor	+	38258510	38465582	410.215	326.42	8.66721	8.55339
ASHGA5P040406	1.08209	up	noncoding	ENST00000508986	EGFLAM-AS1	GENCODE	331	chr5	-	38425137	38427478		TACTATTTGCCTTTTTAAGGGAAAGAGTCCCAGAAGTTTTCAGCCCTCACCTGAGGACAC		natural antisense	NM_152403	EGFLAM	pikachurin isoform 1 precursor	+	38258510	38465582	410.215	326.42	8.66721	8.55339
ASHGA5P040406	1.08209	up	noncoding	ENST00000508986	EGFLAM-AS1	GENCODE	331	chr5	-	38425137	38427478		TACTATTTGCCTTTTTAAGGGAAAGAGTCCCAGAAGTTTTCAGCCCTCACCTGAGGACAC		natural antisense	NM_182798	EGFLAM	pikachurin isoform 2	+	38403633	38465582	410.215	326.42	8.66721	8.55339
ASHGA5P023618	1.19953	up	noncoding	HMlincRNA1090+	HMlincRNA1090	LincRNAs identified by Khalil et al	1958	chr9	+	33081447	33083405		AAGGAAGTAAGATTTTCCCCCGGGTATTGTTTTTCTTGTTGACTCTGGTCACTGTGGTGC		intergenic							69.7366	56.8835	6.06719	5.80472
ASHGA5P032879	1.11837	up	noncoding	NR_027167	C17orf76-AS1	RefSeq	1015	chr17	+	16342300	16345340	ENST00000460249, ENST00000472367, ENST00000478103, ENST00000480811, ENST00000483140, ENST00000484836, ENST00000497774, ENST00000578757, NR_027160, NR_027161, NR_027162, NR_027163, NR_027164, NR_027168, NR_027169, NR_045026	TTAGTTGACCGTAACTGCCAGAGCCCTGCCCTGAATTCCTGTCCTTACTCCCTCTTTAAG	125144	natural antisense	NM_001113567	FAM211A	leucine-rich repeat-containing protein FAM211A isoform 1	-	16345318	16395505	33434.2	25970.4	14.9888	14.8274
ASHGA5P032879	1.11837	up	noncoding	NR_027167	C17orf76-AS1	RefSeq	1015	chr17	+	16342300	16345340	ENST00000460249, ENST00000472367, ENST00000478103, ENST00000480811, ENST00000483140, ENST00000484836, ENST00000497774, ENST00000578757, NR_027160, NR_027161, NR_027162, NR_027163, NR_027164, NR_027168, NR_027169, NR_045026	TTAGTTGACCGTAACTGCCAGAGCCCTGCCCTGAATTCCTGTCCTTACTCCCTCTTTAAG	125144	natural antisense	NM_207387	FAM211A	leucine-rich repeat-containing protein FAM211A isoform 2	-	16345318	16395505	33434.2	25970.4	14.9888	14.8274
ASHGA5P049522	1.42296	up	noncoding	ENST00000460249	C17orf76-AS1	GENCODE	773	chr17	+	16342640	16344880	ENST00000492250	TTTTCTGAAGATATCTCTTACCCTGTGATTGACTGTCAGTTGGTGCAGAAAGTGAGATTG	125144	intergenic							106.166	71.5666	6.69397	6.18508
ASHGA5P050125	1.13156	up	noncoding	ENST00000552685	AC004790.2	GENCODE	577	chr19	+	16133467	16135989	ENST00000379899, uc002nca.3, uc002ncb.1	TTTTGCCCTCGAAGCTCGCTGAAGGGGACCCATCTCTGCAAGCCCACAGCCCTACCTGCA		intron sense-overlapping	ENST00000397365	AC004790.1		+	16124066	16152945	756.785	564.402	9.55766	9.37934
ASHGA5P018466	1.10284	up	noncoding	ENST00000453880	AC107070.1	GENCODE	812	chr2	-	4007851	4021617		CCAGGATGGATGCTGGCCTGCCCTCAACCACAACATTGAACCCAACATCCCCCTAAGTAG		intergenic							2005.04	1493.87	10.9594	10.8182
ASHGA5P020511	4.29244	up	noncoding	ENST00000514992	AC005562.2	pseudogene	481	chr17	+	28927882	28942998	ENST00000579301	CCAGGCGCATGAAATCTTTAACATGTATATTGAAAAGTCTGATTCAGTTACAATCAGTGT									24.8078	5.1627	4.5365	2.4347
ASHGA5P022469	2.12228	up	noncoding	NR_039992	LINC00645	RefSeq	3555	chr14	+	28081793	28108842		AATGTAAACAGAGGTGGTGCCTTGACATTATTGGTTCACCAACAGAGCAGAACTGCCTCA	100505967	intergenic							42.7022	21.8075	5.3379	4.25229
ASHGA5P045076	1.73965	up	noncoding	NR_015445	BREA2	RefSeq	1002	chr8	+	144779284	144780583		CTGCAATATTCTTCTTTGGGAAGTACAATGCCAAGTAAATAAAGATATTTGGGGTCATTC	286076	intergenic							104.186	58.9711	6.66498	5.86618
ASHGA5P017992	1.05708	up	noncoding	ENST00000448049	LINC00319	GENCODE	3507	chr21	+	44866480	44873773		TCAGCTGTAATGTGCTGTGACTATCGTAAAGTTCCTTCCGGGTGCAGAGTGATACATGAA	284836	intergenic							51.3037	48.3502	5.61367	5.53358
ASHGA5P019312	1.1669	up	noncoding	ENST00000477848	RP11-157P1.5	GENCODE	563	chr20	+	60928065	60931271		TGCCCCTCAGCAGGTACGCCCGGGAACAGCTGGGTGCTGTTGGCCAGGTAGGCCTGGAAG		natural antisense	NM_005560	LAMA5	laminin subunit alpha-5 precursor	-	60884120	60942368	128.451	102.855	6.9798	6.75712
ASHGA5P013121	1.4153	up	noncoding	NR_052026	FAM221B	RefSeq	3137	chr9	-	35817013	35828744		AAGCCAAAAGCCACATCTAGACAGGCTTTAGATCCTGACAGACTATGGGTCTCTACATTG	392307	exon sense-overlapping	NM_001012446	FAM221B	protein FAM221B	-	35817013	35828744	49.3475	35.5642	5.55394	5.05283
ASHGA5P022150	1.10469	up	noncoding	ENST00000550506	RP11-362A1.1	GENCODE	1372	chr12	+	82347497	82386912		CAATTTCAAAGTCTCCTCCAAGATATTCTTATGTAACTACTCTACTTGTCACCTGGACAT		intergenic							873.153	664.826	9.76384	9.62019
ASHGA5P038333	1.20676	up	noncoding	ENST00000429871	RP4-630A11.3	GENCODE	423	chr1	+	65952088	65959871		GCAGCAAGCCAGGAACACATAATTGAAAGGAAATTTCTGTACTGGCGTATTATTTTTTCA		intron sense-overlapping	NM_001003679	LEPR	leptin receptor isoform 3 precursor	+	65886334	66101111	21.5325	19.4867	4.33073	4.05959
ASHGA5P038333	1.20676	up	noncoding	ENST00000429871	RP4-630A11.3	GENCODE	423	chr1	+	65952088	65959871		GCAGCAAGCCAGGAACACATAATTGAAAGGAAATTTCTGTACTGGCGTATTATTTTTTCA		intron sense-overlapping	NM_001003680	LEPR	leptin receptor isoform 2 precursor	+	65886334	66096095	21.5325	19.4867	4.33073	4.05959
ASHGA5P038333	1.20676	up	noncoding	ENST00000429871	RP4-630A11.3	GENCODE	423	chr1	+	65952088	65959871		GCAGCAAGCCAGGAACACATAATTGAAAGGAAATTTCTGTACTGGCGTATTATTTTTTCA		intron sense-overlapping	NM_002303	LEPR	leptin receptor isoform 1 precursor	+	65886334	66103176	21.5325	19.4867	4.33073	4.05959
ASHGA5P036934	1.12214	up	noncoding	NR_028370	PCNA-AS1	RefSeq	384	chr20	+	5100231	5100615		TGAGACCTAGAAAGACAACGACCACTCTGCTACGCCTGCAACCGTTTAATGCCGCCGCGT	100302739	natural antisense	NM_002592	PCNA	proliferating cell nuclear antigen	-	5095598	5107268	280.79	220.337	8.13326	7.967
ASHGA5P036934	1.12214	up	noncoding	NR_028370	PCNA-AS1	RefSeq	384	chr20	+	5100231	5100615		TGAGACCTAGAAAGACAACGACCACTCTGCTACGCCTGCAACCGTTTAATGCCGCCGCGT	100302739	natural antisense	NM_182649	PCNA	proliferating cell nuclear antigen	-	5095598	5100647	280.79	220.337	8.13326	7.967
ASHGA5P037950	1.1902	up	noncoding	ENST00000434942	RP1-90G24.10	GENCODE	876	chr22	+	32601101	32665653		AATCAAGGAACTGGAGCCCCAGCTGACAATTCTATATCAGAACCCAAAGACGCTGAAGTT		intronic antisense	NM_014227	SLC5A4	low affinity sodium-glucose cotransporter	-	32614462	32651318	384.673	280.396	8.57672	8.32552
ASHGA5P005909	1.20674	up	noncoding	ENST00000311237	ZNF826P	pseudogene	1843	chr19	-	20577387	20592757		TTAGAGAACTACAGACACCTGGTCTTCCTTGGGTATTGTTCTCTCCAAGCCAGAACTGAT	664701								3718.14	2526.84	11.8426	11.5715
ASHGA5P048789	1.09461	up	noncoding	ENST00000443076	RP5-1166H10.2	GENCODE	454	chr1	+	31198566	31199211		TATAAACCACCCAGGGTCACACAAGGGCCATCCACGGTGACCAGCGGTGAGAAACGCAAT		intergenic							15.5764	15.8009	3.84253	3.71212
ASHGA5P047127	2.50513	up	noncoding	ENST00000451706	RP11-323P17.1	GENCODE	907	chr10	-	122522912	122551437		CAAATCGCAGAGGGAAGCTTCAAATACACTTCTAATCATCCTCAGTACCCAGCAGTATAT		intergenic							152.226	60.5247	7.23374	5.90885
ASHGA5P015339	1.0758	up	noncoding	ENST00000419467	AP000472.2	GENCODE	465	chr21	-	23413492	23426688		TAGAAAACACAGAGTTGTTGTTATGATGAGTCTCCAATGAACCTGCTGCATCCCTGCTGC		intergenic							206.281	171.702	7.6845	7.57909
ASHGA5P016653	1.10363	up	noncoding	ENST00000432583	FAM138B	GENCODE	1093	chr2	+	114334958	114336486		ACATCCAGCACGTGCTGCCCCTGCAGTGAGATGTGGCCATCGGAGCCAGCATTGGCCAAT		intergenic							108.383	92.5154	6.73014	6.58789
ASHGA5P047574	1.15689	up	noncoding	uc001kfc.1	AK130076	UCSC_knowngene	1770	chr10	+	89706924	89708694		CAGGGGTGTGTGTGTGTAGTTAAAGATCAATTTAACTTAAAAGGTCTTGGTTAGAGAATA		intron sense-overlapping	NM_000314	PTEN	phosphatidylinositol 3,4,5-trisphosphate 3-phosphatase and dual-specificity protein phosphatase PTEN	+	89623194	89728532	13358.6	9661.43	13.6761	13.4658
ASHGA5P035570	1.24607	up	noncoding	TCONS_00004320	XLOC_002185	LincRNAs identified by Cabili et al	1148	chr2	-	83094015	83095308		ACTGAAGGGATTCTGAAGGGCTACTGGCTCCACATATTTTACACATTAAACCTTTCCAAG		intergenic							143.366	107.995	7.14795	6.83056
ASHGA5P034397	1.07067	up	noncoding	uc010xhe.2	DKFZp434J194	UCSC_knowngene	2190	chr19	+	3121806	3123996		CCGATGGAAGTCGACTTTTCATATCTTTCTCCTGAAATGAACTCTGTTTTAAATTGGAAT		intergenic							36128.2	29336.9	15.0942	14.9957
ASHGA5P020374	1.01521	up	noncoding	ENST00000512508	CTC-338M12.6	GENCODE	500	chr5	+	180622495	180626977		TAGAAAACATCAAAGTGCATACGTGTAGCAAAGACCTCCAACCCCAGGAAAATCAGGGCA		natural antisense	NM_203293	TRIM7	tripartite motif-containing protein 7 isoform 1	-	180620923	180632177	76.8509	71.697	6.21001	6.18823
ASHGA5P020374	1.01521	up	noncoding	ENST00000512508	CTC-338M12.6	GENCODE	500	chr5	+	180622495	180626977		TAGAAAACATCAAAGTGCATACGTGTAGCAAAGACCTCCAACCCCAGGAAAATCAGGGCA		natural antisense	NM_203294	TRIM7	tripartite motif-containing protein 7 isoform 3	-	180620923	180631340	76.8509	71.697	6.21001	6.18823
ASHGA5P020374	1.01521	up	noncoding	ENST00000512508	CTC-338M12.6	GENCODE	500	chr5	+	180622495	180626977		TAGAAAACATCAAAGTGCATACGTGTAGCAAAGACCTCCAACCCCAGGAAAATCAGGGCA		natural antisense	NM_203295	TRIM7	tripartite motif-containing protein 7 isoform 3	-	180620923	180631340	76.8509	71.697	6.21001	6.18823
ASHGA5P020374	1.01521	up	noncoding	ENST00000512508	CTC-338M12.6	GENCODE	500	chr5	+	180622495	180626977		TAGAAAACATCAAAGTGCATACGTGTAGCAAAGACCTCCAACCCCAGGAAAATCAGGGCA		natural antisense	NM_203296	TRIM7	tripartite motif-containing protein 7 isoform 3	-	180620923	180631340	76.8509	71.697	6.21001	6.18823
ASHGA5P020374	1.01521	up	noncoding	ENST00000512508	CTC-338M12.6	GENCODE	500	chr5	+	180622495	180626977		TAGAAAACATCAAAGTGCATACGTGTAGCAAAGACCTCCAACCCCAGGAAAATCAGGGCA		natural antisense	NM_203297	TRIM7	tripartite motif-containing protein 7 isoform 2	-	180620923	180627930	76.8509	71.697	6.21001	6.18823
ASHGA5P026117	1.5683	up	noncoding	ENST00000436539	AP006285.6	GENCODE	587	chr11	+	1709526	1710286	ENST00000415865	CCTGGGTTTTGATGAGAGCATATTCTGTCATTATATTTAACAGGTGTTTTCCCCAGCTTG		intronic antisense	NM_053005	MOB2	MOB kinase activator 2 isoform 2	-	1490684	1785501	1127.45	606.733	10.1336	9.48435
ASHGA5P036886	1.32141	up	noncoding	ENST00000423020	RP5-963E22.4	GENCODE	542	chr20	-	61798148	61812255		AGAAGAGCAGAGAGATGAAGGCCTCCATGCCACAGCCCAGGCCGTGCACATTTGTGTTGA		intergenic							127.956	91.5802	6.97523	6.57316
ASHGA5P017366	1.36574	up	noncoding	ENST00000440714	AF064858.10	GENCODE	292	chr21	-	40400460	40401053		GGATAAAGTTAAGCCATGATGACCTTGTTGAATCCAGCCATTCTGCAAGTGCCTGTTTTG		intergenic							67.0916	49.1504	6.01061	5.56093
ASHGA5P036996	1.47105	up	noncoding	uc002wvf.3	BC052952	UCSC_knowngene	4599	chr20	+	25936452	25949924		CTCATGCATAGTAAAGCAGAGAGGAATGTAAAAGGTTGCTGCATGGATAATCAATTTCTG		intergenic							75.8877	51.4534	6.19038	5.63353
ASHGA5P026553	1.44769	up	noncoding	R66218		LincRNAs identified by Khalil et al	462	chr6	-	163789685	163790060		AACAAGCAGAGAAGGCCCAGGGTCGGTTTATTGACTTCTAAGGACTATTGGTCTTTTGCA		intergenic							89.9165	60.5639	6.4436	5.90985
ASHGA5P031469	1.05049	up	noncoding	TCONS_00006004	XLOC_002630	LincRNAs identified by Cabili et al	689	chr3	+	44469431	44470957		AGAATGAAGCAGAGGGCTGTGGGGTGAAGGGACTGCCAGTCTTCTGCCACTCCTTTTCGT		intergenic							228.728	193.428	7.83367	7.76261
ASHGA5P047560	1.23176	up	noncoding	NR_029408	LOC439994	RefSeq	1179	chr10	+	89102167	89103331	NR_029407	TTACCCTTATGGCTAAAATAAACTGCTAGGCCCTGAAGCAAAGGCGAGCCATGTTCTAGA	439994	intergenic							11520.1	7850.36	13.4781	13.1773
ASHGA5P034129	1.09379	up	noncoding	ENST00000562262	CTC-457E21.1	GENCODE	3355	chr19	-	22703796	22710751		GGACAAGTGGCTGTTTCTGTGACATATTTATTTTTACTGGCGTTTCATGTTGCTTAAAAA		intergenic							544.848	421.621	9.07227	8.94294
ASHGA5P017543	1.16638	up	noncoding	ENST00000442889	RP11-312B8.1	GENCODE	415	chr1	-	6843951	6844903		AAAGTTGAATCAAAATAAGTGAAAAATCCTCGTTCAAGTGTTCTGGCATTAAGATTGACT		bidirectional	NM_001195563	CAMTA1	calmodulin-binding transcription activator 1 isoform 2	+	6845383	6932107	227.007	174.318	7.82175	7.5997
ASHGA5P017543	1.16638	up	noncoding	ENST00000442889	RP11-312B8.1	GENCODE	415	chr1	-	6843951	6844903		AAAGTTGAATCAAAATAAGTGAAAAATCCTCGTTCAAGTGTTCTGGCATTAAGATTGACT		bidirectional	NM_001242701	CAMTA1	calmodulin-binding transcription activator 1 isoform 3	+	6845383	6948261	227.007	174.318	7.82175	7.5997
ASHGA5P017543	1.16638	up	noncoding	ENST00000442889	RP11-312B8.1	GENCODE	415	chr1	-	6843951	6844903		AAAGTTGAATCAAAATAAGTGAAAAATCCTCGTTCAAGTGTTCTGGCATTAAGATTGACT		bidirectional	NM_015215	CAMTA1	calmodulin-binding transcription activator 1 isoform 1	+	6845383	7829766	227.007	174.318	7.82175	7.5997
ASHGA5P044338	2.95108	up	noncoding	ENST00000520894	RP11-434I12.2	GENCODE	430	chr8	-	74209945	74227844		CTGAGCAGTAATTTGGAAGCCTAAATCCTGACTTTAGAAATTCATAAGAACAACCAATGT		intronic antisense	NM_172037	RDH10	retinol dehydrogenase 10	+	74206836	74237520	49.1268	18.6178	5.54679	3.98555
ASHGA5P043757	1.33423	up	noncoding	ENST00000441237	PMS2P9	pseudogene	515	chr7	+	76669260	76673093	ENST00000412466, ENST00000414507, ENST00000418756, ENST00000422064, ENST00000430602, ENST00000437568, ENST00000451831, ENST00000529061, ENST00000533167, NR_003614, NR_022007, NR_023383, NR_027775, NR_027776, NR_027777, NR_028058, NR_028059, NR_046297, NR_046299, uc003tvo.2, uc003tvs.4, uc003txh.4, uc003txn.4, uc003ubz.1, uc003uch.1, uc003ucm.3, uc003uco.1, uc003ucq.3, uc003udq.3, uc010las.1, uc01…	GTACTGAGTCTAAGCACTGGATGAAGAAGATAGTAGAAAACAGTCTGGATGCTGGTGCCA									415.592	270.744	8.68553	8.26952
ASHGA5P042115	3.76399	up	noncoding	ENST00000431143	RP11-497D6.4	GENCODE	644	chr6	-	147232961	147453122	uc003qlv.3	ATGGATTCCAAGCTAGAACAAGGTCTATCTGGAGGTGAAGTCATGTGACATGAACTAATG		intergenic							38.7605	12.1163	5.18994	3.27768
ASHGA5P028768	1.58772	up	noncoding	ENST00000442716	RP11-37L2.1	GENCODE	385	chr13	+	34185103	34185659		CAGGCTTTCAAACCTCCTATTCTTTGCACTACATTATTTGAATAAACCGTAAATACCCTT		intronic antisense	NM_001243476	STARD13	stAR-related lipid transfer protein 13 isoform 4	-	33677271	34250932	63.5269	40.6185	5.93008	5.26312
ASHGA5P020794	2.45982	up	noncoding	uc003xew.3	BC034827	UCSC_knowngene	3172	chr8	-	26236776	26240469		CGTTTATCCTATGTTAATGGCTAGTTACTCTTCAGATGAACTTAAAAATGGACTTGTCCA		natural antisense	ENST00000380629	BNIP3L	BCL2/adenovirus E1B 19kDa interacting protein 3-like [Source:HGNC Symbol;Acc:1085]	+	26240413	26270645	24.4188	11.5359	4.51413	3.21558
ASHGA5P021205	1.7556	up	noncoding	NR_028026	CREBZF	RefSeq	4618	chr11	-	85368607	85376182		CTGGAAAGCACTTAGCAGTGTCTGCAAAAACGAATCTTTTCCTACAACCTGTTAACTGAC	58487	exon sense-overlapping	NM_001039618	CREBZF	CREB/ATF bZIP transcription factor	-	85368607	85376182	493.392	244.342	8.92846	8.1165
ASHGA5P057995	1.05418	up	noncoding	TCONS_00024752	XLOC_012037	LincRNAs identified by Cabili et al	564	chr16	-	85613415	85615768		TCCACCCCAGGAGCTCAGCAAACATCCACAGAGTGAACATTCCAAGCAACATAGTCCAGG		intergenic							171.525	146.841	7.40554	7.32941
ASHGA5P027402	1.2539	up	noncoding	ENST00000489520	RPSAP52	GENCODE	1144	chr12	-	66151799	66220754		TCTTGCACGGACTCTTAAGCAACATGAAAATAAGGTTGACAGAAAATAAACATCAGTTTC	204010	intronic antisense	NM_003483	HMGA2	high mobility group protein HMGI-C isoform a	+	66218239	66360071	4840.92	3173.01	12.2416	11.9152
ASHGA5P027402	1.2539	up	noncoding	ENST00000489520	RPSAP52	GENCODE	1144	chr12	-	66151799	66220754		TCTTGCACGGACTCTTAAGCAACATGAAAATAAGGTTGACAGAAAATAAACATCAGTTTC	204010	intronic antisense	NM_003484	HMGA2	high mobility group protein HMGI-C isoform b	+	66218239	66309307	4840.92	3173.01	12.2416	11.9152
ASHGA5P028200	1.31917	up	noncoding	NR_028138	LOC338758	RefSeq	2998	chr12	+	90102731	90105729		TTAGACCTAACTTATCCCATGTGTTTAACTGATCTAGAGATGTATCTTTGCATAAGGAAC	338758	natural antisense	ENST00000551310	ATP2B1	ATPase, Ca++ transporting, plasma membrane 1 [Source:HGNC Symbol;Acc:814]	-	90049359	90103077	12.1331	10.3831	3.48196	3.08233
ASHGA5P018013	1.4001	up	noncoding	ENST00000448371	RP11-157P1.4	GENCODE	307	chr20	-	60880487	60881452		TCCCAGGAAACCCTGAGCTCACAGCACCCACGCACACCCCGAATGGCTATGGAAGCTGCA		intronic antisense	NM_007002	ADRM1	proteasomal ubiquitin receptor ADRM1 precursor	+	60878026	60883918	1153.98	690.357	10.1639	9.67832
ASHGA5P018013	1.4001	up	noncoding	ENST00000448371	RP11-157P1.4	GENCODE	307	chr20	-	60880487	60881452		TCCCAGGAAACCCTGAGCTCACAGCACCCACGCACACCCCGAATGGCTATGGAAGCTGCA		intronic antisense	NM_175573	ADRM1	proteasomal ubiquitin receptor ADRM1 precursor	+	60878026	60883918	1153.98	690.357	10.1639	9.67832
ASHGA5P000171	1.27574	up	noncoding	chr1:47977525-47990050-	chr1:47977525-47990050	LincRNAs identified by Khalil et al	12525	chr1	-	48204938	48217463		ACCCACCCAGCCACTTGATTTTTCCCACCTTTAAGTTCCTATGGTACTTACTTCTGGTGA		intergenic							1093.73	715.434	10.0877	9.7364
ASHGA5P036237	1.1607	up	noncoding	TCONS_00026864	XLOC_012912	LincRNAs identified by Cabili et al	487	chr19	+	1261353	1262238		TCAAAGATGGGAGGAAAGGCGAGGCTGACAAGGACCCTAAACGGTGATTCCCCAAGTCGG		intergenic							85.0107	69.4367	6.35628	6.14128
ASHGA5P035167	1.08986	up	noncoding	ENST00000435380	NEURL3	GENCODE	1675	chr2	-	97163382	97173846		ATCTCCTGCTCTGTGCCCGCGCAGTCCAGTGGAGGAGATATTCCTAATTAGGGGGCACTT	93082	intergenic							624.006	480.798	9.26658	9.14243
ASHGA5P037394	1.21477	up	noncoding	ENST00000435697	LINC00478	GENCODE	716	chr21	+	17791751	17860215		CATCAGGAAGGCAATTCTGTGTGCATGTGTGTGTGTATATATATAGTTAGAAGTTAGAAA	388815	intergenic							8773.97	5995.71	13.1048	12.8241
ASHGA5P056797	1.39196	up	noncoding	TCONS_00008737	XLOC_003422	LincRNAs identified by Cabili et al	3663	chr4	+	1548555	1552409		CCTGGCCCAGAAAACCCGTCCACAGCATCTGTCGACCAAAAGAAGAACCGCCAGAGTCCA		intergenic							174.444	116.121	7.43123	6.95412
ASHGA5P032454	1.98601	up	noncoding	ENST00000441312	AC015936.3	GENCODE	504	chr17	-	42980528	42981914		CTTGTTAAGAGCTGTGGAGATCAGTGTTTGTTTACCATAAAGATTTTGCTTTTTCCCTTT		natural antisense	NM_001258395	CCDC103	coiled-coil domain-containing protein 103 isoform 1	+	42977079	42981047	27.8122	15.8488	4.70654	3.71666
ASHGA5P032454	1.98601	up	noncoding	ENST00000441312	AC015936.3	GENCODE	504	chr17	-	42980528	42981914		CTTGTTAAGAGCTGTGGAGATCAGTGTTTGTTTACCATAAAGATTTTGCTTTTTCCCTTT		natural antisense	NM_001258396	CCDC103	coiled-coil domain-containing protein 103 isoform 1	+	42977079	42981047	27.8122	15.8488	4.70654	3.71666
ASHGA5P032454	1.98601	up	noncoding	ENST00000441312	AC015936.3	GENCODE	504	chr17	-	42980528	42981914		CTTGTTAAGAGCTGTGGAGATCAGTGTTTGTTTACCATAAAGATTTTGCTTTTTCCCTTT		natural antisense	NM_001258397	CCDC103	coiled-coil domain-containing protein 103 isoform 2	+	42977079	42981047	27.8122	15.8488	4.70654	3.71666
ASHGA5P032454	1.98601	up	noncoding	ENST00000441312	AC015936.3	GENCODE	504	chr17	-	42980528	42981914		CTTGTTAAGAGCTGTGGAGATCAGTGTTTGTTTACCATAAAGATTTTGCTTTTTCCCTTT		natural antisense	NM_001258398	CCDC103	coiled-coil domain-containing protein 103 isoform 3	+	42977079	42981047	27.8122	15.8488	4.70654	3.71666
ASHGA5P032454	1.98601	up	noncoding	ENST00000441312	AC015936.3	GENCODE	504	chr17	-	42980528	42981914		CTTGTTAAGAGCTGTGGAGATCAGTGTTTGTTTACCATAAAGATTTTGCTTTTTCCCTTT		natural antisense	NM_001258399	CCDC103	coiled-coil domain-containing protein 103 isoform 4	+	42977079	42981047	27.8122	15.8488	4.70654	3.71666
ASHGA5P032454	1.98601	up	noncoding	ENST00000441312	AC015936.3	GENCODE	504	chr17	-	42980528	42981914		CTTGTTAAGAGCTGTGGAGATCAGTGTTTGTTTACCATAAAGATTTTGCTTTTTCCCTTT		natural antisense	NM_213607	CCDC103	coiled-coil domain-containing protein 103 isoform 1	+	42977079	42981047	27.8122	15.8488	4.70654	3.71666
ASHGA5P015558	1.07912	up	noncoding	uc003qgo.3	LINC00271	UCSC_knowngene	768	chr6	+	135818938	136037193	NR_026805	ACTCGGAGCGATTATAGATCCAGACTCCTGTGCCTGACCACTGCCCATGGCCAACTCTCT	100131814	bidirectional	NM_001134830	AHI1	jouberin isoform a	-	135605109	135818903	778.115	607.588	9.5976	9.48774
ASHGA5P015558	1.07912	up	noncoding	uc003qgo.3	LINC00271	UCSC_knowngene	768	chr6	+	135818938	136037193	NR_026805	ACTCGGAGCGATTATAGATCCAGACTCCTGTGCCTGACCACTGCCCATGGCCAACTCTCT	100131814	bidirectional	NM_001134831	AHI1	jouberin isoform a	-	135605109	135818903	778.115	607.588	9.5976	9.48774
ASHGA5P015558	1.07912	up	noncoding	uc003qgo.3	LINC00271	UCSC_knowngene	768	chr6	+	135818938	136037193	NR_026805	ACTCGGAGCGATTATAGATCCAGACTCCTGTGCCTGACCACTGCCCATGGCCAACTCTCT	100131814	bidirectional	NM_001134832	AHI1	jouberin isoform b	-	135708921	135818903	778.115	607.588	9.5976	9.48774
ASHGA5P015558	1.07912	up	noncoding	uc003qgo.3	LINC00271	UCSC_knowngene	768	chr6	+	135818938	136037193	NR_026805	ACTCGGAGCGATTATAGATCCAGACTCCTGTGCCTGACCACTGCCCATGGCCAACTCTCT	100131814	bidirectional	NM_017651	AHI1	jouberin isoform a	-	135605109	135818903	778.115	607.588	9.5976	9.48774
ASHGA5P048284	1.09519	up	noncoding	ENST00000524619	AP000487.5	GENCODE	392	chr11	-	70227196	70244408		GGAGTTTACCCCACATTCCCTTAATTAAAAAGCCATTAAAATAGTCAACTTTGCTGGGCA		intronic antisense	NM_003626	PPFIA1	liprin-alpha-1 isoform b	+	70116805	70230607	425.418	333.975	8.71903	8.58785
ASHGA5P015046	1.58875	up	noncoding	ENST00000415965	AC002456.2	GENCODE	317	chr7	-	90219932	90225062		ACTGGGTGCGGTAATTGTACATTTTTTCATCCTACATCTCAAGAGACCAAGGGACCTAAG		intronic antisense	ENST00000430760	CDK14	cyclin-dependent kinase 14 [Source:HGNC Symbol;Acc:8883]	+	90193087	90419943	443.71	243.054	8.77633	8.10844
ASHGA5P015046	1.58875	up	noncoding	ENST00000415965	AC002456.2	GENCODE	317	chr7	-	90219932	90225062		ACTGGGTGCGGTAATTGTACATTTTTTCATCCTACATCTCAAGAGACCAAGGGACCTAAG		intronic antisense	ENST00000446224	CDK14	cyclin-dependent kinase 14 [Source:HGNC Symbol;Acc:8883]	+	90193087	90419942	443.71	243.054	8.77633	8.10844
ASHGA5P015046	1.58875	up	noncoding	ENST00000415965	AC002456.2	GENCODE	317	chr7	-	90219932	90225062		ACTGGGTGCGGTAATTGTACATTTTTTCATCCTACATCTCAAGAGACCAAGGGACCTAAG		intronic antisense	ENST00000449528	CDK14	cyclin-dependent kinase 14 [Source:HGNC Symbol;Acc:8883]	+	90095737	90419943	443.71	243.054	8.77633	8.10844
ASHGA5P015046	1.58875	up	noncoding	ENST00000415965	AC002456.2	GENCODE	317	chr7	-	90219932	90225062		ACTGGGTGCGGTAATTGTACATTTTTTCATCCTACATCTCAAGAGACCAAGGGACCTAAG		intronic antisense	ENST00000456689	CDK14	cyclin-dependent kinase 14 [Source:HGNC Symbol;Acc:8883]	+	90193087	90419943	443.71	243.054	8.77633	8.10844
ASHGA5P017913	1.51401	up	noncoding	ENST00000447072	RP11-497D6.4	GENCODE	347	chr6	-	147181792	147453054		TATTGAAATGGTGGTGACCAGATGGATATAAACGGGCTGTGGAAAAAGAGAATGCATGGC		intergenic							28.6772	20.5175	4.74815	4.14978
ASHGA5P039082	1.08024	up	noncoding	ENST00000495094	WWTR1-AS1	GENCODE	975	chr3	+	149374806	149376098		AAAGTTGAGCTGTTGAATTATGTATGACCTCCTAGTCCCTAGCCGGCCAGCCCCCGCTCG	100128025	natural antisense	NM_001168278	WWTR1	WW domain-containing transcription regulator protein 1	-	149235021	149421060	562	439.246	9.11618	9.00484
ASHGA5P039082	1.08024	up	noncoding	ENST00000495094	WWTR1-AS1	GENCODE	975	chr3	+	149374806	149376098		AAAGTTGAGCTGTTGAATTATGTATGACCTCCTAGTCCCTAGCCGGCCAGCCCCCGCTCG	100128025	natural antisense	NM_001168280	WWTR1	WW domain-containing transcription regulator protein 1	-	149235021	149375812	562	439.246	9.11618	9.00484
ASHGA5P039082	1.08024	up	noncoding	ENST00000495094	WWTR1-AS1	GENCODE	975	chr3	+	149374806	149376098		AAAGTTGAGCTGTTGAATTATGTATGACCTCCTAGTCCCTAGCCGGCCAGCCCCCGCTCG	100128025	natural antisense	NM_015472	WWTR1	WW domain-containing transcription regulator protein 1	-	149235021	149375888	562	439.246	9.11618	9.00484
ASHGA5P028996	1.32398	up	noncoding	TCONS_00010536	XLOC_005062	LincRNAs identified by Cabili et al	246	chr5	-	157897830	157905362		AATCGTGGCCATGAAATTCACTGTGAATTTCTCAGGTCTTCCACCAGATTTGGGTTGACC		intergenic							108.011	77.6516	6.7238	6.31891
ASHGA5P045333	1.2754	up	noncoding	ENST00000439872	RP11-54O15.3	GENCODE	487	chr9	-	97690832	97697228		CAACTTAATTTAAAAAGGAAACACAGCAGATGTCATCAGTTGGCAGGGAGGTGTCTTGAA		intronic antisense	NM_001193329	C9orf3	aminopeptidase O isoform 1	+	97521930	97849500	65.3656	51.1046	5.97267	5.62173
ASHGA5P045333	1.2754	up	noncoding	ENST00000439872	RP11-54O15.3	GENCODE	487	chr9	-	97690832	97697228		CAACTTAATTTAAAAAGGAAACACAGCAGATGTCATCAGTTGGCAGGGAGGTGTCTTGAA		intronic antisense	NM_001193331	C9orf3	aminopeptidase O isoform 4	+	97488950	97695955	65.3656	51.1046	5.97267	5.62173
ASHGA5P045333	1.2754	up	noncoding	ENST00000439872	RP11-54O15.3	GENCODE	487	chr9	-	97690832	97697228		CAACTTAATTTAAAAAGGAAACACAGCAGATGTCATCAGTTGGCAGGGAGGTGTCTTGAA		intronic antisense	NM_032823	C9orf3	aminopeptidase O isoform 2	+	97488950	97849500	65.3656	51.1046	5.97267	5.62173
ASHGA5P058361	1.09409	up	noncoding	uc010aeh.1	AK127969	UCSC_knowngene	3223	chr13	-	64402979	64418258	uc001vih.1	TCGGAAATCCCAAGGAGGCGTCGGACCCCGTCCGATAGTAAATCCCAAGTAAGGTACCTG		intergenic							44.8386	41.0403	5.40987	5.28014
ASHGA5P023428	2.56642	up	noncoding	ENST00000580714	CTD-2350C19.2	GENCODE	493	chr17	+	26732257	26733814		CCAGTGGGAGGCTAGCCAATATTAACCATCGCTATCTACCGCTGAGGAAACGAGGTCATC		natural antisense	NM_001242366	SLC46A1	proton-coupled folate transporter isoform 2	-	26721660	26733230	34.4273	15.2695	5.01759	3.65783
ASHGA5P023428	2.56642	up	noncoding	ENST00000580714	CTD-2350C19.2	GENCODE	493	chr17	+	26732257	26733814		CCAGTGGGAGGCTAGCCAATATTAACCATCGCTATCTACCGCTGAGGAAACGAGGTCATC		natural antisense	NM_080669	SLC46A1	proton-coupled folate transporter isoform 1	-	26721660	26733230	34.4273	15.2695	5.01759	3.65783
ASHGA5P000023	1.06701	up	noncoding	AI862052		LincRNAs identified by Khalil et al	463	chr3	-	137766642	137767720		TCTCACCCTGACCATTGCTTCGTGTGAGAGCTTGAGTATTCATGCTGTGATGTGTGGATT		intergenic							96.5069	84.8331	6.55298	6.45941
ASHGA5P029863	1.74442	up	noncoding	ENST00000558484	WHAMMP3	GENCODE	538	chr15	-	23191210	23192002		TTTTATGCTATACCAGGGTAACACTAAAAACCATGTAGGTGATTTGTATTATTCCACCAG	339005	intergenic							13.4363	8.47647	3.62015	2.8174
ASHGA5P020591	1.0097	up	noncoding	NR_027108	LOC285593	RefSeq	1781	chr5	+	173006645	173012075		TTTCCACAAGGTCAGCAAAAATTAGAAAGTCAGCTAATGCCAAGTGTTAGCTGGAGTAGG	285593	intergenic							5.49962	5	2.43948	2.42556
ASHGA5P025800	1.38847	up	noncoding	NR_038131	UNK	RefSeq	1353	chr17	+	73780919	73790279		ATGCCTGAAGCTATGGTTGATACTAAAGGAGGTTTTCCCACTATCCGTATGCATCTTCTC	85451	exon sense-overlapping	NM_001080419	UNK	RING finger protein unkempt homolog	+	73780919	73821886	387.544	243.48	8.58516	8.11166
ASHGA5P056197	1.14932	up	noncoding	TCONS_00000938	XLOC_000190	LincRNAs identified by Cabili et al	1008	chr1	+	51443452	51475968		AGGCGCCCTCGGAGCACAGACTGAGGAATTGCGCTTGGCCTAATAAGAATGATTCCCCTG		intergenic							129.504	105.279	6.99199	6.79121
ASHGA5P037751	1.58123	up	noncoding	TCONS_00024847	XLOC_011730	LincRNAs identified by Cabili et al	337	chr16	+	54881150	54888858		AACCAACCATTCCATCCGTATGAAGAGCGTAAGTCCTAGATTTGCGTCGTGATGTCATCT		intergenic							2159.31	1122.09	11.0705	10.4094
ASHGA5P020858	1.30754	up	noncoding	ENST00000520930	AC084082.3	GENCODE	451	chr8	+	67024901	67027014		GCCAGAGGAGGGACTCATCTGAGGCTAAGCTGCCCATAGTTCGGGGAGACCCACAGGGAA		intergenic							47.4802	36.8816	5.4961	5.10924
ASHGA5P057060	1.58457	up	noncoding	TCONS_00012371	XLOC_005939	LincRNAs identified by Cabili et al	5425	chr6	-	169818924	169846389		GTTTCACTGGATGAGGACAGCTCTGTGCCAGAGAATGAGCTGGGATCTGCCCTGACAAGT		intergenic							261.67	149.691	8.02584	7.36175
ASHGA5P017499	1.15106	up	noncoding	ENST00000442387	AC130710.1	GENCODE	472	chr2	+	16213519	16221239		TTTGAAGATGGCGCCTACCTTCGGGGTGTGGAGGTAGAGACAGGAGAGAAGCTCAGGATG		intergenic							33.1013	29.6637	4.9526	4.74963
ASHGA5P054371	1.37096	up	noncoding	NR_038222	LOC219731	RefSeq	3163	chr10	-	11891606	11936709		GGTGGGCCTCAGTCGCATGCAGGACAGCACCGCGTGCGGCAGCTGCTCTGGTGGCCTCCT	219731	natural antisense	NM_153256	C10orf47	uncharacterized protein C10orf47	+	11865396	11914276	51.1852	37.956	5.6102	5.15501
ASHGA5P040196	1.82274	up	noncoding	ENST00000417474	AC097467.2	GENCODE	449	chr4	+	156275367	156281613		GTGATTTCTTCATTTGGATCTATTTTGAGACAGAGTAATAGCATTAAAACCCCCTTCTGA		natural antisense	NM_001039580	MAP9	microtubule-associated protein 9	-	156263811	156298122	70.085	39.3116	6.07485	5.20874
ASHGA5P030906	1.39414	up	noncoding	ENST00000570901	RP11-473M20.14	GENCODE	490	chr16	-	3175529	3179300		TACCCAGTTCATTTCTTTCTGGCATTTGTAACTACTTGAAGTTAAAGTGTGTGCCATGTA		bidirectional	ENST00000573771	ZNF213	zinc finger protein 213 [Source:HGNC Symbol;Acc:13005]	+	3179777	3187435	891.457	539.508	9.79036	9.31098
ASHGA5P028903	1.07902	up	noncoding	uc001vmb.1	AK055459	UCSC_knowngene	2984	chr13	+	95364969	95368197		CCTCTTGCCTGAATCTGGTTGAGCTTTTAACAAAGTAAATTTTCAAGCCATTTTCATTCA		bidirectional	NM_007084	SOX21	transcription factor SOX-21	-	95361878	95364389	61.5367	55.8935	5.88633	5.7766
ASHGA5P017435	1.12354	up	noncoding	ENST00000441570	LINC00472	GENCODE	475	chr6	-	72126179	72129970		TTTTACAAAAGAACATTAAAATCTCCCCAGATGCTCACTGCTCTGATCATTTCCCCTACA	79940	intergenic							878.788	657.722	9.77109	9.60304
ASHGA5P038475	1.45576	up	noncoding	NR_034032	LOC100289361	RefSeq	640	chr3	-	142719686	142720309		GGAGACAGTCAATAAGAGAAAATCGTAAATACAGATGGTATTCTAAATCTAGCATGCATG	100289361	natural antisense	ENST00000473835	U2SURP	U2 snRNP-associated SURP domain containing [Source:HGNC Symbol;Acc:30855]	+	142720180	142779388	3651.05	2064.11	11.8236	11.2818
ASHGA5P055466	1.85555	up	noncoding	TCONS_00029068	XLOC_013994	LincRNAs identified by Cabili et al	312	chr21	-	9826393	9827584	TCONS_00029072	ACCATGGTAGGCACGGCGACTACCATCGAAAGTTGATAGGGCAGACGTTCGAATGGGTCG		intergenic							1258.57	567.718	10.2789	9.38707
ASHGA5P031281	1.81184	up	noncoding	ENST00000422207	GAS5	GENCODE	643	chr1	-	173833041	173834044	ENST00000412059, ENST00000422008, ENST00000436285, uc001gjk.3	GATGGGAGTGATTAGCTGTTTAAAAGTTAAAATGTGACTGAGAAGGAAATTGAGTAGGGC	60674	intergenic							1501.06	688.692	10.5323	9.67485
ASHGA5P028835	2.07078	up	noncoding	ENST00000456688	RP11-327P2.5	GENCODE	569	chr13	+	52378432	52387356		ATCTACTCACCTGAGGATTATGAGGATTATGAGTTTTATGGAGCAAAATTTGCCTAGAAC		bidirectional	NM_001031719	DHRS12	dehydrogenase/reductase SDR family member 12 isoform 1	-	52344912	52378298	56.5922	28.983	5.76154	4.71137
ASHGA5P028835	2.07078	up	noncoding	ENST00000456688	RP11-327P2.5	GENCODE	569	chr13	+	52378432	52387356		ATCTACTCACCTGAGGATTATGAGGATTATGAGTTTTATGGAGCAAAATTTGCCTAGAAC		bidirectional	NM_001270424	DHRS12	dehydrogenase/reductase SDR family member 12 isoform 3	-	52342128	52378298	56.5922	28.983	5.76154	4.71137
ASHGA5P028835	2.07078	up	noncoding	ENST00000456688	RP11-327P2.5	GENCODE	569	chr13	+	52378432	52387356		ATCTACTCACCTGAGGATTATGAGGATTATGAGTTTTATGGAGCAAAATTTGCCTAGAAC		bidirectional	NM_024705	DHRS12	dehydrogenase/reductase SDR family member 12 isoform 2	-	52342128	52378298	56.5922	28.983	5.76154	4.71137
ASHGA5P018957	2.29036	up	noncoding	uc010lnn.2	FLJ40852	UCSC_knowngene	1902	chr7	-	141404137	141438030	NR_015392, uc010lnm.2	ATGACAAAAGGAGTTGCTGCACAGGGGGAAAGCGAAGTTCCCAGGAGTAAGATGTGCAAG	285962	natural antisense	NM_001105558	WEE2	wee1-like protein kinase 2	+	141408152	141431071	29.6586	14.7551	4.79427	3.59869
ASHGA5P042021	1.89798	up	noncoding	ENST00000429007	RP1-293L8.5	GENCODE	501	chr6	-	126119001	126140004		GCCATGAAGTCAGTATTATTTTCATGTCTTGGCCATCTTAAGTTCCTGTTTTGTGAATAT		intronic antisense	NM_001122842	NCOA7	nuclear receptor coactivator 7 isoform 2	+	126111908	126253176	42.2019	23.8583	5.3216	4.39714
ASHGA5P042021	1.89798	up	noncoding	ENST00000429007	RP1-293L8.5	GENCODE	501	chr6	-	126119001	126140004		GCCATGAAGTCAGTATTATTTTCATGTCTTGGCCATCTTAAGTTCCTGTTTTGTGAATAT		intronic antisense	NM_001199619	NCOA7	nuclear receptor coactivator 7 isoform 1	+	126102306	126253176	42.2019	23.8583	5.3216	4.39714
ASHGA5P042021	1.89798	up	noncoding	ENST00000429007	RP1-293L8.5	GENCODE	501	chr6	-	126119001	126140004		GCCATGAAGTCAGTATTATTTTCATGTCTTGGCCATCTTAAGTTCCTGTTTTGTGAATAT		intronic antisense	NM_001199620	NCOA7	nuclear receptor coactivator 7 isoform 1	+	126102306	126253176	42.2019	23.8583	5.3216	4.39714
ASHGA5P042021	1.89798	up	noncoding	ENST00000429007	RP1-293L8.5	GENCODE	501	chr6	-	126119001	126140004		GCCATGAAGTCAGTATTATTTTCATGTCTTGGCCATCTTAAGTTCCTGTTTTGTGAATAT		intronic antisense	NM_001199621	NCOA7	nuclear receptor coactivator 7 isoform 3	+	126111908	126253176	42.2019	23.8583	5.3216	4.39714
ASHGA5P042021	1.89798	up	noncoding	ENST00000429007	RP1-293L8.5	GENCODE	501	chr6	-	126119001	126140004		GCCATGAAGTCAGTATTATTTTCATGTCTTGGCCATCTTAAGTTCCTGTTTTGTGAATAT		intronic antisense	NM_181782	NCOA7	nuclear receptor coactivator 7 isoform 1	+	126111908	126253176	42.2019	23.8583	5.3216	4.39714
ASHGA5P029325	1.31917	up	noncoding	ENST00000500370	SNHG10	GENCODE	1531	chr14	-	95998633	96001137		CTTATATCCTGAGACAGAACAGTAATGAGGAGTATCGTGTTCCTTACCTAATGTATAATA		natural antisense	ENST00000331334	GLRX5	glutaredoxin 5 [Source:HGNC Symbol;Acc:20134]	+	96000929	96011055	14.3348	12.5082	3.71872	3.31908
ASHGA5P042441	1.13219	up	noncoding	ENST00000450671	RP3-475N16.1	GENCODE	679	chr6	+	42908101	42911708		AACACAAACAGCAGAATGGCTCCATCTCTGTTGAAGACTTCCATCAACTAGAACCACGAG		intergenic							549.645	410.88	9.08281	8.9037
ASHGA5P041169	1.02269	up	noncoding	ENST00000565306	RP11-428C6.2	GENCODE	1075	chr5	+	73248764	73249839		AATAGAATGCCGTAGAGCCAGGAGCCTCAACAGACCTAAAGTGAATATAGAAGGCAACAC		intergenic							50.4602	49.0346	5.58937	5.55701
ASHGA5P025966	2.51419	up	noncoding	NR_047623	UTY	RefSeq	5971	chrY	-	15360258	15592550	NR_047614, NR_047615, NR_047632	CTGACTCAGGAATTGAGAGAAGAAATAATTTGAATTTTTTAATGAGTTCTTGGTGGCCCA	7404	exon sense-overlapping	NM_001258249	UTY	histone demethylase UTY isoform 4	-	15360258	15592550	23.6373	10.8799	4.47295	3.14286
ASHGA5P025966	2.51419	up	noncoding	NR_047623	UTY	RefSeq	5971	chrY	-	15360258	15592550	NR_047614, NR_047615, NR_047632	CTGACTCAGGAATTGAGAGAAGAAATAATTTGAATTTTTTAATGAGTTCTTGGTGGCCCA	7404	exon sense-overlapping	NM_001258250	UTY	histone demethylase UTY isoform 5	-	15360258	15592550	23.6373	10.8799	4.47295	3.14286
ASHGA5P025966	2.51419	up	noncoding	NR_047623	UTY	RefSeq	5971	chrY	-	15360258	15592550	NR_047614, NR_047615, NR_047632	CTGACTCAGGAATTGAGAGAAGAAATAATTTGAATTTTTTAATGAGTTCTTGGTGGCCCA	7404	exon sense-overlapping	NM_001258251	UTY	histone demethylase UTY isoform 6	-	15360258	15592550	23.6373	10.8799	4.47295	3.14286
ASHGA5P025966	2.51419	up	noncoding	NR_047623	UTY	RefSeq	5971	chrY	-	15360258	15592550	NR_047614, NR_047615, NR_047632	CTGACTCAGGAATTGAGAGAAGAAATAATTTGAATTTTTTAATGAGTTCTTGGTGGCCCA	7404	exon sense-overlapping	NM_001258252	UTY	histone demethylase UTY isoform 7	-	15360258	15592550	23.6373	10.8799	4.47295	3.14286
ASHGA5P025966	2.51419	up	noncoding	NR_047623	UTY	RefSeq	5971	chrY	-	15360258	15592550	NR_047614, NR_047615, NR_047632	CTGACTCAGGAATTGAGAGAAGAAATAATTTGAATTTTTTAATGAGTTCTTGGTGGCCCA	7404	exon sense-overlapping	NM_001258253	UTY	histone demethylase UTY isoform 8	-	15360258	15592550	23.6373	10.8799	4.47295	3.14286
ASHGA5P025966	2.51419	up	noncoding	NR_047623	UTY	RefSeq	5971	chrY	-	15360258	15592550	NR_047614, NR_047615, NR_047632	CTGACTCAGGAATTGAGAGAAGAAATAATTTGAATTTTTTAATGAGTTCTTGGTGGCCCA	7404	exon sense-overlapping	NM_001258254	UTY	histone demethylase UTY isoform 9	-	15360258	15592550	23.6373	10.8799	4.47295	3.14286
ASHGA5P025966	2.51419	up	noncoding	NR_047623	UTY	RefSeq	5971	chrY	-	15360258	15592550	NR_047614, NR_047615, NR_047632	CTGACTCAGGAATTGAGAGAAGAAATAATTTGAATTTTTTAATGAGTTCTTGGTGGCCCA	7404	exon sense-overlapping	NM_001258255	UTY	histone demethylase UTY isoform 10	-	15360258	15592550	23.6373	10.8799	4.47295	3.14286
ASHGA5P025966	2.51419	up	noncoding	NR_047623	UTY	RefSeq	5971	chrY	-	15360258	15592550	NR_047614, NR_047615, NR_047632	CTGACTCAGGAATTGAGAGAAGAAATAATTTGAATTTTTTAATGAGTTCTTGGTGGCCCA	7404	exon sense-overlapping	NM_001258256	UTY	histone demethylase UTY isoform 11	-	15360258	15592550	23.6373	10.8799	4.47295	3.14286
ASHGA5P025966	2.51419	up	noncoding	NR_047623	UTY	RefSeq	5971	chrY	-	15360258	15592550	NR_047614, NR_047615, NR_047632	CTGACTCAGGAATTGAGAGAAGAAATAATTTGAATTTTTTAATGAGTTCTTGGTGGCCCA	7404	exon sense-overlapping	NM_001258257	UTY	histone demethylase UTY isoform 12	-	15360258	15592550	23.6373	10.8799	4.47295	3.14286
ASHGA5P025966	2.51419	up	noncoding	NR_047623	UTY	RefSeq	5971	chrY	-	15360258	15592550	NR_047614, NR_047615, NR_047632	CTGACTCAGGAATTGAGAGAAGAAATAATTTGAATTTTTTAATGAGTTCTTGGTGGCCCA	7404	exon sense-overlapping	NM_001258258	UTY	histone demethylase UTY isoform 13	-	15360258	15592550	23.6373	10.8799	4.47295	3.14286
ASHGA5P025966	2.51419	up	noncoding	NR_047623	UTY	RefSeq	5971	chrY	-	15360258	15592550	NR_047614, NR_047615, NR_047632	CTGACTCAGGAATTGAGAGAAGAAATAATTTGAATTTTTTAATGAGTTCTTGGTGGCCCA	7404	exon sense-overlapping	NM_001258259	UTY	histone demethylase UTY isoform 14	-	15360258	15592550	23.6373	10.8799	4.47295	3.14286
ASHGA5P025966	2.51419	up	noncoding	NR_047623	UTY	RefSeq	5971	chrY	-	15360258	15592550	NR_047614, NR_047615, NR_047632	CTGACTCAGGAATTGAGAGAAGAAATAATTTGAATTTTTTAATGAGTTCTTGGTGGCCCA	7404	exon sense-overlapping	NM_001258260	UTY	histone demethylase UTY isoform 15	-	15360258	15592550	23.6373	10.8799	4.47295	3.14286
ASHGA5P025966	2.51419	up	noncoding	NR_047623	UTY	RefSeq	5971	chrY	-	15360258	15592550	NR_047614, NR_047615, NR_047632	CTGACTCAGGAATTGAGAGAAGAAATAATTTGAATTTTTTAATGAGTTCTTGGTGGCCCA	7404	exon sense-overlapping	NM_001258261	UTY	histone demethylase UTY isoform 16	-	15360258	15592550	23.6373	10.8799	4.47295	3.14286
ASHGA5P025966	2.51419	up	noncoding	NR_047623	UTY	RefSeq	5971	chrY	-	15360258	15592550	NR_047614, NR_047615, NR_047632	CTGACTCAGGAATTGAGAGAAGAAATAATTTGAATTTTTTAATGAGTTCTTGGTGGCCCA	7404	exon sense-overlapping	NM_001258262	UTY	histone demethylase UTY isoform 17	-	15360258	15592550	23.6373	10.8799	4.47295	3.14286
ASHGA5P025966	2.51419	up	noncoding	NR_047623	UTY	RefSeq	5971	chrY	-	15360258	15592550	NR_047614, NR_047615, NR_047632	CTGACTCAGGAATTGAGAGAAGAAATAATTTGAATTTTTTAATGAGTTCTTGGTGGCCCA	7404	exon sense-overlapping	NM_001258263	UTY	histone demethylase UTY isoform 18	-	15360258	15592550	23.6373	10.8799	4.47295	3.14286
ASHGA5P025966	2.51419	up	noncoding	NR_047623	UTY	RefSeq	5971	chrY	-	15360258	15592550	NR_047614, NR_047615, NR_047632	CTGACTCAGGAATTGAGAGAAGAAATAATTTGAATTTTTTAATGAGTTCTTGGTGGCCCA	7404	exon sense-overlapping	NM_001258264	UTY	histone demethylase UTY isoform 19	-	15360258	15592550	23.6373	10.8799	4.47295	3.14286
ASHGA5P025966	2.51419	up	noncoding	NR_047623	UTY	RefSeq	5971	chrY	-	15360258	15592550	NR_047614, NR_047615, NR_047632	CTGACTCAGGAATTGAGAGAAGAAATAATTTGAATTTTTTAATGAGTTCTTGGTGGCCCA	7404	exon sense-overlapping	NM_001258265	UTY	histone demethylase UTY isoform 20	-	15360258	15592550	23.6373	10.8799	4.47295	3.14286
ASHGA5P025966	2.51419	up	noncoding	NR_047623	UTY	RefSeq	5971	chrY	-	15360258	15592550	NR_047614, NR_047615, NR_047632	CTGACTCAGGAATTGAGAGAAGAAATAATTTGAATTTTTTAATGAGTTCTTGGTGGCCCA	7404	exon sense-overlapping	NM_001258266	UTY	histone demethylase UTY isoform 21	-	15360258	15592550	23.6373	10.8799	4.47295	3.14286
ASHGA5P025966	2.51419	up	noncoding	NR_047623	UTY	RefSeq	5971	chrY	-	15360258	15592550	NR_047614, NR_047615, NR_047632	CTGACTCAGGAATTGAGAGAAGAAATAATTTGAATTTTTTAATGAGTTCTTGGTGGCCCA	7404	exon sense-overlapping	NM_001258267	UTY	histone demethylase UTY isoform 22	-	15360258	15592550	23.6373	10.8799	4.47295	3.14286
ASHGA5P025966	2.51419	up	noncoding	NR_047623	UTY	RefSeq	5971	chrY	-	15360258	15592550	NR_047614, NR_047615, NR_047632	CTGACTCAGGAATTGAGAGAAGAAATAATTTGAATTTTTTAATGAGTTCTTGGTGGCCCA	7404	exon sense-overlapping	NM_001258268	UTY	histone demethylase UTY isoform 23	-	15360258	15592550	23.6373	10.8799	4.47295	3.14286
ASHGA5P025966	2.51419	up	noncoding	NR_047623	UTY	RefSeq	5971	chrY	-	15360258	15592550	NR_047614, NR_047615, NR_047632	CTGACTCAGGAATTGAGAGAAGAAATAATTTGAATTTTTTAATGAGTTCTTGGTGGCCCA	7404	exon sense-overlapping	NM_001258269	UTY	histone demethylase UTY isoform 24	-	15360258	15592550	23.6373	10.8799	4.47295	3.14286
ASHGA5P025966	2.51419	up	noncoding	NR_047623	UTY	RefSeq	5971	chrY	-	15360258	15592550	NR_047614, NR_047615, NR_047632	CTGACTCAGGAATTGAGAGAAGAAATAATTTGAATTTTTTAATGAGTTCTTGGTGGCCCA	7404	exon sense-overlapping	NM_001258270	UTY	histone demethylase UTY isoform 25	-	15360258	15592550	23.6373	10.8799	4.47295	3.14286
ASHGA5P025966	2.51419	up	noncoding	NR_047623	UTY	RefSeq	5971	chrY	-	15360258	15592550	NR_047614, NR_047615, NR_047632	CTGACTCAGGAATTGAGAGAAGAAATAATTTGAATTTTTTAATGAGTTCTTGGTGGCCCA	7404	exon sense-overlapping	NM_007125	UTY	histone demethylase UTY isoform 3	-	15360258	15592550	23.6373	10.8799	4.47295	3.14286
ASHGA5P025966	2.51419	up	noncoding	NR_047623	UTY	RefSeq	5971	chrY	-	15360258	15592550	NR_047614, NR_047615, NR_047632	CTGACTCAGGAATTGAGAGAAGAAATAATTTGAATTTTTTAATGAGTTCTTGGTGGCCCA	7404	exon sense-overlapping	NM_182659	UTY	histone demethylase UTY isoform 2	-	15409388	15592550	23.6373	10.8799	4.47295	3.14286
ASHGA5P025966	2.51419	up	noncoding	NR_047623	UTY	RefSeq	5971	chrY	-	15360258	15592550	NR_047614, NR_047615, NR_047632	CTGACTCAGGAATTGAGAGAAGAAATAATTTGAATTTTTTAATGAGTTCTTGGTGGCCCA	7404	exon sense-overlapping	NM_182660	UTY	histone demethylase UTY isoform 1	-	15434913	15592550	23.6373	10.8799	4.47295	3.14286
ASHGA5P058730	1.29104	up	noncoding	uc.469-	uc.469	UCR	222	chrX	-	25018052	25018274		AATCCACTAACACGTTCATTTTATCTCTGCACAAAACCTCTAGTCTGCTTATAGAAAGCT		intergenic							100.687	74.2291	6.61306	6.24453
ASHGA5P040111	1.18927	up	noncoding	ENST00000509834	RP11-420A23.1	GENCODE	743	chr4	+	129214087	129396151		AGGAGACAAATCTCCTAGAAGCCAAGAAGATGGTGGTAAACTAATAAGTGATGAGAGCAG		intergenic							40.7753	34.8435	5.26874	5.01867
ASHGA5P027772	4.37567	up	noncoding	ENST00000455771	RP11-347K2.2	GENCODE	439	chr1	-	103820968	103835986	ENST00000444810	CATGATGTCCAGTAATTTTTACTGGGGATAATACCTGCAATATACATAAGATGGTGTCAT		intergenic							79.3904	20.3326	6.26034	4.13083
ASHGA5P048295	1.13214	up	noncoding	ENST00000508969	CTD-2313N18.5	GENCODE	2165	chr11	-	71521346	71524905		GGGGTTGCTGTGGTATTTATGTTTTAAGGTTGTCTTTTAATCATCTTCAGCAAATTCAAC		intergenic							71.4921	60.9608	6.10167	5.92262
ASHGA5P056464	1.65591	up	noncoding	TCONS_00004467	XLOC_002344	LincRNAs identified by Cabili et al	290	chr2	-	145281134	145282207		AAGTTTTCTGGCTCAACTCCGAATGGATTGGATTGCGAGTCTGCACGTGAGAAAACCGTT		intergenic							29.7304	19.6298	4.79748	4.06986
ASHGA5P032692	1.40252	up	noncoding	ENST00000573602	CTD-2561B21.5	GENCODE	2091	chr17	-	78942019	78944878		TGAGCGGCACCAGTGGGGTTTGTCATGCTGACACTGATGACAGAGGTGAACTCATGGTCC		intergenic							13.1271	10.5234	3.58816	3.10013
ASHGA5P030086	1.26224	up	noncoding	ENST00000561241	RP11-244F12.3	GENCODE	3354	chr15	-	63338232	63341586		AATGAAATGTCCTAATCCCAAAGGTAATACGATTCCACCTCAGGAAGCTGACTTCTCCCT		intronic antisense	NM_000366	TPM1	tropomyosin alpha-1 chain isoform 5	+	63334837	63358292	125.003	93.5245	6.94312	6.60713
ASHGA5P030086	1.26224	up	noncoding	ENST00000561241	RP11-244F12.3	GENCODE	3354	chr15	-	63338232	63341586		AATGAAATGTCCTAATCCCAAAGGTAATACGATTCCACCTCAGGAAGCTGACTTCTCCCT		intronic antisense	NM_001018004	TPM1	tropomyosin alpha-1 chain isoform 3	+	63334837	63364113	125.003	93.5245	6.94312	6.60713
ASHGA5P030086	1.26224	up	noncoding	ENST00000561241	RP11-244F12.3	GENCODE	3354	chr15	-	63338232	63341586		AATGAAATGTCCTAATCCCAAAGGTAATACGATTCCACCTCAGGAAGCTGACTTCTCCCT		intronic antisense	NM_001018005	TPM1	tropomyosin alpha-1 chain isoform 1	+	63334837	63358292	125.003	93.5245	6.94312	6.60713
ASHGA5P030086	1.26224	up	noncoding	ENST00000561241	RP11-244F12.3	GENCODE	3354	chr15	-	63338232	63341586		AATGAAATGTCCTAATCCCAAAGGTAATACGATTCCACCTCAGGAAGCTGACTTCTCCCT		intronic antisense	NM_001018006	TPM1	tropomyosin alpha-1 chain isoform 4	+	63334837	63364113	125.003	93.5245	6.94312	6.60713
ASHGA5P030086	1.26224	up	noncoding	ENST00000561241	RP11-244F12.3	GENCODE	3354	chr15	-	63338232	63341586		AATGAAATGTCCTAATCCCAAAGGTAATACGATTCCACCTCAGGAAGCTGACTTCTCCCT		intronic antisense	NM_001018007	TPM1	tropomyosin alpha-1 chain isoform 2	+	63334837	63364113	125.003	93.5245	6.94312	6.60713
ASHGA5P030086	1.26224	up	noncoding	ENST00000561241	RP11-244F12.3	GENCODE	3354	chr15	-	63338232	63341586		AATGAAATGTCCTAATCCCAAAGGTAATACGATTCCACCTCAGGAAGCTGACTTCTCCCT		intronic antisense	NM_001018020	TPM1	tropomyosin alpha-1 chain isoform 7	+	63334837	63364113	125.003	93.5245	6.94312	6.60713
ASHGA5P030086	1.26224	up	noncoding	ENST00000561241	RP11-244F12.3	GENCODE	3354	chr15	-	63338232	63341586		AATGAAATGTCCTAATCCCAAAGGTAATACGATTCCACCTCAGGAAGCTGACTTCTCCCT		natural antisense	NM_001018008	TPM1	tropomyosin alpha-1 chain isoform 6	+	63340635	63362831	125.003	93.5245	6.94312	6.60713
ASHGA5P050144	1.19842	up	noncoding	TCONS_00018839	XLOC_008644	LincRNAs identified by Cabili et al	623	chr10	+	122583858	122584805		ATTTTACTTCTTGCTGTTTGTGTTTATTTCCCCAGAGACAGAGCACTACGGAAGGGAGCC		intergenic							156.229	119.878	7.26935	7.00822
ASHGA5P033880	1.26444	up	noncoding	ENST00000579862	RP11-775G23.1	GENCODE	852	chr18	+	63273325	63319289		TCAGAAGTCTCCCCACTGTGGATGGGAGACAGAAAAGAAAGAAAGAGCCTGAATTACTGA		intergenic							1097.52	723.875	10.0938	9.75527
ASHGA5P032846	2.83603	up	noncoding	ENST00000433058	RP11-496N12.6	GENCODE	656	chr1	-	225635692	225652985		ATCCCGAAGATATGTGTTTGGCCAATAAAACACTGAATAAAAATCCATCATGTTTCCAGA		intergenic							107.924	39.5591	6.7225	5.21863
ASHGA5P050598	1.71283	up	noncoding	ENST00000452037	AC104655.3	GENCODE	515	chr2	+	105760580	105761370		CTCTGGGCAGAGGCCACGCGGGGACGGAGGAGGCAGAGAGGACGGGCTGTGATGGAGAAA		intergenic							105.797	60.6576	6.68866	5.91228
ASHGA5P032370	1.23331	up	noncoding	ENST00000582649	AC124789.1	GENCODE	643	chr17	-	36607404	36608147	ENST00000581922	GGGAGAGTGCACACAGTGGGGCCTCAAAGGTTATGTAGCTTGAATAAATGATCCTCCAGG		intronic antisense	NM_001199417	ARHGAP23	rho GTPase-activating protein 23	+	36584719	36668628	53.7962	43.8545	5.68371	5.38117
ASHGA5P031242	1.18035	up	noncoding	ENST00000436974	RP3-395P12.2	GENCODE	690	chr1	-	173143438	173144642		GATTGTTTTGAGGATTAAACAAAACACCAACCACGGGTCACAGATTATGACATTTTCAAG		intergenic							48.7691	41.4977	5.53436	5.29515
ASHGA5P017750	1.26846	up	noncoding	ENST00000445382	AC017099.3	GENCODE	537	chr2	+	98292283	98319224		GCTAAACCAGATCTCCTCTGGCAAACACGACATATAATATTTTTATAATGGATGGAAAGA		intergenic							515.932	347.456	8.99358	8.65051
ASHGA5P038416	1.83401	up	noncoding	ENST00000425820	RP4-694A7.2	GENCODE	960	chr1	+	68944811	68949222		GATTGAGCCAGAATACATTTAAAAAATCTGTTCTCAGTCTGCAAGTACTAGAAACCTCAT		natural antisense	NM_001114120	DEPDC1	DEP domain-containing protein 1A isoform a	-	68939834	68962799	93.7885	51.4497	6.50814	5.63314
ASHGA5P038416	1.83401	up	noncoding	ENST00000425820	RP4-694A7.2	GENCODE	960	chr1	+	68944811	68949222		GATTGAGCCAGAATACATTTAAAAAATCTGTTCTCAGTCTGCAAGTACTAGAAACCTCAT		natural antisense	NM_017779	DEPDC1	DEP domain-containing protein 1A isoform b	-	68939834	68962799	93.7885	51.4497	6.50814	5.63314
ASHGA5P040687	1.11136	up	noncoding	TCONS_00022099	XLOC_010709	LincRNAs identified by Cabili et al	1083	chr13	-	100738208	100741196		ATTGTAAGGAAAATACCCCCAAGGAAGTTGAGGACACAGCAGACTTGGACTGTCTCCAAA		intergenic							154.778	127.368	7.2566	7.10428
ASHGA5P057162	1.33405	up	noncoding	TCONS_00013887	XLOC_006525	LincRNAs identified by Cabili et al	360	chr7	-	93891325	93996572		ATGGAGGCTGACGATGGAAAATAAAAACAACAAGCAAGTGAAACTCCCTGACTTATCAAC		intergenic							120.638	86.0008	6.89228	6.47647
ASHGA5P048575	1.597	up	noncoding	ENST00000526079	GOLGA8E	GENCODE	5240	chr15	+	23435095	23448420	ENST00000314246, NR_027407, NR_027411, NR_033351, NR_033353	CCAAGAAGAAGGAGATAAACATGACCATCGTCAAAGACCTGCTCAAGAAATTTTTAAAAA	390535	intergenic							76.2481	47.9841	6.19763	5.52226
ASHGA5P027998	1.5948	up	noncoding	TCONS_00010006	XLOC_004443	LincRNAs identified by Cabili et al	523	chr5	+	81190737	81196638		CCATGGAATTAGGAATTCCCATCCTCAGTTTCTTCTTGGAGGTACAGAGCAGTAGCATTC		intergenic							91.1574	56.5172	6.46696	5.79359
ASHGA5P014291	1.0097	up	noncoding	NR_023919	LINC00339	RefSeq	1039	chr1	+	22352041	22357715	ENST00000404210	AGCTGCGTAGAAGTCTGGAACGTTTTTTCTTAGAGTTCCAGAATTGAGACTGAAGTGTAC	29092	intergenic							5.49962	5	2.43948	2.42556
ASHGA5P019422	1.20368	up	noncoding	NR_027126	RBM18	RefSeq	3172	chr9	-	125001833	125027143		GCAACCTGGACCCCAAAATTACCGATGTTCCGATAATTTTAAGAAATTATCAAACAAGAA	92400	exon sense-overlapping	NM_033117	RBM18	probable RNA-binding protein 18	-	125001833	125027143	202.531	152.092	7.65493	7.38748
ASHGA5P019422	1.20368	up	noncoding	NR_027126	RBM18	RefSeq	3172	chr9	-	125001833	125027143		GCAACCTGGACCCCAAAATTACCGATGTTCCGATAATTTTAAGAAATTATCAAACAAGAA	92400	natural antisense	NM_001173512	MRRF	ribosome-recycling factor, mitochondrial isoform 3	+	125026881	125085742	202.531	152.092	7.65493	7.38748
ASHGA5P019422	1.20368	up	noncoding	NR_027126	RBM18	RefSeq	3172	chr9	-	125001833	125027143		GCAACCTGGACCCCAAAATTACCGATGTTCCGATAATTTTAAGAAATTATCAAACAAGAA	92400	natural antisense	NM_138777	MRRF	ribosome-recycling factor, mitochondrial isoform 1 precursor	+	125026881	125085742	202.531	152.092	7.65493	7.38748
ASHGA5P020323	1.73265	up	noncoding	ENST00000511565	RP11-1334A24.4	GENCODE	502	chr5	-	176870067	176871478		GAGCTTTAAGGTGAATGTCCACTTCGAGGCCGGCTCAACCACCGTCTTCAGAGAACTCTC		intergenic							279.741	147.29	8.12793	7.33495
ASHGA5P018202	1.47897	up	noncoding	ENST00000450581	RP11-14C22.3	GENCODE	486	chr10	+	30944417	30946464		GGGAAGGAGTTTCTATTTCAACAATAAAAACTTAAGCTTCATTGGATTCCCATGTCAAAG		intergenic							307.151	185.297	8.26101	7.69642
ASHGA5P019843	1.4106	up	noncoding	ENST00000503987	RP11-584P21.2	GENCODE	763	chr4	-	68284259	68286772		CATCAGAAACGTCTCCATTTATTGAAGCTCAGATACCATTGCTTCAAGGTGCGAGCTGGT		intergenic							172.139	113.488	7.41164	6.91533
ASHGA5P048869	1.22927	up	noncoding	ENST00000558282	RP11-561C5.3	pseudogene	4853	chr15	+	85734668	85745240		ACCTGGTGAACTTCACTCAGGGAGAGGTAAGGGCCCCACTCTGCAGCCACCACTCAGATG									373.805	266.253	8.53913	8.24133
ASHGA5P033854	2.49798	up	noncoding	uc001icl.1	BC043220	UCSC_knowngene	755	chr1	-	247337903	247338870		CTCACATGATCTATTTGAGGTCTTGGAAAACAAGCTTGCCTTGTTAAAAATCAAAGGATG		intergenic							33.6107	15.2681	4.97834	3.65758
ASHGA5P026838	1.08927	up	noncoding	TCONS_00011851	XLOC_005338	LincRNAs identified by Cabili et al	813	chr6	+	68665335	68708615		AGTGGATCTTAGCAACATAAGAATCAACTATGGTAGTACCTGTGATGCCCCCTCCTGAAA		intergenic							1615.4	1211.5	10.6446	10.5212
ASHGA5P057003	3.02297	up	noncoding	TCONS_00011907	XLOC_005406	LincRNAs identified by Cabili et al	560	chr6	+	103982911	103988696		TATCTCTCAGTAGGACCCACGGGTCAAATAGCAAACTCAACCAACCAAGATATGAAAATG		intergenic							34.2783	13.2311	5.01031	3.41434
ASHGA5P058589	1.22723	up	noncoding	uc010nxr.1	DDX11L1	UCSC_knowngene	1595	chr1	+	11873	14409	uc010utw.1	ATCAACTTCTCTCACAACCTAGGCCACATCAGGTCTCCAGAGCTGCAGAAGACGACGGCC		intergenic							305.424	218.85	8.25242	7.95702
ASHGA5P017739	6.81031	up	noncoding	ENST00000445240	TAB3-AS2	GENCODE	292	chrX	+	30872437	30872824		CTGTGTATATTGAGTGTTGATTCCATGGAGATGGTTGATTACTGATGGGTGAAGGACTCC		natural antisense	NM_152787	TAB3	TGF-beta-activated kinase 1 and MAP3K7-binding protein 3	-	30845558	30907511	95.3993	16.3548	6.53617	3.76845
ASHGA5P017086	1.28431	up	noncoding	ENST00000437561	LINC00152	GENCODE	455	chr2	+	87769468	87820932	ENST00000442293	TTTTATTTGGAATAACTGGGAGATGAAACAGGAAGCTCTATGACACACTTGATCGAATAT	112597	intergenic							10675.6	6950.79	13.3715	13.0105
ASHGA5P043597	1.14006	up	noncoding	TCONS_00018338	XLOC_008619	LincRNAs identified by Cabili et al	1418	chr10	+	114665491	114704954		GCAATGACTATTGGGAAGTCTCTGCCCTGTATATCAGGGTAGCACAAATAATTCAGCACA		intergenic							781.453	577.62	9.60341	9.4143
ASHGA5P021723	1.21034	up	noncoding	ENST00000539233	C11orf95	GENCODE	351	chr11	-	63531311	63533434	ENST00000433688, ENST00000445014	GGGCCTGGGGAGGAGGCTGAAGGAGTCCCTGCAGAACTGGTTCCGGGCCGAGTGTCTCAT		exon sense-overlapping	NM_001144936	C11orf95	uncharacterized protein C11orf95	-	63527363	63536113	241.365	177.87	7.91043	7.63502
ASHGA5P039524	1.13412	up	noncoding	TCONS_00022439	XLOC_010775	LincRNAs identified by Cabili et al	278	chr14	+	25719559	25721093		AGCTGATGTGCCCAAGAACTGAGCCCAAGTCTTAGCACAAGATCTCCATCCATCAAATAA		intergenic							107.104	89.0566	6.71014	6.52857
ASHGA5P029604	1.2632	up	noncoding	ENST00000561909	CTD-2302E22.4	GENCODE	1096	chr14	+	64010286	64011382		AGCCTAGTTTTTTCCCTCAGCATTATATCATCTTTTCGATACGGTTAGGGAATAGAGCTA		bidirectional	NM_006246	PPP2R5E	serine/threonine-protein phosphatase 2A 56 kDa regulatory subunit epsilon isoform	-	63841354	64010079	138.027	102.4	7.08859	6.7515
ASHGA5P039775	1.61771	up	noncoding	AA151944		LincRNAs identified by Khalil et al	518	chr13	+	20180452	20180928		ACCTGAGGCTGGGCAAGGGGAATAGGCAACTGAGCAATTGGTATCATTTCCCATTTTAAA		intergenic							147.832	87.2842	7.19334	6.49939
ASHGA5P043161	1.54814	up	noncoding	TCONS_00019772	XLOC_009564	LincRNAs identified by Cabili et al	242	chr11	-	115937844	115943894		AACCTGTACTTCTACAGCCACCAGCCTGCAGGCTGGACCCCATTAGAGTGAGGAACGGAA		intergenic							18.9507	14.0356	4.14384	3.5133
ASHGA5P032079	3.69425	up	noncoding	ENST00000573007	RP1-59D14.5	GENCODE	442	chr17	-	2280092	2281040		ATAGGATTTTCTGGGTGTCTGATGTCATCAGCAACCCCTACTGTTCGCCAGAACTTTCAT		natural antisense	NM_001098509	SGSM2	small G protein signaling modulator 2 isoform 2	+	2240807	2284348	31.3934	9.65143	4.87441	2.98912
ASHGA5P032079	3.69425	up	noncoding	ENST00000573007	RP1-59D14.5	GENCODE	442	chr17	-	2280092	2281040		ATAGGATTTTCTGGGTGTCTGATGTCATCAGCAACCCCTACTGTTCGCCAGAACTTTCAT		natural antisense	NM_014853	SGSM2	small G protein signaling modulator 2 isoform 1	+	2240805	2284348	31.3934	9.65143	4.87441	2.98912
ASHGA5P038730	1.6408	up	noncoding	uc001djh.1	BC037304	UCSC_knowngene	2715	chr1	+	84543635	84546350		CATTTGGAGCAGTGTTATCAGGTATATGTTGCTGTTCTGTAGTGAACAAAGAAATTGTAT		exon sense-overlapping	NM_002731	PRKACB	cAMP-dependent protein kinase catalytic subunit beta isoform 2	+	84543744	84704181	16.055	11.1734	3.88727	3.17286
ASHGA5P038730	1.6408	up	noncoding	uc001djh.1	BC037304	UCSC_knowngene	2715	chr1	+	84543635	84546350		CATTTGGAGCAGTGTTATCAGGTATATGTTGCTGTTCTGTAGTGAACAAAGAAATTGTAT		exon sense-overlapping	NM_207578	PRKACB	cAMP-dependent protein kinase catalytic subunit beta isoform 3	+	84543744	84670979	16.055	11.1734	3.88727	3.17286
ASHGA5P027363	1.25285	up	noncoding	ENST00000418525	RP11-169K16.4	GENCODE	639	chr1	-	16066545	16076391		TTCAAAGGGTGCTGCTGGAGCTGTCCAAGGGGTGGCCATTCTTCGGGGAATGAGCTGAAA		intronic antisense	NM_001013641	TMEM82	transmembrane protein 82	+	16068916	16074477	528.699	358.987	9.02808	8.70287
ASHGA5P027363	1.25285	up	noncoding	ENST00000418525	RP11-169K16.4	GENCODE	639	chr1	-	16066545	16076391		TTCAAAGGGTGCTGCTGGAGCTGTCCAAGGGGTGGCCATTCTTCGGGGAATGAGCTGAAA		natural antisense	NM_207348	SLC25A34	solute carrier family 25 member 34	+	16062808	16067884	528.699	358.987	9.02808	8.70287
ASHGA5P018652	1.27268	up	noncoding	ENST00000456091	RP11-142G7.2	GENCODE	476	chrX	+	13354499	13391753		ACTCTACCAGTTTGGAACATCTGTTATTGCTGCTACTACGGTTTCTATCACTGTTTGATG		intergenic							37.4959	30.4498	5.14047	4.79261
ASHGA5P033741	3.8343	up	noncoding	ENST00000584109	RP11-881L2.1	GENCODE	534	chr18	+	9587383	9590180		CAGTAACAAGTCATTGTATCGGACCTAACTAGAACTCTGATACCCATTATTATTATGCAT		intronic antisense	NM_001042388	PPP4R1	serine/threonine-protein phosphatase 4 regulatory subunit 1 isoform a	-	9546788	9614605	179.258	48.3212	7.47149	5.53252
ASHGA5P033741	3.8343	up	noncoding	ENST00000584109	RP11-881L2.1	GENCODE	534	chr18	+	9587383	9590180		CAGTAACAAGTCATTGTATCGGACCTAACTAGAACTCTGATACCCATTATTATTATGCAT		intronic antisense	NM_005134	PPP4R1	serine/threonine-protein phosphatase 4 regulatory subunit 1 isoform b	-	9546788	9614605	179.258	48.3212	7.47149	5.53252
ASHGA5P023287	1.23162	up	noncoding	uc002kmp.3	LOC339290	UCSC_knowngene	3370	chr18	+	5240988	5246505		GTATTTTCAGATCCTTTGCACATGGCCTGCTATCAACAATCCTCTACAATGATTCTCAGC	339290	intergenic							139.737	106.372	7.10813	6.80758
ASHGA5P056430	1.08559	up	noncoding	TCONS_00004231	XLOC_002071	LincRNAs identified by Cabili et al	300	chr2	-	43401091	43411668		TTGAGACTCATCTATCTTCATATGTACATTTCCCACAGGACCAGAGCCGGCTTCTTCCAT		intron sense-overlapping	ENST00000330266	THADA	thyroid adenoma associated [Source:HGNC Symbol;Acc:19217]	-	43393799	43804327	34.8097	32.7263	5.03316	4.91468
ASHGA5P025537	1.53186	up	noncoding	NR_003313	SNORD115-21	RefSeq	81	chr15	+	25451408	25477615	ENST00000364809, NR_001291, NR_003294, NR_003295, NR_003296, NR_003297, NR_003298, NR_003299, NR_003300, NR_003302, NR_003303, NR_003305, NR_003306, NR_003307, NR_003308, NR_003309, NR_003312, NR_003314, NR_003342, NR_003343, NR_003345, NR_003346, NR_003350, NR_003354, NR_003355, NR_003356, NR_003359, NR_003495, NR_003496, NR_003497, uc001yzq.1	GTCGATGATGAGAACCTTATATTTTCTGAAGAGAGGTGATGACTTAAAAATCATGCTCAA	100033603	intergenic							2549.06	1362.92	11.3037	10.6885
ASHGA5P016210	1.58197	up	noncoding	uc001acl.1	BC033949	UCSC_knowngene	971	chr1	+	995116	1001833		CCTTTTGAAGGTGGTTTCACCCCAACATCAGCAGGGTGGAGGCGGAGAAGCTGTTCCTAT		intergenic							86.2175	54.0705	6.37723	5.71552
ASHGA5P057940	1.27284	up	noncoding	TCONS_00024073	XLOC_011433	LincRNAs identified by Cabili et al	550	chr15	-	39047294	39049571	TCONS_00023634	TCTAAAGAAAACTGCTTCCTGATGTTGGCGCAGTGCTGTGTTTAGTCATTCCTCCCAATG		intergenic							356.692	244.435	8.46516	8.11711
ASHGA5P028306	1.32011	up	noncoding	ENST00000477702	LINC00173	GENCODE	314	chr12	+	116973868	116974323	ENST00000470091	TGGAGACTCCTATTCACCCTTCAGATCAATATCCCCCAAATAAACTCCCAGTCACTCTGG	100287569	intergenic							505.233	328.633	8.96455	8.5639
ASHGA5P027557	1.15273	up	noncoding	ENST00000552154	RP11-554D14.7	GENCODE	452	chr12	-	108226634	108228807		TTCTGAGGTGGTAATGAATTCAAAACCCTTCTGTTCCTACTCTCATATTAAAGGTTCAAA		intergenic							450.552	334.956	8.79771	8.59266
ASHGA5P056942	1.48203	up	noncoding	TCONS_00010755	XLOC_004495	LincRNAs identified by Cabili et al	498	chr5	+	102001933	102058026		GTTTCAAAAGACATATTCCTTGAAGGTAGAATCACTGTCAGCAGAGTCCTTGCCAGGAAC		intergenic							70.4736	47.7388	6.08289	5.51531
ASHGA5P017968	1.13169	up	noncoding	ENST00000447773	AC007680.2	GENCODE	486	chr2	-	51429218	51448902		GCCTCCAGAGGCTGGTCTGCGATTTGCTTTGGCTGACAGAATATGATGAAGTGATGTTAT		intergenic							102.156	84.6929	6.6352	6.45672
ASHGA5P015696	1.37208	up	noncoding	ENST00000422703	MLK7-AS1	GENCODE	447	chr2	-	174031457	174136348		TGCCTGGGAGGTAAGGACCACAAGTCTCAGAAGAGTAGGAAGTGCCCAGCATCACACAGG	339751	intronic antisense	NM_016653	ZAK	mitogen-activated protein kinase kinase kinase MLT isoform 1	+	173940564	174132737	49.5955	36.7391	5.5602	5.10384
ASHGA5P015696	1.37208	up	noncoding	ENST00000422703	MLK7-AS1	GENCODE	447	chr2	-	174031457	174136348		TGCCTGGGAGGTAAGGACCACAAGTCTCAGAAGAGTAGGAAGTGCCCAGCATCACACAGG	339751	intronic antisense	NM_133646	ZAK	mitogen-activated protein kinase kinase kinase MLT isoform 2	+	173940564	174091873	49.5955	36.7391	5.5602	5.10384
ASHGA5P029976	1.26997	up	noncoding	uc021ska.1	AX748052	UCSC_knowngene	1187	chr15	-	43925928	43927115		AATACCTTCCATGAAACAGATATGATTCTAGACCCCAAGTGTTTAGCAGTGGACAAAAAA		intron sense-overlapping	NM_054020	CATSPER2	cation channel sperm-associated protein 2 isoform 1	-	43922771	43941039	57.4397	45.5187	5.7839	5.4391
ASHGA5P029976	1.26997	up	noncoding	uc021ska.1	AX748052	UCSC_knowngene	1187	chr15	-	43925928	43927115		AATACCTTCCATGAAACAGATATGATTCTAGACCCCAAGTGTTTAGCAGTGGACAAAAAA		intron sense-overlapping	NM_172095	CATSPER2	cation channel sperm-associated protein 2 isoform 2	-	43922771	43941039	57.4397	45.5187	5.7839	5.4391
ASHGA5P025796	1.03488	up	noncoding	NR_037937	SCNM1	RefSeq	1986	chr1	+	151138497	151142773		GGAAGTACAGAGGTCAAACTCCAAAGTGGGAAGATCAGTAGGGAACCTGAACCTGCGGCT	79005	exon sense-overlapping	NM_001204848	TNFAIP8L2-SCNM1	TNFAIP8L2-SCNM1 protein	+	151129104	151142773	4031.18	3175.65	11.9663	11.9168
ASHGA5P025796	1.03488	up	noncoding	NR_037937	SCNM1	RefSeq	1986	chr1	+	151138497	151142773		GGAAGTACAGAGGTCAAACTCCAAAGTGGGAAGATCAGTAGGGAACCTGAACCTGCGGCT	79005	exon sense-overlapping	NM_001204856	SCNM1	sodium channel modifier 1 isoform 2	+	151138497	151142773	4031.18	3175.65	11.9663	11.9168
ASHGA5P025796	1.03488	up	noncoding	NR_037937	SCNM1	RefSeq	1986	chr1	+	151138497	151142773		GGAAGTACAGAGGTCAAACTCCAAAGTGGGAAGATCAGTAGGGAACCTGAACCTGCGGCT	79005	exon sense-overlapping	NM_024041	SCNM1	sodium channel modifier 1 isoform 1	+	151138497	151142773	4031.18	3175.65	11.9663	11.9168
ASHGA5P025796	1.03488	up	noncoding	NR_037937	SCNM1	RefSeq	1986	chr1	+	151138497	151142773		GGAAGTACAGAGGTCAAACTCCAAAGTGGGAAGATCAGTAGGGAACCTGAACCTGCGGCT	79005	natural antisense	NM_013353	TMOD4	tropomodulin-4	-	151142462	151148547	4031.18	3175.65	11.9663	11.9168
ASHGA5P049564	1.32504	up	noncoding	ENST00000457924	UPF3AP2	pseudogene	1132	chr17	-	20279021	20280153	NM_023011, NM_080687	CCCCAGGAGACGTCACACAGCGGCAGTGATAAAGAGCACAGGGATGTGGAGAGATCTCAA									64.2473	48.5393	5.9475	5.54146
ASHGA5P001534	1.7054	up	noncoding	ENST00000235290	DLEU2	GENCODE	1294	chr13	-	50618049	50656127		GACCTCTACTTAGCTCAGCAATTCTTACCTTTCATTTCATGTTTTTCCCTTGATGTGAAG		bidirectional	ENST00000378180	DLEU1	deleted in lymphocytic leukemia 1 (non-protein coding) [Source:HGNC Symbol;Acc:13747]	+	50656306	50679433	1506.79	730.797	10.5392	9.76911
ASHGA5P051746	1.28616	up	noncoding	uc001esk.4	LOC728855	UCSC_knowngene	1270	chr1	+	149576452	149616786	ENST00000416869, ENST00000417976, ENST00000422124, ENST00000431928, ENST00000434159, ENST00000452795, ENST00000457645, NR_024511, NR_024584, TCONS_00000848, uc001azs.1, uc001eky.4, uc001ela.4, uc001esl.4	TGAAATCCTTGGAGTAGATCATCATGACCCTCTGTGTTCCTTTTGGCAAATGACTTGCTT	728855	intergenic							12068.3	7824.76	13.5348	13.1718
ASHGA5P042750	1.16595	up	noncoding	ENST00000438217	XX-C2158C12.2	GENCODE	758	chr6	+	171034284	171037576		CAATTTGGAAGAAAACATTTCCATCTGTTAATAAAGAGCAAGGGCCTCTGGTCATAAGTG		intergenic							315.379	237.617	8.29733	8.07582
ASHGA5P042617	1.11193	up	noncoding	TCONS_00019385	XLOC_009208	LincRNAs identified by Cabili et al	1404	chr11	+	72964637	72970234		ATCTGTTACTATTTTTCCAGTCTGCGAATTGCCAGAAGCCCAGTCTGCGAATTGCCAGAA		intergenic							46.589	41.9487	5.46524	5.31218
ASHGA5P027678	1.21955	up	noncoding	ENST00000537478	RP11-407A16.3	GENCODE	654	chr12	-	127148224	127174814		ACTGGCATATATCACCAGGACCACCTCCAAGTAATTGACTAATAAATAAAAGCTCTATTA		intergenic							163.342	123.038	7.33418	7.04784
ASHGA5P021448	1.53141	up	noncoding	ENST00000532579	RP11-677M14.3	GENCODE	678	chr11	+	124632326	124635257		GAGGGGTGAGACTGTTCTGGCCAAAGAGACTGGAGATCCAGTATCAGCAAGCTACTTTCT		bidirectional	NM_138961	ESAM	endothelial cell-selective adhesion molecule precursor	-	124623018	124632223	348.733	200.796	8.43652	7.82166
ASHGA5P033709	1.53791	up	noncoding	ENST00000573177	RP11-874J12.1	GENCODE	1388	chr18	+	3602997	3604385		AGTTTTAGCAAAAGCAGCAACAAATGTACTTTAAATACTAGCACAGTAAGGGAATTCCTG		intronic antisense	NM_001003809	DLGAP1	disks large-associated protein 1 isoform 2	-	3496029	3845358	15.2395	11.2878	3.8094	3.18842
ASHGA5P033709	1.53791	up	noncoding	ENST00000573177	RP11-874J12.1	GENCODE	1388	chr18	+	3602997	3604385		AGTTTTAGCAAAAGCAGCAACAAATGTACTTTAAATACTAGCACAGTAAGGGAATTCCTG		intronic antisense	NM_001242761	DLGAP1	disks large-associated protein 1 isoform 3	-	3502142	4455266	15.2395	11.2878	3.8094	3.18842
ASHGA5P033709	1.53791	up	noncoding	ENST00000573177	RP11-874J12.1	GENCODE	1388	chr18	+	3602997	3604385		AGTTTTAGCAAAAGCAGCAACAAATGTACTTTAAATACTAGCACAGTAAGGGAATTCCTG		intronic antisense	NM_001242762	DLGAP1	disks large-associated protein 1 isoform 4	-	3496029	3874767	15.2395	11.2878	3.8094	3.18842
ASHGA5P033709	1.53791	up	noncoding	ENST00000573177	RP11-874J12.1	GENCODE	1388	chr18	+	3602997	3604385		AGTTTTAGCAAAAGCAGCAACAAATGTACTTTAAATACTAGCACAGTAAGGGAATTCCTG		intronic antisense	NM_001242763	DLGAP1	disks large-associated protein 1 isoform 5	-	3496029	3874767	15.2395	11.2878	3.8094	3.18842
ASHGA5P033709	1.53791	up	noncoding	ENST00000573177	RP11-874J12.1	GENCODE	1388	chr18	+	3602997	3604385		AGTTTTAGCAAAAGCAGCAACAAATGTACTTTAAATACTAGCACAGTAAGGGAATTCCTG		intronic antisense	NM_001242764	DLGAP1	disks large-associated protein 1 isoform 6	-	3496029	3874253	15.2395	11.2878	3.8094	3.18842
ASHGA5P033709	1.53791	up	noncoding	ENST00000573177	RP11-874J12.1	GENCODE	1388	chr18	+	3602997	3604385		AGTTTTAGCAAAAGCAGCAACAAATGTACTTTAAATACTAGCACAGTAAGGGAATTCCTG		intronic antisense	NM_001242765	DLGAP1	disks large-associated protein 1 isoform 7	-	3502142	3845358	15.2395	11.2878	3.8094	3.18842
ASHGA5P033709	1.53791	up	noncoding	ENST00000573177	RP11-874J12.1	GENCODE	1388	chr18	+	3602997	3604385		AGTTTTAGCAAAAGCAGCAACAAATGTACTTTAAATACTAGCACAGTAAGGGAATTCCTG		intronic antisense	NM_001242766	DLGAP1	disks large-associated protein 1 isoform 8	-	3496029	3845358	15.2395	11.2878	3.8094	3.18842
ASHGA5P033709	1.53791	up	noncoding	ENST00000573177	RP11-874J12.1	GENCODE	1388	chr18	+	3602997	3604385		AGTTTTAGCAAAAGCAGCAACAAATGTACTTTAAATACTAGCACAGTAAGGGAATTCCTG		intronic antisense	NM_004746	DLGAP1	disks large-associated protein 1 isoform 1	-	3496029	4455266	15.2395	11.2878	3.8094	3.18842
ASHGA5P031482	1.14815	up	noncoding	ENST00000577140	LA16c-325D7.1	GENCODE	265	chr16	+	2907898	2909727		ACCTGGCGCAACCCGGGCTTGGGAATCCCGTTAACCCACTTCCCGAAAGCTGTGAATCAG		intronic antisense	NM_022119	PRSS22	brain-specific serine protease 4 precursor	-	2902727	2908171	389.656	293.152	8.59452	8.39521
ASHGA5P034200	1.09365	up	noncoding	ENST00000378432	CTC-425O23.2	GENCODE	1462	chr19	-	40779395	40781386		GGGGCGAGTGTAGGGAGTGTGTTTAAAAGAAAAAAGAAACAAAAAGTCTCTCTCTTTTTT		intron sense-overlapping	NM_001243027	AKT2	RAC-beta serine/threonine-protein kinase isoform 2	-	40736223	40791302	408.302	320.798	8.65919	8.53004
ASHGA5P034200	1.09365	up	noncoding	ENST00000378432	CTC-425O23.2	GENCODE	1462	chr19	-	40779395	40781386		GGGGCGAGTGTAGGGAGTGTGTTTAAAAGAAAAAAGAAACAAAAAGTCTCTCTCTTTTTT		intron sense-overlapping	NM_001243028	AKT2	RAC-beta serine/threonine-protein kinase isoform 2	-	40736223	40791302	408.302	320.798	8.65919	8.53004
ASHGA5P034200	1.09365	up	noncoding	ENST00000378432	CTC-425O23.2	GENCODE	1462	chr19	-	40779395	40781386		GGGGCGAGTGTAGGGAGTGTGTTTAAAAGAAAAAAGAAACAAAAAGTCTCTCTCTTTTTT		intron sense-overlapping	NM_001626	AKT2	RAC-beta serine/threonine-protein kinase isoform 1	-	40736223	40791302	408.302	320.798	8.65919	8.53004
ASHGA5P027282	1.73297	up	noncoding	TCONS_00011755	XLOC_005217	LincRNAs identified by Cabili et al	344	chr6	+	27012401	27026687		TCCTCAGCTCAAAGAGACAAGCTCTTGTCAGTTCCTGTAAAATTTAATGCTGGTGGGCCT		intergenic							61.9955	36.7554	5.89754	5.1043
ASHGA5P016414	1.54086	up	noncoding	ENST00000430181	TSPEAR-AS1	GENCODE	374	chr21	+	45930568	45935506		AGGAGCGCACATGGCTCCACGAGATGTGACTATTCCTATCTGCTGGAGAACAGCCGTCCA		intronic antisense	NM_144991	TSPEAR	protein TSPEAR precursor	-	45917774	46131495	302.933	176.369	8.24316	7.61942
ASHGA5P020835	1.32375	up	noncoding	ENST00000520554	RP3-399L15.3	GENCODE	568	chr6	+	114291117	114314627	ENST00000449620, ENST00000520891, uc003pwf.3	TGGCTAAAGTGAAGGAGTCTGTAGCTTTAGGGGAAGACAGAGCCACAAGATGGAAGGAGC		intronic antisense	NM_001527	HDAC2	histone deacetylase 2	-	114257319	114292359	67.9655	51.251	6.0307	5.62607
ASHGA5P043978	1.66484	up	noncoding	NR_033897	EPHA1-AS1	RefSeq	5034	chr7	+	143104905	143220540		CCATGTAAAATAATTTTACGGGTAGATTTTACCAACGTTTCAAGAGAGACATGATTCCCA	285965	intron sense-overlapping	NM_176883	TAS2R41	taste receptor type 2 member 41	+	143174965	143175889	109.46	64.1891	6.74497	6.00959
ASHGA5P043978	1.66484	up	noncoding	NR_033897	EPHA1-AS1	RefSeq	5034	chr7	+	143104905	143220540		CCATGTAAAATAATTTTACGGGTAGATTTTACCAACGTTTCAAGAGAGACATGATTCCCA	285965	intron sense-overlapping	NM_177437	TAS2R60	taste receptor type 2 member 60	+	143140545	143141502	109.46	64.1891	6.74497	6.00959
ASHGA5P043978	1.66484	up	noncoding	NR_033897	EPHA1-AS1	RefSeq	5034	chr7	+	143104905	143220540		CCATGTAAAATAATTTTACGGGTAGATTTTACCAACGTTTCAAGAGAGACATGATTCCCA	285965	intronic antisense	NM_005232	EPHA1	ephrin type-A receptor 1 precursor	-	143088204	143105985	109.46	64.1891	6.74497	6.00959
ASHGA5P036757	1.06705	up	noncoding	uc010zvh.1	FER1L4	UCSC_knowngene	2218	chr20	-	34188484	34193248		ACAAGGGCCCTAGAGATTGACCCTGCAGTGACTCCGCATGGACCCCTATACACTCACTTC	80307	intergenic							242.99	201.386	7.92105	7.82743
ASHGA5P047013	1.62897	up	noncoding	NR_038444	LOC728558	RefSeq	4262	chr10	-	97512962	97849992		GCACCCTCCTCAGCATCATGAAAATACTATGGTTAAGTATATATTATCACCAATTCATAC	728558	intronic antisense	NM_001001732	CC2D2B	protein CC2D2B isoform 2	+	97759847	97792441	1675.32	850.24	10.7014	9.99741
ASHGA5P047013	1.62897	up	noncoding	NR_038444	LOC728558	RefSeq	4262	chr10	-	97512962	97849992		GCACCCTCCTCAGCATCATGAAAATACTATGGTTAAGTATATATTATCACCAATTCATAC	728558	intronic antisense	NM_001130446	C10orf131	uncharacterized protein C10orf131	+	97667721	97698415	1675.32	850.24	10.7014	9.99741
ASHGA5P047013	1.62897	up	noncoding	NR_038444	LOC728558	RefSeq	4262	chr10	-	97512962	97849992		GCACCCTCCTCAGCATCATGAAAATACTATGGTTAAGTATATATTATCACCAATTCATAC	728558	intronic antisense	NM_001134375	CCNJ	cyclin-J isoform 1	+	97803158	97820625	1675.32	850.24	10.7014	9.99741
ASHGA5P047013	1.62897	up	noncoding	NR_038444	LOC728558	RefSeq	4262	chr10	-	97512962	97849992		GCACCCTCCTCAGCATCATGAAAATACTATGGTTAAGTATATATTATCACCAATTCATAC	728558	intronic antisense	NM_001134376	CCNJ	cyclin-J isoform 3	+	97803158	97820625	1675.32	850.24	10.7014	9.99741
ASHGA5P047013	1.62897	up	noncoding	NR_038444	LOC728558	RefSeq	4262	chr10	-	97512962	97849992		GCACCCTCCTCAGCATCATGAAAATACTATGGTTAAGTATATATTATCACCAATTCATAC	728558	intronic antisense	NM_001159747	CC2D2B	protein CC2D2B isoform 1	+	97759847	97792441	1675.32	850.24	10.7014	9.99741
ASHGA5P047013	1.62897	up	noncoding	NR_038444	LOC728558	RefSeq	4262	chr10	-	97512962	97849992		GCACCCTCCTCAGCATCATGAAAATACTATGGTTAAGTATATATTATCACCAATTCATAC	728558	intronic antisense	NM_019084	CCNJ	cyclin-J isoform 2	+	97803158	97820625	1675.32	850.24	10.7014	9.99741
ASHGA5P047013	1.62897	up	noncoding	NR_038444	LOC728558	RefSeq	4262	chr10	-	97512962	97849992		GCACCCTCCTCAGCATCATGAAAATACTATGGTTAAGTATATATTATCACCAATTCATAC	728558	natural antisense	NM_001098175	ENTPD1	ectonucleoside triphosphate diphosphohydrolase 1 isoform 2	+	97471535	97637023	1675.32	850.24	10.7014	9.99741
ASHGA5P047013	1.62897	up	noncoding	NR_038444	LOC728558	RefSeq	4262	chr10	-	97512962	97849992		GCACCCTCCTCAGCATCATGAAAATACTATGGTTAAGTATATATTATCACCAATTCATAC	728558	natural antisense	NM_001164178	ENTPD1	ectonucleoside triphosphate diphosphohydrolase 1 isoform 3	+	97515408	97637023	1675.32	850.24	10.7014	9.99741
ASHGA5P047013	1.62897	up	noncoding	NR_038444	LOC728558	RefSeq	4262	chr10	-	97512962	97849992		GCACCCTCCTCAGCATCATGAAAATACTATGGTTAAGTATATATTATCACCAATTCATAC	728558	natural antisense	NM_001164179	ENTPD1	ectonucleoside triphosphate diphosphohydrolase 1 isoform 4	+	97515672	97637023	1675.32	850.24	10.7014	9.99741
ASHGA5P047013	1.62897	up	noncoding	NR_038444	LOC728558	RefSeq	4262	chr10	-	97512962	97849992		GCACCCTCCTCAGCATCATGAAAATACTATGGTTAAGTATATATTATCACCAATTCATAC	728558	natural antisense	NM_001164181	ENTPD1	ectonucleoside triphosphate diphosphohydrolase 1 isoform 5	+	97515408	97637023	1675.32	850.24	10.7014	9.99741
ASHGA5P047013	1.62897	up	noncoding	NR_038444	LOC728558	RefSeq	4262	chr10	-	97512962	97849992		GCACCCTCCTCAGCATCATGAAAATACTATGGTTAAGTATATATTATCACCAATTCATAC	728558	natural antisense	NM_001164182	ENTPD1	ectonucleoside triphosphate diphosphohydrolase 1 isoform 6	+	97515672	97637023	1675.32	850.24	10.7014	9.99741
ASHGA5P047013	1.62897	up	noncoding	NR_038444	LOC728558	RefSeq	4262	chr10	-	97512962	97849992		GCACCCTCCTCAGCATCATGAAAATACTATGGTTAAGTATATATTATCACCAATTCATAC	728558	natural antisense	NM_001164183	ENTPD1	ectonucleoside triphosphate diphosphohydrolase 1 isoform 6	+	97515672	97637023	1675.32	850.24	10.7014	9.99741
ASHGA5P047013	1.62897	up	noncoding	NR_038444	LOC728558	RefSeq	4262	chr10	-	97512962	97849992		GCACCCTCCTCAGCATCATGAAAATACTATGGTTAAGTATATATTATCACCAATTCATAC	728558	natural antisense	NM_001776	ENTPD1	ectonucleoside triphosphate diphosphohydrolase 1 isoform 1	+	97515672	97637023	1675.32	850.24	10.7014	9.99741
ASHGA5P054161	3.41687	up	noncoding	ENST00000444489	RP13-507I23.1	GENCODE	2951	chrX	+	149108373	149185018	NR_027456	AATTCCAGAGGTAGAGCACTGCTGATTGGAGACATATTAAGTAAAATGTACTGTGGAAAT		intergenic							19.7006	5	4.19823	2.42556
ASHGA5P042845	1.09964	up	noncoding	TCONS_00019182	XLOC_009017	LincRNAs identified by Cabili et al	1343	chr11	+	356461	358128		AACTGAGTGAACTCCCACAATTTGAGCAACACCTCATTCTACATCCTAACCCAAAGTGTG		intergenic							88.5439	75.9702	6.41846	6.28143
ASHGA5P022327	2.6425	up	noncoding	ENST00000554687	CTD-2058B24.2	GENCODE	785	chr14	-	38503491	38663486		AGTTAAAGAGGAAACTATCACCCCCTAAGAGGAAGCCAATATCATTTGTCACAAGTTTAA		intergenic							247.593	89.9753	7.94749	6.54558
ASHGA5P019853	1.25982	up	noncoding	ENST00000504129	CTC-498J12.3	GENCODE	946	chr5	-	68408938	68432221		CCATCATACTTCCATGAAATTAGAAAAAAGTTACCTACATAGGCAGAGAATTCAACTGTG		natural antisense	NM_022902	SLC30A5	zinc transporter 5 isoform 1	+	68389775	68426899	31.4415	26.1107	4.87667	4.54345
ASHGA5P040245	1.4433	up	noncoding	ENST00000561655	RP11-475B2.1	GENCODE	885	chr4	+	174514822	174515707		CATGGAGGAGGCTAAAATAAAAGTGTTTGATAAATAATCCAGAGGATGGCTACTTAGTTC		intergenic							33.2891	24.3508	4.96213	4.43276
ASHGA5P039991	1.2244	up	noncoding	uc021xph.1	FW340024	UCSC_knowngene	5651	chr4	+	77953942	77959593		GCATTCACCATCACTGAATGCTGGTGCTGTCGCTCCTAATTTTCCTTTCTTTTTAATTTA		exon sense-overlapping	NM_018243	SEPT11	septin-11	+	77870894	77959768	590.117	409.044	9.19011	8.89803
ASHGA5P037215	1.0318	up	noncoding	ENST00000414582	AL109763.2	GENCODE	615	chr21	-	19984379	20125346	uc010glf.2	ATTTATGGTGAGGAGAAAAGCAGCTGGTATCACACTCTACCCAAGTCCCAAAAGCAGGTT		intergenic							140.99	125.203	7.12247	7.0773
ASHGA5P057924	1.08517	up	noncoding	TCONS_00023839	XLOC_011613	LincRNAs identified by Cabili et al	253	chr15	-	101630820	101649239		GGGTAGACAGGTCTGGAAGTTGCACAGAGCACAGGAGGGCTGACTTGCTTCCATCCTGTA		intergenic							40.2961	37.3966	5.24963	5.1317
ASHGA5P000546	1.24319	up	noncoding	chr9:110109500-110126925+	chr9:110109500-110126925	LincRNAs identified by Khalil et al	17425	chr9	+	111069679	111087104		GTCTGGGATAGTATAATTATTCAATTAATGCTTACGGAAAAAGAGGCGAAAGGGGGATGG		intergenic							34.0023	28.4576	4.99738	4.68333
ASHGA5P056780	1.03178	up	noncoding	TCONS_00008606	XLOC_004112	LincRNAs identified by Cabili et al	336	chr4	-	146502619	146509110		TCAAAAGGAGCTTAGGAACAAGCAGAGAGAAAATCCCACCTCAAAGGATCTGGAGAACTG		intergenic							45.629	44.1196	5.43442	5.38928
ASHGA5P036451	1.33559	up	noncoding	TCONS_00026355	XLOC_012708	LincRNAs identified by Cabili et al	566	chr18	+	67873173	67874285		AAGCAGTGTCTTTGGATACCCAAGTTCAGATATGAACAAGCAAGCTACAAAAGCGGGGTG		natural antisense	ENST00000255674	RTTN	rotatin [Source:HGNC Symbol;Acc:18654]	-	67671028	67873181	75.9709	55.8246	6.19142	5.77394
ASHGA5P038576	1.16097	up	noncoding	ENST00000457125	RP11-706D8.3	GENCODE	522	chr3	-	177055415	177066954		GGCCTAAAACATCTGCCCTCTTATAGCTGTTTTATTATTATGTAAACATGGCTACAAGAT		intergenic							624.595	453.046	9.26854	9.05321
ASHGA5P035176	1.6639	up	noncoding	uc002sxx.1	ANKRD36B	UCSC_knowngene	2830	chr2	-	98121260	98128515	ENST00000258459	TTTGTTTCCCGTTAAATGTGTGACATGCAAAAGTATTTATTAAATGAAAATATTTTTTAT	57730	exon sense-overlapping	NM_025190	ANKRD36B	ankyrin repeat domain-containing protein 36B	-	98121260	98206428	88.9382	53.2686	6.425	5.69042
ASHGA5P015290	1.34118	up	noncoding	ENST00000418874	AP006748.1	GENCODE	346	chr21	-	42948061	42953246		TGTCTCATCTGCACCTGGGCACGTGGTCATGTTGGATAACCCACGTGGCAGGAACTAAGG		intergenic							27.3093	21.8831	4.68094	4.25744
ASHGA5P041784	1.69109	up	noncoding	ENST00000429032	PPP1R2P1	pseudogene	618	chr6	-	32846992	32847610	NM_006241, NR_038443	GAAGAATCAAATCAAGGATCTACTGCAAGTGACCAACAGCAAAATAAATCACGAAGTTCA									3028.39	1479.19	11.5601	10.8021
ASHGA5P058856	1.3898	up	noncoding	uc.303+	uc.303	UCR	272	chr10	+	103052426	103052698		TCACTGACATTTATATTAGAGGATATTGATGGCAGGAGCTGTGACCGCATCACTCTGCCT		intergenic							31.9317	24.2295	4.89921	4.42433
ASHGA5P041195	1.15387	up	noncoding	TCONS_00020608	XLOC_009926	LincRNAs identified by Cabili et al	237	chr12	+	124572820	124574626		TTTGGATAATCCACCTCATGACTGGAAAACAACGAAGAAACCCAGTAGCTTCTTCGCCGT		intron sense-overlapping	NM_001204299	ZNF664-FAM101A	protein FAM101A	+	124457761	124800570	50.5836	44.021	5.59365	5.38718
ASHGA5P018263	1.03035	up	noncoding	ENST00000451381	RP5-905H7.3	GENCODE	351	chr7	-	62693492	62702023		TTGATAACAACAAGAATAAAGGGCAGCTGACTAAGTCTCCCGATTCCTGTTGGTGCAACC		intergenic							12133	9948	13.5414	13.4983
ASHGA5P029441	1.35106	up	noncoding	ENST00000320322	RP11-998D10.4	GENCODE	358	chr14	+	21576201	21584862		GACATAAGTCAGAACGCTGGAAGAAACTGGGTCCCAATATTATAATAATCAATAAAGACA		intergenic							70.5747	51.9745	6.08463	5.65054
ASHGA5P028629	1.0097	up	noncoding	ENST00000442478	RP11-51B13.1	GENCODE	353	chr13	-	91739507	91741847		GGATGACTTGCTGAGTTAATTTAAAGTGATGTAAATTGCTAAGACAACACTGCAAAGCAT		intergenic							5.49962	5	2.43948	2.42556
ASHGA5P043882	3.18336	up	noncoding	ENST00000415896	RP11-807H17.1	GENCODE	465	chr7	+	125078275	125101923		GTTCTTAAGTATGAGCCACAGCATTTATAACAACCCCAGAATGTACCATTTTTATACAAG		intergenic							101.833	33.6222	6.62925	4.9587
ASHGA5P022399	1.1919	up	noncoding	ENST00000556116	RP11-566K8.2	GENCODE	552	chr14	-	39308092	39417441	ENST00000557019	ATTAGCCCTGTGCCACACCCTACCTATGAGAAATCAGTGTTTACTGCAGAGAACACAGAA		intergenic							960.049	674.705	9.8974	9.64414
ASHGA5P038450	1.14425	up	noncoding	ENST00000477059	RP11-548O1.3	GENCODE	483	chr3	-	138659269	138661420		AAGCATGTTCTGGGATCTTGTCACTTCGCGGAGGTGGCCTGTGCAGCATGAGGCAAAGAC		intergenic							104.118	85.51	6.6629	6.4685
ASHGA5P015091	1.25542	up	noncoding	ENST00000542586	TP53TG1	GENCODE	219	chr7	-	86974512	86974802	uc003uip.4	CAGGCCGCGCTCCGCCCACGAAGGTCTGGCTTACCACACGCTCCTCCCCATTCCCAGTGA	11257	bidirectional	NM_001143935	CROT	peroxisomal carnitine O-octanoyltransferase isoform 1	+	86974950	87029112	125378	91018.7	16.8673	16.5392
ASHGA5P015091	1.25542	up	noncoding	ENST00000542586	TP53TG1	GENCODE	219	chr7	-	86974512	86974802	uc003uip.4	CAGGCCGCGCTCCGCCCACGAAGGTCTGGCTTACCACACGCTCCTCCCCATTCCCAGTGA	11257	bidirectional	NM_001243745	CROT	peroxisomal carnitine O-octanoyltransferase isoform 3	+	86974950	86989425	125378	91018.7	16.8673	16.5392
ASHGA5P015091	1.25542	up	noncoding	ENST00000542586	TP53TG1	GENCODE	219	chr7	-	86974512	86974802	uc003uip.4	CAGGCCGCGCTCCGCCCACGAAGGTCTGGCTTACCACACGCTCCTCCCCATTCCCAGTGA	11257	bidirectional	NM_021151	CROT	peroxisomal carnitine O-octanoyltransferase isoform 2	+	86974950	87029112	125378	91018.7	16.8673	16.5392
ASHGA5P026745	1.26084	up	noncoding	ENST00000526107	RP11-788M5.3	pseudogene	546	chr11	+	101079635	101080181	ENST00000531772	GAAGATGAAGATGATCTGGCCAAAAGAGAAGATGAGTTCATGGACCTAGGGGATATGTGA									80.7128	61.9204	6.28308	5.9487
ASHGA5P057325	1.20424	up	noncoding	TCONS_00016108	XLOC_007497	LincRNAs identified by Cabili et al	598	chr9	+	106761761	106790285		ATTGTCTAAGGTGATAACAGAGGAAATACCTGCCTGATGCTCTCAATGTCATCAGTTAAA		intergenic							356.393	257.531	8.46362	8.1955
ASHGA5P056535	1.51732	up	noncoding	TCONS_00005968	XLOC_002601	LincRNAs identified by Cabili et al	1025	chr3	+	25913583	26020527		TAGAGAAACTTTCTGTGGCTTAACTGGTCTCAGCTTGGCATCTCTCTTGTAGTTGAAGTC		natural antisense	ENST00000451284	AC103588.1	HCG1813935; Uncharacterized protein [Source:UniProtKB/TrEMBL;Acc:C9JLB4]	-	25900023	25915189	3895.31	2110.79	11.9134	11.3118
ASHGA5P053185	1.09036	up	noncoding	uc003ulo.1	AL133568	UCSC_knowngene	2158	chr7	+	91763905	91809228		GCGCGGGATAGGGCACCTGAGGAAGCGGGCTGCGCCTGTGGCACAGTGGTACGGGGCCGG		natural antisense	NM_001146152	CYP51A1	lanosterol 14-alpha demethylase isoform 2	-	91741462	91764059	177.043	146.864	7.45468	7.32988
ASHGA5P053185	1.09036	up	noncoding	uc003ulo.1	AL133568	UCSC_knowngene	2158	chr7	+	91763905	91809228		GCGCGGGATAGGGCACCTGAGGAAGCGGGCTGCGCCTGTGGCACAGTGGTACGGGGCCGG		natural antisense	NM_001161528	LRRD1	leucine-rich repeat and death domain-containing protein 1	-	91774197	91794590	177.043	146.864	7.45468	7.32988
ASHGA5P028013	1.169	up	noncoding	ENST00000548135	RP11-1020M18.10	GENCODE	629	chr12	+	52801363	52822278		TTCTGCTTCAATATTTTCAGCAACGGGAACTCCCTACTTGGATGCATCTTTGCAAGCCAG		natural antisense	NM_004693	KRT75	keratin, type II cytoskeletal 75	-	52817853	52828110	288.741	217.896	8.17412	7.94884
ASHGA5P031131	1.25344	up	noncoding	ENST00000567036	RP11-293B20.1	GENCODE	614	chr16	-	33489491	33490548	NM_014753	GGATTCTCTTACTTTCCTCTGCCTGCCTCAGTTTAATTATTTTGTCCTGCAAAAATACCA		intergenic							6167	4069.93	12.5787	12.2528
ASHGA5P019056	1.13025	up	noncoding	ENST00000491962	RP11-34P13.13	GENCODE	278	chr1	-	165888	168767	ENST00000417964, ENST00000428504, ENST00000433986, ENST00000446912, ENST00000447412, ENST00000466557, ENST00000568048, NR_029401, uc002fqr.2	AGAAAATATGACATGAACTTATGAATTCAACAGGTGAAGATTTACAACTTGATAAATCAA		intergenic							153.79	124.747	7.24775	7.0711
ASHGA5P051845	1.36268	up	noncoding	ENST00000435731	SDHAP1	GENCODE	548	chr3	-	195709163	195717176	ENST00000413474, ENST00000427415, ENST00000427841, ENST00000429897, ENST00000445430, ENST00000452844, ENST00000453324, ENST00000457233, NR_003265, uc011btp.1	GACTACAGACGTGTCGGGGGTCCGGGGCCTGTCGCGGTTGCCAAGCGCTCGGCGCCTGGC	255812	intergenic							737.32	457.576	9.51499	9.06854
ASHGA5P053758	1.03747	up	noncoding	ENST00000422343	RP11-180I4.2	GENCODE	403	chr9	+	98412435	98478000		GCCCCCTCCAACCAACCTTGATTGTGAAATGATGATGAAATAAACCTTCATTATGGTGTG		intergenic							5491.17	4315.28	12.3929	12.3398
ASHGA5P049169	1.22914	up	noncoding	TCONS_00023648	XLOC_011448	LincRNAs identified by Cabili et al	10347	chr15	-	41578206	41598741	TCONS_00024099	GGTTGCAGAGCCCCACAAACTCCAGTAGTATCACTTATTCTATTGTACAACCTTGCTAAT		intergenic							659.17	452.342	9.34862	9.05097
ASHGA5P015793	1.17864	up	noncoding	ENST00000423580	ANKRD62P1	GENCODE	875	chr22	-	17156905	17175538		CCGCTGGACCTGCCCCTATTTTGTTAACCTATCGAAAATCAAGAATGCAACAGCTGCATG		intergenic							1310.95	918.416	10.3436	10.1065
ASHGA5P035971	1.06648	up	noncoding	NR_038888	LOC284950	RefSeq	3108	chr2	+	86042252	86053911		CAAAAGACAAATGATTATCTCAGGAAAAGTTCCTGCCCCTCTAAACTCTGTGCTGGGCAG	284950	intergenic							6988.72	5417.37	12.7717	12.6789
ASHGA5P032264	1.31539	up	noncoding	ENST00000564549	RP11-209D14.2	GENCODE	1184	chr17	-	19911363	19912547		CGGGTGACAGCTGATTTCCTCATATTGAAGTAATGAGTCCTAGTTATAATAAATTCCTAA		bidirectional	NM_001243439	SPECC1	cytospin-B isoform 1	+	19912648	20218072	160.416	113.261	7.30745	6.91196
ASHGA5P058062	1.08972	up	noncoding	TCONS_00026069	XLOC_012467	LincRNAs identified by Cabili et al	727	chr17	-	38277005	38278105	TCONS_00025631	CGGGGTGAAGTCCCACGCGGGTATGGGAGAGAATGAAGTTCTTTGTCTCTAAGGGATTCA		intergenic							17.0605	17.2255	3.98014	3.85618
ASHGA5P014776	1.2271	up	noncoding	uc010cqz.3	AK310665	UCSC_knowngene	1234	chr17	+	20328041	20334521	ENST00000300896, ENST00000508093, NM_004505, NR_003190, uc002gty.3, uc010cqf.3	TGCAATTTCATGCCATTCAGGAATTCTGAGTGGGGGCCGTTACGTCACTTATGCGAAAAA		intergenic							266.36	192.859	8.05371	7.75846
ASHGA5P040726	1.29139	up	noncoding	ENST00000455105	RP11-763B22.4	GENCODE	314	chr1	+	148760503	148761583	ENST00000415104, ENST00000427732	GTGTTCCTTTAGGCAAAAGGACTTGCTTCCATTGTTTGTTCAATTGTTTGTGTTTGTTAA		intergenic							10367.1	6706.43	13.3268	12.9579
ASHGA5P034356	1.23644	up	noncoding	ENST00000456687	RP3-395M20.7	GENCODE	1497	chr1	+	2497848	2508811		TATTAGGGCGTTTCATTGATAAACGCACATTTGAGGTGGAGGGTGGCCAGTGTAGAATGT		intergenic							32.436	27.3522	4.92334	4.61716
ASHGA5P057306	1.01974	up	noncoding	TCONS_00016551	XLOC_007314	LincRNAs identified by Cabili et al	312	chr9	+	32738963	32743397	TCONS_00015943	TACGTCGCCTTATTAAGCCTTGGATAAAGAAGACCACTTCATGGTACCATCAGATGGAGG		intergenic							61.6627	58.8255	5.88906	5.86086
ASHGA5P038107	1.51813	up	noncoding	ENST00000414969	SLC6A1-AS1	GENCODE	584	chr3	-	11047783	11060910		TGAGAACTTCATTTTGTCAAGGCAATTTTCAATCTGATCCGCATCGACTGTGCACCTCCG	100874090	intronic antisense	NM_003042	SLC6A1	sodium- and chloride-dependent GABA transporter 1	+	11034419	11080935	14.4631	10.7742	3.73273	3.13044
ASHGA5P045247	1.07603	up	noncoding	uc004adp.4	LOC554249	UCSC_knowngene	1355	chr9	-	46686628	46688098	ENST00000446626, NR_015363, uc004acc.4, uc010mmq.1	CAGTGGAGGTTTTAAATACAGAGTATTCATGAGTTTAGCAATGTTATTCGCCTCTCATTA		intergenic							1113.69	856.631	10.1145	10.0087
ASHGA5P051755	1.18243	up	noncoding	ENST00000493473	RP11-10O22.2	GENCODE	568	chr3	-	162937703	163021103		TGGCCAATAGGTAATCAGAACTTCTCTGTTCAGCTAAAAGACAGAAAAAGAGCATATGAA		intergenic							12.0336	11.6753	3.47255	3.23079
ASHGA5P048938	1.70746	up	noncoding	TCONS_00025843	XLOC_012114	LincRNAs identified by Cabili et al	614	chr17	+	13523045	13530958		GCTATGGCCTCCGAAGAAAAATTGATACACAAATAAACTGGTCTTTTGCCTAGACTGTGT		intergenic							84.3931	49.4991	6.34315	5.5713
ASHGA5P018244	1.95454	up	noncoding	ENST00000451149	RP11-389O22.1	GENCODE	436	chr1	+	113576294	113589677		AAACCAAAAGGCAGAATCAGTGTTACATTTGTGGTCAGATGAGCTAACGACATCCTTCCT		intergenic							22.9349	13.6315	4.43037	3.46354
ASHGA5P021373	2.45199	up	noncoding	ENST00000531108	AP000442.1	GENCODE	440	chr11	+	59383901	59407015		ATGAGGAGGAAAAGAGAGGAAGTAACTGAGCGATAATATGCTGTATGAGCCTCCTGCTCT		natural antisense	NM_152716	PATL1	protein PAT1 homolog 1	-	59404191	59436511	77.1586	32.8725	6.21616	4.92221
ASHGA5P042616	1.0898	up	noncoding	ENST00000411489	RP1-86D1.4	GENCODE	339	chr6	+	128826269	128827421		TAAATCTGAGTGCTACTCCCAGATAGGACATAATACTTACTGGGATGGGCACTGCTTGGA		intronic antisense	NM_001135648	PTPRK	receptor-type tyrosine-protein phosphatase kappa isoform a precursor	-	128289923	128841870	32.065	30.2556	4.90471	4.78065
ASHGA5P042616	1.0898	up	noncoding	ENST00000411489	RP1-86D1.4	GENCODE	339	chr6	+	128826269	128827421		TAAATCTGAGTGCTACTCCCAGATAGGACATAATACTTACTGGGATGGGCACTGCTTGGA		intronic antisense	NM_002844	PTPRK	receptor-type tyrosine-protein phosphatase kappa isoform b precursor	-	128289923	128841819	32.065	30.2556	4.90471	4.78065
ASHGA5P038369	1.0169	up	noncoding	uc010hqq.2	AK311120	UCSC_knowngene	1387	chr3	-	116162663	116164050		CAACTGTACCTACCCCTTGTTCTTTTTTCTAGCTTTCCTTGAATTTCTGGCAGATGCTAA		exon sense-overlapping	NM_002338	LSAMP	limbic system-associated membrane protein preproprotein	-	115521209	116164385	772.115	640.061	9.58627	9.56209
ASHGA5P033444	1.2142	up	noncoding	ENST00000433131	RP11-385F5.4	GENCODE	494	chr1	-	236703393	236713580		CACCCATGTGGCAGACACTCAAAATCTGTTGTATTTGCTAAATAAATTAATATGGACAAG		exon sense-overlapping	NM_018072	HEATR1	HEAT repeat-containing protein 1	-	236712304	236767841	143.86	110.873	7.15351	6.87351
ASHGA5P033444	1.2142	up	noncoding	ENST00000433131	RP11-385F5.4	GENCODE	494	chr1	-	236703393	236713580		CACCCATGTGGCAGACACTCAAAATCTGTTGTATTTGCTAAATAAATTAATATGGACAAG		natural antisense	NM_006499	LGALS8	galectin-8 isoform a	+	236686738	236716279	143.86	110.873	7.15351	6.87351
ASHGA5P033444	1.2142	up	noncoding	ENST00000433131	RP11-385F5.4	GENCODE	494	chr1	-	236703393	236713580		CACCCATGTGGCAGACACTCAAAATCTGTTGTATTTGCTAAATAAATTAATATGGACAAG		natural antisense	NM_201543	LGALS8	galectin-8 isoform b	+	236686738	236716279	143.86	110.873	7.15351	6.87351
ASHGA5P033444	1.2142	up	noncoding	ENST00000433131	RP11-385F5.4	GENCODE	494	chr1	-	236703393	236713580		CACCCATGTGGCAGACACTCAAAATCTGTTGTATTTGCTAAATAAATTAATATGGACAAG		natural antisense	NM_201544	LGALS8	galectin-8 isoform b	+	236687026	236716279	143.86	110.873	7.15351	6.87351
ASHGA5P033444	1.2142	up	noncoding	ENST00000433131	RP11-385F5.4	GENCODE	494	chr1	-	236703393	236713580		CACCCATGTGGCAGACACTCAAAATCTGTTGTATTTGCTAAATAAATTAATATGGACAAG		natural antisense	NM_201545	LGALS8	galectin-8 isoform a	+	236681513	236716279	143.86	110.873	7.15351	6.87351
ASHGA5P043248	1.58004	up	noncoding	TCONS_00019566	XLOC_009361	LincRNAs identified by Cabili et al	437	chr11	-	2900624	2902339		AACCCTACTACAATGTGGACACGGCAAGGACAAGGCATAATTCCAAACGAACACTGATGA		intergenic							8.64289	5	3.08552	2.42556
ASHGA5P016501	1.1878	up	noncoding	uc010lgv.1	PMS2P1	UCSC_knowngene	1245	chr7	-	99918262	99933930		TTGGCTTTCGGGGGGAAGCTCTGAGCTCACTTTGTGCACTGAGGACTCCTAGAAGTACCC	5379	natural antisense	NM_001004351	SPDYE3	speedy protein E3	+	99905324	99919819	872.976	620.13	9.76361	9.51532
ASHGA5P029651	1.14219	up	noncoding	TCONS_00008929	XLOC_003772	LincRNAs identified by Cabili et al	2060	chr4	+	170860020	170862823		TATAATGATATAATCTTCCTCATCCTCCCTCACTCGACTGAGTGGTGATGGACAGTGGAG		intergenic							4535.65	3250.1	12.1433	11.9515
ASHGA5P033218	1.1878	up	noncoding	TCONS_00016098	XLOC_007489	LincRNAs identified by Cabili et al	315	chr9	+	102648727	102657226		CACAGGTAGAAAGTCACTGCCCTTTGGAGAATAGATGTTTACCTTTTCCAGAAACAGTCG		intergenic							28814.1	20860	14.7812	14.5329
ASHGA5P017700	1.45325	up	noncoding	ENST00000444846	MEG9	GENCODE	2403	chr14	+	101536823	101539271		GCACCTGCCTTGAGTGACCAGAGGGGGACTGGGAATGGAAAGGACCTCAAGGAAGGACAA	100507257	intergenic							45.4875	32.2391	5.43025	4.89097
ASHGA5P017123	2.77124	up	noncoding	ENST00000437859	RP3-417L20.4	GENCODE	381	chr6	+	49785142	49788155		TTCTACAAGTTAAATATCTGGATATCTTAAATCTCAGATGAGCGTCTTAGCCTCTGGATT		intergenic							28.6997	12.1289	4.74963	3.2791
ASHGA5P039923	1.05437	up	noncoding	TCONS_00023171	XLOC_011119	LincRNAs identified by Cabili et al	945	chr14	-	99750983	99753677	TCONS_00023170	GCCGATGTCATCTAGAACTCTGGGGGATTGGGGGAAAACGAACAGAACCAGATTAAAAAA		intergenic							48.4736	45.8037	5.52539	5.44901
ASHGA5P038073	1.18115	up	noncoding	ENST00000418972	RP11-204C23.1	GENCODE	357	chr3	-	2004064	2029154		TCTTACCTCGAAAGCATTCATCAGGACAGTGGCTCCCAATTGTGAGTTATTATTATTTTC		intergenic							1774.08	1237.11	10.7913	10.5511
ASHGA5P000200	1.06614	up	noncoding	chr10:44057525-44069225+	chr10:44057525-44069225	LincRNAs identified by Khalil et al	11700	chr10	+	44737519	44749219		AGAAGACATTGCTCATAATCCCCTGTCAGCACAAGAGTCTGCCCAGAAATAGAAACACAG		intergenic							669.018	526.287	9.36729	9.2749
ASHGA5P026000	1.16191	up	noncoding	NR_051956	ARFRP1	RefSeq	2570	chr20	-	62329994	62339365	NM_001134758, NM_001267544, NM_001267546, NM_001267547, NM_001267548, NM_001267549, NM_003224, NR_051954, NR_051955, NR_051957	ATTGACTCCACCGACGAGGAGAGGCTGGCTGAGTCCAAGCAGGCGTTTGGTGGTGACCAG	10139	exon sense-overlapping	NM_001134758	ARFRP1	ADP-ribosylation factor-related protein 1 isoform b	-	62329994	62339365	232.129	178.114	7.85413	7.63763
ASHGA5P026000	1.16191	up	noncoding	NR_051956	ARFRP1	RefSeq	2570	chr20	-	62329994	62339365	NM_001134758, NM_001267544, NM_001267546, NM_001267547, NM_001267548, NM_001267549, NM_003224, NR_051954, NR_051955, NR_051957	ATTGACTCCACCGACGAGGAGAGGCTGGCTGAGTCCAAGCAGGCGTTTGGTGGTGACCAG	10139	exon sense-overlapping	NM_001267544	ARFRP1	ADP-ribosylation factor-related protein 1 isoform c	-	62329994	62339365	232.129	178.114	7.85413	7.63763
ASHGA5P026000	1.16191	up	noncoding	NR_051956	ARFRP1	RefSeq	2570	chr20	-	62329994	62339365	NM_001134758, NM_001267544, NM_001267546, NM_001267547, NM_001267548, NM_001267549, NM_003224, NR_051954, NR_051955, NR_051957	ATTGACTCCACCGACGAGGAGAGGCTGGCTGAGTCCAAGCAGGCGTTTGGTGGTGACCAG	10139	exon sense-overlapping	NM_001267545	ARFRP1	ADP-ribosylation factor-related protein 1 isoform d	-	62329994	62339365	232.129	178.114	7.85413	7.63763
ASHGA5P026000	1.16191	up	noncoding	NR_051956	ARFRP1	RefSeq	2570	chr20	-	62329994	62339365	NM_001134758, NM_001267544, NM_001267546, NM_001267547, NM_001267548, NM_001267549, NM_003224, NR_051954, NR_051955, NR_051957	ATTGACTCCACCGACGAGGAGAGGCTGGCTGAGTCCAAGCAGGCGTTTGGTGGTGACCAG	10139	exon sense-overlapping	NM_001267546	ARFRP1	ADP-ribosylation factor-related protein 1 isoform e	-	62329994	62339365	232.129	178.114	7.85413	7.63763
ASHGA5P026000	1.16191	up	noncoding	NR_051956	ARFRP1	RefSeq	2570	chr20	-	62329994	62339365	NM_001134758, NM_001267544, NM_001267546, NM_001267547, NM_001267548, NM_001267549, NM_003224, NR_051954, NR_051955, NR_051957	ATTGACTCCACCGACGAGGAGAGGCTGGCTGAGTCCAAGCAGGCGTTTGGTGGTGACCAG	10139	exon sense-overlapping	NM_001267547	ARFRP1	ADP-ribosylation factor-related protein 1 isoform a	-	62329994	62339365	232.129	178.114	7.85413	7.63763
ASHGA5P026000	1.16191	up	noncoding	NR_051956	ARFRP1	RefSeq	2570	chr20	-	62329994	62339365	NM_001134758, NM_001267544, NM_001267546, NM_001267547, NM_001267548, NM_001267549, NM_003224, NR_051954, NR_051955, NR_051957	ATTGACTCCACCGACGAGGAGAGGCTGGCTGAGTCCAAGCAGGCGTTTGGTGGTGACCAG	10139	exon sense-overlapping	NM_001267548	ARFRP1	ADP-ribosylation factor-related protein 1 isoform a	-	62329994	62339205	232.129	178.114	7.85413	7.63763
ASHGA5P026000	1.16191	up	noncoding	NR_051956	ARFRP1	RefSeq	2570	chr20	-	62329994	62339365	NM_001134758, NM_001267544, NM_001267546, NM_001267547, NM_001267548, NM_001267549, NM_003224, NR_051954, NR_051955, NR_051957	ATTGACTCCACCGACGAGGAGAGGCTGGCTGAGTCCAAGCAGGCGTTTGGTGGTGACCAG	10139	exon sense-overlapping	NM_001267549	ARFRP1	ADP-ribosylation factor-related protein 1 isoform b	-	62329994	62339365	232.129	178.114	7.85413	7.63763
ASHGA5P026000	1.16191	up	noncoding	NR_051956	ARFRP1	RefSeq	2570	chr20	-	62329994	62339365	NM_001134758, NM_001267544, NM_001267546, NM_001267547, NM_001267548, NM_001267549, NM_003224, NR_051954, NR_051955, NR_051957	ATTGACTCCACCGACGAGGAGAGGCTGGCTGAGTCCAAGCAGGCGTTTGGTGGTGACCAG	10139	exon sense-overlapping	NM_003224	ARFRP1	ADP-ribosylation factor-related protein 1 isoform a	-	62329994	62339365	232.129	178.114	7.85413	7.63763
ASHGA5P026000	1.16191	up	noncoding	NR_051956	ARFRP1	RefSeq	2570	chr20	-	62329994	62339365	NM_001134758, NM_001267544, NM_001267546, NM_001267547, NM_001267548, NM_001267549, NM_003224, NR_051954, NR_051955, NR_051957	ATTGACTCCACCGACGAGGAGAGGCTGGCTGAGTCCAAGCAGGCGTTTGGTGGTGACCAG	10139	intronic antisense	NM_001083113	ZGPAT	zinc finger CCCH-type with G patch domain-containing protein isoform c	+	62338793	62367494	232.129	178.114	7.85413	7.63763
ASHGA5P026000	1.16191	up	noncoding	NR_051956	ARFRP1	RefSeq	2570	chr20	-	62329994	62339365	NM_001134758, NM_001267544, NM_001267546, NM_001267547, NM_001267548, NM_001267549, NM_003224, NR_051954, NR_051955, NR_051957	ATTGACTCCACCGACGAGGAGAGGCTGGCTGAGTCCAAGCAGGCGTTTGGTGGTGACCAG	10139	natural antisense	NM_003823	TNFRSF6B	tumor necrosis factor receptor superfamily member 6B precursor	+	62328003	62330051	232.129	178.114	7.85413	7.63763
ASHGA5P057809	1.38828	up	noncoding	TCONS_00022116	XLOC_010723	LincRNAs identified by Cabili et al	6096	chr13	-	111516627	111522837	TCONS_00022115	GAAAACACAGGAAGAGAAGCAGAGGAACACGTCATGGAGACGGACCGAGTTGAAGGAGCC		exon sense-overlapping	ENST00000538077	LINC00346	long intergenic non-protein coding RNA 346 [Source:HGNC Symbol;Acc:27492]	-	111521577	111522162	61.5965	44.8452	5.88724	5.41394
ASHGA5P056822	3.71318	up	noncoding	TCONS_00009014	XLOC_003863	LincRNAs identified by Cabili et al	803	chr4	-	4562270	4577618	TCONS_00009012, TCONS_00009017	ACGCCTAAGGGCTCAAGCCGTCTGTGTAATTATCTTAAACTTTTTCATTTCGGAAATGAA		intergenic							37.9258	11.9715	5.1563	3.26364
ASHGA5P038717	3.64623	up	noncoding	ENST00000419658	RP4-601K24.1	GENCODE	338	chr1	+	83373244	83463244		CACTGAGAGAAACTGGGAAGAGGTAAATAGTGTTACAGAGGATACTTTACTAGAAAATGG		intergenic							1176.69	280.502	10.1926	8.32618
ASHGA5P020258	1.02044	up	noncoding	ENST00000510550	RP11-90J7.3	GENCODE	595	chr10	+	80166300	80310614		CCGTGTTCAGAAAAAGTTTGCCAACTCCTGCTCTAGATTGATGGTTACAAAGTCTGACAG		intergenic							589.677	486.472	9.18899	9.1598
ASHGA5P052243	1	up	noncoding	NR_034107	LOC257396	RefSeq	2352	chr5	+	52405686	52410952		GCCGGGCTCTAGCTGTTTCCCTCAGGCGGCCTGTTCCACGCCAGGATTAGTTTTGCTTCG	257396	bidirectional	NM_004531	MOCS2	molybdopterin synthase catalytic subunit large subunit MOCS2B	-	52393894	52405325	2553.37	2102.56	11.306	11.306
ASHGA5P052243	1	up	noncoding	NR_034107	LOC257396	RefSeq	2352	chr5	+	52405686	52410952		GCCGGGCTCTAGCTGTTTCCCTCAGGCGGCCTGTTCCACGCCAGGATTAGTTTTGCTTCG	257396	bidirectional	NM_176806	MOCS2	molybdopterin synthase catalytic subunit small subunit MOCS2A	-	52393894	52405598	2553.37	2102.56	11.306	11.306
ASHGA5P043584	1.40158	up	noncoding	uc003szj.3	TSL-A	UCSC_knowngene	1312	chr7	+	27655592	27667111		AAATGAGTGAATGTGAAGGCTTAGGAAAGGCCCAGGCTAATGTGTGTGATCATGTCTTCG		intronic antisense	NM_152740	HIBADH	3-hydroxyisobutyrate dehydrogenase, mitochondrial precursor	-	27565058	27702620	81.3867	56.9424	6.29373	5.80668
ASHGA5P054912	2.38343	up	noncoding	ENST00000537869	SNHG1	GENCODE	1038	chr11	-	62619462	62622932	ENST00000537068, ENST00000539921, NR_003098, uc001nvr.3, uc001nvs.3, uc001nvt.3	GGACTGGCTGTCAATTTGTGTTGCTGTGTTGGTTGTTGATGAAAATAATAAAATGATTGA	23642	bidirectional	NM_001012662	SLC3A2	4F2 cell-surface antigen heavy chain isoform b	+	62623483	62656355	134972	51272.6	17.009	15.756
ASHGA5P054912	2.38343	up	noncoding	ENST00000537869	SNHG1	GENCODE	1038	chr11	-	62619462	62622932	ENST00000537068, ENST00000539921, NR_003098, uc001nvr.3, uc001nvs.3, uc001nvt.3	GGACTGGCTGTCAATTTGTGTTGCTGTGTTGGTTGTTGATGAAAATAATAAAATGATTGA	23642	bidirectional	NM_001012664	SLC3A2	4F2 cell-surface antigen heavy chain isoform e	+	62623483	62656355	134972	51272.6	17.009	15.756
ASHGA5P054912	2.38343	up	noncoding	ENST00000537869	SNHG1	GENCODE	1038	chr11	-	62619462	62622932	ENST00000537068, ENST00000539921, NR_003098, uc001nvr.3, uc001nvs.3, uc001nvt.3	GGACTGGCTGTCAATTTGTGTTGCTGTGTTGGTTGTTGATGAAAATAATAAAATGATTGA	23642	bidirectional	NM_002394	SLC3A2	4F2 cell-surface antigen heavy chain isoform c	+	62623483	62656355	134972	51272.6	17.009	15.756
ASHGA5P030166	1.15262	up	noncoding	ENST00000569742	RP11-797A18.4	GENCODE	1356	chr15	-	77334177	77335533		TGTGTTAGCTGTGTGGGTACATTAGTACCATGATTAACCAAGGTGTATAAAGGGCAGGCC		intergenic							111.266	91.1641	6.77165	6.56673
ASHGA5P028792	1.26669	up	noncoding	ENST00000425609	LINC00400	GENCODE	547	chr13	+	43732766	43733602		TAGGTCAATAAAAAGGATTTTATTTAGTCTACAAGAAATCTGGACAAAGGTGGTTCCAGG		intergenic							33.725	27.7724	4.98387	4.6428
ASHGA5P050390	1.42195	up	noncoding	ENST00000451644	AC096559.1	GENCODE	623	chr2	+	12147241	12271711		CCTGAAAAGTGTTGTATTCCAGTGTGCCTCGGAAAAGAAAATAGGATTAATAAACTTTGA		intergenic							290.854	182.884	8.18428	7.67641
ASHGA5P048444	1.71181	up	noncoding	uc001pnn.3	AL833634	UCSC_knowngene	1885	chr11	-	112830002	112834134		GTTGCTGTATTTAAGTGTCTTTGATTTCAGACTTCTGCTTCTAACATCTAAAATCACCAC		natural antisense	NM_000615	NCAM1	neural cell adhesion molecule 1 isoform 1 precursor	+	112831968	113149158	54.7272	33.1443	5.7099	4.93437
ASHGA5P048444	1.71181	up	noncoding	uc001pnn.3	AL833634	UCSC_knowngene	1885	chr11	-	112830002	112834134		GTTGCTGTATTTAAGTGTCTTTGATTTCAGACTTCTGCTTCTAACATCTAAAATCACCAC		natural antisense	NM_001076682	NCAM1	neural cell adhesion molecule 1 isoform 3 precursor	+	112831968	113135919	54.7272	33.1443	5.7099	4.93437
ASHGA5P048444	1.71181	up	noncoding	uc001pnn.3	AL833634	UCSC_knowngene	1885	chr11	-	112830002	112834134		GTTGCTGTATTTAAGTGTCTTTGATTTCAGACTTCTGCTTCTAACATCTAAAATCACCAC		natural antisense	NM_001242607	NCAM1	neural cell adhesion molecule 1 isoform 5 precursor	+	112831968	113149158	54.7272	33.1443	5.7099	4.93437
ASHGA5P048444	1.71181	up	noncoding	uc001pnn.3	AL833634	UCSC_knowngene	1885	chr11	-	112830002	112834134		GTTGCTGTATTTAAGTGTCTTTGATTTCAGACTTCTGCTTCTAACATCTAAAATCACCAC		natural antisense	NM_001242608	NCAM1	neural cell adhesion molecule 1 isoform 4 precursor	+	112831968	113135919	54.7272	33.1443	5.7099	4.93437
ASHGA5P048444	1.71181	up	noncoding	uc001pnn.3	AL833634	UCSC_knowngene	1885	chr11	-	112830002	112834134		GTTGCTGTATTTAAGTGTCTTTGATTTCAGACTTCTGCTTCTAACATCTAAAATCACCAC		natural antisense	NM_181351	NCAM1	neural cell adhesion molecule 1 isoform 2 precursor	+	112831968	113149158	54.7272	33.1443	5.7099	4.93437
ASHGA5P000162	3.43167	up	noncoding	chr1:242433950-242449875+	chr1:242433950-242449875	LincRNAs identified by Khalil et al	15925	chr1	+	244367327	244383252		CCTTAGGGTTAAAGTGCTGCAATGTGAAAAAGCCAAGTTAAAAGACAAGGGGCTCCAGTG		intergenic							29.4935	9.78418	4.78679	3.00788
ASHGA5P057443	1.67815	up	noncoding	TCONS_00017392	XLOC_007916	LincRNAs identified by Cabili et al	279	chrX	+	1862406	1862778		ATGAACATACTGTTTTCAGGACCCTATCTAGCCCACCATGTATTTTCAGAGCTGCCCTTG		intergenic							617.513	315.857	9.2532	8.50633
ASHGA5P055085	1.06866	up	noncoding	TCONS_00029632	XLOC_014288	LincRNAs identified by Cabili et al	2301	chr22	+	51022832	51035727		AATCTTGGTGGATTCAAGTAAATGATGATGCCCTGCACAAACTTAGCCAAGTCGTGTCCC		intergenic							82.0482	72.6511	6.30435	6.20855
ASHGA5P055875	1.00941	up	noncoding	ENST00000550512	AL589743.2	GENCODE	777	chr14	-	19670479	19673623	ENST00000549877	AACAATTGTATATTCATGGAATATTTTGGAACGGAATACCAAAAAATGGCAATAGTGGTT		intergenic							25.5523	26.4975	4.58108	4.56757
ASHGA5P022918	1.96782	up	noncoding	ENST00000565520	GS1-279B7.1	GENCODE	609	chr1	-	185300388	185304171		AGACAGCTTGGGAAAAGCAACATAACTGTACATGAACCCTCAACTGATCATTAAAGGGAT		intergenic							54.5932	29.3079	5.70616	4.72956
ASHGA5P041971	1.00255	up	noncoding	ENST00000418134	RP1-60O19.1	GENCODE	650	chr6	-	107172489	107187962		TTTAAAACTCACGACTCCTTGAATCAATAGTCAATTTCTGGATCTTTCTCCTCCTCCTAG		intergenic							410.382	350.587	8.66778	8.6641
ASHGA5P017392	1.25425	up	noncoding	ENST00000440947	RP11-120J1.1	GENCODE	793	chr9	+	14347318	14357907		CACCCTCAAGGTCTGCAGGACACACCAAAGAACTCCTCCAAGTCACACAAGGGAGAAAAT		intronic antisense	NM_001190738	NFIB	nuclear factor 1 B-type isoform 2	-	14081841	14398982	74.3758	57.7387	6.15807	5.83125
ASHGA5P055706	1.1143	up	noncoding	ENST00000567788	RP11-474D1.3	GENCODE	4592	chr12	-	130517998	130529602		TTCCCTGTATCTAAATTTTAGCAAGTGAGAGAATGCCTCAGTCCCCTGTATCTGAATTTT		intergenic							295.679	233.215	8.20758	8.05144
ASHGA5P023833	1.26706	up	noncoding	HMlincRNA599-	HMlincRNA599	LincRNAs identified by Khalil et al	19521	chr12	-	47935555	47955076		TCCCACCAGACAGACCCAGGTGCTCGAGCACTTTTAAAGGAAATATGTCTACTCTTGAAA		intergenic							25.8235	21.8259	4.59582	4.25433
ASHGA5P022099	1.2941	up	noncoding	ENST00000549103	RP11-136F16.1	GENCODE	475	chr12	-	78445960	78485517		TCTTAGCATCTTCCGCACAGGTCGTGTCACCCTTCAAACATAAGCTTTTCATGAATGAAG		intronic antisense	NM_014903	NAV3	neuron navigator 3	+	78225068	78606790	531.668	350.351	9.03519	8.66324
ASHGA5P039212	1.86803	up	noncoding	ENST00000421006	RP11-78H24.1	GENCODE	575	chr3	+	186158192	186162847		GACTACCAGTTTTAATGAGGTACTTCTTTCTAACTCCATCAGCTGTGTGGCTATCTGCAG		intergenic							36.1406	20.9851	5.08938	4.18786
ASHGA5P033519	1.01411	up	noncoding	ENST00000579413	RP11-856M7.4	GENCODE	422	chr18	-	10627642	10628843	NR_049896	TAGGTCCATTTTGGGTTTACTCCTTTGTGCTGCTTCATGATGCCTTAGGACAAGGACAAG		intergenic							393.661	334.089	8.60856	8.58834
ASHGA5P037519	2.14783	up	noncoding	TCONS_00026020	XLOC_012360	LincRNAs identified by Cabili et al	861	chr17	-	4062959	4063932		TAGATATAGGGGTACAGCGCTGAGTAATGTGGATTATAGGGGTACGGCACTGAGTAAAGT		intronic antisense	ENST00000573984	CYB5D2	cytochrome b5 domain containing 2 [Source:HGNC Symbol;Acc:28471]	+	4046995	4090605	17.8522	9.38019	4.05388	2.95101
ASHGA5P021627	1.4864	up	noncoding	ENST00000536505	RP4-765H13.1	GENCODE	280	chr12	+	126675923	126709860		CCCGACAAAGTTATCCTGGATCCTATCTTTGGTACCAATGTGACCCATCCTGAGTGAAGG		intergenic							131.354	83.8369	7.01316	6.44135
ASHGA5P057506	1.56329	up	noncoding	TCONS_00018396	XLOC_008678	LincRNAs identified by Cabili et al	305	chr10	+	134827231	134827947		ATGTCACCTGGCAGAGGGTCGACCAGGGAGCACAGAGCCCTGAACATCCCTTCAACAGCG		intergenic							150.306	91.4625	7.2158	6.57122
ASHGA5P043149	1.11433	up	noncoding	uc011kfv.1	PMS2L2	UCSC_knowngene	455	chr7	-	74973235	74982902	ENST00000529061, NR_003613, NR_003614, NR_023383, NR_027775, NR_027776, NR_028058, uc003txh.4, uc003txn.4, uc003uca.4, uc003uui.2, uc010lbw.2, uc010lgv.1, uc011kep.2, uc011kfp.2, uc011kfq.2, uc011kfr.1, uc011kft.1	ACCCCTGCTCCTTGGAGGACAACGTGATCACTGTATTCAGCTCTGTCAAGAATGGTCCAG	5380	intergenic							3874.82	2836.86	11.9012	11.7451
ASHGA5P022112	1.51551	up	noncoding	NR_037715	RNASEK	RefSeq	1047	chr17	+	6915735	6917852		TCCGAATCCAATAATGCTCGGAATATTTTTCAATGTCCATTCCGCTGTGTTGATTGAGGA	440400	exon sense-overlapping	NM_001004333	RNASEK	ribonuclease kappa	+	6915735	6917852	19611.3	11131.5	14.2453	13.6455
ASHGA5P039647	1.63487	up	noncoding	ENST00000507849	RP11-563M4.1	GENCODE	481	chr4	-	149948596	149983674		GCTGACCTGCATGACCTACAACATGCACCTAGCAATCATTTATGTATTTGATATATTTTT		intergenic							39.5721	25.5416	5.22114	4.51197
ASHGA5P025952	1.42028	up	noncoding	NR_047594	CENPJ	RefSeq	5246	chr13	-	25456411	25497027		ACATCCAGCTCTGTTACACTTTTTAACATGGAGGCAATCCACCTCGAAGATCCAAGTCTG	55835	exon sense-overlapping	NM_018451	CENPJ	centromere protein J	-	25456411	25497027	190.288	123.613	7.56198	7.0558
ASHGA5P042717	1.08042	up	noncoding	ENST00000366273	RP11-288H12.3	pseudogene	571	chr6	+	160514454	160515025	NM_007236	GCATGGGGACAGTGCCATATCTTTATCACAGACTTTGCTAAGGTTTTGGAGAAGGTGGAT									2142.42	1634.5	11.0541	10.9425
ASHGA5P042165	1.14804	up	noncoding	NR_033862	DKFZp451B082	RefSeq	4931	chr6	-	163759373	163768065		AAGCACTGTCCTAACCAATTCTGATTGGTTCACTTCTAGTTACATGATATAATAAACGTC	401282	intergenic							25.5338	23.6308	4.58033	4.38116
ASHGA5P049607	2.89392	up	noncoding	ENST00000579692	RP11-848P1.9	GENCODE	739	chr17	+	29335514	29349359		CATCAACCACCTCAAAGACACTGGTTGTGAGTAGATACTACTGCTTTTCAAATTTTATAT		intergenic							315.315	103.442	8.2971	6.76408
ASHGA5P043418	1.00387	up	noncoding	TCONS_00018246	XLOC_008522	LincRNAs identified by Cabili et al	3769	chr10	+	77185871	77190266		ATTTTTGTGATTTCTGCACATGATCCTTCCCCACACCATCAACTGGCCTTCTTGATGTGT		intergenic							1397.72	1131.49	10.4266	10.421
ASHGA5P032949	1.19887	up	noncoding	ENST00000581673	RP11-381P6.1	GENCODE	621	chr17	+	20867034	20883551		TTGGTTTCAGGAGGAAAGGAAGATAAACCCCTGTGTTTAAGCTGCCGTGTTAAATGGGAG		intergenic							97.1976	76.8336	6.56218	6.30051
ASHGA5P034884	1.18625	up	noncoding	TCONS_00003577	XLOC_001351	LincRNAs identified by Cabili et al	379	chr2	+	11547408	11561393		TAGTGTTGGATTTGAAGGAAGAAGCCCCAGGAGCTGCTGAGAGCTGTTTTATAACCATGA		intergenic							37.3426	32.185	5.13404	4.88764
ASHGA5P019686	1.57998	up	noncoding	ENST00000500197	LINC00461	GENCODE	3381	chr5	-	87960262	87969157		GGCATGGGGGACGCCGAAAGAAGCCTGTTTGTGTGCTGCGGCCGTGCTGTGACTTTGGAT	645323	intergenic							105.001	64.4304	6.67741	6.01751
ASHGA5P056761	1.03898	up	noncoding	TCONS_00008464	XLOC_003925	LincRNAs identified by Cabili et al	405	chr4	-	38194960	38208228		ACAATCTATTGCTCCAGAAGAGTTCATCTTTTGCCCTAGTCCATTTCCTCTTGCACTGCT		intergenic							318.429	268.221	8.31058	8.25541
ASHGA5P022805	1.34363	up	noncoding	ENST00000563052	CTD-2049O4.1	GENCODE	679	chr16	-	27719746	27730097		AAACCACATCCCCAAATCCAGCGGGATCTCAGAGAGAAAGGCTGATGGGAAGCTGCCCAG		natural antisense	NM_015202	KIAA0556	uncharacterized protein KIAA0556	+	27561467	27791692	104.31	74.0998	6.66666	6.24052
ASHGA5P056990	1.38754	up	noncoding	TCONS_00011842	XLOC_005326	LincRNAs identified by Cabili et al	286	chr6	+	53488291	53489514		TTTTTGCAAGAACGCCAGAAGTGCCAAGCAATTAACAACCCCAGAAGCAACCCTTAACCA		intergenic							31.6631	24.0827	4.88676	4.41423
ASHGA5P016152	1.05068	up	noncoding	ENST00000427303	RP11-445H22.4	GENCODE	528	chr20	-	43340502	43374662		AAAGGAAATCTCTCCAACCAGGAACAAACACCTGCCTTGCAATATTAGGTCCTTCCTAGG		intronic antisense	NM_003881	WISP2	WNT1-inducible-signaling pathway protein 2 precursor	+	43343884	43356452	135.909	118.838	7.06399	6.99266
ASHGA5P016152	1.05068	up	noncoding	ENST00000427303	RP11-445H22.4	GENCODE	528	chr20	-	43340502	43374662		AAAGGAAATCTCTCCAACCAGGAACAAACACCTGCCTTGCAATATTAGGTCCTTCCTAGG		natural antisense	NM_022358	KCNK15	potassium channel subfamily K member 15 precursor	+	43374487	43380954	135.909	118.838	7.06399	6.99266
ASHGA5P052394	1.54214	up	noncoding	ENST00000435042	AC004041.2	GENCODE	472	chr5	-	131973767	131999964		CGCCTGGGATTTTCCTGACCTGTTACTACTTTTCTCTGGAAGAAAAATTTAAAAGTAATA		intronic antisense	NM_002188	IL13	interleukin-13 precursor	+	131993864	131996801	161.679	98.7004	7.3185	6.69356
ASHGA5P052394	1.54214	up	noncoding	ENST00000435042	AC004041.2	GENCODE	472	chr5	-	131973767	131999964		CGCCTGGGATTTTCCTGACCTGTTACTACTTTTCTCTGGAAGAAAAATTTAAAAGTAATA		natural antisense	NM_005732	RAD50	DNA repair protein RAD50	+	131892615	131980313	161.679	98.7004	7.3185	6.69356
ASHGA5P048528	1.20824	up	noncoding	ENST00000531241	RP11-677M14.2-001	GENCODE	445	chr11	-	124614529	124616233		CAGGTGCAATAACGGTGTTTTACAGGCATTATTTTATTTAGTCCCCCAAAATAAAGCTAT		natural antisense	NM_001126181	NRGN	neurogranin	+	124609828	124617102	260.768	191.576	8.02113	7.74822
ASHGA5P048528	1.20824	up	noncoding	ENST00000531241	RP11-677M14.2-001	GENCODE	445	chr11	-	124614529	124616233		CAGGTGCAATAACGGTGTTTTACAGGCATTATTTTATTTAGTCCCCCAAAATAAAGCTAT		natural antisense	NM_006176	NRGN	neurogranin	+	124609828	124617102	260.768	191.576	8.02113	7.74822
ASHGA5P034441	1.05329	up	noncoding	uc002mkb.1	DKFZp547H118	UCSC_knowngene	1809	chr19	+	8552185	8553994		CTTTTTGACTCTGTCCACCAAAATCTAACAAAATCGGGACTGAGTGTCGTCTCTTCTTCC		exon sense-overlapping	NM_005968	HNRNPM	heterogeneous nuclear ribonucleoprotein M isoform a	+	8509802	8554002	78.7865	70.9607	6.24774	6.17284
ASHGA5P034441	1.05329	up	noncoding	uc002mkb.1	DKFZp547H118	UCSC_knowngene	1809	chr19	+	8552185	8553994		CTTTTTGACTCTGTCCACCAAAATCTAACAAAATCGGGACTGAGTGTCGTCTCTTCTTCC		exon sense-overlapping	NM_031203	HNRNPM	heterogeneous nuclear ribonucleoprotein M isoform b	+	8509802	8554002	78.7865	70.9607	6.24774	6.17284
ASHGA5P057360	4.22322	up	noncoding	TCONS_00016324	XLOC_007698	LincRNAs identified by Cabili et al	285	chr9	-	46122188	46123597		AGTTTGAAGGGAGCTCAGAGATGCCCGGGAAGACGGGGGGCCCGAATGGAAGCAGAAAAA		intergenic							64.7315	17.4845	5.95845	3.88011
ASHGA5P039773	1.1453	up	noncoding	ENST00000502641	RP11-503N18.4	GENCODE	220	chr4	+	2465523	2465851		AAAGGACAAGAGCCCTACTCCAATATTCTGAGTTTGTGAGAACCCCAGGATTTTACCACC		intron sense-overlapping	ENST00000503659	RNF4	ring finger protein 4 [Source:HGNC Symbol;Acc:10067]	+	2463946	2498739	203.021	159.437	7.65849	7.46277
ASHGA5P049724	1.17431	up	noncoding	ENST00000584428	RP5-890E16.2	GENCODE	539	chr17	-	46124242	46125435		GGGCGATGTTAGTGGGCTTGGGCGTTGGGTGAAGTATCCAGGTTGGGCGCTTCCAGCGCT		bidirectional	NM_003204	NFE2L1	nuclear factor erythroid 2-related factor 1	+	46125685	46138907	140.091	111.369	7.11194	6.88013
ASHGA5P026632	1.12057	up	noncoding	ENST00000540547	RP11-707G14.1	GENCODE	428	chr11	+	73471607	73472115		CCTCTCACGCGCAGCGCCTGAGCTTCCACAGCTGCCGCCGCCGCCGCAGCCCAACCTGCT		natural antisense	NM_001243718	RAB6A	ras-related protein Rab-6A isoform d	-	73386682	73472201	23761.7	18547.8	14.5272	14.363
ASHGA5P026632	1.12057	up	noncoding	ENST00000540547	RP11-707G14.1	GENCODE	428	chr11	+	73471607	73472115		CCTCTCACGCGCAGCGCCTGAGCTTCCACAGCTGCCGCCGCCGCCGCAGCCCAACCTGCT		natural antisense	NM_002869	RAB6A	ras-related protein Rab-6A isoform a	-	73386682	73472201	23761.7	18547.8	14.5272	14.363
ASHGA5P026632	1.12057	up	noncoding	ENST00000540547	RP11-707G14.1	GENCODE	428	chr11	+	73471607	73472115		CCTCTCACGCGCAGCGCCTGAGCTTCCACAGCTGCCGCCGCCGCCGCAGCCCAACCTGCT		natural antisense	NM_198896	RAB6A	ras-related protein Rab-6A isoform b	-	73386682	73472201	23761.7	18547.8	14.5272	14.363
ASHGA5P016899	1.25021	up	noncoding	ENST00000435493	LINC00323	GENCODE	349	chr21	-	42515068	42519350		AGGAAGTGAGGTGAGGTCACCTGTAGAGGTCATGCTGCGGAGTCCCGAGTCCCTGATTAT	284835	intergenic							1289.53	849.535	10.3174	9.99528
ASHGA5P027165	1.21526	up	noncoding	TCONS_00011686	XLOC_005163	LincRNAs identified by Cabili et al	634	chr6	+	8790347	8792491		TTGTTGTTGTTTTTAGTCCTAAGTTAGTGGCATGAAAGCACTGCCCTGGAAGCGATGGAG		intergenic							275.043	200.668	8.10223	7.82096
ASHGA5P045203	1.1538	up	noncoding	TCONS_00001045	XLOC_000306	LincRNAs identified by Cabili et al	251	chr1	+	95546645	95550539		AAAGAATGAAGCTTTTATGCAACAACCAGGGACACCACTTTGGTCAGCATCATGCCTGTC		intergenic							28.0415	25.5383	4.71809	4.5117
ASHGA5P045274	1.42887	up	noncoding	ENST00000414515	RP11-195E11.2	GENCODE	622	chr9	-	72702212	72728782		CCTAAAATACCTCTAGTTGAAGCCAAAGTTAGAATCCTTCTACGAAACTACAGGATTAAA		intronic antisense	NM_153267	MAMDC2	MAM domain-containing protein 2 precursor	+	72658496	72841888	1548.62	889.496	10.5784	10.0635
ASHGA5P040498	1.09608	up	noncoding	ENST00000513767	CTC-347C20.1	GENCODE	958	chr5	-	71982938	72057492		GGCCTGTGGCTGAGATAAATGAAGCATCTCTCATATATGTGTTATGATTTTTCAAGTAAA		intergenic							47.5675	43.437	5.49802	5.36567
ASHGA5P049734	2.03529	up	noncoding	ENST00000430643	RP11-767N6.7	GENCODE	598	chr1	-	46160355	46162747		TATAGACTAAGCTATAACTCATGTGCCTTTACTATTTCTAGTTACAGAGAATCTGTATTC		intron sense-overlapping	NM_001145349	IPP	actin-binding protein IPP isoform 2	-	46159997	46216485	19.9301	11.299	4.21467	3.18944
ASHGA5P028356	1.1647	up	noncoding	ENST00000543072	RP13-942N8.1	GENCODE	752	chr12	+	123849499	123850660		TGTGAACTCTTCCAGAGACAAAGTATTCGGGGAAAGAAAGGAAAAAGTAGGCACAGAAAG		intergenic							27.6481	25.0366	4.69829	4.47833
ASHGA5P044186	1.00598	up	noncoding	ENST00000520023	EXTL3-AS1	GENCODE	780	chr8	-	28555919	28558981		GTAACTTAACACATTGCTGCCCTTAACTTTGACTTACTTGCTTTTAAAGATGATGAAGCT		intronic antisense	ENST00000523149	EXTL3	exostoses (multiple)-like 3 [Source:HGNC Symbol;Acc:3518]	+	28480245	28608420	173.204	154.837	7.42176	7.41316
ASHGA5P044186	1.00598	up	noncoding	ENST00000520023	EXTL3-AS1	GENCODE	780	chr8	-	28555919	28558981		GTAACTTAACACATTGCTGCCCTTAACTTTGACTTACTTGCTTTTAAAGATGATGAAGCT		natural antisense	ENST00000220562	EXTL3	exostoses (multiple)-like 3 [Source:HGNC Symbol;Acc:3518]	+	28558843	28611204	173.204	154.837	7.42176	7.41316
ASHGA5P056626	1.39915	up	noncoding	TCONS_00006740	XLOC_003380	LincRNAs identified by Cabili et al	2837	chr3	-	193565531	193570323		AACTCAGACGGAAGAAAAAGGATTCCTCTGGAGAATCCCAGCAGGTTTCTGATTGGACAT		intergenic							100.766	68.9954	6.61503	6.13048
ASHGA5P038850	1.80835	up	noncoding	ENST00000425185	RP4-665J23.2	GENCODE	580	chr1	+	91317315	91319843		CCCTGTGAACTACGGAGAGACCCCAGAGGAGAGATTTCCTTATTGTGTAAACACAAATCA		intergenic							42.6617	25.1005	5.33692	4.48225
ASHGA5P051150	2.07777	up	noncoding	ENST00000332440	LINC00313	GENCODE	579	chr21	-	44881973	44898103		CCTTACATAGCCAGGGCAAAGGTGCATGACAACTCTGAGCAAGTCAAAACAACCGTCAGC	114038	intergenic							25.8004	14.2524	4.59422	3.53918
ASHGA5P016093	1.1775	up	noncoding	uc021vdo.1	LOC100506054	UCSC_knowngene	1047	chr2	+	3605975	3609340		AACTGAGTTGAGAAGGGTCCATTCAAGAATTGTGCCCACAATATACCAGGCACTTGTCCA	100506054	natural antisense	ENST00000315212	RNASEH1	ribonuclease H1 [Source:HGNC Symbol;Acc:18466]	-	3592704	3606206	228.035	173.627	7.82967	7.59394
ASHGA5P056896	1.36414	up	noncoding	TCONS_00010357	XLOC_004846	LincRNAs identified by Cabili et al	289	chr5	-	63179305	63183220		GCTCAGAAAGAGGAATGTCTTTTTGTGTGCTGATGAGCTGCCTGATGACTGTGGGCTCCT		intergenic							120.238	83.6971	6.88713	6.43913
ASHGA5P040802	1.24398	up	noncoding	TCONS_00021731	XLOC_010311	LincRNAs identified by Cabili et al	3893	chr13	+	24079514	24099623		TCTGGTGGTAGATGCTTCACTTCTTCATTTATGACTCCACATTCGTGGAAGAGAGCAAAG		intergenic							62.0478	49.9535	5.89873	5.58376
ASHGA5P028639	1.92947	up	noncoding	NR_051966	LINC00359	RefSeq	734	chr13	-	97593534	97636426		CAAGAAGTTCAGAAACTTTAACATGGCTGATGTGATAAAGTGTTGGGTCTTTCTCTGAAG	100887754	intergenic							92.5543	48.5081	6.48846	5.54025
ASHGA5P051054	1.59131	up	noncoding	uc002ydh.3	BC141903	UCSC_knowngene	222	chr20	-	61405786	61406753	NR_046224	CCACACACAGAGAGCTGCAGCCGATGCCGGCCGGTGACTTGGGACTTGGATGCTTAACAG		intergenic							33.4881	22.5388	4.97249	4.30228
ASHGA5P037487	1.14547	up	noncoding	NR_024028	LINC00112	RefSeq	525	chr21	+	43136595	43137742		TGAATCCATCAGCCCAGCAAGACAGGTGTCTCCAGCAAGTTCTGTAAAATACAACCATAG	54089	intergenic							1890.41	1357.96	10.8795	10.6835
ASHGA5P000400	1.07027	up	noncoding	chr3:31017300-31040525+	chr3:31017300-31040525	LincRNAs identified by Khalil et al	23225	chr3	+	31042296	31065521		TTCTCTGCTTGCATTAGCAGTCAGGTGGGTTCCTCAGTAGGCTTAAAGCCAATTCATGTT		intergenic							49.661	46.2942	5.56322	5.46524
ASHGA5P019877	1.08129	up	noncoding	ENST00000504516	AP005901.1	GENCODE	550	chr18	-	15316483	15325918	NR_027417	AATATTGTAGGCTGGCCACACACCACTTTTATTGGCCATAAGGAAAAGAAGTGAGCAAAT		intergenic							40.3612	37.5885	5.25156	5.13881
ASHGA5P043771	9.00539	up	noncoding	ENST00000450977	AC003984.1	GENCODE	4104	chr7	+	84161791	84204159		TTGTGGCTATCTAATAATTTGAAAGTACCATGCTCAATTCTTGTTACTGCACAGTTTCCA		intergenic							50.6918	5	5.59634	2.42556
ASHGA5P040308	1.34449	up	noncoding	ENST00000511514	CTD-2247C11.4	GENCODE	545	chr5	-	5046908	5049610		TGTCACCTGCCTGTAGACAGAATATTTAAAAACGAGAGTTCATGGTTTTAGTTGAGACTG		intergenic							258.441	171.978	8.0083	7.58124
ASHGA5P016208	1.1212	up	noncoding	ENST00000427929	AC104695.3	GENCODE	2850	chr2	-	28607275	28617539		CTTGCTCCAGGATCTGCACAAGCAGAGGCGGCACAGGGTTTGGCTTCCAGTTGGGAAATG		intronic antisense	NM_005253	FOSL2	fos-related antigen 2	+	28615778	28637516	91.2478	77.0096	6.4694	6.30435
ASHGA5P021761	1.14755	up	noncoding	ENST00000540250	RP11-173C20.1	GENCODE	1190	chr12	+	127227282	127229878	NR_038256	GGAATACTCTAGAGTCAAGGGATTGGATTGTGGATTGCATTGGTGGTTTTCCTCAGTTTC		intergenic							77.3989	64.6563	6.22155	6.023
ASHGA5P023455	1.45298	up	noncoding	ENST00000581274	RP11-370A5.1	GENCODE	381	chr18	-	20303455	20366836		AATAAATCAGAGATGGCCTGGATTCTGCCATGTAAATCAAAGAAGAGAGGGCCTAACTCA		intergenic							51.7502	36.3755	5.62847	5.08946
ASHGA5P041716	1.04334	up	noncoding	NR_026776	LOC100270746	RefSeq	954	chr6	-	26987144	26988085		TGTGGATAAGAATGAGATATTAAGGCAGAATTAGCTGGGCTTTTAATCCCAAACAGTGTT	100270746	intergenic							113.643	101.706	6.80184	6.74063
ASHGA5P054259	1.33119	up	noncoding	uc003xdg.1	BC128546	UCSC_knowngene	1219	chr8	+	23152462	23153681		CTACTTCCAGAAACCATGGTGAGAGATTTTAGACACGAGTTTTCCATGACTTCAAAGTAG		exon sense-overlapping	NM_001136108	R3HCC1	R3H and coiled-coil domain-containing protein 1	+	23145611	23153792	238.444	161.511	7.89306	7.48034
ASHGA5P023263	1.17537	up	noncoding	ENST00000576606	RP11-874J12.2	GENCODE	391	chr18	+	3594109	3597370		CAGCTACGAGATGGATATCTGAGAGCCAGCGAACTTTCTTTACCTCCTAGTATCATTTCA		intronic antisense	NM_001003809	DLGAP1	disks large-associated protein 1 isoform 2	-	3496029	3845358	547.829	396.38	9.07893	8.84581
ASHGA5P023263	1.17537	up	noncoding	ENST00000576606	RP11-874J12.2	GENCODE	391	chr18	+	3594109	3597370		CAGCTACGAGATGGATATCTGAGAGCCAGCGAACTTTCTTTACCTCCTAGTATCATTTCA		intronic antisense	NM_001242761	DLGAP1	disks large-associated protein 1 isoform 3	-	3502142	4455266	547.829	396.38	9.07893	8.84581
ASHGA5P023263	1.17537	up	noncoding	ENST00000576606	RP11-874J12.2	GENCODE	391	chr18	+	3594109	3597370		CAGCTACGAGATGGATATCTGAGAGCCAGCGAACTTTCTTTACCTCCTAGTATCATTTCA		intronic antisense	NM_001242762	DLGAP1	disks large-associated protein 1 isoform 4	-	3496029	3874767	547.829	396.38	9.07893	8.84581
ASHGA5P023263	1.17537	up	noncoding	ENST00000576606	RP11-874J12.2	GENCODE	391	chr18	+	3594109	3597370		CAGCTACGAGATGGATATCTGAGAGCCAGCGAACTTTCTTTACCTCCTAGTATCATTTCA		intronic antisense	NM_001242763	DLGAP1	disks large-associated protein 1 isoform 5	-	3496029	3874767	547.829	396.38	9.07893	8.84581
ASHGA5P023263	1.17537	up	noncoding	ENST00000576606	RP11-874J12.2	GENCODE	391	chr18	+	3594109	3597370		CAGCTACGAGATGGATATCTGAGAGCCAGCGAACTTTCTTTACCTCCTAGTATCATTTCA		intronic antisense	NM_001242764	DLGAP1	disks large-associated protein 1 isoform 6	-	3496029	3874253	547.829	396.38	9.07893	8.84581
ASHGA5P023263	1.17537	up	noncoding	ENST00000576606	RP11-874J12.2	GENCODE	391	chr18	+	3594109	3597370		CAGCTACGAGATGGATATCTGAGAGCCAGCGAACTTTCTTTACCTCCTAGTATCATTTCA		intronic antisense	NM_001242765	DLGAP1	disks large-associated protein 1 isoform 7	-	3502142	3845358	547.829	396.38	9.07893	8.84581
ASHGA5P023263	1.17537	up	noncoding	ENST00000576606	RP11-874J12.2	GENCODE	391	chr18	+	3594109	3597370		CAGCTACGAGATGGATATCTGAGAGCCAGCGAACTTTCTTTACCTCCTAGTATCATTTCA		intronic antisense	NM_001242766	DLGAP1	disks large-associated protein 1 isoform 8	-	3496029	3845358	547.829	396.38	9.07893	8.84581
ASHGA5P023263	1.17537	up	noncoding	ENST00000576606	RP11-874J12.2	GENCODE	391	chr18	+	3594109	3597370		CAGCTACGAGATGGATATCTGAGAGCCAGCGAACTTTCTTTACCTCCTAGTATCATTTCA		intronic antisense	NM_004746	DLGAP1	disks large-associated protein 1 isoform 1	-	3496029	4455266	547.829	396.38	9.07893	8.84581
ASHGA5P028502	1.08245	up	noncoding	TCONS_00010589	XLOC_005115	LincRNAs identified by Cabili et al	538	chr5	-	180634461	180644800		TTTGGAGTGTGATAAAACTACTAAAGTGCCTCGGCTCCTGGGAAATTCAAACTCTGCCGT		intergenic							237.87	194.972	7.88984	7.77554
ASHGA5P026353	1.0097	up	noncoding	BF357088R		LincRNAs identified by Khalil et al	337	chr5	-	82009427	82009752		TTCTATGATAATGACCAATTCAAGAGGTTTCTGGGTATGGGAAATTTTGCACCAGAAGGC		intergenic							5.49962	5	2.43948	2.42556
ASHGA5P030960	1.01115	up	noncoding	NR_033824	RXRG	RefSeq	803	chr1	-	165406164	165414592		GTTTCCCGTTCCTCTGACATCTTGTAAATGCTTTTTGAATTAAAGATGATAACAGGCTTT	6258	exon sense-overlapping	NM_001256570	RXRG	retinoic acid receptor RXR-gamma isoform c	-	165370158	165414592	552.925	460.379	9.0923	9.0763
ASHGA5P030960	1.01115	up	noncoding	NR_033824	RXRG	RefSeq	803	chr1	-	165406164	165414592		GTTTCCCGTTCCTCTGACATCTTGTAAATGCTTTTTGAATTAAAGATGATAACAGGCTTT	6258	exon sense-overlapping	NM_006917	RXRG	retinoic acid receptor RXR-gamma isoform a	-	165370158	165414592	552.925	460.379	9.0923	9.0763
ASHGA5P057543	1.0328	up	noncoding	TCONS_00018649	XLOC_009000	LincRNAs identified by Cabili et al	1048	chr10	-	133730127	133733387		GCGTGAGGTCCCTACACTGTGTCATCCTACCCGCCTGAGGTCCCTACAAACACTGTCATT		intergenic							1477.43	1168.78	10.5105	10.464
ASHGA5P056394	1.26788	up	noncoding	TCONS_00003868	XLOC_001667	LincRNAs identified by Cabili et al	610	chr2	+	130000718	130046716		AAGTAGACAGATGCACTCAACCACAGATCCTACTGACATGAAGGTTTATGCACCTTGAGG		intergenic							16.9829	15.016	3.97348	3.63106
ASHGA5P036481	1.0474	up	noncoding	ENST00000446532	AC010980.2	GENCODE	402	chr2	+	223185581	223186441	ENST00000429475	TTTAAAGGAGGACGAAGACAACAGATTCATAGCTGGGTCTTGCTGTTTTCCTGACGCTGA		intergenic							60.7614	56.7795	5.86835	5.80154
ASHGA5P034167	1.23031	up	noncoding	ENST00000433059	AC002398.5	GENCODE	2167	chr19	-	36279777	36288787		GCTCCCAGGAGTAACTCCTGCCTTGGTGCCTCCCCAAAAGGAAATAGAATGATAAAGTGC		intergenic							6915.89	4643.07	12.7542	12.4551
ASHGA5P053562	1.22916	up	noncoding	uc003ysl.3	PVT1	UCSC_knowngene	1738	chr8	+	128902834	129113499	ENST00000504719, ENST00000517790, ENST00000518528, ENST00000521122, ENST00000522963, ENST00000523068, ENST00000523427, uc010mdp.1, uc010mdq.3	AAAGATGCCCCTCAAGATGGCTGTGCCTGTCAGCTGCATGGAGCTTCGTTCAAGTATTTT	5820	intronic antisense	ENST00000539634	TMEM75	transmembrane protein 75 [Source:HGNC Symbol;Acc:32295]	-	128959125	128960591	477.566	333.247	8.88233	8.58466
ASHGA5P045727	1.01568	up	noncoding	uc004acc.4	LOC554249	UCSC_knowngene	1355	chr9	+	42018943	42020413	ENST00000446626, NR_015363, uc004adp.4, uc010mmq.1	CCTTTGACCTCATTATGGTCCTTTCTAGATCAAATGCTGTTTTCCATGACTGTCTCTGTT		intergenic							1463.5	1176.14	10.4975	10.4751
ASHGA5P058578	1.97855	up	noncoding	uc010mnp.2	LOC100132352	UCSC_knowngene	928	chr9	+	68726540	68767301	uc010mnq.2	CTTTCAAAATGGTGCCTGTGCAGCAGTATTCACTGTGATAGGAAGTGAGAAGCAGTCTGA	100132352	intergenic							129.295	63.9604	6.98884	6.0044
ASHGA5P044594	1.16923	up	noncoding	ENST00000524499	CTD-3065J16.9	GENCODE	1264	chr8	-	145132904	145134168		GTATGTCTGTTTATCTCTTGCCACTTAACCTCAGCGGCTTCAAATAATAAAAATCATTCT		natural antisense	NM_019037	EXOSC4	exosome complex component RRP41	+	145133521	145135551	1079.65	770.8	10.07	9.84442
ASHGA5P023776	1.04792	up	noncoding	HMlincRNA316+	HMlincRNA316	LincRNAs identified by Khalil et al	6941	chr14	+	34386050	34392991		GGAAGGAATAAACAAAGCCTTGGAGGTCAGATCTTTTGGCATATTGACTAAAATGAAAAA		intergenic							46.5333	44.3071	5.46334	5.39581
ASHGA5P056507	1.26647	up	noncoding	TCONS_00005102	XLOC_002010	LincRNAs identified by Cabili et al	617	chr2	-	20733946	20739861	TCONS_00005103	TGTGCCTCGCATGTACTGTGTTTGTCGGCCCCTCGGGCCTCATGTTGTTGCTCTGGCACC		intergenic							171.094	124.105	7.4022	7.06139
ASHGA5P013591	1.25985	up	noncoding	ENST00000430602	PMS2P3	GENCODE	1005	chr7	-	75137071	75157166	ENST00000422064, ENST00000533167, NR_028059, uc003udq.3	ACATAGTCCAGTACAGAACCTGCTAAGGCCATCAAACCTATTGATCGGAAGTCAGTCCAT	5387	intergenic							705.495	472.813	9.45049	9.11723
ASHGA5P046353	1.39443	up	noncoding	ENST00000435597	RP11-1114A5.4	GENCODE	3018	chrX	-	135923089	135929956		CAGTGCTGAGAAATATGAGGTTCTGACCTAGCCAGAGTGGAGAGAACTTTTTAACATCAT		intergenic							81.5957	57.2995	6.2972	5.81752
ASHGA5P053779	1.28894	up	noncoding	uc004bbl.1	AK094413	UCSC_knowngene	1691	chr9	-	104235441	104237132		GTATTGCATAGACATGTCTGTGAAAATAAAAGCACCCATTTTGCTAAGGCTTTCTGAGAA		exon sense-overlapping	ENST00000374847	TMEM246	transmembrane protein 246 [Source:HGNC Symbol;Acc:28180]	-	104235452	104249399	60.8334	47.383	5.87004	5.50385
ASHGA5P053779	1.28894	up	noncoding	uc004bbl.1	AK094413	UCSC_knowngene	1691	chr9	-	104235441	104237132		GTATTGCATAGACATGTCTGTGAAAATAAAAGCACCCATTTTGCTAAGGCTTTCTGAGAA		exon sense-overlapping	ENST00000374848	TMEM246	transmembrane protein 246 [Source:HGNC Symbol;Acc:28180]	-	104235452	104249475	60.8334	47.383	5.87004	5.50385
ASHGA5P053779	1.28894	up	noncoding	uc004bbl.1	AK094413	UCSC_knowngene	1691	chr9	-	104235441	104237132		GTATTGCATAGACATGTCTGTGAAAATAAAAGCACCCATTTTGCTAAGGCTTTCTGAGAA		exon sense-overlapping	ENST00000374851	TMEM246	transmembrane protein 246 [Source:HGNC Symbol;Acc:28180]	-	104235452	104295730	60.8334	47.383	5.87004	5.50385
ASHGA5P039565	2.08415	up	noncoding	uc003ice.3	BC035733	UCSC_knowngene	1511	chr4	-	119585242	119605621		TGCCTCATTCCAGAAGGTCTTCAAGAAGAAAATGTTGTGGTGATAACAAACATAACTGAT		bidirectional	NM_020961	METTL14	methyltransferase-like protein 14	+	119606573	119632077	198.537	91.1367	7.6253	6.56583
ASHGA5P028272	1.9216	up	noncoding	TCONS_00009935	XLOC_004363	LincRNAs identified by Cabili et al	1961	chr5	+	42994638	42997566		ATTTCCCGGACACAGATGGTTTTTGGCCCCTGAAGAACTCTTTAATCCCTGCGTTTTGTA		intergenic							1685.67	729.676	10.7087	9.76642
ASHGA5P044190	1.22173	up	noncoding	NR_026765	LINC00589	RefSeq	1413	chr8	-	29578775	29605625		CTGAACACACCATGGCTGCTGTCGCCCTTTTCATTAAAATGATTGAAAATGTATTTCTAA	619351	intergenic							1318.28	888.986	10.3511	10.0622
ASHGA5P021593	1.19601	up	noncoding	ENST00000535922	AP003419.16	GENCODE	470	chr11	-	67198837	67202870		GGAGGTAGAGGTAGAGTTTGCCACCAGTCTGGAAGGCATAGGCCAGTTCCACAATAAAGG		natural antisense	NM_003952	RPS6KB2	ribosomal protein S6 kinase beta-2	+	67195934	67202879	72.0366	58.5891	6.11313	5.8549
ASHGA5P050746	3.20257	up	noncoding	ENST00000430904	AC020571.3	GENCODE	768	chr2	+	197124747	197128283		TCGCTTCTTGAGTCACAAGGATGATAGGATGAGAAAAAGAAAGGACAAAGGCACCAGAGG		intronic antisense	NM_020760	HECW2	E3 ubiquitin-protein ligase HECW2	-	197063976	197457335	31.0799	11.2233	4.8596	3.18037
ASHGA5P058791	3.65998	up	noncoding	uc.283+	uc.283	UCR	277	chr10	+	50604756	50605033		TTATGCACCACTGAAAATAAAGTTGGTATTATGACCCACTCAAGATGCATCAGAAGATGC		intergenic							117.365	33.9935	6.84809	4.97626
ASHGA5P027634	4.66962	up	noncoding	ENST00000561881	RP11-490G2.2	GENCODE	1810	chr1	-	98432560	98434370		CCATAGTCTTCAGACAAAAGGGAGAGATATCTTTTCAGACAATCTTTGAACAATCCTATA		intergenic							26.755	5	4.64886	2.42556
ASHGA5P030671	1.29129	up	noncoding	ENST00000567704	RP11-114H24.1	pseudogene	4801	chr15	+	78187025	78197016	ENST00000308508	ACATCATATTCTCAGTGAAGAGCCCGCCGAGTGCCAGCTACCTGGTGATGGTGTCACGTG									351.736	238.008	8.44719	8.07838
ASHGA5P047302	1.81254	up	noncoding	ENST00000434458	RP13-16H11.1	GENCODE	880	chr10	+	26937028	26942383	ENST00000423917, NR_026794	CAACAGGCACGAAGCATCAATGTTCACAAGCAGCAAATGAATAAAAGTTAAACGTTCTTC		intergenic							48.5831	28.2536	5.52935	4.67134
ASHGA5P037370	1.59773	up	noncoding	ENST00000397787	COL18A1-AS1	GENCODE	3425	chr21	-	46839630	46844955		TTAAACTGGCCAGTAAGGGCTCCAACTCAGAACCACGGAGTCTGCAGGACGGAACTGCCT	378832	intronic antisense	NM_130445	COL18A1	collagen alpha-1(XVIII) chain isoform 2 precursor	+	46825096	46933634	26.9472	18.5994	4.66034	3.98432
ASHGA5P046004	1.68225	up	noncoding	ENST00000455074	RP11-483H20.4	GENCODE	470	chr9	+	132402754	132403561		ATATTGATGAAGAAAGCCTACGTTTCCACCAGAGTCCCTGGATGGCGAGACTCATCATTA		natural antisense	NM_001202403	ASB6	ankyrin repeat and SOCS box protein 6 isoform 3	-	132396882	132404448	291.824	157.124	8.18906	7.43867
ASHGA5P046004	1.68225	up	noncoding	ENST00000455074	RP11-483H20.4	GENCODE	470	chr9	+	132402754	132403561		ATATTGATGAAGAAAGCCTACGTTTCCACCAGAGTCCCTGGATGGCGAGACTCATCATTA		natural antisense	NM_017873	ASB6	ankyrin repeat and SOCS box protein 6 isoform 1	-	132396882	132404448	291.824	157.124	8.18906	7.43867
ASHGA5P046004	1.68225	up	noncoding	ENST00000455074	RP11-483H20.4	GENCODE	470	chr9	+	132402754	132403561		ATATTGATGAAGAAAGCCTACGTTTCCACCAGAGTCCCTGGATGGCGAGACTCATCATTA		natural antisense	NM_177999	ASB6	ankyrin repeat and SOCS box protein 6 isoform 2	-	132396882	132404448	291.824	157.124	8.18906	7.43867
ASHGA5P022016	1.07356	up	noncoding	uc002nca.3	LOC126536	UCSC_knowngene	1166	chr19	+	16132697	16138270	uc010xow.2	GGCAGGAGCCCTGGCCCAGAGCCAGAACCAAGAGTCCAGCCAGAGGCGGCTAGAGCATCA	126536	intron sense-overlapping	ENST00000397365	AC004790.1		+	16124066	16152945	31.9578	30.5435	4.90035	4.79795
ASHGA5P054767	1.51412	up	noncoding	ENST00000528701	RP11-17A1.3	GENCODE	627	chr11	+	22850957	22942196	ENST00000525963	ATGAAGATCCGGCGCAGCTAAAGTCAGTGGAAGGTAGAAAGACGCCACAGCCGCCTTTCG		intronic antisense	NM_001195637	LOC100500938	uncharacterized protein LOC100500938	-	22868467	22881972	104.932	66.9389	6.67615	6.07767
ASHGA5P054767	1.51412	up	noncoding	ENST00000528701	RP11-17A1.3	GENCODE	627	chr11	+	22850957	22942196	ENST00000525963	ATGAAGATCCGGCGCAGCTAAAGTCAGTGGAAGGTAGAAAGACGCCACAGCCGCCTTTCG		intronic antisense	NM_148893	SVIP	small VCP/p97-interacting protein	-	22843597	22851382	104.932	66.9389	6.67615	6.07767
ASHGA5P027643	1.25076	up	noncoding	ENST00000437156	RP11-5P18.5	GENCODE	466	chr1	-	16332654	16333166		TTTCAGATGCCCCTTAGCGGATCTAATGATGTTTCCTTGGCTCAAGCACAAAAGACTCCT		natural antisense	NM_178840	C1orf64	uncharacterized protein C1orf64	+	16330730	16333184	170.361	124.869	7.39613	7.07332
ASHGA5P043094	1.24627	up	noncoding	NR_038378	LOC441242	RefSeq	1977	chr7	-	65111923	65235797		GTGTTAACGACCACACATTTTACACAAATGCCATGAATCCTTAAGGTGTTCCAATTTATA	441242	intergenic							59.9836	48.2568	5.84755	5.52994
ASHGA5P032477	1.05058	up	noncoding	ENST00000575126	RP11-63A1.2	GENCODE	494	chr17	-	44987107	44988878		TAAATTTAGGCCTCACTGACTCCTACCTTGGGCATGTAAGCACCAGTTGGATCAGATACA		intergenic							198.837	169.384	7.62843	7.55725
ASHGA5P043741	1.01504	up	noncoding	ENST00000404291	STAG3L1	GENCODE	496	chr7	+	74995622	75024657	ENST00000448772, ENST00000456374, NM_012447, NR_040582, NR_040583, NR_040584, uc003ucx.3	AGCCCAGGTGCCCAGAGGACTTTCTTCCAGCTTCTGCTGTCCTTCTTTGTGGAGAGCAAG		exon sense-overlapping	ENST00000450434	TRIM73	tripartite motif containing 73 [Source:HGNC Symbol;Acc:18162]	+	75024336	75034896	1449.69	1167.18	10.4838	10.4623
ASHGA5P018281	1.45068	up	noncoding	ENST00000451564	TLR8-AS1	GENCODE	1349	chrX	-	12920935	12926452	NR_030727	ACATTGCTTCATCTTTGTTCCACAAGTTTCTGAGACAGCACCGACTTCACACATTCCTGG	349408	intronic antisense	NM_138636	TLR8	toll-like receptor 8 precursor	+	12924738	12941288	109.167	72.4073	6.74034	6.20361
ASHGA5P058369	1.17173	up	noncoding	uc002cdr.3	WASH3P	UCSC_knowngene	849	chr15	+	102514397	102516808	NR_024540, uc001aac.4, uc001aae.4, uc009viq.3, uc009vir.3, uc009vis.3, uc009vit.3, uc009viu.3, uc009viv.2, uc009viw.2, uc009vix.2, uc009vjd.2	TCTCCTTCAGGGAGCTCCCAGGGAAGTGGTTGACCCCTCCGGTGGCCGGGCCACTCTGCT	374666	intergenic							117.11	94.0453	6.8451	6.61645
ASHGA5P023463	1.22466	up	noncoding	ENST00000581489	RP13-516M14.4	GENCODE	1810	chr17	-	80247921	80250690		GCCGTACCAGTGATGCAAGATGGTCCTTTCTGAGCAGAGCTCCCCTCGCTCAGTGCTCCT		intergenic							781.14	539.482	9.60318	9.3108
ASHGA5P058378	1.31246	up	noncoding	uc002iil.3	BC045769	UCSC_knowngene	1556	chr17	-	43295636	43299132		GCCAGAGAAGAGCCACTGACAAGACTTTAAGCAAGAGACGGAGAGTTAACATCTAATCTG		bidirectional	NM_005892	FMNL1	formin-like protein 1	+	43299291	43324683	24.2507	20.1062	4.50277	4.1105
ASHGA5P039787	1.54911	up	noncoding	ENST00000514763	RP11-323F5.2	GENCODE	531	chr4	+	4544144	4546787		GTTTACTGTGAAAATTAAGTGAGCTGACGCGTGCTGTGTTTTGATGTTGCTTGGCTCCTA		bidirectional	NM_016930	STX18	syntaxin-18	-	4420695	4543775	100.885	63.2566	6.61584	5.9844
ASHGA5P035012	1.20235	up	noncoding	ENST00000413669	AC009236.1	GENCODE	343	chr2	-	45401480	45402350	NR_033831	GTTGTCTTCCCTTCCTAGAAGCAATGCTTCTATGTTCTCATTTGATGTTGAATAAAACAT		intergenic							2683.23	1829.53	11.3778	11.112
ASHGA5P017207	1.39178	up	noncoding	ENST00000438905	RP11-748L13.1	pseudogene	707	chr10	+	27551885	27577753	ENST00000305242	TTACAAAGACTATGCTCAGCAAAAGAAATCCAAGAGGACAAACACACAGGAAAACTTGAA									31.3307	23.8156	4.87129	4.39437
ASHGA5P031562	1.04687	up	noncoding	ENST00000573856	CTA-972D3.2	GENCODE	536	chr16	+	15978885	15980015		TGGGAAATCAATGTAGTTTAACACTGTTCTGCACCCTGCCAAAGGCACCAAGTAAGTACA		intronic antisense	NM_144600	FOPNL	lisH domain-containing protein FOPNL	-	15959576	15982447	138.726	121.701	7.09611	7.03002
ASHGA5P044841	1.06525	up	noncoding	ENST00000531077	RP11-27P7.1	GENCODE	433	chr8	+	60962145	60987274		AGGGAGTGGAAACTTCACTTTCAACATCATCAGCCAACTTCCCTCCCATTACAATTCTAT		intergenic							1393.95	1065.05	10.4232	10.332
ASHGA5P026087	1.64648	up	noncoding	TCONS_00013804	XLOC_006444	LincRNAs identified by Cabili et al	291	chr7	-	53448225	53486571		GAACAACAGAGAAGAACCTATTATTGGGCCACCTATCAAGCAAAAAGAAAATACAGCAAT		intergenic							39.4489	25.3422	5.2161	4.49671
ASHGA5P043292	1.54481	up	noncoding	ENST00000421965	AC006159.4	GENCODE	692	chr7	-	116203647	116211288		CTTTAAATCCACTCACACCCAACTTTTAAACAAAAAGTAGCAGTATATCCTACACACGAT		intergenic							616.522	341.672	9.25108	8.62365
ASHGA5P045692	1.34223	up	noncoding	ENST00000434627	RP11-195F19.9	GENCODE	665	chr9	+	34665661	34681295		GGTATTACTACTACTCAGCAAGATTCTGGTTTTACTTCTCATCTTGGGAGTTACCATCAA		natural antisense	ENST00000416454	RP11-195F19.5	HCG2040265, isoform CRA_a; Uncharacterized protein; cDNA FLJ50015 [Source:UniProtKB/TrEMBL;Acc:B7Z3J9]	-	34665024	34666025	23.7753	19.4398	4.47923	4.0546
ASHGA5P045692	1.34223	up	noncoding	ENST00000434627	RP11-195F19.9	GENCODE	665	chr9	+	34665661	34681295		GGTATTACTACTACTCAGCAAGATTCTGGTTTTACTTCTCATCTTGGGAGTTACCATCAA		natural antisense	ENST00000421828	RP11-195F19.5	HCG2040265, isoform CRA_a; Uncharacterized protein; cDNA FLJ50015 [Source:UniProtKB/TrEMBL;Acc:B7Z3J9]	-	34664159	34666046	23.7753	19.4398	4.47923	4.0546
ASHGA5P045692	1.34223	up	noncoding	ENST00000434627	RP11-195F19.9	GENCODE	665	chr9	+	34665661	34681295		GGTATTACTACTACTCAGCAAGATTCTGGTTTTACTTCTCATCTTGGGAGTTACCATCAA		natural antisense	ENST00000423809	RP11-195F19.5	HCG2040265, isoform CRA_a; Uncharacterized protein; cDNA FLJ50015 [Source:UniProtKB/TrEMBL;Acc:B7Z3J9]	-	34665024	34666109	23.7753	19.4398	4.47923	4.0546
ASHGA5P045692	1.34223	up	noncoding	ENST00000434627	RP11-195F19.9	GENCODE	665	chr9	+	34665661	34681295		GGTATTACTACTACTCAGCAAGATTCTGGTTTTACTTCTCATCTTGGGAGTTACCATCAA		natural antisense	ENST00000544078	RP11-195F19.5	HCG2040265, isoform CRA_a; Uncharacterized protein; cDNA FLJ50015 [Source:UniProtKB/TrEMBL;Acc:B7Z3J9]	-	34665028	34666025	23.7753	19.4398	4.47923	4.0546
ASHGA5P036606	2.8383	up	noncoding	TCONS_00026420	XLOC_012767	LincRNAs identified by Cabili et al	271	chr18	-	11159317	11159699		ATACATAAAAGCCATCATGAGGAAGGATGTCAGTGGCTCACAATGAAAGGACGAAGGGAC		intergenic							78.8783	29.5833	6.24994	4.74491
ASHGA5P020209	1.20147	up	noncoding	uc003gnf.3	MGC4836	UCSC_knowngene	2855	chr4	-	14473677	14889793		ATGGGAACTCTGGCCAAGACTCTACTACCCAGACACCAAAAGAAGAAATGATTAACCCTG		intergenic							178.697	135.706	7.46722	7.20242
ASHGA5P042556	1.24081	up	noncoding	NR_037157	BVES-AS1	RefSeq	1725	chr6	+	105585561	105617819		GCAATATCCAGCTGTCATCTTCTTGATCCTCATATGCTACTACTAGCATCTAGCATTTAC	154442	intronic antisense	NM_022361	POPDC3	popeye domain-containing protein 3	-	105605774	105627858	122.29	93.0749	6.90999	6.59871
ASHGA5P038628	2.11477	up	noncoding	ENST00000415869	RP11-513G11.4	GENCODE	910	chr3	-	193920804	193967942		TGATTCATATTCTTCTACTTGACCCTGACTGTCAGGACCAACAACACCAAATAACACCAA		intergenic							51.1759	25.8461	5.60997	4.52947
ASHGA5P046072	1.23311	up	noncoding	uc011mfi.2	OK/SW-cl.16	UCSC_knowngene	1622	chrM	+	7586	9208		TCTACCCCCTCTAGAGCCCACTGTAAAGCTAACTTAGCATTAACCTTTTAAGTTAAAGAT		intergenic							165891	131212	17.3114	17.009
ASHGA5P031414	1.06566	up	noncoding	ENST00000554623	RP11-566K11.4	GENCODE	985	chr16	-	89986234	89989070		AGAGGAAGAAAATGCCCAGCAGGATGGTGAGGGTGACAGCGCCTTTAAGGCCAAAGCCCT		intronic antisense	NM_001197181	TUBB3	tubulin beta-3 chain isoform 2	+	89988416	90002505	34.6268	33.1275	5.02516	4.93342
ASHGA5P031414	1.06566	up	noncoding	ENST00000554623	RP11-566K11.4	GENCODE	985	chr16	-	89986234	89989070		AGAGGAAGAAAATGCCCAGCAGGATGGTGAGGGTGACAGCGCCTTTAAGGCCAAAGCCCT		natural antisense	NM_002386	MC1R	melanocyte-stimulating hormone receptor	+	89984286	89987385	34.6268	33.1275	5.02516	4.93342
ASHGA5P036424	1.12706	up	noncoding	ENST00000414756	AC012462.3	GENCODE	391	chr2	+	216341389	216344971		CTGACATACAGCTGCAGAGACAGACACTGTATTGCCTCGGGGAGAACTCCAGCCCCAAAG		intergenic							89.5874	75.2231	6.43848	6.26592
ASHGA5P006991	1.49834	up	noncoding	NR_036659	ZNFX1-AS1	RefSeq	516	chr20	+	47895178	47905795	ENST00000428008	TTTGTGTGTGGTTAGAGCAGCCAGCGGGTACAGAATGGATTTTGGAAGAGGGAGTCACCA	441951	bidirectional	NM_021035	ZNFX1	NFX1-type zinc finger-containing protein 1	-	47862438	47894756	3269.25	1786.41	11.6618	11.0784
ASHGA5P053309	1.0362	up	noncoding	ENST00000467614	RP11-286H14.4	pseudogene	1200	chr7	+	128766571	128767771	NR_002144	GCGGTCCGAGGTGAAAGAAGCGGATTTTGCCTGCTAGTTGTGTAAAACCCTGGGGCTGAA									3742.65	2961.16	11.8501	11.7988
ASHGA5P017803	1.01363	up	noncoding	ENST00000445984	RP5-907D15.2	GENCODE	566	chr20	+	57090554	57098858		TGAGAAGTTGAAGGTCACACAGCTGAAGCAACTTAGCCGTCTCGCCTTGCGGCCTGGAAC		bidirectional	NM_153360	APCDD1L	protein APCDD1-like precursor	-	57034425	57089949	1486.1	1194.64	10.519	10.4994
ASHGA5P056986	1.01599	up	noncoding	TCONS_00011810	XLOC_005283	LincRNAs identified by Cabili et al	304	chr6	+	39916123	39920971		ACAATGTCCTTTCTATGCACCTTGGGAGAAGAAAGAGAATCACTGCTCCATGCAACTATT		intergenic							67.9958	64.1317	6.03164	6.00876
ASHGA5P050857	2.24314	up	noncoding	ENST00000450901	AC114812.5	GENCODE	912	chr2	-	234663068	234663980	ENST00000421868, NR_037695	GGCTCTTTGGCAGTCCAGCATAGTGGACTACTACGAGGTGCTGGGAGTACCCCGGTAGGC		intronic antisense	NM_001072	UGT1A6	UDP-glucuronosyltransferase 1-6 isoform 1 precursor	+	234601511	234681951	147.279	64.6282	7.18791	6.02239
ASHGA5P050857	2.24314	up	noncoding	ENST00000450901	AC114812.5	GENCODE	912	chr2	-	234663068	234663980	ENST00000421868, NR_037695	GGCTCTTTGGCAGTCCAGCATAGTGGACTACTACGAGGTGCTGGGAGTACCCCGGTAGGC		intronic antisense	NM_007120	UGT1A4	UDP-glucuronosyltransferase 1-4 precursor	+	234627437	234681945	147.279	64.6282	7.18791	6.02239
ASHGA5P050857	2.24314	up	noncoding	ENST00000450901	AC114812.5	GENCODE	912	chr2	-	234663068	234663980	ENST00000421868, NR_037695	GGCTCTTTGGCAGTCCAGCATAGTGGACTACTACGAGGTGCTGGGAGTACCCCGGTAGGC		intronic antisense	NM_019075	UGT1A10	UDP-glucuronosyltransferase 1-10 precursor	+	234545122	234681951	147.279	64.6282	7.18791	6.02239
ASHGA5P050857	2.24314	up	noncoding	ENST00000450901	AC114812.5	GENCODE	912	chr2	-	234663068	234663980	ENST00000421868, NR_037695	GGCTCTTTGGCAGTCCAGCATAGTGGACTACTACGAGGTGCTGGGAGTACCCCGGTAGGC		intronic antisense	NM_019076	UGT1A8	UDP-glucuronosyltransferase 1-8 precursor	+	234526290	234681945	147.279	64.6282	7.18791	6.02239
ASHGA5P050857	2.24314	up	noncoding	ENST00000450901	AC114812.5	GENCODE	912	chr2	-	234663068	234663980	ENST00000421868, NR_037695	GGCTCTTTGGCAGTCCAGCATAGTGGACTACTACGAGGTGCTGGGAGTACCCCGGTAGGC		intronic antisense	NM_019077	UGT1A7	UDP-glucuronosyltransferase 1-7 precursor	+	234590583	234681945	147.279	64.6282	7.18791	6.02239
ASHGA5P050857	2.24314	up	noncoding	ENST00000450901	AC114812.5	GENCODE	912	chr2	-	234663068	234663980	ENST00000421868, NR_037695	GGCTCTTTGGCAGTCCAGCATAGTGGACTACTACGAGGTGCTGGGAGTACCCCGGTAGGC		intronic antisense	NM_019078	UGT1A5	UDP-glucuronosyltransferase 1-5 precursor	+	234621637	234681945	147.279	64.6282	7.18791	6.02239
ASHGA5P050857	2.24314	up	noncoding	ENST00000450901	AC114812.5	GENCODE	912	chr2	-	234663068	234663980	ENST00000421868, NR_037695	GGCTCTTTGGCAGTCCAGCATAGTGGACTACTACGAGGTGCTGGGAGTACCCCGGTAGGC		intronic antisense	NM_019093	UGT1A3	UDP-glucuronosyltransferase 1-3 precursor	+	234637772	234681945	147.279	64.6282	7.18791	6.02239
ASHGA5P050857	2.24314	up	noncoding	ENST00000450901	AC114812.5	GENCODE	912	chr2	-	234663068	234663980	ENST00000421868, NR_037695	GGCTCTTTGGCAGTCCAGCATAGTGGACTACTACGAGGTGCTGGGAGTACCCCGGTAGGC		intronic antisense	NM_021027	UGT1A9	UDP-glucuronosyltransferase 1-9 precursor	+	234580543	234681951	147.279	64.6282	7.18791	6.02239
ASHGA5P050857	2.24314	up	noncoding	ENST00000450901	AC114812.5	GENCODE	912	chr2	-	234663068	234663980	ENST00000421868, NR_037695	GGCTCTTTGGCAGTCCAGCATAGTGGACTACTACGAGGTGCTGGGAGTACCCCGGTAGGC		intronic antisense	NM_205862	UGT1A6	UDP-glucuronosyltransferase 1-6 isoform 2	+	234600320	234681945	147.279	64.6282	7.18791	6.02239
ASHGA5P031576	1.00143	up	noncoding	TCONS_00006668	XLOC_003264	LincRNAs identified by Cabili et al	811	chr3	-	135551401	135559458		GAAAAGTTGCAATCTCTTCAGACCTCTATCATCAAAAAGGAGGCCCAGTGCATTATTGCA		intergenic							162.559	146.379	7.32658	7.32451
ASHGA5P038059	1.0515	up	noncoding	ENST00000449941	RP13-455A7.1	GENCODE	219	chr22	+	48256419	48257811		TATGCCAGCCCACACCACAGTCTTGGTCATCACTCCTGTTTCCATGGTGTTAACAGCAGC		intergenic							857.497	682.656	9.73342	9.66098
ASHGA5P045272	1.49904	up	noncoding	NR_047671	BANCR	RefSeq	688	chr9	-	71911596	71921972		GCACCACATTGATTTACTGCACCAGGCTTTCTTCATTGTGATGATGTTCTCTCTCTTTTC	100885775	intergenic							1249.13	694.367	10.27	9.68592
ASHGA5P036441	1.06152	up	noncoding	ENST00000564299	RP11-574O16.1	GENCODE	585	chr2	+	217860628	217861213		CAGAGACAGCATCCTATGGCATGGTGATCCAAAACAAGTACACCTCTACCTTTTCCCTTT		intergenic							245.914	204.788	7.93786	7.85173
ASHGA5P022041	1.68415	up	noncoding	ENST00000553197	RP11-121G22.3	GENCODE	875	chr12	+	81672979	81706068	ENST00000547762, ENST00000549161, ENST00000550302, ENST00000552534	CATTTCTGAGGTCAGAGGCAGTGCAGCTTGTGTTACAACTCAAAAGAGTAATACTCTGAA		intronic antisense	NM_001220473	PPFIA2	liprin-alpha-2 isoform b	-	81652044	82152474	152.65	86.5036	7.23754	6.48551
ASHGA5P022041	1.68415	up	noncoding	ENST00000553197	RP11-121G22.3	GENCODE	875	chr12	+	81672979	81706068	ENST00000547762, ENST00000549161, ENST00000550302, ENST00000552534	CATTTCTGAGGTCAGAGGCAGTGCAGCTTGTGTTACAACTCAAAAGAGTAATACTCTGAA		intronic antisense	NM_001220474	PPFIA2	liprin-alpha-2 isoform c	-	81652044	82152474	152.65	86.5036	7.23754	6.48551
ASHGA5P022041	1.68415	up	noncoding	ENST00000553197	RP11-121G22.3	GENCODE	875	chr12	+	81672979	81706068	ENST00000547762, ENST00000549161, ENST00000550302, ENST00000552534	CATTTCTGAGGTCAGAGGCAGTGCAGCTTGTGTTACAACTCAAAAGAGTAATACTCTGAA		intronic antisense	NM_001220475	PPFIA2	liprin-alpha-2 isoform d	-	81652044	82152286	152.65	86.5036	7.23754	6.48551
ASHGA5P022041	1.68415	up	noncoding	ENST00000553197	RP11-121G22.3	GENCODE	875	chr12	+	81672979	81706068	ENST00000547762, ENST00000549161, ENST00000550302, ENST00000552534	CATTTCTGAGGTCAGAGGCAGTGCAGCTTGTGTTACAACTCAAAAGAGTAATACTCTGAA		intronic antisense	NM_001220476	PPFIA2	liprin-alpha-2 isoform e	-	81652044	82152286	152.65	86.5036	7.23754	6.48551
ASHGA5P022041	1.68415	up	noncoding	ENST00000553197	RP11-121G22.3	GENCODE	875	chr12	+	81672979	81706068	ENST00000547762, ENST00000549161, ENST00000550302, ENST00000552534	CATTTCTGAGGTCAGAGGCAGTGCAGCTTGTGTTACAACTCAAAAGAGTAATACTCTGAA		intronic antisense	NM_001220477	PPFIA2	liprin-alpha-2 isoform f	-	81652044	81992150	152.65	86.5036	7.23754	6.48551
ASHGA5P022041	1.68415	up	noncoding	ENST00000553197	RP11-121G22.3	GENCODE	875	chr12	+	81672979	81706068	ENST00000547762, ENST00000549161, ENST00000550302, ENST00000552534	CATTTCTGAGGTCAGAGGCAGTGCAGCTTGTGTTACAACTCAAAAGAGTAATACTCTGAA		intronic antisense	NM_001220478	PPFIA2	liprin-alpha-2 isoform g	-	81652044	81992150	152.65	86.5036	7.23754	6.48551
ASHGA5P022041	1.68415	up	noncoding	ENST00000553197	RP11-121G22.3	GENCODE	875	chr12	+	81672979	81706068	ENST00000547762, ENST00000549161, ENST00000550302, ENST00000552534	CATTTCTGAGGTCAGAGGCAGTGCAGCTTGTGTTACAACTCAAAAGAGTAATACTCTGAA		intronic antisense	NM_001220479	PPFIA2	liprin-alpha-2 isoform h	-	81652044	81763193	152.65	86.5036	7.23754	6.48551
ASHGA5P022041	1.68415	up	noncoding	ENST00000553197	RP11-121G22.3	GENCODE	875	chr12	+	81672979	81706068	ENST00000547762, ENST00000549161, ENST00000550302, ENST00000552534	CATTTCTGAGGTCAGAGGCAGTGCAGCTTGTGTTACAACTCAAAAGAGTAATACTCTGAA		intronic antisense	NM_001220480	PPFIA2	liprin-alpha-2 isoform i	-	81652044	81763193	152.65	86.5036	7.23754	6.48551
ASHGA5P022041	1.68415	up	noncoding	ENST00000553197	RP11-121G22.3	GENCODE	875	chr12	+	81672979	81706068	ENST00000547762, ENST00000549161, ENST00000550302, ENST00000552534	CATTTCTGAGGTCAGAGGCAGTGCAGCTTGTGTTACAACTCAAAAGAGTAATACTCTGAA		intronic antisense	NM_003625	PPFIA2	liprin-alpha-2 isoform a	-	81652044	82153109	152.65	86.5036	7.23754	6.48551
ASHGA5P042497	1.15544	up	noncoding	uc003pgq.3	AL832252	UCSC_knowngene	3360	chr6	+	73977773	74001061		CAGATAGGACTAAGCCTTTTTCATGCCTGTTTTTTGTAGAGTTTGTAGTTTAGGAATCAT		intronic antisense	NM_001251874	KHDC1	KH homology domain-containing protein 1 isoform 1	-	73951037	74019938	94.9116	77.6824	6.52843	6.31998
ASHGA5P026596	1.33216	up	noncoding	ENST00000420659	RP11-5P4.1	GENCODE	445	chr1	-	63466167	63478142		AAGGGATCTTTCAAGAGCCTCAAAAGCAGGACTACTTCATGAGCCAACTCGTAGTGACAA		intergenic							6.83526	5	2.83932	2.42556
ASHGA5P016625	1.39453	up	noncoding	ENST00000432334	RP1-122P22.2	GENCODE	287	chr20	+	19738351	19780320		TTGTAACAGGATGGAGACGAGAGATCTGGACTTCTGAACATCTACCGGAAAAGATAAAAT		intergenic							58.3467	42.4549	5.80756	5.32778
ASHGA5P052358	1.8853	up	noncoding	NR_040093	STARD4-AS1	RefSeq	5525	chr5	+	110847923	111075423		GCCAGTTTGACTAGATGTAAAGTACTTGGATTAAAGTGATAATCTTACTTTGTGGCCTAT	100505678	natural antisense	NM_001142474	NREP	neuronal regeneration-related protein isoform b	-	111064999	111312628	38.1338	21.7846	5.16556	4.25077
ASHGA5P052358	1.8853	up	noncoding	NR_040093	STARD4-AS1	RefSeq	5525	chr5	+	110847923	111075423		GCCAGTTTGACTAGATGTAAAGTACTTGGATTAAAGTGATAATCTTACTTTGTGGCCTAT	100505678	natural antisense	NM_001142475	NREP	neuronal regeneration-related protein isoform c	-	111064999	111312628	38.1338	21.7846	5.16556	4.25077
ASHGA5P052358	1.8853	up	noncoding	NR_040093	STARD4-AS1	RefSeq	5525	chr5	+	110847923	111075423		GCCAGTTTGACTAGATGTAAAGTACTTGGATTAAAGTGATAATCTTACTTTGTGGCCTAT	100505678	natural antisense	NM_001142476	NREP	neuronal regeneration-related protein isoform a	-	111064999	111093915	38.1338	21.7846	5.16556	4.25077
ASHGA5P052358	1.8853	up	noncoding	NR_040093	STARD4-AS1	RefSeq	5525	chr5	+	110847923	111075423		GCCAGTTTGACTAGATGTAAAGTACTTGGATTAAAGTGATAATCTTACTTTGTGGCCTAT	100505678	natural antisense	NM_001142477	NREP	neuronal regeneration-related protein isoform a	-	111064999	111093793	38.1338	21.7846	5.16556	4.25077
ASHGA5P052358	1.8853	up	noncoding	NR_040093	STARD4-AS1	RefSeq	5525	chr5	+	110847923	111075423		GCCAGTTTGACTAGATGTAAAGTACTTGGATTAAAGTGATAATCTTACTTTGTGGCCTAT	100505678	natural antisense	NM_001142478	NREP	neuronal regeneration-related protein isoform a	-	111064999	111093399	38.1338	21.7846	5.16556	4.25077
ASHGA5P052358	1.8853	up	noncoding	NR_040093	STARD4-AS1	RefSeq	5525	chr5	+	110847923	111075423		GCCAGTTTGACTAGATGTAAAGTACTTGGATTAAAGTGATAATCTTACTTTGTGGCCTAT	100505678	natural antisense	NM_001142479	NREP	neuronal regeneration-related protein isoform a	-	111064999	111093252	38.1338	21.7846	5.16556	4.25077
ASHGA5P052358	1.8853	up	noncoding	NR_040093	STARD4-AS1	RefSeq	5525	chr5	+	110847923	111075423		GCCAGTTTGACTAGATGTAAAGTACTTGGATTAAAGTGATAATCTTACTTTGTGGCCTAT	100505678	natural antisense	NM_001142480	NREP	neuronal regeneration-related protein isoform a	-	111064999	111093252	38.1338	21.7846	5.16556	4.25077
ASHGA5P052358	1.8853	up	noncoding	NR_040093	STARD4-AS1	RefSeq	5525	chr5	+	110847923	111075423		GCCAGTTTGACTAGATGTAAAGTACTTGGATTAAAGTGATAATCTTACTTTGTGGCCTAT	100505678	natural antisense	NM_001142481	NREP	neuronal regeneration-related protein isoform a	-	111064999	111093106	38.1338	21.7846	5.16556	4.25077
ASHGA5P052358	1.8853	up	noncoding	NR_040093	STARD4-AS1	RefSeq	5525	chr5	+	110847923	111075423		GCCAGTTTGACTAGATGTAAAGTACTTGGATTAAAGTGATAATCTTACTTTGTGGCCTAT	100505678	natural antisense	NM_001142482	NREP	neuronal regeneration-related protein isoform a	-	111064999	111093104	38.1338	21.7846	5.16556	4.25077
ASHGA5P052358	1.8853	up	noncoding	NR_040093	STARD4-AS1	RefSeq	5525	chr5	+	110847923	111075423		GCCAGTTTGACTAGATGTAAAGTACTTGGATTAAAGTGATAATCTTACTTTGTGGCCTAT	100505678	natural antisense	NM_001142483	NREP	neuronal regeneration-related protein isoform a	-	111064999	111091948	38.1338	21.7846	5.16556	4.25077
ASHGA5P052358	1.8853	up	noncoding	NR_040093	STARD4-AS1	RefSeq	5525	chr5	+	110847923	111075423		GCCAGTTTGACTAGATGTAAAGTACTTGGATTAAAGTGATAATCTTACTTTGTGGCCTAT	100505678	natural antisense	NM_004772	NREP	neuronal regeneration-related protein isoform a	-	111064999	111092945	38.1338	21.7846	5.16556	4.25077
ASHGA5P052358	1.8853	up	noncoding	NR_040093	STARD4-AS1	RefSeq	5525	chr5	+	110847923	111075423		GCCAGTTTGACTAGATGTAAAGTACTTGGATTAAAGTGATAATCTTACTTTGTGGCCTAT	100505678	natural antisense	NM_139164	STARD4	stAR-related lipid transfer protein 4	-	110834021	110848157	38.1338	21.7846	5.16556	4.25077
ASHGA5P034089	1.27764	up	noncoding	ENST00000427154	RP1-184J9.2	GENCODE	666	chr1	-	23346639	23414551		GAAAAGGTGTGCAAGAAAGACCTAAGGAATAAAATACCCCTCCCAGCAATCATCGATGCC		exon sense-overlapping	NM_001142546	LUZP1	leucine zipper protein 1	-	23410515	23495351	1900.59	1225.33	10.8906	10.5371
ASHGA5P034089	1.27764	up	noncoding	ENST00000427154	RP1-184J9.2	GENCODE	666	chr1	-	23346639	23414551		GAAAAGGTGTGCAAGAAAGACCTAAGGAATAAAATACCCCTCCCAGCAATCATCGATGCC		exon sense-overlapping	NM_033631	LUZP1	leucine zipper protein 1	-	23410515	23495351	1900.59	1225.33	10.8906	10.5371
ASHGA5P034089	1.27764	up	noncoding	ENST00000427154	RP1-184J9.2	GENCODE	666	chr1	-	23346639	23414551		GAAAAGGTGTGCAAGAAAGACCTAAGGAATAAAATACCCCTCCCAGCAATCATCGATGCC		intronic antisense	NM_001009999	KDM1A	lysine-specific histone demethylase 1A isoform a	+	23345940	23410184	1900.59	1225.33	10.8906	10.5371
ASHGA5P034089	1.27764	up	noncoding	ENST00000427154	RP1-184J9.2	GENCODE	666	chr1	-	23346639	23414551		GAAAAGGTGTGCAAGAAAGACCTAAGGAATAAAATACCCCTCCCAGCAATCATCGATGCC		intronic antisense	NM_015013	KDM1A	lysine-specific histone demethylase 1A isoform b	+	23345940	23410184	1900.59	1225.33	10.8906	10.5371
ASHGA5P048308	1.04275	up	noncoding	BG900305R		LincRNAs identified by Khalil et al	381	chr3	-	187467858	187468152		AAAAAATGCAGGCACAACACGCAAATCAAGTTTTTCCACTTCTAGCCTTAGGTAGTAGAG		intergenic							94.4923	84.8689	6.52077	6.46038
ASHGA5P026138	1.33609	up	noncoding	ENST00000530366	TSSC2	GENCODE	382	chr11	+	3402222	3405641		CTCATAGTGTGGCCATGCTGGGGGAAGCTTAGGTAGTCACAGTACTGGCCTTTTTGGGTG		intergenic							207.05	141.653	7.68982	7.27179
ASHGA5P035053	1.10125	up	noncoding	NR_033980	FLJ16341	RefSeq	1705	chr2	-	61074894	61108449		GGATTTCCCCCGGGAGCTCTTTTTGCGAAGGATGTTTTGTTTTTCCTTTGTGAATAGGGA	400957	bidirectional	NM_002908	REL	proto-oncogene c-Rel	+	61108751	61150178	100.704	85.8814	6.61391	6.47478
ASHGA5P015640	5.51423	up	noncoding	ENST00000422153	RP11-126K1.8	GENCODE	358	chr1	+	151313123	151314442		GCTACCCTATGTAGAGGACAAAGTAGGTCTTCAATAAATATTAGTTGGTTTTCTGTGATT		natural antisense	NM_000449	RFX5	DNA-binding protein RFX5	-	151313115	151319769	31.7101	5	4.88872	2.42556
ASHGA5P015640	5.51423	up	noncoding	ENST00000422153	RP11-126K1.8	GENCODE	358	chr1	+	151313123	151314442		GCTACCCTATGTAGAGGACAAAGTAGGTCTTCAATAAATATTAGTTGGTTTTCTGTGATT		natural antisense	NM_001025603	RFX5	DNA-binding protein RFX5	-	151313115	151319769	31.7101	5	4.88872	2.42556
ASHGA5P025737	1.63647	up	noncoding	NR_030765	ATP5SL	RefSeq	1719	chr19	-	41937222	41945843	NM_001167867, NM_001167868, NM_001167869, NM_018035	ATTACTTGCTCCAAAGGGAGATGTACAAGATCTTACACCTGGCTGGAGAAGCAACATGGT	55101	exon sense-overlapping	NM_001167867	ATP5SL	ATP synthase subunit s-like protein isoform 1	-	41937222	41945481	159.374	92.4633	7.29787	6.58729
ASHGA5P025737	1.63647	up	noncoding	NR_030765	ATP5SL	RefSeq	1719	chr19	-	41937222	41945843	NM_001167867, NM_001167868, NM_001167869, NM_018035	ATTACTTGCTCCAAAGGGAGATGTACAAGATCTTACACCTGGCTGGAGAAGCAACATGGT	55101	exon sense-overlapping	NM_001167868	ATP5SL	ATP synthase subunit s-like protein isoform 2	-	41937222	41945481	159.374	92.4633	7.29787	6.58729
ASHGA5P025737	1.63647	up	noncoding	NR_030765	ATP5SL	RefSeq	1719	chr19	-	41937222	41945843	NM_001167867, NM_001167868, NM_001167869, NM_018035	ATTACTTGCTCCAAAGGGAGATGTACAAGATCTTACACCTGGCTGGAGAAGCAACATGGT	55101	exon sense-overlapping	NM_001167869	ATP5SL	ATP synthase subunit s-like protein isoform 3	-	41937222	41945843	159.374	92.4633	7.29787	6.58729
ASHGA5P025737	1.63647	up	noncoding	NR_030765	ATP5SL	RefSeq	1719	chr19	-	41937222	41945843	NM_001167867, NM_001167868, NM_001167869, NM_018035	ATTACTTGCTCCAAAGGGAGATGTACAAGATCTTACACCTGGCTGGAGAAGCAACATGGT	55101	exon sense-overlapping	NM_001167870	ATP5SL	ATP synthase subunit s-like protein isoform 6	-	41937222	41945843	159.374	92.4633	7.29787	6.58729
ASHGA5P025737	1.63647	up	noncoding	NR_030765	ATP5SL	RefSeq	1719	chr19	-	41937222	41945843	NM_001167867, NM_001167868, NM_001167869, NM_018035	ATTACTTGCTCCAAAGGGAGATGTACAAGATCTTACACCTGGCTGGAGAAGCAACATGGT	55101	exon sense-overlapping	NM_001167871	ATP5SL	ATP synthase subunit s-like protein isoform 5	-	41937222	41945843	159.374	92.4633	7.29787	6.58729
ASHGA5P025737	1.63647	up	noncoding	NR_030765	ATP5SL	RefSeq	1719	chr19	-	41937222	41945843	NM_001167867, NM_001167868, NM_001167869, NM_018035	ATTACTTGCTCCAAAGGGAGATGTACAAGATCTTACACCTGGCTGGAGAAGCAACATGGT	55101	exon sense-overlapping	NM_018035	ATP5SL	ATP synthase subunit s-like protein isoform 4	-	41937222	41945843	159.374	92.4633	7.29787	6.58729
ASHGA5P020077	4.87047	up	noncoding	ENST00000507817	RP11-565A3.2	GENCODE	483	chr4	-	188454031	188593795		AAGTGTCAGAAGTATTGATTCTGCAACAAACTGAGAAGAAACCTGGCGATTCACAACAGA		intergenic							34.2339	7.86475	5.00772	2.72366
ASHGA5P022446	1.33845	up	noncoding	ENST00000556874	RP11-72M17.1	GENCODE	1206	chr14	-	66697050	66976112		TCTCGTCCAGTGTGACATTCTTCAGAATTCATCCTGGAATCAATATTATGCCAAAGAAAA		intronic antisense	NM_001024218	GPHN	gephyrin isoform 2	+	66974124	67648525	59.219	44.6818	5.8292	5.40864
ASHGA5P022446	1.33845	up	noncoding	ENST00000556874	RP11-72M17.1	GENCODE	1206	chr14	-	66697050	66976112		TCTCGTCCAGTGTGACATTCTTCAGAATTCATCCTGGAATCAATATTATGCCAAAGAAAA		intronic antisense	NM_020806	GPHN	gephyrin isoform 1	+	66974124	67648525	59.219	44.6818	5.8292	5.40864
ASHGA5P023298	1.05168	up	noncoding	ENST00000577765	RP11-973F15.2	GENCODE	501	chr8	-	123712507	123715662		TTACATGCATTGTCTCACTTGTTTCCAACAATGACAGCCCCCAAAGAACCTCACCAGCAC		intergenic							199.914	170.08	7.63502	7.56232
ASHGA5P027194	1.10676	up	noncoding	ENST00000550874	RP11-630C16.2	GENCODE	499	chr12	-	42223699	42326394		GGGCAGCGGCGTTTGAACGTTGAGCAAAGCCTTTCCATTCACCTGTAAAATAGAATCAAA		intergenic							50.4241	45.58	5.58772	5.44138
ASHGA5P036723	1.0768	up	noncoding	ENST00000454331	RP4-610C12.3	GENCODE	553	chr20	-	29521636	29522987	NR_026658	TATTTATAACTCCCTCTATAACTCTCTGTTTGGAGACACTGTGGCTCTATTGACAGACTG		intergenic							96.82	84.3435	6.55728	6.45053
ASHGA5P016369	1.36694	up	noncoding	ENST00000563377	RP11-252A24.2	pseudogene	2051	chr16	-	74366464	74394757	ENST00000288050, ENST00000429810, ENST00000566802, NR_026950	TCCCAAAATGGTGTTCAGATCTATGACCGGACATCTGTTCTTCAAGTAATGGGCAAAAAA									58.0666	43.0047	5.79973	5.34878
ASHGA5P026281	1.02413	up	noncoding	ENST00000525871	RP5-1024C24.1	GENCODE	439	chr11	+	30605709	30606507		TGGAGGCCACGGGATCTCCCCCTCTTCTGACATCTTTTTTCACTTAAACTTTTGTTTGTC		intronic antisense	NM_001145399	MPPED2	metallophosphoesterase MPPED2 isoform 2	-	30406039	30607930	9404.2	7765.02	13.1927	13.1583
ASHGA5P035122	1.02361	up	noncoding	ENST00000437233	AC084149.2	GENCODE	284	chr2	-	77879538	77881794		CATTTCTGATGGCTTTTATCCATCCTGCCCAAATAAAATAAACAAATTACCCTGCTACTT		intergenic							121.639	110.499	6.90258	6.86891
ASHGA5P056305	1.15707	up	noncoding	TCONS_00002077	XLOC_000266	LincRNAs identified by Cabili et al	244	chr1	+	79775370	79871942	TCONS_00002078, TCONS_00002079	TCTCCTAGGACATCCTGGGAGAAACTGTGACTGCTGGTGATTTTTGCTGTTAAAATAGCC		intergenic							70.7051	59.3442	6.08694	5.87646
ASHGA5P040675	1.54056	up	noncoding	ENST00000454380	AC116366.5	GENCODE	767	chr5	-	131755107	131762406		GATATCAAGAAGTCAAGCATTTCTTAACAACAGCAGCAAACTCTTACACAGGGCTGTGGT		intronic antisense	ENST00000337752	C5orf56	chromosome 5 open reading frame 56 [Source:HGNC Symbol;Acc:33838]	+	131746672	131798059	26.9624	19.2525	4.6616	4.03814
ASHGA5P040675	1.54056	up	noncoding	ENST00000454380	AC116366.5	GENCODE	767	chr5	-	131755107	131762406		GATATCAAGAAGTCAAGCATTTCTTAACAACAGCAGCAAACTCTTACACAGGGCTGTGGT		intronic antisense	ENST00000378947	C5orf56	chromosome 5 open reading frame 56 [Source:HGNC Symbol;Acc:33838]	+	131746680	131793113	26.9624	19.2525	4.6616	4.03814
ASHGA5P040675	1.54056	up	noncoding	ENST00000454380	AC116366.5	GENCODE	767	chr5	-	131755107	131762406		GATATCAAGAAGTCAAGCATTTCTTAACAACAGCAGCAAACTCTTACACAGGGCTGTGGT		intronic antisense	ENST00000378953	C5orf56	chromosome 5 open reading frame 56 [Source:HGNC Symbol;Acc:33838]	+	131746327	131811736	26.9624	19.2525	4.6616	4.03814
ASHGA5P040675	1.54056	up	noncoding	ENST00000454380	AC116366.5	GENCODE	767	chr5	-	131755107	131762406		GATATCAAGAAGTCAAGCATTTCTTAACAACAGCAGCAAACTCTTACACAGGGCTGTGGT		intronic antisense	ENST00000407797	C5orf56	chromosome 5 open reading frame 56 [Source:HGNC Symbol;Acc:33838]	+	131746680	131806600	26.9624	19.2525	4.6616	4.03814
ASHGA5P014912	1.9444	up	noncoding	ENST00000414699	AL773572.7	GENCODE	336	chr21	-	42552458	42558247		GTAATATCAGGCACAAAGGAAGGGCACTACAACCACAACCAATATCAGTAAAGCTTTGGA		exon sense-overlapping	NM_182832	PLAC4	placenta-specific protein 4	-	42547157	42557166	141.904	70.9561	7.13204	6.17271
ASHGA5P014912	1.9444	up	noncoding	ENST00000414699	AL773572.7	GENCODE	336	chr21	-	42552458	42558247		GTAATATCAGGCACAAAGGAAGGGCACTACAACCACAACCAATATCAGTAAAGCTTTGGA		intronic antisense	NM_012105	BACE2	beta-secretase 2 isoform A preproprotein	+	42539727	42648524	141.904	70.9561	7.13204	6.17271
ASHGA5P014912	1.9444	up	noncoding	ENST00000414699	AL773572.7	GENCODE	336	chr21	-	42552458	42558247		GTAATATCAGGCACAAAGGAAGGGCACTACAACCACAACCAATATCAGTAAAGCTTTGGA		intronic antisense	NM_138991	BACE2	beta-secretase 2 isoform C preproprotein	+	42539727	42648524	141.904	70.9561	7.13204	6.17271
ASHGA5P014912	1.9444	up	noncoding	ENST00000414699	AL773572.7	GENCODE	336	chr21	-	42552458	42558247		GTAATATCAGGCACAAAGGAAGGGCACTACAACCACAACCAATATCAGTAAAGCTTTGGA		intronic antisense	NM_138992	BACE2	beta-secretase 2 isoform B preproprotein	+	42539727	42648524	141.904	70.9561	7.13204	6.17271
ASHGA5P041491	1.22838	up	noncoding	TCONS_00020481	XLOC_009812	LincRNAs identified by Cabili et al	222	chr12	+	77511552	77514022		CTATATCCCATTCCAGCAGCCAATATCTTAACAAAAGGGAAGCTATTATGGAAGAAAATT		intergenic							200.114	147.737	7.63596	7.33921
ASHGA5P037549	2.95372	up	noncoding	ENST00000443935	AC004019.13	GENCODE	1838	chr22	-	18062922	18071958		CTTGGGACGATAAAGAGAACTGTAAACTTAATTTTGTAGTTAGAGAAGATGAACCCAAAC		natural antisense	NM_031481	SLC25A18	mitochondrial glutamate carrier 2	+	18043182	18073647	251.943	82.1834	7.9716	6.40907
ASHGA5P018937	1.18189	up	noncoding	NR_049755	RPP14	RefSeq	3402	chr3	+	58291971	58305920		CCGGCGCGAGAGAATTTCAAGATTGTGGAGTTGGACTGAATGCTGCACAGTTCAAACAGC	11102	exon sense-overlapping	NM_001098783	RPP14	ribonuclease P protein subunit p14	+	58291971	58305920	250.354	188.232	7.96225	7.72115
ASHGA5P018937	1.18189	up	noncoding	NR_049755	RPP14	RefSeq	3402	chr3	+	58291971	58305920		CCGGCGCGAGAGAATTTCAAGATTGTGGAGTTGGACTGAATGCTGCACAGTTCAAACAGC	11102	exon sense-overlapping	NM_007042	RPP14	ribonuclease P protein subunit p14	+	58291971	58305920	250.354	188.232	7.96225	7.72115
ASHGA5P045221	1.19448	up	noncoding	uc004aaz.2	AK131521	UCSC_knowngene	2029	chr9	-	38406525	38408554		TGGGTTTTTCTACCGTTTTTGTAGATGTCATGATGTCACGACCCCTGCACCCTGAAAAAA		intergenic							790.978	558.893	9.62107	9.36468
ASHGA5P020832	2.52488	up	noncoding	NR_036633	VAPB	RefSeq	7764	chr20	+	56964174	57026156		GGAATCATCGATGCAGGGGCCTCAATTAATGTATCTGCATGATGTAGAAATAAATAAAAT	9217	exon sense-overlapping	NM_001195677	VAPB	vesicle-associated membrane protein-associated protein B/C isoform 2	+	56964174	57026156	19.3694	8.58409	4.17329	2.83708
ASHGA5P020832	2.52488	up	noncoding	NR_036633	VAPB	RefSeq	7764	chr20	+	56964174	57026156		GGAATCATCGATGCAGGGGCCTCAATTAATGTATCTGCATGATGTAGAAATAAATAAAAT	9217	exon sense-overlapping	NM_004738	VAPB	vesicle-associated membrane protein-associated protein B/C isoform 1	+	56964174	57026156	19.3694	8.58409	4.17329	2.83708
ASHGA5P021697	1.44977	up	noncoding	ENST00000538550	RP11-21A7A.2	GENCODE	553	chr11	+	63827895	63870985		TGACCTGGGGCAAGGTGAGGAAGCAGGCAGTGGGCGAGAAGATGGATTCCTTTTTGGACA		intronic antisense	NM_014067	MACROD1	O-acetyl-ADP-ribose deacetylase MACROD1	-	63766029	63933585	227.069	142.879	7.82235	7.28653
ASHGA5P039987	1.36045	up	noncoding	ENST00000507739	RP11-567N4.3	GENCODE	681	chr4	+	76326404	76348232	ENST00000515230	GGAAGTTTTCCATTTTATGAGAAACTCAAACCACCAAGAAAACCAGCTTATCTCACAAAA		intergenic							39.715	30.3032	5.22722	4.78314
ASHGA5P039228	1.10752	up	noncoding	TCONS_00017601	XLOC_008272	LincRNAs identified by Cabili et al	445	chrY	+	1801476	1810881	ENST00000427886	AATGTGAACAGTGGACACTGTGTTGGGGTCTCCTACCTGTGCCTGTGATGTGGACTGGCC		intergenic							1813.93	1350.87	10.8221	10.6747
ASHGA5P019427	3.42058	up	noncoding	ENST00000483636	RP11-64D22.2	GENCODE	1285	chr3	+	151488247	151502682		CTGGTGTGGATAGCTACACCTGTGAAAATGGTAACAAATTTGCTTTGTTTAATTATGACT		intergenic							58.1524	19.1312	5.8025	4.02827
ASHGA5P021368	1.01187	up	noncoding	ENST00000531024	RP11-385N17.1	GENCODE	766	chr12	+	114846009	114847804		AAACCAACCCGGCTTTCTCCGGAGGAATGAGGCGCAGTGGTGGATGCTCGCAAACTTTTG		natural antisense	NM_000192	TBX5	T-box transcription factor TBX5 isoform 1	-	114791734	114846247	719.457	595.973	9.47836	9.46133
ASHGA5P021368	1.01187	up	noncoding	ENST00000531024	RP11-385N17.1	GENCODE	766	chr12	+	114846009	114847804		AAACCAACCCGGCTTTCTCCGGAGGAATGAGGCGCAGTGGTGGATGCTCGCAAACTTTTG		natural antisense	NM_080717	TBX5	T-box transcription factor TBX5 isoform 3	-	114791734	114846247	719.457	595.973	9.47836	9.46133
ASHGA5P052785	1.23691	up	noncoding	ENST00000452402	RP11-250B2.3	GENCODE	682	chr6	+	81153060	81175644		CCATGGGGCAAGAAACATGAGGATGAAAAGCCAATATGTTAAGGACATGAAGTGAAAAGC		intergenic							11.8963	10.9315	3.45515	3.14841
ASHGA5P044940	1.22986	up	noncoding	TCONS_00015497	XLOC_007210	LincRNAs identified by Cabili et al	327	chr8	-	127630407	127634583		TTTTAGAGCTGGGATGGATTTTCCAGAAATCTTCTGTTTCAAACACCTGCCCTAGGATAG		intergenic							1193.31	807.621	10.2115	9.91304
ASHGA5P052200	1.07737	up	noncoding	NR_027253	LOC285696	RefSeq	3316	chr5	-	17130136	17217531		CTCCTCCGGCGCAGACCCTCCCCTCTCCCCTCCAGCCTGGACACGCCCGCCTCCCCTTGA	285696	bidirectional	NM_006317	BASP1	brain acid soluble protein 1	+	17217749	17276943	269022	243111	18.0448	17.9373
ASHGA5P049045	1.13553	up	noncoding	NR_040252	ANKS3	RefSeq	2667	chr16	-	4746510	4784378		TAACGCACGTTCTGTGTTCTCTTGAAGCAAGGTGCAGAGCTAGAAATGAAAGACATCCAG	124401	exon sense-overlapping	NM_001242929	ANKS3	ankyrin repeat and SAM domain-containing protein 3 isoform 2	-	4746510	4784378	27.716	25.6443	4.70119	4.51782
ASHGA5P049045	1.13553	up	noncoding	NR_040252	ANKS3	RefSeq	2667	chr16	-	4746510	4784378		TAACGCACGTTCTGTGTTCTCTTGAAGCAAGGTGCAGAGCTAGAAATGAAAGACATCCAG	124401	exon sense-overlapping	NM_133450	ANKS3	ankyrin repeat and SAM domain-containing protein 3 isoform 1	-	4746510	4784163	27.716	25.6443	4.70119	4.51782
ASHGA5P049045	1.13553	up	noncoding	NR_040252	ANKS3	RefSeq	2667	chr16	-	4746510	4784378		TAACGCACGTTCTGTGTTCTCTTGAAGCAAGGTGCAGAGCTAGAAATGAAAGACATCCAG	124401	natural antisense	NM_139170	C16orf71	uncharacterized protein C16orf71	+	4784288	4799397	27.716	25.6443	4.70119	4.51782
ASHGA5P045342	2.63725	up	noncoding	ENST00000427259	LINC00476	GENCODE	893	chr9	-	98632121	98637552		CTGGTGTTTCAACATCCATTAGAACTGAATAATCATACTGCATATCAAAGTTTGTGGGAA	100128782	bidirectional	NM_001010895	ERCC6L2	RAD26L hypothetical protein	+	98637899	98731122	217.023	79.6072	7.75659	6.35755
ASHGA5P044006	1.52931	up	noncoding	uc003wgl.2	BC045757	UCSC_knowngene	1870	chr7	+	149535478	149537348		TTTCCAAGCTATTCTGTTCAGTCAGAGGCTTTCTTAGCCTTTAACGGGAGAAGAGAAATA		exon sense-overlapping	NM_001099220	ZNF862	zinc finger protein 862	+	149535508	149564568	1303.46	708.866	10.3353	9.72243
ASHGA5P035206	1.27264	up	noncoding	ENST00000456519	AC010884.1	GENCODE	472	chr2	-	105552868	105654954		TCTCAATGTGTGCTCATGTTTCCTTAGGAGTTTGCACCCACTTCTCAGAGCTAACGAGAT		intronic antisense	NM_182640	MRPS9	28S ribosomal protein S9, mitochondrial	+	105654482	105716418	645.436	428.768	9.31814	8.97032
ASHGA5P030485	1.43414	up	noncoding	TCONS_00008492	XLOC_003959	LincRNAs identified by Cabili et al	471	chr4	-	58291142	58291939		CCTCCCATGACAACTTCCAAAGGAAAAATAGACTATAATTATCAGAAACCCAATTGCCCT		intergenic							128.516	84.8636	6.98046	6.46027
ASHGA5P047478	1.3068	up	noncoding	ENST00000415746	RP11-432J9.3	GENCODE	1963	chr10	+	72689681	72691814		AGGAAACTTCTGTAAGAGGATGCTTCCAGCCTGAAATGATTCATCCCCTCTGTGAGATTC		intergenic							279.937	190.973	8.12909	7.74306
ASHGA5P026256	1.11922	up	noncoding	ENST00000534068	RP11-945A11.1	GENCODE	683	chr11	+	23752133	23818516		TGAAAGGACACAGAAAAATATTTAGGACAATTAAAGCAAGCTACCATTCTAGACATAGGG		intergenic							5.71197	6.14	2.66129	2.4988
ASHGA5P020657	1.09699	up	noncoding	ENST00000518046	HOXA-AS2	GENCODE	422	chr7	+	27155023	27161792		CCAGCTCTCCGAAAAGGAAACGCCAAGACATAGAAAACCACGCTTTTCCCGTAGGAAGAA	285943	intronic antisense	NM_030661	HOXA3	homeobox protein Hox-A3 isoform a	-	27145808	27159214	11304.7	8694.51	13.4509	13.3174
ASHGA5P020657	1.09699	up	noncoding	ENST00000518046	HOXA-AS2	GENCODE	422	chr7	+	27155023	27161792		CCAGCTCTCCGAAAAGGAAACGCCAAGACATAGAAAACCACGCTTTTCCCGTAGGAAGAA	285943	intronic antisense	NM_153631	HOXA3	homeobox protein Hox-A3 isoform a	-	27145808	27166639	11304.7	8694.51	13.4509	13.3174
ASHGA5P040811	1.2251	up	noncoding	ENST00000518134	RP11-54C4.1	GENCODE	520	chr5	-	151145419	151145939		ACATTGGGGTGAGGCCATCACTTCATCCAGTGACTAGCACCACCTCTGGCAATGTCAGCC		intron sense-overlapping	ENST00000524142	ATOX1	ATX1 antioxidant protein 1 homolog (yeast) [Source:HGNC Symbol;Acc:798]	-	151122382	151152093	20570.8	14777	14.331	14.0381
ASHGA5P041021	1.92551	up	noncoding	ENST00000423102	PMCHL1	pseudogene	261	chr5	+	22142481	22143012	ENST00000415808, ENST00000430902, ENST00000457791, NM_002674, uc003jgl.3, uc003jgm.3, uc003jgn.3, uc010iue.3, uc011cnp.1, uc011cnq.2, uc011cnr.2, uc011cns.2, uc011cnt.1, uc011cry.2, uc011crz.2, uc011csa.2, uc011csb.2, uc011csc.2	GAGAAACTGGGGATGAAGAAAACTCAGCTAAATTTCCTGTAGGAAGGAGAGATTTTGACA	5369								1597.68	692.631	10.6274	9.68219
ASHGA5P057194	1.20225	up	noncoding	TCONS_00014274	XLOC_006383	LincRNAs identified by Cabili et al	629	chr7	-	25870913	25872690		AAATTTCAGCTGAGAAGACAGGATGTTTCCATTCTAATTGCAGATGAAGTGCCCTGGGGG		intergenic							24.2268	21.5725	4.50202	4.23629
ASHGA5P037404	1.00795	up	noncoding	NR_038400	LINC00308	RefSeq	727	chr21	+	23470935	23488847	ENST00000419431	TACAAGGAAAAAAGTGTCTCCCAGCCTGTGGAAAGAGGATGGCTATTTCATCCACTAAAG	54143	intergenic							69621.4	62195	16.0343	16.0229
ASHGA5P018777	1.05236	up	noncoding	ENST00000457510	AC002467.7	GENCODE	657	chr7	+	107383261	107384573		TCAGGTGTTCGAGAGGTTCGTAGCGTCACAAGCGCTCTCCCTGCTTGGACTTCCGCCTCC		exon sense-overlapping	NM_024814	CBLL1	E3 ubiquitin-protein ligase Hakai	+	107384278	107402083	40597.9	33892.1	15.2561	15.1825
ASHGA5P053406	2.01073	up	noncoding	ENST00000442067	GAS5	GENCODE	1114	chr1	-	173833768	173836181	ENST00000416952, ENST00000436656	TGAAACAGTAGTTGGGAAATCTTTTAGAAATCCACCTATTACTACCTATTGGTAAAGGAG	60674	intergenic							202.444	95.7938	7.6543	6.64658
ASHGA5P036275	1.08458	up	noncoding	ENST00000442036	AC009948.5	GENCODE	740	chr2	+	179278713	179283850		GCCCAGTGTTTCAAAGCAAAAGTCCCATCATGTGAGTTGATCTTTATTAACACTAATTTT		intergenic							228.564	187.656	7.83252	7.71537
ASHGA5P022576	1.51375	up	noncoding	ENST00000559029	RP11-279F6.1	GENCODE	309	chr15	+	69845054	69856009		AGAGGCCAGCACGCACAGTGACTTAATCCAAGAAGATGGAATAAAAAGGCCTACCTCATT		intergenic							84.773	55.2328	6.35217	5.75404
ASHGA5P026556	1.09136	up	noncoding	TCONS_00011961	XLOC_005475	LincRNAs identified by Cabili et al	398	chr6	+	137736805	137739549		AATGCCAGAAACTGACCCAGAGGCATTAGTTCATCCCCACGTTGGAGGGAAGTAAAAAAT		intergenic							50.8096	46.5	5.59985	5.47373
ASHGA5P054715	1.18084	up	noncoding	TCONS_00006770	XLOC_003405	LincRNAs identified by Cabili et al	487	chr3	-	197363225	197364301	TCONS_00006377	TCAGTTACTGAGAAGAGAAAGAAAATGTCTTCTGAAAGAGGTGAACTCAGTCATTACCAA		intergenic							106.455	84.8353	6.6994	6.45959
ASHGA5P022065	1.136	up	noncoding	ENST00000548361	RP11-44N21.1	GENCODE	346	chr14	+	105561661	105562104		GGGGGCCCAGCTGTTGTCCACACCAAGGGTGGCCTACAGAGGGAAGTGAGGACCTTGGGA		intergenic							70.0703	59.8667	6.0745	5.89054
ASHGA5P026531	1.45785	up	noncoding	TCONS_00011946	XLOC_005458	LincRNAs identified by Cabili et al	2134	chr6	+	126380776	126400068		GAAGAACTCATGGTAACGAGTCATGTTTTTCTCTCATAGGATAATAGTAACAGCGAATAT		intron sense-overlapping	ENST00000563385	RP11-73O6.4	Uncharacterized protein [Source:UniProtKB/TrEMBL;Acc:H3BR05]	+	126112110	130461627	35.484	25.6122	5.06004	4.5162
ASHGA5P038804	1.31982	up	noncoding	NR_026988	LOC339524	RefSeq	3125	chr1	+	87595447	87602352	NR_026989	AAGGGAGAAGAGTGGGAGGAGGAAATAAGCAACAGGCAGCTTCCTTTCTTGACAGATGGA	339524	exon sense-overlapping	ENST00000356813	HS2ST1	heparan sulfate 2-O-sulfotransferase 1 [Source:HGNC Symbol;Acc:5193]	+	87458764	87602334	109.474	78.9683	6.74512	6.34477
ASHGA5P038804	1.31982	up	noncoding	NR_026988	LOC339524	RefSeq	3125	chr1	+	87595447	87602352	NR_026989	AAGGGAGAAGAGTGGGAGGAGGAAATAAGCAACAGGCAGCTTCCTTTCTTGACAGATGGA	339524	exon sense-overlapping	ENST00000370548	HS2ST1	heparan sulfate 2-O-sulfotransferase 1 [Source:HGNC Symbol;Acc:5193]	+	87458691	87634887	109.474	78.9683	6.74512	6.34477
ASHGA5P058288	2.2793	up	noncoding	TCONS_00029279	XLOC_014063	LincRNAs identified by Cabili et al	220	chr21	-	35339557	35340977		AAAGAGCCCTTTTGAGAGACACAGAAATGGAAAGCACGTATTAAGGATGTGGAGCTACCC		intergenic							514.141	198.187	8.98827	7.79968
ASHGA5P013717	1.08282	up	noncoding	NR_047554	UBE2V1	RefSeq	2009	chr20	-	48697660	48729735		GCAGCCACCACGGGCTCGGACAATTTATGAAAACCGAATATACAGCCTTAAAATAGAATG	7335	exon sense-overlapping	NM_001032288	UBE2V1	ubiquitin-conjugating enzyme E2 variant 1 isoform d	-	48697660	48729735	961.789	739.74	9.90017	9.78538
ASHGA5P013717	1.08282	up	noncoding	NR_047554	UBE2V1	RefSeq	2009	chr20	-	48697660	48729735		GCAGCCACCACGGGCTCGGACAATTTATGAAAACCGAATATACAGCCTTAAAATAGAATG	7335	exon sense-overlapping	NM_001257393	UBE2V1	ubiquitin-conjugating enzyme E2 variant 1 isoform a	-	48697660	48732496	961.789	739.74	9.90017	9.78538
ASHGA5P013717	1.08282	up	noncoding	NR_047554	UBE2V1	RefSeq	2009	chr20	-	48697660	48729735		GCAGCCACCACGGGCTCGGACAATTTATGAAAACCGAATATACAGCCTTAAAATAGAATG	7335	exon sense-overlapping	NM_001257394	UBE2V1	ubiquitin-conjugating enzyme E2 variant 1 isoform c	-	48697660	48732496	961.789	739.74	9.90017	9.78538
ASHGA5P013717	1.08282	up	noncoding	NR_047554	UBE2V1	RefSeq	2009	chr20	-	48697660	48729735		GCAGCCACCACGGGCTCGGACAATTTATGAAAACCGAATATACAGCCTTAAAATAGAATG	7335	exon sense-overlapping	NM_001257395	UBE2V1	ubiquitin-conjugating enzyme E2 variant 1 isoform e	-	48697660	48729735	961.789	739.74	9.90017	9.78538
ASHGA5P013717	1.08282	up	noncoding	NR_047554	UBE2V1	RefSeq	2009	chr20	-	48697660	48729735		GCAGCCACCACGGGCTCGGACAATTTATGAAAACCGAATATACAGCCTTAAAATAGAATG	7335	exon sense-overlapping	NM_001257396	UBE2V1	ubiquitin-conjugating enzyme E2 variant 1 isoform f	-	48697660	48729735	961.789	739.74	9.90017	9.78538
ASHGA5P013717	1.08282	up	noncoding	NR_047554	UBE2V1	RefSeq	2009	chr20	-	48697660	48729735		GCAGCCACCACGGGCTCGGACAATTTATGAAAACCGAATATACAGCCTTAAAATAGAATG	7335	exon sense-overlapping	NM_001257397	UBE2V1	ubiquitin-conjugating enzyme E2 variant 1 isoform g	-	48697660	48729735	961.789	739.74	9.90017	9.78538
ASHGA5P013717	1.08282	up	noncoding	NR_047554	UBE2V1	RefSeq	2009	chr20	-	48697660	48729735		GCAGCCACCACGGGCTCGGACAATTTATGAAAACCGAATATACAGCCTTAAAATAGAATG	7335	exon sense-overlapping	NM_001257398	UBE2V1	ubiquitin-conjugating enzyme E2 variant 1 isoform g	-	48697660	48729735	961.789	739.74	9.90017	9.78538
ASHGA5P013717	1.08282	up	noncoding	NR_047554	UBE2V1	RefSeq	2009	chr20	-	48697660	48729735		GCAGCCACCACGGGCTCGGACAATTTATGAAAACCGAATATACAGCCTTAAAATAGAATG	7335	exon sense-overlapping	NM_001257399	UBE2V1	ubiquitin-conjugating enzyme E2 variant 1 isoform g	-	48697660	48729735	961.789	739.74	9.90017	9.78538
ASHGA5P013717	1.08282	up	noncoding	NR_047554	UBE2V1	RefSeq	2009	chr20	-	48697660	48729735		GCAGCCACCACGGGCTCGGACAATTTATGAAAACCGAATATACAGCCTTAAAATAGAATG	7335	exon sense-overlapping	NM_021988	UBE2V1	ubiquitin-conjugating enzyme E2 variant 1 isoform a	-	48697660	48732496	961.789	739.74	9.90017	9.78538
ASHGA5P013717	1.08282	up	noncoding	NR_047554	UBE2V1	RefSeq	2009	chr20	-	48697660	48729735		GCAGCCACCACGGGCTCGGACAATTTATGAAAACCGAATATACAGCCTTAAAATAGAATG	7335	exon sense-overlapping	NM_022442	UBE2V1	ubiquitin-conjugating enzyme E2 variant 1 isoform c	-	48697660	48732496	961.789	739.74	9.90017	9.78538
ASHGA5P013717	1.08282	up	noncoding	NR_047554	UBE2V1	RefSeq	2009	chr20	-	48697660	48729735		GCAGCCACCACGGGCTCGGACAATTTATGAAAACCGAATATACAGCCTTAAAATAGAATG	7335	exon sense-overlapping	NM_199144	UBE2V1	ubiquitin-conjugating enzyme E2 variant 1 isoform a	-	48697660	48732496	961.789	739.74	9.90017	9.78538
ASHGA5P013717	1.08282	up	noncoding	NR_047554	UBE2V1	RefSeq	2009	chr20	-	48697660	48729735		GCAGCCACCACGGGCTCGGACAATTTATGAAAACCGAATATACAGCCTTAAAATAGAATG	7335	exon sense-overlapping	NM_199203	TMEM189-UBE2V1	TMEM189-UBE2V1 fusion protein	-	48697660	48770335	961.789	739.74	9.90017	9.78538
ASHGA5P040604	1.04754	up	noncoding	ENST00000522464	CTD-2374C24.1	GENCODE	789	chr5	-	104308987	104582065		CTTTCTGCTGAAAGAGATCAGTGTGCTTTCTGTTTCCTGAACTCAACCTTGGGAAAAATA		intergenic							97.5416	87.3754	6.56772	6.50071
ASHGA5P058486	3.77978	up	noncoding	uc004ahc.1	AK096834	UCSC_knowngene	2554	chr9	-	71780234	71785971		GTCAATTAAGACCACTGAGTTTTGCAAGAATAAGGTGCTCATTATAAAGCATCTGAGGAG		intronic antisense	NM_001170414	TJP2	tight junction protein ZO-2 isoform 5	+	71736179	71870124	58.5024	17.5908	5.81107	3.89276
ASHGA5P030828	1.16758	up	noncoding	TCONS_00008433	XLOC_003880	LincRNAs identified by Cabili et al	261	chr4	-	9682415	9693365	ENST00000519726, NR_040091, NR_040092, TCONS_00006099	CTGCCACCCAGGCCAGAGTGCAGTTGACGCAGGGCAGGGGAGCCCCGAAATGGAGCATAG		intergenic							43.8685	37.8926	5.37547	5.15194
ASHGA5P035934	1.30778	up	noncoding	ENST00000428767	ALMS1P	pseudogene	921	chr2	+	73898156	73912212	ENST00000450720, NM_015120	TAAAGCGTCTGAAGTTAATAGTCCAGGAGAGAAAGCTGCAGAGCATGTTAAAGAGCGAGC	200420								51.8549	40.1583	5.63127	5.24415
ASHGA5P036387	1.75111	up	noncoding	ENST00000454444	AC007879.4	GENCODE	551	chr2	+	208091672	208093032		CTGCAACAAACTGTGGAATAATCTGACATAGGAAGAGGTGGATGGTACAGAAGAACAATA		intergenic							157.533	85.7137	7.28092	6.47265
ASHGA5P015597	1.16972	up	noncoding	NR_037575	MRPL10	RefSeq	1903	chr17	-	45900637	45908907		AGTTCCTTGTGACTCGACTGGCCGGCTGCCTACCCTCCAGACTGTCCGCTATGGCTCCAA	124995	exon sense-overlapping	NM_145255	MRPL10	39S ribosomal protein L10, mitochondrial isoform a precursor	-	45900637	45908907	2134.47	1498.12	11.0478	10.8217
ASHGA5P015597	1.16972	up	noncoding	NR_037575	MRPL10	RefSeq	1903	chr17	-	45900637	45908907		AGTTCCTTGTGACTCGACTGGCCGGCTGCCTACCCTCCAGACTGTCCGCTATGGCTCCAA	124995	exon sense-overlapping	NM_148887	MRPL10	39S ribosomal protein L10, mitochondrial isoform b	-	45900637	45908907	2134.47	1498.12	11.0478	10.8217
ASHGA5P041849	1.0097	up	noncoding	NR_045674	CLIC5	RefSeq	2018	chr6	-	45879359	45905334		CGCTGAAAGTACTAAGAATTATATCTGAAATCAAGCACTGGTAGCAGAACACAAATATGT	53405	exon sense-overlapping	NM_001114086	CLIC5	chloride intracellular channel protein 5 isoform a	-	45866189	46048085	5.49962	5	2.43948	2.42556
ASHGA5P041849	1.0097	up	noncoding	NR_045674	CLIC5	RefSeq	2018	chr6	-	45879359	45905334		CGCTGAAAGTACTAAGAATTATATCTGAAATCAAGCACTGGTAGCAGAACACAAATATGT	53405	exon sense-overlapping	NM_001256023	CLIC5	chloride intracellular channel protein 5 isoform c	-	45879359	45983626	5.49962	5	2.43948	2.42556
ASHGA5P041849	1.0097	up	noncoding	NR_045674	CLIC5	RefSeq	2018	chr6	-	45879359	45905334		CGCTGAAAGTACTAAGAATTATATCTGAAATCAAGCACTGGTAGCAGAACACAAATATGT	53405	exon sense-overlapping	NM_016929	CLIC5	chloride intracellular channel protein 5 isoform b	-	45866189	45983626	5.49962	5	2.43948	2.42556
ASHGA5P056508	1.63262	up	noncoding	TCONS_00005117	XLOC_002026	LincRNAs identified by Cabili et al	265	chr2	-	25956628	25959457		AAGAATGAAGGCTGTTTCATTGGTCGTATAAAAACAACCTTCTTCGAAGTTGAATGTATG		intergenic							70.0003	43.444	6.07365	5.36646
ASHGA5P018463	1.31321	up	noncoding	ENST00000453866	RP11-536P6.3	GENCODE	568	chr22	+	48844701	48847029		ACAGGGCTTGTTTCCTATGAAAGAGAGAATCCACTTAAGAATAAACTTCAGGGCTGGGCA		intergenic							66.9935	50.9403	6.00858	5.61549
ASHGA5P057822	1.95463	up	noncoding	TCONS_00022237	XLOC_010542	LincRNAs identified by Cabili et al	289	chr13	-	27781431	27782326		CTTCATGCTGCAACCTGCAGCAGGAAAATGGGCTTCAGTTTTCAAGTCTGCAGCTGAGTT		intergenic							213.171	103.448	7.73128	6.76438
ASHGA5P000123	1.11768	up	noncoding	BI089392		LincRNAs identified by Khalil et al	895	chr12	+	85736249	86096782		TGCCTGAGCCGTGACTCTGAGAGCTGGAGTACCACTGGACAAGGTCTTTGGTACTTCCTC		intergenic							53.2513	47.4619	5.66755	5.50704
ASHGA5P031567	1.01033	up	noncoding	TCONS_00007270	XLOC_003261	LincRNAs identified by Cabili et al	973	chr3	-	134044567	134046226		TTTTCTGTGTTTTGCCCCTCAGGGAACATGGCCACATCCCAAACTGGCTCCCCAGCAGCT		intergenic							1680.94	1365.2	10.7056	10.6908
ASHGA5P013986	2.47009	up	noncoding	NR_046467	MEG3	RefSeq	1793	chr14	+	101292444	101327360	NR_003530, NR_033358, uc021sbx.1	GCTCACAAAGGGCTAATCTCGGGCCTTGTCGAAGGAAGAGGCTGCAGACGTTAATGAGGT	55384	intergenic							155.13	62.1469	7.25838	5.95382
ASHGA5P057206	1.1621	up	noncoding	TCONS_00014603	XLOC_006704	LincRNAs identified by Cabili et al	610	chr8	+	9014344	9016127		AAATCCAAATGTCTGGGATGTTTCTCTTGCATGCCTCTGGAATCAAATGACTCTGATACT		intergenic							339.36	254.696	8.39711	8.18038
ASHGA5P021535	1.43047	up	noncoding	ENST00000534195	RP11-166D19.1	GENCODE	586	chr11	-	121961961	121975877		TTACAGAGAAAGCAGCATTGTGTTGATGTTCCTTTCAGCTGGTCCTATAGTACCCCTCCT		intergenic							190.307	122.885	7.56206	7.04557
ASHGA5P038278	1.78159	up	noncoding	TCONS_00024003	XLOC_011346	LincRNAs identified by Cabili et al	356	chr15	+	89943394	89953932	TCONS_00023502	TCCACCTAGATAAACCCCAAAAAGACAGCTCCAGTGAGGGACTAGCAAACCTGAGACCAG		intergenic							32.3595	19.8043	4.91858	4.08542
ASHGA5P049532	1.05342	up	noncoding	ENST00000584151	AC022596.2	GENCODE	719	chr17	-	16754815	16756091	ENST00000581247	TTTCTCAAATAGACTTCATTTGTCCCTTGAGGCTCAGCTCACTGCAGTTAACTAACTAAT		intergenic							104.017	92.4075	6.66161	6.58653
ASHGA5P043547	1.2455	up	noncoding	ENST00000447262	AC006481.1	GENCODE	432	chr7	+	20875049	21061771		GGCTGAAGACTGCTTAAATGTTGTCCCTGAGTCAATATCTTAACATTTATTGCATCTTTT		intergenic							95.4556	73.1673	6.53721	6.22048
ASHGA5P016354	1.05954	up	noncoding	ENST00000429663	AFG3L1P	GENCODE	458	chr16	+	90038993	90048294		GGCCCGACAGGGTTTGAGAAATACTTTAAGAGGAGTGGAAGGAACACAAACTGAGAAACA	172	natural antisense	NM_145039	CENPBD1	CENPB DNA-binding domain-containing protein 1	-	90036182	90039240	18.3766	18.9397	4.0978	4.01437
ASHGA5P040771	1.16628	up	noncoding	uc010pbg.1	FCGR1C	UCSC_knowngene	626	chr1	+	149369293	149370314		TTTCCAATGTACAAGCTGCTGAAGCCCTGCAATGTACTCTCAGAGACAGTATAGCTCAGA	100132417	intergenic							46.502	40.0587	5.46194	5.24002
ASHGA5P045672	1.17436	up	noncoding	ENST00000540066	TOPORS-AS1	GENCODE	662	chr9	+	32552343	32553005		TTATTCGACTTTGTTACTTTAATTCCCACCTTAGCAATGGCAACGGTAACCTGACGGGGG		natural antisense	NM_001195622	TOPORS	E3 ubiquitin-protein ligase Topors isoform 2	-	32540541	32552626	92.1792	74.5533	6.48365	6.25178
ASHGA5P045672	1.17436	up	noncoding	ENST00000540066	TOPORS-AS1	GENCODE	662	chr9	+	32552343	32553005		TTATTCGACTTTGTTACTTTAATTCCCACCTTAGCAATGGCAACGGTAACCTGACGGGGG		natural antisense	NM_005802	TOPORS	E3 ubiquitin-protein ligase Topors isoform 1	-	32540541	32552626	92.1792	74.5533	6.48365	6.25178
ASHGA5P020545	1.25091	up	noncoding	ENST00000515643	RP11-274N19.2	GENCODE	532	chr1	-	154675204	154680702		ATAGCCCCATTGGGGTGCCTCTACTTGGGAGCGGGAAGAGGAGATGACAGGAAGCGACGC		exon sense-overlapping	NM_001204087	KCNN3	small conductance calcium-activated potassium channel protein 3 isoform c	-	154669941	154842754	278.268	197.998	8.12073	7.79775
ASHGA5P020545	1.25091	up	noncoding	ENST00000515643	RP11-274N19.2	GENCODE	532	chr1	-	154675204	154680702		ATAGCCCCATTGGGGTGCCTCTACTTGGGAGCGGGAAGAGGAGATGACAGGAAGCGACGC		exon sense-overlapping	NM_002249	KCNN3	small conductance calcium-activated potassium channel protein 3 isoform a	-	154669941	154842754	278.268	197.998	8.12073	7.79775
ASHGA5P020545	1.25091	up	noncoding	ENST00000515643	RP11-274N19.2	GENCODE	532	chr1	-	154675204	154680702		ATAGCCCCATTGGGGTGCCTCTACTTGGGAGCGGGAAGAGGAGATGACAGGAAGCGACGC		exon sense-overlapping	NM_170782	KCNN3	small conductance calcium-activated potassium channel protein 3 isoform b	-	154669941	154832338	278.268	197.998	8.12073	7.79775
ASHGA5P023842	1.25085	up	noncoding	HMlincRNA639+	HMlincRNA639	LincRNAs identified by Khalil et al	13337	chr3	+	122764889	122778226		GGATATGGGTGTTGGAGTGGTTGAGAAACTGGACATTGTAGGAAAATATAATATATTGTA		intergenic							24.4595	21.0476	4.51659	4.19369
ASHGA5P023294	1.46436	up	noncoding	ENST00000577672	RP1-283E3.4	GENCODE	409	chr1	+	1655950	1667412		TGGTTACCTCGTGAGGCGCCTCAGATTCTTCTGGAGCTGGAGATGAACTCGGACCTCAAG		intronic antisense	NM_001199787	SLC35E2	solute carrier family 35 member E2 isoform 2	-	1656276	1677438	7838.13	4478.31	12.9525	12.4022
ASHGA5P023294	1.46436	up	noncoding	ENST00000577672	RP1-283E3.4	GENCODE	409	chr1	+	1655950	1667412		TGGTTACCTCGTGAGGCGCCTCAGATTCTTCTGGAGCTGGAGATGAACTCGGACCTCAAG		intronic antisense	NM_182838	SLC35E2	solute carrier family 35 member E2 isoform 1	-	1658823	1677438	7838.13	4478.31	12.9525	12.4022
ASHGA5P035604	1.12093	up	noncoding	ENST00000442062	AC074019.1	GENCODE	427	chr2	-	229548252	229549296		GGTCTGAGCTACCATAGAAAAGCTTCCCGCAACCAAATGAATTACAGACACTCAGCAAAA		intergenic							52.7496	46.969	5.65499	5.49029
ASHGA5P027351	1.0553	up	noncoding	ENST00000528692	RP5-1007M22.2	GENCODE	439	chr1	-	90097434	90098320		GCCTCCTTTTACCACGTTTCTATTTCTAAACCAAAATGAAAAGGACGTTTGTTCAAAAGA		bidirectional	NM_032270	LRRC8C	leucine-rich repeat-containing protein 8C	+	90098643	90185094	1602.62	1238.9	10.6314	10.5537
ASHGA5P034738	1.61395	up	noncoding	uc002pxc.1	AX748312	UCSC_knowngene	1503	chr19	+	52094258	52095761		ATGAAGAATGTCCTACTGTCATGTGATGTGATCAGAAAACATACTGCCCAGAGTCCCCTG		natural antisense	ENST00000301439	AC018755.11	HCG2008157; Uncharacterized protein; cDNA FLJ30403 fis, clone BRACE2008480 [Source:UniProtKB/TrEMBL;Acc:Q96NP5]	-	52095035	52097633	1089.12	568.509	10.0817	9.39112
ASHGA5P045405	1.80411	up	noncoding	TCONS_00000867	XLOC_000095	LincRNAs identified by Cabili et al	263	chr1	+	24348318	24350190		ATAAAAGTTGATGAAGCTGTAGCACCAGGAGTCCAAGCTGTGAAGGAAGTTGAGTCCTTC		intergenic							76.9097	43.2888	6.21152	5.36024
ASHGA5P036283	1.15276	up	noncoding	ENST00000582038	RP11-88L24.4	GENCODE	1955	chr2	+	179641652	179644689		GACCTTCTAATAGCTGTCTAACCCCGAGCTCATCACTTGAAAATGAAAATATCAAATAAA		natural antisense	NM_001256850	TTN	titin isoform 1	-	179390716	179672150	3487.22	2489.11	11.7519	11.5468
ASHGA5P036283	1.15276	up	noncoding	ENST00000582038	RP11-88L24.4	GENCODE	1955	chr2	+	179641652	179644689		GACCTTCTAATAGCTGTCTAACCCCGAGCTCATCACTTGAAAATGAAAATATCAAATAAA		natural antisense	NM_001267550	TTN	titin isoform IC	-	179390716	179672150	3487.22	2489.11	11.7519	11.5468
ASHGA5P036283	1.15276	up	noncoding	ENST00000582038	RP11-88L24.4	GENCODE	1955	chr2	+	179641652	179644689		GACCTTCTAATAGCTGTCTAACCCCGAGCTCATCACTTGAAAATGAAAATATCAAATAAA		natural antisense	NM_003319	TTN	titin isoform N2-B	-	179390717	179672150	3487.22	2489.11	11.7519	11.5468
ASHGA5P036283	1.15276	up	noncoding	ENST00000582038	RP11-88L24.4	GENCODE	1955	chr2	+	179641652	179644689		GACCTTCTAATAGCTGTCTAACCCCGAGCTCATCACTTGAAAATGAAAATATCAAATAAA		natural antisense	NM_133378	TTN	titin isoform N2-A	-	179390717	179672150	3487.22	2489.11	11.7519	11.5468
ASHGA5P036283	1.15276	up	noncoding	ENST00000582038	RP11-88L24.4	GENCODE	1955	chr2	+	179641652	179644689		GACCTTCTAATAGCTGTCTAACCCCGAGCTCATCACTTGAAAATGAAAATATCAAATAAA		natural antisense	NM_133379	TTN	titin isoform novex-3	-	179610046	179672150	3487.22	2489.11	11.7519	11.5468
ASHGA5P036283	1.15276	up	noncoding	ENST00000582038	RP11-88L24.4	GENCODE	1955	chr2	+	179641652	179644689		GACCTTCTAATAGCTGTCTAACCCCGAGCTCATCACTTGAAAATGAAAATATCAAATAAA		natural antisense	NM_133432	TTN	titin isoform novex-1	-	179390717	179672150	3487.22	2489.11	11.7519	11.5468
ASHGA5P036283	1.15276	up	noncoding	ENST00000582038	RP11-88L24.4	GENCODE	1955	chr2	+	179641652	179644689		GACCTTCTAATAGCTGTCTAACCCCGAGCTCATCACTTGAAAATGAAAATATCAAATAAA		natural antisense	NM_133437	TTN	titin isoform novex-2	-	179390717	179672150	3487.22	2489.11	11.7519	11.5468
ASHGA5P057076	1.13506	up	noncoding	TCONS_00012662	XLOC_005621	LincRNAs identified by Cabili et al	668	chr6	-	15753178	15758477		AATCACAGGTGTCTGACTTTTAAGTACCAGCGTTGAGTTTGGCCCTCTGCTGTTTATCAG		intergenic							471.096	353.821	8.86359	8.68082
ASHGA5P016145	1.1891	up	noncoding	ENST00000427252	AC000093.3	GENCODE	560	chr22	-	19696896	19702318		GAGAGACACGAAAAATGTAAGGGGGTCACTGCACAAATCAGTCCTCATCACCGATGGGAA		natural antisense	NM_002688	SEPT5	septin-5 isoform 1	+	19701986	19710845	62.1809	51.99	5.90125	5.65138
ASHGA5P047945	1.07692	up	noncoding	ENST00000534587	RP11-21L19.1	GENCODE	240	chr11	-	14284391	14295237		GCGTAGCTTTTGGATGGATGGATTTCGAAGGCATTTTCGGATGCGGCACTTTTTTCGCTG		natural antisense	NM_006108	SPON1	spondin-1 precursor	+	13984183	14289679	43.7654	40.6917	5.37255	5.26564
ASHGA5P035569	1.12558	up	noncoding	ENST00000411433	AC021016.8	GENCODE	535	chr2	-	219191611	219222689		AGTCCCACATTCCTGATCTGACTCCCCAGGCATATTGTGCTGCTTCTGGGGAGCTTGCCA		intronic antisense	NM_015488	PNKD	probable hydrolase PNKD isoform 1 precursor	+	219135114	219211516	276.61	216.908	8.11053	7.93986
ASHGA5P035569	1.12558	up	noncoding	ENST00000411433	AC021016.8	GENCODE	535	chr2	-	219191611	219222689		AGTCCCACATTCCTGATCTGACTCCCCAGGCATATTGTGCTGCTTCTGGGGAGCTTGCCA		intronic antisense	NM_022572	PNKD	probable hydrolase PNKD isoform 2	+	219187901	219211516	276.61	216.908	8.11053	7.93986
ASHGA5P035569	1.12558	up	noncoding	ENST00000411433	AC021016.8	GENCODE	535	chr2	-	219191611	219222689		AGTCCCACATTCCTGATCTGACTCCCCAGGCATATTGTGCTGCTTCTGGGGAGCTTGCCA		intronic antisense	NM_198559	C2orf62	uncharacterized protein C2orf62	+	219221578	219232817	276.61	216.908	8.11053	7.93986
ASHGA5P032268	1.05482	up	noncoding	ENST00000583364	AC015818.3	GENCODE	563	chr17	-	20425404	20427762	ENST00000444070, ENST00000445433, ENST00000579363, ENST00000579679, ENST00000579946, ENST00000581247, ENST00000582261, ENST00000584151, ENST00000584833, ENST00000585017, uc002gxc.1	TGAACTAATTGACACCTACCACCGCTTGCTGGAGGTTGAGGACGCCCAGTGAGTGTGCAC		intergenic							977.862	774.159	9.92679	9.84979
ASHGA5P046198	3.16817	up	noncoding	ENST00000412242	KDM5C-IT1	GENCODE	755	chrX	-	53241589	53243861		GGCTAAATTGTGTGTTAGAAACTCTGAGATATAGAAGTTCAGAGGAGAGGAAAATAGCTA		intron sense-overlapping	NM_001146702	KDM5C	lysine-specific demethylase 5C isoform 2	-	53220502	53254604	18.2668	5	4.0892	2.42556
ASHGA5P046198	3.16817	up	noncoding	ENST00000412242	KDM5C-IT1	GENCODE	755	chrX	-	53241589	53243861		GGCTAAATTGTGTGTTAGAAACTCTGAGATATAGAAGTTCAGAGGAGAGGAAAATAGCTA		intron sense-overlapping	NM_004187	KDM5C	lysine-specific demethylase 5C isoform 1	-	53220502	53254604	18.2668	5	4.0892	2.42556
ASHGA5P045136	1.46651	up	noncoding	TCONS_00002076	XLOC_000266	LincRNAs identified by Cabili et al	496	chr1	+	79735991	79775346	TCONS_00001003	AAAGGTTCAAATAGAAAAGCAGCATGGTGATGGGGCTGACTGTTCCAGAATTGATGTGCC		intergenic							59.4816	41.1136	5.83522	5.28284
ASHGA5P015094	2.52584	up	noncoding	NR_047522	LOC643837	RefSeq	6574	chr1	+	762970	794826	ENST00000416570, ENST00000425657, ENST00000448975, NR_015368, NR_047519, NR_047520, NR_047521, NR_047525, uc001abr.1	CAGTTACACAACCTCCAGGTATGATCCTGTTTAAGGACTGGATTTAGGATAACTACTTAG	643837	intergenic							15.1477	5.72221	3.80115	2.46439
ASHGA5P047513	1.33198	up	noncoding	NR_038842	LOC728431	RefSeq	1443	chr1	-	37920479	37940044		GAGATCTTAGAATGAAAGGCATTTTTAGAGATGAGAAAGAAGGAAGCCAGGCCAAGGCTG	728431	bidirectional	NM_025079	ZC3H12A	ribonuclease ZC3H12A	+	37940118	37949978	24.1983	19.813	4.50005	4.08647
ASHGA5P022733	1.50474	up	noncoding	ENST00000561715	RP11-1223D19.1	GENCODE	463	chr2	+	110988682	111003223		AGCATTAAGGGTCTTGGAGGAAGGCATCCTTCTATTCTACTGATCAGAAAGCTGGACAAA		intergenic							15.9628	12.2378	3.88025	3.29074
ASHGA5P058338	1.07552	up	noncoding	uc001iqp.1	AK055656	UCSC_knowngene	723	chr10	+	21803939	21805798		ACTTGTACAAACCATCCTGTGCAGTTTACAACAAAAGGAAGCGAAACAACTCCCCAGGCT		natural antisense	NM_207371	SKIDA1	protein DLN-1	-	21802408	21814611	62.3277	56.6918	5.90399	5.79896
ASHGA5P023362	2.6358	up	noncoding	ENST00000579301	AC005562.2	GENCODE	570	chr17	+	28927813	28942998	ENST00000514992	CCAGGCGCATGAAATCTTTAACATTACAGGTATATTGAAAAGTCTGATTCAGTTACAATC		intergenic							20.8966	8.97541	4.29054	2.8923
ASHGA5P055699	1.01482	up	noncoding	ENST00000544727	RP11-983C2.2	GENCODE	482	chr12	-	127355011	127359211	NR_033970	AAGACAGCACCGGGTTTCACACTGGCAAGGCAGGAGGCTGTGTGCTGCCAGAACGACCAG		intergenic							29.5154	30.0049	4.78859	4.76736
ASHGA5P033837	2.836	up	noncoding	TCONS_00003974	XLOC_001788	LincRNAs identified by Cabili et al	2784	chr2	+	192559981	192563100		CCTAAACACACAGAGGAGAATTACTTCAAGTATTTTTAAAACACAGTCACTTGTCTATGC		intergenic							223.05	76.363	7.79522	6.29136
ASHGA5P035235	1.08752	up	noncoding	ENST00000444301	AC068491.1	GENCODE	666	chr2	-	112071888	112252610		CTGCTGTGCTGCCTGGAGCTCTTCTGTCCGGAGGTTTAGTGAAACTAGAGAAACTCAGTG		intergenic							1334.4	1007.14	10.3673	10.2462
ASHGA5P045101	1.00539	up	noncoding	ENST00000416242	RP11-143M1.4	GENCODE	413	chr9	-	112715	113754	TCONS_00002981	GCGCACGCCTGACCGGAGCACCCCGCTTCACGGGGGCGTTCTGCGCGTCCTTCCTCCCCG		intergenic							1804.86	1483.53	10.8158	10.8081
ASHGA5P026988	1.1655	up	noncoding	ENST00000544717	RP11-319E16.1	GENCODE	754	chr12	-	5343162	5349269		GAGAATACTCTTGAGAATATTGTTCTTGGCTGTTCCAAATAGAAAGATCATCTGTCCATT		intergenic							29.5363	26.5108	4.7892	4.56825
ASHGA5P026668	2.89555	up	noncoding	ENST00000526730	RP11-7I15.4	GENCODE	277	chr11	+	77733978	77734767		CGAAAGGAGAGTGATCCCAGCAGGAGGGACGGCAAAGATTGAAGAGAGCGACCAGCCCGA		intronic antisense	NM_001203260	NDUFC2-KCTD14	NDUFC2-KCTD14 protein isoform 1	-	77726760	77791265	116.328	41.7073	6.8363	5.30247
ASHGA5P026668	2.89555	up	noncoding	ENST00000526730	RP11-7I15.4	GENCODE	277	chr11	+	77733978	77734767		CGAAAGGAGAGTGATCCCAGCAGGAGGGACGGCAAAGATTGAAGAGAGCGACCAGCCCGA		intronic antisense	NM_001203261	NDUFC2-KCTD14	NDUFC2-KCTD14 protein isoform 2	-	77726760	77791265	116.328	41.7073	6.8363	5.30247
ASHGA5P026668	2.89555	up	noncoding	ENST00000526730	RP11-7I15.4	GENCODE	277	chr11	+	77733978	77734767		CGAAAGGAGAGTGATCCCAGCAGGAGGGACGGCAAAGATTGAAGAGAGCGACCAGCCCGA		intronic antisense	NM_001203262	NDUFC2-KCTD14	NDUFC2-KCTD14 protein isoform 3	-	77726760	77791265	116.328	41.7073	6.8363	5.30247
ASHGA5P026668	2.89555	up	noncoding	ENST00000526730	RP11-7I15.4	GENCODE	277	chr11	+	77733978	77734767		CGAAAGGAGAGTGATCCCAGCAGGAGGGACGGCAAAGATTGAAGAGAGCGACCAGCCCGA		intronic antisense	NM_023930	KCTD14	BTB/POZ domain-containing protein KCTD14	-	77726760	77734320	116.328	41.7073	6.8363	5.30247
ASHGA5P045375	1.31845	up	noncoding	ENST00000445897	RP11-6F6.1	GENCODE	436	chr9	-	108823634	108827274		CACCCTTAGCAGTATCCAGCTTTTCAATTCTGACTTTACTGAGAGGAATAAAGTAATATT		intergenic							47.1444	36.3223	5.48514	5.0863
ASHGA5P015097	2.34819	up	noncoding	uc001vgk.2	THSD1P1	UCSC_knowngene	2751	chr13	-	52741846	52768575	ENST00000416599, NR_051965, uc001vgl.1, uc001vgm.1	GAGCTGACTGAATTCTGAACAAGAAAAACATATTCAAGGGGAAGAGATGTAATAGTTTTG	374500	intergenic							13.7557	5	3.6571	2.42556
ASHGA5P032753	3.95298	up	noncoding	ENST00000425277	AC099684.1	GENCODE	1747	chr17	+	1921176	1924000		TCAGGGATGGCATTAACTTATAAATGAGTGTGTTTGACTGATTTTGTGGTTGATGTACAG		intronic antisense	NM_178568	RTN4RL1	reticulon-4 receptor-like 1 precursor	-	1837970	1928178	29.8087	8.48437	4.8019	2.81896
ASHGA5P016682	1.16046	up	noncoding	ENST00000432922	RP5-884C9.2	GENCODE	593	chr1	+	38512985	38571406		TGAGGCCCAGGGGAGGCAGAGTCCTTCTGGAGTTTGACCCTTGGATTCCATCCAGAGCAG		bidirectional	NM_002699	POU3F1	POU domain, class 3, transcription factor 1	-	38509522	38512450	203.882	158.234	7.66507	7.45038
ASHGA5P015768	1.33304	up	noncoding	ENST00000423332	CYP4Z2P	pseudogene	1512	chr1	-	47308849	47366106		CTATGCCTTCATACCATTCTCAGCTGGATTAAGAAGTTTGCTAATTTTAAGTCCTTTCAT	163720								60.0755	45.4409	5.85051	5.4358
ASHGA5P023029	1.12995	up	noncoding	ENST00000568048	FAM157C	GENCODE	474	chr16	+	90195030	90204332	ENST00000417964	TTCAACTCTGAGAAATGGAATCATCGTATCGCTGATCTACGTAAACAAACTGAAGAATTG		intergenic							293.837	228.609	8.19943	8.02317
ASHGA5P019502	1.64728	up	noncoding	NR_033714	VAMP7	RefSeq	2606	chrX	+	155110942	155173433		CACATGGCAAGATTTTGAACGTTCCCGAGCCTTTAATTTTCTGAATGAGATAAAGAAGAG	6845	exon sense-overlapping	NM_001145149	VAMP7	vesicle-associated membrane protein 7 isoform 2	+	155110942	155173433	121.143	71.1819	6.8973	6.17722
ASHGA5P019502	1.64728	up	noncoding	NR_033714	VAMP7	RefSeq	2606	chrX	+	155110942	155173433		CACATGGCAAGATTTTGAACGTTCCCGAGCCTTTAATTTTCTGAATGAGATAAAGAAGAG	6845	exon sense-overlapping	NM_001185183	VAMP7	vesicle-associated membrane protein 7 isoform 3	+	155110942	155173433	121.143	71.1819	6.8973	6.17722
ASHGA5P019502	1.64728	up	noncoding	NR_033714	VAMP7	RefSeq	2606	chrX	+	155110942	155173433		CACATGGCAAGATTTTGAACGTTCCCGAGCCTTTAATTTTCTGAATGAGATAAAGAAGAG	6845	exon sense-overlapping	NM_005638	VAMP7	vesicle-associated membrane protein 7 isoform 1	+	155110942	155173433	121.143	71.1819	6.8973	6.17722
ASHGA5P018588	1.46099	up	noncoding	ENST00000455327	RP1-40E16.3	GENCODE	335	chr6	-	3051334	3053987		TGGCTGGAGGGACACCTGGCCTGGGTGGAGCCCACTCCTCAGCACCCACCTCACTTCTGG		intergenic							2244.43	1261.77	11.1267	10.5797
ASHGA5P000305	1.21804	up	noncoding	chr18:10217025-10229050-	chr18:10217025-10229050	LincRNAs identified by Khalil et al	12025	chr18	-	10227025	10239050		TTATGCTTGCTACAAATGAAAATTAAAATGACTCTGAGGATTGCTGCCTGCCTCCTGCTG		intergenic							751.016	521.4	9.54498	9.26042
ASHGA5P000478	2.8205	up	noncoding	chr6:48613250-48635850+	chr6:48613250-48635850	LincRNAs identified by Khalil et al	22600	chr6	+	48505291	48527891		CAATGCTTGAGAGACAGCACTAAACAAAGTACAAGAAAAATCCCTCTTGAAGCATAAATT		intergenic							70.366	26.7724	6.08047	4.58452
ASHGA5P032000	1.11223	up	noncoding	BE551409		LincRNAs identified by Khalil et al	469	chr10	+	74008180	74008649		AAACGGGTCTTATTTGAAAATGGTAAAACCTGGCCAGGCCTTGGACTTCCTGCATTGGTT		intergenic							37.4878	34.1696	5.13928	4.98583
ASHGA5P052084	1.35897	up	noncoding	NR_033939	LOC100129858	RefSeq	2017	chr4	-	141204879	141294546		GCGGCTCATCAGGTCTATCAGGAAACCTGAGAATTGGAGTGAGAATCCCAGTGTGGAAAA	100129858	intronic antisense	NM_001153446	SCOC	short coiled-coil protein isoform 4	+	141264596	141303710	89.0941	63.3139	6.42888	5.98637
ASHGA5P052084	1.35897	up	noncoding	NR_033939	LOC100129858	RefSeq	2017	chr4	-	141204879	141294546		GCGGCTCATCAGGTCTATCAGGAAACCTGAGAATTGGAGTGAGAATCCCAGTGTGGAAAA	100129858	intronic antisense	NM_001153585	SCOC	short coiled-coil protein isoform 4	+	141264614	141303710	89.0941	63.3139	6.42888	5.98637
ASHGA5P052084	1.35897	up	noncoding	NR_033939	LOC100129858	RefSeq	2017	chr4	-	141204879	141294546		GCGGCTCATCAGGTCTATCAGGAAACCTGAGAATTGGAGTGAGAATCCCAGTGTGGAAAA	100129858	intronic antisense	NM_001153635	SCOC	short coiled-coil protein isoform 5	+	141264596	141303710	89.0941	63.3139	6.42888	5.98637
[truncated: 14,344 more rows]

## Sheet: down_H30_KLF5_vs_L5_5_KLF5
# Fold Change cut-off: 1.0 # Condition pairs: H30_KLF5_vs_L5_5_KLF5 # Column A: ProbeName it represents probe name. # Column B: Fold change, Absolute Fold change between two samples. # Column C: Regulation, it depicts which sample has greater or lower intensity values wrt other sample. # Column D ~ V: Annotations to each probe, including type, seqname, GeneSymbol, source, RNAlength, chrom, strand…
[truncated: 17,453 more rows]

[truncated: 2 more sheets: down_G30 mM_vs_ G5.5 mM, up G30 mM_vs_ G5.5 mM]
